# Supplementary material for: Transcriptome Profile Reveals that Pu-Erh Tea Represses the Expression of Vitellogenin Family to Reduce Fat Accumulation in Caenorhabditis elegans
Source: Molecules. 2016 Oct 17;21(10):1379. doi: 10.3390/molecules21101379 (PMC6274137; doi:10.3390/molecules21101379)
Supplement: Supplementary file 1 [file molecules-21-01379-s001.xlsx]

## Sheet: all expression PTE 0.025gmL
Gene_Id	Gene	Con1	Con2	Con3	PTE0.025g/mL-1	PTE0.025g/mL-2	PTE0.025g/mL-3
XLOC_000001	nlp-40	193.751	205.712	296.483	260.074	292.901	393.665	695.946	946.64
XLOC_000004	Y74C9A.1	0.331089	0.341666	0.915231	0.482985	0.796024	0.544359	1.58799	1.82337
XLOC_000005	Y48G1C.12	14.8292	12.898	15.8215	15.1686	13.3228	16.563	43.5487	45.0544
XLOC_000006	pgs-1	13.4024	13.788	16.709	13.1791	12.2922	17.8937	43.8994	43.365
XLOC_000007	Y48G1C.10,Y48G1C.11,csk-1	29.5342	32.6196	30.4053	34.9935	30.3038	27.0748	92.5591	92.3721
XLOC_000008	Y48G1C.9	38.9926	43.1912	45.8278	35.2653	38.3149	44.0053	128.012	117.585
XLOC_000009	Y48G1C.1	14.659	16.5044	12.5205	13.5387	11.9407	9.66148	43.6839	35.1409
XLOC_000011	F53G12.13,F53G12.9,rpl-7	3479.9	3645.14	2754.87	3353.94	3146.77	2889.49	9879.91	9390.2
XLOC_000013	F53G12.8	27.8532	25.7019	2.22256	22.5123	22.0624	1.76542	55.7777	46.3401
XLOC_000014	col-45	0.244173	0.35426	0.428244	0.386024	0	0.424085	1.02668	0.810109
XLOC_000015	spe-8	12.4971	10.3433	2.01768	10.8046	8.68996	0.508472	24.8581	20.003
XLOC_000016	mex-3	47.3599	49.2499	14.3758	35.1521	28.1879	13.9221	110.986	77.2621
XLOC_000017	F53G12.4	0.601818	0.355784	0.58585	0.496504	0.494353	0.371178	1.54345	1.36204
XLOC_000018	duox-2	0.0226604	0.000431787	0.0313877	0.0443262	0.0217594	1.77566e-05	0.0544799	0.0661034
XLOC_000019	F56C11.6	25.0779	24.8599	19.8846	34.3981	35.9423	15.7249	69.8224	86.0653
XLOC_000020	F56C11.5	16.6456	14.9388	26.791	18.5632	18.455	32.0027	58.3754	69.0209
XLOC_000021	F56C11.4,K10E9.1,atm-1	7.29791	5.9952	9.08318	5.45707	5.6961	7.95007	22.3763	19.1032
XLOC_000023	Y48G1BL.7	1.2168	1.02356	0.606716	1.29415	1.26998	1.20564	2.84708	3.76977
XLOC_000024	Y48G1BL.1	2.75033	3.80673	4.06042	3.25964	2.02414	2.0909	10.6175	7.37468
XLOC_000025	Y48G1BM.2	0.0584695	0	0.408714	0	0	0.130109	0.467184	0.130109
XLOC_000026	Y48G1BM.1	6.1341	5.37701	4.74213	4.66517	4.79479	3.668	16.2532	13.128
XLOC_000027	C53D5.2,C53D5.3	5.53652	6.11624	11.847	3.38399	3.65223	2.36018	23.4998	9.3964
XLOC_000028	C53D5.1	16.3521	16.4549	16.0092	13.1635	15.5153	14.6704	48.8162	43.3492
XLOC_000029	Y48G1A.4	24.4335	27.3617	12.1012	21.694	22.4915	13.2664	63.8964	57.4519
XLOC_000030	Y48G1A.3	25.2186	24.4935	22.8197	25.0896	21.8854	22.5836	72.5318	69.5586
XLOC_000031	Y48G1A.1,Y48G1A.2	6.15465	7.9817	7.21132	6.35568	6.62374	8.66086	21.3477	21.6403
XLOC_000032	rnp-8	27.5628	26.201	19.6686	22.016	18.7246	14.967	73.4324	55.7076
XLOC_000033	taf-4	18.2022	19.0203	17.2658	18.0115	15.6811	18.1054	54.4883	51.798
XLOC_000034	Y50C1A.1	14.44	12.8724	11.8118	10.7533	12.9843	12.2051	39.1242	35.9427
XLOC_000035	C07F11.2	0.882229	0.631622	0.660723	0.922858	0.789177	1.49211	2.17457	3.20415
XLOC_000036	tol-1	5.29076	5.29491	9.96037	6.83287	6.0703	12.2196	20.546	25.1228
XLOC_000037	W04C9.4	199.099	198.109	110.741	187.146	164.558	107.147	507.949	458.851
XLOC_000039	cutl-13	0	0.0701252	0	0.0647561	0	0.0718975	0.0701252	0.136654
XLOC_000040	W04C9.2,haf-4	226.026	262.322	293.361	260.566	247.766	338.079	781.709	846.411
XLOC_000041	deps-1	52.3043	52.119	22.0492	43.3624	39.407	18.526	126.472	101.295
XLOC_000042	Y65B4BL.10	0	0	0	141.824	0	0	0	141.824
XLOC_000045	Y65B4BL.1	13.776	15.9003	253.71	41.7211	43.7309	304.377	283.386	389.829
XLOC_000046	Y65B4BR.8	18.2979	15.9832	15.8486	17.6549	15.0545	13.4398	50.1297	46.1492
XLOC_000047	Y65B4BR.5	1331.48	1447.67	950.77	1253.48	1147.94	1006.75	3729.92	3408.17
XLOC_000048	wwp-1	87.9756	88.9879	64.1863	87.229	80.8658	64.3503	241.15	232.445
XLOC_000049	lpr-1,ptr-21	23.9574	25.2225	73.1162	42.0395	38.3938	119.887	122.296	200.32
XLOC_000051	Y65B4BR.1	0	0.259045	0.325436	0.157437	0.0790572	0.428838	0.584481	0.665332
XLOC_000053	sago-2	16.207	17.8815	20.811	19.5431	23.0481	23.9613	54.8995	66.5525
XLOC_000054	Y65B4A.4	0.581385	0.735056	4.2811	2.6725	3.11408	2.38031	5.59754	8.16689
XLOC_000055	vps-20	86.4842	99.1785	78.8127	95.8741	85.0064	86.9334	264.475	267.814
XLOC_000056	Y65B4A.2	21.6583	23.8713	9.15913	20.5164	16.1503	7.66738	54.6887	44.3341
XLOC_000057	Y65B4A.1	30.1419	28.7121	31.1538	29.576	28.1562	26.8656	90.0078	84.5978
XLOC_000058	Y18H1A.11	22.7893	24.0185	4.69476	17.6176	15.6819	2.55577	51.5026	35.8553
XLOC_000059	Y18H1A.1	6.78501	8.02463	0.338107	4.97356	4.48135	0.133655	15.1477	9.58856
XLOC_000060	pif-1	6.36086	5.8247	5.81007	6.26052	5.49157	5.22322	17.9956	16.9753
XLOC_000061	col-47	1.02018	1.23394	13.4013	2.82251	1.7731	22.4039	15.6554	26.9995
XLOC_000063	Y18H1A.8	3.72193	4.62787	1.6095	3.57575	3.81885	1.01083	9.9593	8.40543
XLOC_000065	T06A4.3	58.9704	66.372	77.3031	59.2388	62.9852	77.1356	202.645	199.36
XLOC_000066	T06A4.1	5.34562	6.15299	21.7831	10.2028	10.919	11.2452	33.2817	32.367
XLOC_000067	T06A4.5	2.69877	0	3.54564	0	0	0	6.24441	0
XLOC_000069	ZC123.1,ZC123.3	19.9194	19.5559	94.3022	35.1091	37.5285	89.1267	133.778	161.764
XLOC_000077	Y95B8A.7,Y95B8A.8	36.6319	39.0933	33.8302	36.2569	29.7	30.438	109.555	96.3949
XLOC_000078	Y95B8A.6	4.9254	4.00701	4.4658	3.87707	4.15964	7.0618	13.3982	15.0985
XLOC_000079	gpa-16	28.0434	26.0455	24.1703	26.3341	25.442	19.4036	78.2592	71.1797
XLOC_000080	Y95B8A.4	17.6904	13.5598	3.11705	13.587	14.6309	0.246837	34.3672	28.4647
XLOC_000082	Y95B8A.2,nas-30	124.519	149.577	11.7207	44.6947	32.427	4.03477	285.817	81.1565
XLOC_000084	hmbx-1	3.65479	5.82761	4.22407	2.05008	1.37186	7.15692	13.7065	10.5789
XLOC_000085	C54G6.2,C54G6.3	0.904678	1.29506	0.688796	1.15685	0.629534	1.60405	2.88853	3.39043
XLOC_000087	spp-17	1160.47	1329.81	1106.46	1719.23	1869.18	1627.42	3596.74	5215.83
XLOC_000088	spp-23	103.212	119.461	216.598	192.276	207.677	279.146	439.271	679.099
XLOC_000089	Y34D9A.3	11.083	11.1805	10.6741	9.64559	8.77209	8.69124	32.9376	27.1089
XLOC_000090	Y34D9A.7	10.4856	11.2882	9.35337	10.8585	9.23082	8.66015	31.1272	28.7495
XLOC_000091	glrx-10	225.038	226.84	231.544	224.184	213.292	261.372	683.422	698.848
XLOC_000092	Y34D9A.2	3.56229	4.71834	3.33006	3.33942	4.17732	3.97555	11.6107	11.4923
XLOC_000093	R06A10.1,R06A10.5,gsa-1	18.5185	18.0846	10.2798	13.0092	17.7675	12.0986	46.8829	42.8753
XLOC_000094	ZK993.2	0	0.102779	0	0.0652165	0	0.0366772	0.102779	0.101894
XLOC_000096	ceh-45	1.24346	0.437358	0.743353	0.664579	0.93719	0.886293	2.42417	2.48806
XLOC_000098	rpl-17	3630.58	3908.98	3084	3577.24	3492.28	3435.63	10623.6	10505.2
XLOC_000099	Y48G8AL.7	8.22282	8.96408	9.14546	9.28691	6.15941	8.04278	26.3324	23.4891
XLOC_000100	smg-2	29.3184	29.829	20.8314	27.0651	24.8574	22.666	79.9788	74.5885
XLOC_000101	Y48G8AL.1,Y48G8AL.15,Y48G8AL.5	68.0711	70.6855	51.7743	63.3771	56.3207	47.2035	190.531	166.901
XLOC_000103	Y48G8AR.2	0.662947	0.904312	1.06615	0.707359	0.634341	1.61118	2.63341	2.95288
XLOC_000104	Y48G8AR.3	0	0.353014	0	0	0	0	0.353014	0
XLOC_000105	dapk-1	26.2665	26.7759	25.3359	22.5275	23.4117	28.9385	78.3783	74.8777
XLOC_000106	K12C11.3,K12C11.5,K12C11.6,K12C11.7	40.4778	52.0969	28.449	35.849	35.8888	27.5524	121.024	99.2902
XLOC_000107	smo-1	209.544	196.587	170.011	215.134	185.322	173.808	576.142	574.264
XLOC_000108	Y92H12BL.1	25.8192	26.026	20.2718	23.9685	24.6405	20.2229	72.117	68.8319
XLOC_000109	Y92H12BL.5	16.2913	16.5094	14.7084	13.5198	16.3083	20.8666	47.5091	50.6947
XLOC_000111	Y92H12BR.7	8.57133	7.2494	6.56411	9.08961	6.67748	7.49686	22.3848	23.264
XLOC_000112	set-29	17.6884	19.9296	20.9931	18.2582	16.7771	18.5661	58.6111	53.6014
XLOC_000113	Y92H12BR.3	58.9026	52.2784	59.4541	56.9946	56.5967	82.9279	170.635	196.519
XLOC_000114	Y92H12BR.8	85.5376	83.9251	77.8776	90.4245	79.2174	90.1024	247.34	259.744
XLOC_000115	spe-15	35.9277	35.3236	7.35301	30.1812	25.4376	5.64338	78.6043	61.2622
XLOC_000117	F47G6.3	13.0093	14.313	3.23119	12.0166	13.299	1.97355	30.5535	27.2891
XLOC_000118	acs-16	11.3861	13.7574	14.1624	13.5508	12.7597	12.6046	39.3059	38.9151
XLOC_000119	dyb-1	3.49137	4.14541	4.53274	3.49595	3.13412	4.95583	12.1695	11.5859
XLOC_000120	Y92H12A.3,Y92H12A.4	6.05815	8.36886	7.67833	6.65398	6.66002	10.0704	22.1053	23.3844
XLOC_000121	Y92H12A.2	26.3834	28.3823	15.013	23.6214	20.2829	15.62	69.7787	59.5243
XLOC_000122	src-1	22.1969	19.5932	28.5226	23.7682	23.0616	35.4498	70.3127	82.2796
XLOC_000124	Y73E7A.3	16.8299	14.4691	18.8449	18.3381	17.1222	19.1531	50.1439	54.6134
XLOC_000125	Y73E7A.2	13.325	14.0324	12.129	15.5981	15.4001	10.1686	39.4864	41.1668
XLOC_000126	adpr-1	12.2806	11.3894	11.0217	10.7121	12.4562	16.6932	34.6917	39.8615
XLOC_000127	Y73E7A.1	75.985	85.7168	67.2515	76.6399	77.3161	71.9415	228.953	225.898
XLOC_000128	Y73E7A.8	1.9679	2.41554	43.2288	4.66074	3.60359	67.2901	47.6122	75.5544
XLOC_000129	Y71G12B.18	18.8716	14.8933	0	15.3452	12.8101	0	33.7649	28.1553
XLOC_000131	Y71G12B.17	33.3626	33.6504	54.2541	39.2397	45.4746	48.7245	121.267	133.439
XLOC_000132	drag-1	4.53909	5.83461	7.42802	5.25408	4.58429	5.78892	17.8017	15.6273
XLOC_000133	ubc-3	77.9891	83.0995	46.5078	64.5898	61.0165	51.0874	207.596	176.694
XLOC_000135	lsm-6	83.9004	86.5142	82.4943	100.221	94.7206	101.522	252.909	296.464
XLOC_000136	Y71G12B.13	14.586	16.309	16.4812	14.7285	14.6575	14.6294	47.3762	44.0154
XLOC_000137	atg-5	22.3976	22.16	23.9334	22.3125	27.2304	25.6665	68.491	75.2094
XLOC_000138	Y71G12B.11	55.0981	55.2372	60.0958	64.9009	62.4776	56.7196	170.431	184.098
XLOC_000139	Y71G12B.10	47.8137	47.2443	63.2246	46.5896	49.2565	66.1209	158.283	161.967
XLOC_000140	lin-65	10.4254	10.4144	7.51396	8.56858	9.12066	9.11683	28.3538	26.8061
XLOC_000141	Y71G12B.8	46.7376	48.7646	26.8485	46.5441	40.4545	26.7338	122.351	113.732
XLOC_000142	Y71G12B.7	0	0	0	0.502861	0	0	0	0.502861
XLOC_000143	Y71G12B.6	10.317	10.7834	78.2326	19.0023	19.5105	130.256	99.333	168.769
XLOC_000144	Y71G12B.5	0.0911595	0.158735	0.0830042	0.0891655	0.05887	0.0330996	0.332899	0.181135
XLOC_000145	pghm-1	30.9169	34.4074	52.9003	31.098	31.5014	50.3327	118.225	112.932
XLOC_000146	Y71G12B.3	26.3872	23.1207	3.82163	23.3338	15.0137	2.69772	53.3295	41.0452
XLOC_000147	Y71G12B.2	0.762544	0.557346	0.903559	0.733891	0.933509	1.07082	2.22345	2.73822
XLOC_000148	Y71G12B.1	31.0663	31.2639	36.8117	31.8681	28.4357	33.1069	99.1419	93.4107
XLOC_000149	Y71G12B.28	0.653253	0.340549	0	0.318118	0	0.360332	0.993802	0.67845
XLOC_000150	C53H9.2	181.47	186.468	112.994	156.817	144.509	103.027	480.932	404.353
XLOC_000151	rpl-27	5554.86	5740.63	4771.81	5733.44	5572.98	5363.27	16067.3	16669.7
XLOC_000152	egl-30,emr-1	96.2593	108.362	113.306	101.782	102.555	124.577	317.927	328.914
XLOC_000153	nlp-12	34.826	34.9362	62.151	44.7108	46.6628	91.0896	131.913	182.463
XLOC_000154	tag-96	12.6415	13.7766	11.6888	12.6338	14.2617	11.2124	38.1069	38.1079
XLOC_000155	tub-2	15.733	17.5255	19.5733	17.2182	18.4731	23.2006	52.8318	58.8919
XLOC_000156	Y51F10.6,Y71G12A.2	4.50136	5.13439	7.35108	5.0898	5.1053	8.56631	16.9868	18.7614
XLOC_000157	Y51F10.4,hex-4	28.4613	25.769	32.796	23.7045	27.7818	37.6626	87.0263	89.1489
XLOC_000158	Y51F10.11	6.68119	8.93741	7.16999	8.92982	6.33511	7.96534	22.7886	23.2303
XLOC_000159	Y51F10.3	25.2663	27.3468	24.8566	28.2849	25.1638	25.0309	77.4697	78.4796
XLOC_000161	Y51F10.2	24.5598	20.7771	6.28731	15.8552	12.3875	6.78043	51.6242	35.0231
XLOC_000162	Y20F4.2	11.3795	13.3053	11.7727	10.5232	10.2349	11.7193	36.4575	32.4774
XLOC_000163	arl-13,moag-4,rpb-10	319.723	339.665	341.889	359.003	359.199	384.953	1001.28	1103.15
XLOC_000165	phb-1	350.195	370.541	573.319	331.294	312.287	640.829	1294.05	1284.41
XLOC_000166	Y37E3.10	206.388	203.727	231.148	198.206	187.792	242.414	641.263	628.412
XLOC_000167	Y37E3.11	51.1484	59.5628	48.0296	59.1854	62.2367	48.296	158.741	169.718
XLOC_000169	npp-13	33.9062	35.1605	33.6218	33.9416	32.0328	34.8524	102.689	100.827
XLOC_000170	Y37E3.17	110.69	117.167	123.881	111.42	109.049	134.15	351.738	354.619
XLOC_000174	afd-1	18.5931	20.5042	27.2902	23.5425	23.6236	24.0452	66.3875	71.2113
XLOC_000175	W03F11.5	1.67247	2.02253	6.60952	4.05546	1.2856	10.4497	10.3045	15.7908
XLOC_000176	lgc-51	0	0.0833287	0.108561	0	0	0	0.19189	0
XLOC_000177	F12B6.2	14.246	12.4584	12.3199	10.5693	10.346	18.5989	39.0243	39.5142
XLOC_000180	Y39G10AL.1	0.250429	0.263165	0.335945	0.717522	0.961282	1.33363	0.849539	3.01243
XLOC_000181	Y39G10AR.11	22.1554	21.7739	18.1924	20.7861	21.198	20.2961	62.1217	62.2802
XLOC_000182	epg-2	9.44485	9.23975	10.0666	10.3847	10.1781	7.68721	28.7512	28.25
XLOC_000183	Y39G10AR.21,Y39G10AR.9	35.7656	39.0419	50.7714	33.8116	33.9445	47.1847	125.579	114.941
XLOC_000184	Y39G10AR.20	69.5707	65.3199	73.1522	66.9476	57.8387	70.8228	208.043	195.609
XLOC_000185	Y39G10AR.8	194.725	196.685	136.425	175.091	173.248	156.696	527.835	505.035
XLOC_000186	Y39G10AR.7	10.7707	10.2281	7.40023	8.96737	8.48343	5.87727	28.399	23.3281
XLOC_000187	srbc-64	0	0.185765	0	0	0.174063	0	0.185765	0.174063
XLOC_000188	ugt-31	5.61933	4.56385	2.74464	5.46873	5.19442	2.11626	12.9278	12.7794
XLOC_000189	zeel-1	0	0	0.0517843	0	0	0	0.0517843	0
XLOC_000191	Y39G10AR.25	34.675	28.571	3.4766	21.4756	26.4138	0.719254	66.7226	48.6087
XLOC_000192	nekl-1	0.271972	0.345973	0.376904	0.352654	0.146674	0.398665	0.994849	0.897993
XLOC_000194	zwl-1	26.9652	23.2808	14.7094	23.2903	20.8321	15.3169	64.9554	59.4393
XLOC_000196	F23C8.13	2.96455	1.69332	3.12271	2.72122	1.56733	2.76074	7.78058	7.04929
XLOC_000197	ubxn-1	54.9717	52.8459	42.2818	50.4516	46.2996	44.4303	150.099	141.181
XLOC_000198	F23C8.3	2.4069	1.89352	7.4017	3.38134	3.50325	6.07222	11.7021	12.9568
XLOC_000200	F23C8.1	3.51914	2.55856	0.529478	2.04942	1.92549	0.4233	6.60718	4.39821
XLOC_000201	Y74C10AR.2	0	1.4312	0.309049	1.32377	1.32215	0.490746	1.74025	3.13667
XLOC_000202	eif-3.I	168.883	182.234	147.769	165.143	150.758	167.461	498.886	483.362
XLOC_000203	Y23H5B.6	44.3578	47.4283	32.9959	42.7249	37.2518	29.2819	124.782	109.259
XLOC_000204	Y23H5B.5	45.9009	44.3743	25.6697	42.0445	38.0879	26.3579	115.945	106.49
XLOC_000207	Y23H5B.4	1.7007	1.3219	1.81302	1.30012	1.44101	1.36327	4.83562	4.1044
XLOC_000208	Y23H5B.3	1.86435	1.20434	3.20128	1.35278	2.23677	1.51883	6.26997	5.10838
XLOC_000209	Y23H5B.2	4.3232	7.36383	2.18178	3.89061	4.2267	0.224219	13.8688	8.34153
XLOC_000210	Y23H5B.1	2.41786	2.53032	1.52084	3.07113	2.52159	2.42098	6.46902	8.0137
XLOC_000211	Y23H5B.12	3.03182	2.3969	1.00826	2.3974	1.95806	0.321094	6.43698	4.67655
XLOC_000212	C55C2.4	3.89135	3.69456	0.971932	3.64516	4.45037	0	8.55784	8.09553
XLOC_000213	C55C2.3	3.32407	4.11071	0.220443	2.48845	1.99329	0.175919	7.65522	4.65766
XLOC_000214	ssp-19	12.9947	6.03542	1.39443	8.03984	5.5611	0.552209	20.4245	14.1531
XLOC_000216	K07A3.3	15.8974	13.8648	1.78771	10.9444	9.93222	1.21328	31.5499	22.0899
XLOC_000217	ctn-1	10.0397	10.9701	18.2659	13.5565	13.9545	23.1576	39.2757	50.6686
XLOC_000219	Y23H5A.4	15.3347	15.3328	2.64847	11.6281	12.4028	1.20314	33.316	25.234
XLOC_000220	Y23H5A.3	65.3578	63.6576	40.0181	56.601	44.1255	40.5182	169.034	141.245
XLOC_000221	Y23H5A.2	7.4122	6.31741	6.51211	6.10168	4.66758	6.8289	20.2417	17.5982
XLOC_000222	Y23H5A.1	4.33296	3.24169	8.58068	4.8414	4.62627	7.51645	16.1553	16.9841
XLOC_000223	Y23H5A.8	1.42941	0.947329	2.91146	0.696419	0.526697	1.57239	5.2882	2.79551
XLOC_000224	F40E3.7	1.59769	0	1.07934	0.768858	1.15741	0.86066	2.67703	2.78693
XLOC_000225	F40E3.3	0.491114	0	0	0	0.468556	0	0.491114	0.468556
XLOC_000226	F40E3.2	32.7269	35.159	34.4467	32.8	29.3839	31.4091	102.333	93.593
XLOC_000228	F32B5.6	29.8782	29.8967	32.8892	28.4077	29.9904	32.7726	92.6641	91.1707
XLOC_000233	F32B5.4	85.8263	79.177	2.61311	46.9276	45.7076	0	167.616	92.6352
XLOC_000234	F32B5.3	1.04454	0.873516	0	0.711827	0.202835	0	1.91806	0.914662
XLOC_000235	F32B5.2	0.85739	1.22636	0.745239	1.35988	1.87461	0.825413	2.82899	4.0599
XLOC_000236	F32B5.1	94.909	97.8554	77.7703	87.8879	79.2665	76.156	270.535	243.31
XLOC_000238	lin-17	12.9419	13.4425	16.9748	12.9277	11.8239	20.8892	43.3592	45.6408
XLOC_000239	snr-7	407.909	370.389	307.661	401.02	419.574	267.607	1085.96	1088.2
XLOC_000240	yop-1	230.264	227.139	197.31	210.877	201.579	220.178	654.713	632.634
XLOC_000241	Y71F9B.2	27.5553	22.5664	31.0299	24.9924	27.5391	35.2547	81.1516	87.7862
XLOC_000247	Y71F9B.1	22.8116	18.4116	51.9594	19.881	17.1488	71.0561	93.1826	108.086
XLOC_000248	W03D8.10	24.6266	23.1826	6.94729	17.9953	16.5841	3.14384	54.7565	37.7232
XLOC_000249	W03D8.8	7.3607	7.04184	10.4496	12.0888	9.10102	12.5305	24.8521	33.7203
XLOC_000250	W03D8.7	2.02842	1.40096	0	0.218349	0.650663	0	3.42938	0.869012
XLOC_000252	itx-1	17.084	19.1833	20.4789	20.3785	23.3287	25.3874	56.7462	69.0946
XLOC_000253	W03D8.5	13.6	12.7515	1.69904	10.4891	8.46464	0.246443	28.0505	19.2002
XLOC_000254	W03D8.11	1.09393	1.41586	23.567	2.25305	2.48726	26.4246	26.0768	31.1649
XLOC_000260	ccb-2	0.390633	0.205412	0.538017	0.38165	0.190435	0.213194	1.13406	0.785279
XLOC_000263	Y71F9AL.10	15.1249	13.9766	20.5403	14.3802	10.2882	16.0133	49.6418	40.6817
XLOC_000264	Y71F9AL.9	339.587	357.947	307.652	318.233	329.338	359.183	1005.19	1006.75
XLOC_000265	Y71F9AL.8	11.7431	14.613	12.0265	12.595	9.65747	10.8539	38.3826	33.1064
XLOC_000266	Y71F9AL.7	0	0	0	0	0.22129	0.123504	0	0.344794
XLOC_000267	Y71F9AL.6	0	0	0.210119	0.296775	0.149317	0.166948	0.210119	0.61304
XLOC_000268	gst-43	25.1137	26.0618	27.4367	20.6761	22.0175	34.8975	78.6122	77.5911
XLOC_000269	Y71F9AL.4	8.1367	8.7932	3.71719	6.86112	7.61643	3.29792	20.6471	17.7755
XLOC_000270	Y71F9AL.2	18.6785	15.7996	3.13708	18.0594	16.0921	1.04263	37.6152	35.1941
XLOC_000271	Y71F9AL.1	14.3082	14.0054	12.5874	11.6025	11.8558	10.5486	40.901	34.0069
XLOC_000272	trap-1	741.726	806.346	602.977	663.848	708.024	685.421	2151.05	2057.29
XLOC_000273	nxt-1	98.501	107.715	88.6786	98.772	94.6275	106.163	294.895	299.562
XLOC_000274	cogc-3	16.2931	16.1045	22.9452	19.5138	17.3316	22.6334	55.3428	59.4788
XLOC_000277	dnj-28	21.1852	18.7412	8.4743	17.7243	17.272	7.8277	48.4007	42.824
XLOC_000278	Y54E10BL.3	3.44381	2.91133	3.17498	1.27675	2.35174	1.81306	9.53012	5.44155
XLOC_000279	Y54E10BR.4	72.5774	70.7239	40.1985	66.5851	64.5252	39.7007	183.5	170.811
XLOC_000281	col-48	531.739	652.229	595.877	706.361	762.337	411.238	1779.85	1879.94
XLOC_000282	Y54E10BL.1	1.92774	0.669217	0.846316	0.606023	0	0.669606	3.44327	1.27563
XLOC_000283	Y54E10BR.3	49.15	44.4324	41.2893	45.6405	42.9773	37.9817	134.872	126.6
XLOC_000284	Y54E10BR.2	20.0438	21.6338	19.885	22.1026	17.1947	21.7621	61.5626	61.0594
XLOC_000285	Y54E10BR.1	13.3007	12.4955	12.3515	12.8722	12.8469	13.8272	38.1477	39.5463
XLOC_000287	nhr-64	8.33219	8.80359	14.0339	9.54886	9.98844	12.5752	31.1697	32.1125
XLOC_000289	col-49	1319.36	1570.01	858.561	1732.46	1748.05	447.628	3747.93	3928.14
XLOC_000290	K09H9.2	11.191	10.8089	14.0692	9.07906	7.13334	8.17538	36.0691	24.3878
XLOC_000291	K09H9.1	0.0914357	0	0.126674	0.0898721	0.0874917	0	0.21811	0.177364
XLOC_000292	Y54E10A.6,Y54E10A.7	62.3505	64.6361	66.7182	59.7128	66.2938	61.0486	193.705	187.055
XLOC_000293	dnc-6	36.8194	35.3309	35.131	35.8617	37.0523	37.2051	107.281	110.119
XLOC_000294	Y54E10A.17	103.33	117.205	195.482	99.8623	94.4099	279.904	416.017	474.176
XLOC_000295	fog-1	4.60161	4.48681	7.75776	4.1662	2.81643	10.0251	16.8462	17.0077
XLOC_000296	Y54E10A.3,cogc-1	85.0171	83.063	81.5991	88.3563	93.1214	90.4554	249.679	271.933
XLOC_000300	tyr-5	0.820016	0.614049	0.650283	0.981779	0.913865	0.969034	2.08435	2.86468
XLOC_000302	nol-5	431.872	436.23	204.386	379.806	359.768	203.048	1072.49	942.622
XLOC_000304	sulp-6	9.93943	9.61142	2.5369	7.06505	7.46598	2.01623	22.0877	16.5473
XLOC_000305	W01B11.1	5.5205	16.3264	2.17965	5.28769	5.28901	0	24.0265	10.5767
XLOC_000306	Y44E3A.1	18.0895	11.3998	14.5252	19.7396	18.6862	13.5635	44.0145	51.9893
XLOC_000307	W05F2.7	0.80437	1.25299	1.83268	1.31805	1.3303	2.48269	3.89004	5.13104
XLOC_000308	W05F2.8	0.0864012	0.861145	0.534668	0.369603	0.0667508	0.117309	1.48221	0.553663
XLOC_000309	W05F2.6	36.0111	32.4903	14.8517	28.0971	23.8257	16.118	83.3531	68.0408
XLOC_000310	fbxa-203	6.88917	7.15599	6.19063	6.9435	7.50874	5.33556	20.2358	19.7878
XLOC_000315	cdk-2	18.5756	17.2479	17.0797	20.0712	13.9655	17.7464	52.9032	51.7831
XLOC_000316	K03E5.2	46.7222	46.3734	69.0958	40.2882	36.0331	42.6846	162.191	119.006
XLOC_000317	K03E5.1	1.01795	1.05312	0.559711	1.40218	1.47479	1.34538	2.63078	4.22235
XLOC_000318	tag-63	13.9694	11.6299	10.2512	12.4202	9.57862	9.88613	35.8505	31.885
XLOC_000319	msh-6	33.2723	32.0267	28.8232	30.195	25.8027	25.3953	94.1222	81.393
XLOC_000320	spg-7	75.2414	83.9918	109.869	68.3988	78.3434	126.356	269.102	273.098
XLOC_000321	Y47G6A.9	42.4249	41.812	48.3782	40.078	38.7706	50.342	132.615	129.191
XLOC_000322	crn-1	42.3345	45.6217	40.1753	36.1344	36.6402	40.1695	128.131	112.944
XLOC_000323	Y47G6A.7	17.0885	16.9732	30.5676	17.7694	16.788	29.5438	64.6293	64.1012
XLOC_000324	pcaf-1	8.96163	8.41906	10.278	8.93067	10.8653	11.5561	27.6587	31.3521
XLOC_000325	Y47G6A.5	15.4259	16.3828	15.7882	13.7098	16.7736	15.0239	47.5969	45.5073
XLOC_000326	Y47G6A.4	8.75946	8.02831	10.1045	8.6034	8.26829	9.6098	26.8923	26.4815
XLOC_000328	Y47G6A.27	1.85254	1.70351	1.19404	1.54959	2.09619	1.26763	4.75009	4.91341
XLOC_000329	Y47G6A.33	75.5427	43.3975	70.87	31.2213	33.3758	81.4244	189.81	146.022
XLOC_000330	Y47G6A.3	31.2892	24.8647	4.09368	29.0203	20.6882	2.07681	60.2476	51.7853
XLOC_000331	Y47G6A.31	0	0	0.902489	0.637984	0	0.534772	0.902489	1.17276
XLOC_000332	inx-22	16.3256	16.0686	7.23895	12.154	10.7757	6.42242	39.6332	29.3521
XLOC_000333	inx-21	18.9577	15.5974	17.8846	17.2804	15.1256	15.2615	52.4397	47.6675
XLOC_000334	Y47G6A.32	1.36172	1.85554	3.81161	2.7756	1.3212	1.76191	7.02887	5.85871
XLOC_000335	cah-6	4.7006	6.84239	5.58382	6.07163	4.42708	6.9135	17.1268	17.4122
XLOC_000336	T28F2.2	5.17527	6.21335	12.0444	6.19531	7.77293	15.0246	23.433	28.9928
XLOC_000337	T28F2.1	0.331254	0.576501	0.613068	0.436028	0.42963	0	1.52082	0.865658
XLOC_000338	col-51	0.0689074	0	0	0	0	0	0.0689074	0
XLOC_000339	D1037.1	12.3863	13.8217	11.9618	13.2493	13.0918	12.0344	38.1698	38.3755
XLOC_000340	hus-1	12.3948	12.862	13.4792	10.6091	11.6773	11.4814	38.736	33.7678
XLOC_000341	-	7.90805	5.45785	3.87275	5.37818	5.02217	4.28813	17.2386	14.6885
XLOC_000342	F21A9.1	1.15663	0.483479	0.964778	1.13064	0.678018	0.762075	2.60489	2.57073
XLOC_000343	glh-4	46.2142	42.4609	28.4668	39.8471	35.6712	23.5493	117.142	99.0676
XLOC_000344	T12F5.2	13.4281	15.5589	6.47554	13.6911	10.6909	5.31781	35.4625	29.6998
XLOC_000345	T12F5.1	14.6364	12.8025	10.8773	13.5305	12.3633	10.7185	38.3162	36.6123
XLOC_000347	math-46	0.84777	0.201238	0.249031	0.108698	0.218661	0.198042	1.29804	0.525401
XLOC_000348	asic-1	1.05062	1.3629	1.7595	1.03987	0.995973	1.24573	4.17302	3.28157
XLOC_000349	C32E8.6	0.203414	0.491011	0.56247	0.531459	0.326746	1.07255	1.2569	1.93075
XLOC_000350	C32E8.5	36.7862	34.5741	26.8398	36.0093	28.5271	26.2178	98.2001	90.7542
XLOC_000351	C32E8.4	71.4656	67.1493	9.31235	44.2468	59.3699	3.672	147.927	107.289
XLOC_000352	C32E8.3	60.5714	60.5819	91.8172	64.1595	73.9861	102.598	212.971	240.744
XLOC_000353	rpl-13	3396.79	3668.95	2849.95	3377.91	3258.76	3152.99	9915.69	9789.66
XLOC_000354	C32E8.1	3.54705	4.24182	0.73452	3.90014	3.36845	0.579881	8.52339	7.84847
XLOC_000355	npp-11	37.5177	36.6606	29.6668	36.176	35.954	34.3593	103.845	106.489
XLOC_000356	unc-108	204.22	203.726	219.268	196.382	204.858	230.521	627.214	631.761
XLOC_000357	F53F10.3	117.187	118.717	204.935	117.282	105.491	310.656	440.839	533.429
XLOC_000358	F53F10.8	11.7793	10.8344	16.8861	9.45205	8.44315	22.6994	39.4998	40.5946
XLOC_000359	F53F10.2	133.018	133.618	118.657	118.525	112.93	127.196	385.293	358.651
XLOC_000360	T03F1.11	158.819	178.939	214.049	246.11	230.878	114.031	551.807	591.019
XLOC_000361	pgk-1	146.481	154.927	264.971	148.595	165.706	290.772	566.379	605.073
XLOC_000362	coq-4	18.1606	18.6666	32.3123	18.1712	17.7539	33.7557	69.1395	69.6808
XLOC_000363	T03F1.1	65.5779	63.0346	55.4201	58.3775	59.6725	59.3108	184.033	177.361
XLOC_000364	C50F2.3	48.0135	45.7265	42.4993	47.4046	46.3617	43.7034	136.239	137.47
XLOC_000365	C50F2.2	11.1875	10.2472	8.23619	9.52572	8.5472	7.87339	29.6709	25.9463
XLOC_000366	C50F2.1	0	0	0.0940987	0	0	0	0.0940987	0
XLOC_000367	pbs-4	316.2	338.209	283.724	341.969	329.096	293.265	938.133	964.33
XLOC_000369	T21E3.2	6.39469	5.07624	0.99091	4.57476	2.58373	0.394377	12.4618	7.55287
XLOC_000370	egg-4	19.3855	16.04	4.23795	15.6183	11.688	2.86453	39.6634	30.1708
XLOC_000371	F47B3.4	24.1068	19.6224	2.97565	21.717	16.7258	2.01107	46.7049	40.4539
XLOC_000372	F47B3.3	0.661895	1.99752	0.326497	0.732267	0.734768	0.608346	2.98591	2.07538
XLOC_000373	F47B3.2	9.53322	6.8163	0.289583	6.41789	5.21164	0.107153	16.6391	11.7367
XLOC_000374	F47B3.1	19.7925	18.0146	5.50553	15.6632	13.6963	2.79691	43.3126	32.1564
XLOC_000375	aars-2	97.6281	99.3133	93.4008	98.041	97.5791	103.501	290.342	299.121
XLOC_000376	cpn-3	934.326	1002.36	1007.7	887.296	911.644	1043	2944.39	2841.94
XLOC_000377	F28H1.1	9.31536	6.9993	8.91679	5.80746	5.37142	9.70268	25.2315	20.8816
XLOC_000378	F55C7.2	0	0	0	0	1.34906	1.4865	0	2.83556
XLOC_000379	unc-89	40.8146	43.7338	31.5044	38.3775	36.3565	27.2684	116.053	102.002
XLOC_000380	C24G7.4	0.757337	0.236947	0.951514	0.612276	1.0488	0.295474	1.9458	1.95655
XLOC_000381	acd-1	2.13987	3.80046	7.61913	4.00836	5.05125	5.10185	13.5595	14.1615
XLOC_000382	C24G7.1	0.229606	0.179859	0.0792307	0	0.111428	0.189186	0.488696	0.300614
XLOC_000383	cyb-2.2	41.4023	34.3262	7.03565	30.4648	23.9785	6.50138	82.7642	60.9447
XLOC_000384	H31G24.3	9.38942	9.86949	5.59436	9.05124	8.06387	6.57667	24.8533	23.6918
XLOC_000385	H31G24.2	0.304395	0.199345	0.259504	0.14879	0.331491	0.329783	0.763244	0.810064
XLOC_000386	H31G24.1	0.747451	0.791454	3.03198	0.719296	0.723934	0.795618	4.57088	2.23885
XLOC_000387	lin-44	8.00319	7.87112	14.2739	8.00012	13.0848	16.5482	30.1482	37.6331
XLOC_000388	E01A2.2	82.8014	82.7108	60.7335	78.8487	76.6755	63.7503	226.246	219.275
XLOC_000389	E01A2.1	50.9037	44.2055	73.9813	55.3045	55.3368	78.6869	169.091	189.328
XLOC_000390	R12E2.14	1961.77	2154.06	242.691	1752.36	1632.12	57.2352	4358.52	3441.72
XLOC_000391	inx-16	81.0966	81.2734	68.0074	79.9517	96.7118	72.9798	230.377	249.643
XLOC_000392	inx-17	46.3923	42.8458	36.7671	40.9316	45.5828	42.9419	126.005	129.456
XLOC_000394	rpn-8	191.637	192.64	167.71	190.304	184.608	172.246	551.987	547.158
XLOC_000396	R12E2.2	38.4231	34.405	33.7901	36.3343	33.0197	31.3236	106.618	100.678
XLOC_000397	R12E2.1	12.3025	12.8607	11.7174	11.2373	10.0311	11.3507	36.8806	32.6191
XLOC_000398	ppw-1	71.2771	75.6609	49.2646	65.2527	69.9293	47.8198	196.203	183.002
XLOC_000399	cas-2	39.9025	38.9545	25.5624	32.5884	27.6343	20.8071	104.419	81.0298
XLOC_000400	C18E3.5	34.8185	35.4191	34.8404	33.2887	28.4076	22.6211	105.078	84.3174
XLOC_000402	C18E3.3	5.24884	3.69354	4.08637	4.98437	5.53375	4.91433	13.0287	15.4324
XLOC_000403	C18E3.1,C18E3.2	28.8439	30.6033	20.665	26.5751	26.4959	19.2553	80.1122	72.3263
XLOC_000404	nab-1	14.6209	16.7775	15.6581	16.9977	18.9098	15.2457	47.0565	51.1532
XLOC_000405	C43E11.5	37.1899	36.2248	12.0217	29.7474	29.5558	7.73665	85.4364	67.0399
XLOC_000406	tufm-2	62.716	63.6379	84.3343	59.1983	60.3231	96.0671	210.688	215.589
XLOC_000407	cogc-5	31.5731	30.6132	42.1041	36.035	33.5114	47.5447	104.29	117.091
XLOC_000408	C43E11.12,met-1	34.7655	39.5446	37.0062	35.9721	32.6419	36.3743	111.316	104.988
XLOC_000409	mus-81	20.3791	19.9185	22.1297	20.3527	19.9333	19.7005	62.4273	59.9865
XLOC_000410	acin-1	38.0593	38.6323	31.5704	36.568	35.4986	31.3492	108.262	103.416
XLOC_000411	Y47D9A.3	11.0268	11.8309	1.9918	10.4172	9.77278	0.629462	24.8495	20.8194
XLOC_000412	scpl-3	8.96729	7.91368	4.3314	8.83315	7.5718	3.78826	21.2124	20.1932
XLOC_000413	Y47D9A.1	94.2239	90.7722	216.817	133.534	128.897	200.461	401.813	462.892
XLOC_000415	acr-6,anc-1	21.003	20.3104	20.1968	16.9664	17.8432	24.8846	61.5102	59.6942
XLOC_000416	ZK973.4	10.652	9.17641	0.709909	9.99772	5.4736	0.281702	20.5383	15.753
XLOC_000417	pdp-1	32.3968	36.1726	42.6514	33.1424	29.4102	42.0994	111.221	104.652
XLOC_000418	ZK973.2	28.7897	28.9292	23.0523	25.7106	25.9041	20.5978	80.7712	72.2125
XLOC_000419	ZK973.1	34.3281	31.814	22.7723	30.1328	27.1834	19.866	88.9144	77.1822
XLOC_000420	T21E12.3,dhc-1	36.6746	34.882	30.7491	34.3557	33.3192	35.4494	102.306	103.124
XLOC_000421	T21E12.2,cgef-2	7.01286	7.89865	7.5216	7.82215	7.06962	7.8957	22.4331	22.7875
XLOC_000425	eif-3.H	118.068	117.525	92.5714	105.792	105.227	94.2979	328.164	305.317
XLOC_000426	eri-6	8.42763	11.2196	8.02879	7.53618	8.76265	7.27848	27.676	23.5773
XLOC_000427	gcy-28	36.4127	33.0653	36.514	30.2798	30.5881	40.3012	105.992	101.169
XLOC_000428	Y119C1B.12	0.320222	0	0	0	0	0	0.320222	0
XLOC_000429	Y119C1B.3	3.42995	2.43512	1.91275	2.54578	4.20486	3.1114	7.77782	9.86204
XLOC_000430	Y119C1B.1	18.9479	14.8619	1.65873	13.4272	11.4262	0.831349	35.4685	25.6847
XLOC_000431	D1007.15	7.22498	6.28499	8.20704	5.42681	6.27209	9.1619	21.717	20.8608
XLOC_000432	pqn-24	34.3585	35.7597	43.7244	38.3622	37.2927	45.3607	113.843	121.016
XLOC_000433	D1007.13	13.33	19.2584	1.40294	8.45079	6.01642	0.723221	33.9913	15.1904
XLOC_000435	rpl-24.1	3687.08	3934.54	3290.2	3670.57	3491.6	3584.23	10911.8	10746.4
XLOC_000436	D1007.20	0	60.7668	0	0	54.8534	0	60.7668	54.8534
XLOC_000437	D1007.10	11.6976	12.4615	14.1846	10.8779	10.6186	14.5841	38.3437	36.0806
XLOC_000439	D1007.8,eaf-1	48.4382	49.2001	43.7289	46.4692	48.8431	47.5288	141.367	142.841
XLOC_000440	C44E4.5	21.9545	22.1393	27.1407	21.8507	23.0595	29.8611	71.2345	74.7713
XLOC_000441	C44E4.8	2.84658	2.69482	1.68212	0.924884	1.18804	1.78386	7.22352	3.89678
XLOC_000442	C44E4.4	299.261	298.816	164.703	273.902	251.408	158.665	762.78	683.975
XLOC_000444	B0041.3	10.0681	10.1275	13.4484	13.2947	13.136	14.3101	33.644	40.7408
XLOC_000445	B0041.8	43.5743	40.3079	30.3112	40.2526	40.3808	28.6551	114.193	109.288
XLOC_000446	ain-2	53.5932	58.9739	61.3194	59.8034	59.3995	67.2434	173.887	186.446
XLOC_000448	B0041.1	10.1594	7.94459	3.86149	6.09136	6.28801	1.5303	21.9655	13.9097
XLOC_000449	unc-57	39.916	43.5588	43.3066	42.6256	36.9746	37.4279	126.781	117.028
XLOC_000450	T04D1.2	0.109904	0.112108	0.780219	0.325014	0.423738	0.866106	1.00223	1.61486
XLOC_000451	W09C3.4	30.7969	31.406	19.7221	27.9844	31.8045	18.4098	81.925	78.1987
XLOC_000452	W09C3.3	0.526602	0.867924	1.02525	1.56127	2.02896	0.939306	2.41978	4.52954
XLOC_000453	W09C3.2	11.8263	11.5163	2.28316	10.142	11.2451	0.645986	25.6258	22.0331
XLOC_000454	W09C3.1	10.4811	8.22343	5.75173	8.99529	8.83335	3.85709	24.4563	21.6857
XLOC_000455	C10H11.7,ugt-26	48.6397	37.6065	26.9673	28.4585	37.8838	32.3585	113.213	98.7008
XLOC_000456	ugt-27	0.278012	0.0718839	0.577332	0.0683118	0.268406	0.460004	0.927228	0.796722
XLOC_000457	ugt-28	18.9188	15.584	10.3649	14.3165	16.7476	12.7737	44.8677	43.8378
XLOC_000458	ugt-25	30.028	30.5916	19.3104	42.3135	33.9881	19.7396	79.93	96.0412
XLOC_000459	viln-1	19.4588	18.5922	13.9852	18.4699	17.4797	10.5898	52.0362	46.5394
XLOC_000461	M04F3.2	7.92823	8.83306	8.08071	7.1963	5.82718	6.93366	24.842	19.9571
XLOC_000462	rpa-2	119.294	117.483	83.4534	95.214	93.0187	81.0268	320.23	269.26
XLOC_000464	F54D7.6	584.217	585.143	574.756	606.503	612.179	646.352	1744.12	1865.03
XLOC_000465	F54D7.7	6611.53	6239.31	5682.1	6515.35	6430.6	6009.17	18532.9	18955.1
XLOC_000466	gnrr-1	1.21359	0.569133	0.614948	0.43731	0.640301	0.369312	2.39767	1.44692
XLOC_000467	F54D7.2	87.981	85.9178	79.8384	94.7478	104.219	88.4003	253.737	287.367
XLOC_000468	F57C9.6	1.02043	1.27608	2.41985	1.51255	1.79118	1.3606	4.71636	4.66433
XLOC_000469	htp-3	33.8651	32.447	22.5183	30.1918	27.417	19.9071	88.8304	77.5159
XLOC_000470	F57C9.3,F57C9.4,clec-90	24.9098	30.0609	23.4751	26.357	26.3251	22.7257	78.4458	75.4078
XLOC_000471	F57C9.1	25.6029	23.2024	35.5715	22.9678	24.7822	42.0699	84.3768	89.8199
XLOC_000474	F25F8.1	4.81643	5.74036	5.76154	5.10199	5.96144	8.799	16.3183	19.8624
XLOC_000476	F21F3.4	15.0347	9.8889	12.4276	9.51387	13.9569	15.1169	37.3512	38.5877
XLOC_000477	F21F3.3	23.8474	17.2902	13.7001	23.9452	23.12	7.41133	54.8377	54.4765
XLOC_000478	F21F3.2	13.2963	14.0874	2.58506	12.8529	10.9222	1.14822	29.9688	24.9233
XLOC_000479	pgal-1	66.4105	66.9456	113.431	79.4444	76.5831	94.2642	246.787	250.292
XLOC_000480	F21F3.7	9.78646	11.1618	20.9828	11.1842	8.57723	19.0156	41.9311	38.777
XLOC_000481	F28B3.5,acl-11	25.5124	17.0987	19.8344	21.8198	22.1901	17.6601	62.4455	61.67
XLOC_000482	F28B3.1,F28B3.4	19.088	19.4772	17.2945	19.1308	17.8181	18.7632	55.8597	55.7121
XLOC_000483	W03G9.3	13.9281	14.5864	10.1424	13.4954	13.0043	10.6204	38.6569	37.1201
XLOC_000484	W03G9.2	17.8206	18.5801	13.4403	15.6677	15.5005	10.4719	49.841	41.6401
XLOC_000485	W03G9.9	0.116527	0.120458	0.162224	0.228936	0.450063	0.128285	0.399209	0.807284
XLOC_000486	snf-1	33.8647	34.7513	31.7016	37.3383	37.2482	28.7764	100.318	103.363
XLOC_000487	W03G9.10	0	0	0	0.758604	0	0	0	0.758604
XLOC_000488	mes-3	20.0118	19.8147	24.8935	17.6987	20.1145	23.6039	64.72	61.4171
XLOC_000489	dom-3	17.4929	14.0406	17.2704	14.0541	12.9991	15.5071	48.8039	42.5603
XLOC_000490	sst-20	62.6733	57.3854	15.147	53.4655	44.1081	6.43302	135.206	104.007
XLOC_000491	F54C1.1	5.45117	4.60593	0.547201	2.58079	1.74922	0.834625	10.6043	5.16463
XLOC_000492	C46H11.6	10.3446	8.02434	0.987725	7.7934	7.54078	0.656711	19.3567	15.9909
XLOC_000493	lfe-2	38.0919	37.2611	46.9655	41.6811	47.5087	49.7148	122.319	138.905
XLOC_000494	C46H11.3	0.674093	0.349221	0.92846	0.652335	0.324847	0.366427	1.95177	1.34361
XLOC_000496	C46H11.2	24.6193	27.8152	9.62151	9.2279	8.18865	11.5457	62.056	28.9623
XLOC_000499	kin-32	6.46535	6.71149	7.32257	6.37759	5.54906	8.4656	20.4994	20.3922
XLOC_000500	C30F8.3	20.6995	21.9812	14.3428	23.7009	25.6236	11.1026	57.0235	60.4271
XLOC_000501	Y110A7A.20	0.479611	1.47786	0	0.918008	0	0.518056	1.95747	1.43606
XLOC_000503	use-1	23.3337	28.2716	28.6584	26.7368	24.9292	24.6301	80.2637	76.2961
XLOC_000504	aap-1	17.7461	18.0485	16.0607	19.6019	17.943	19.267	51.8553	56.8119
XLOC_000505	Y110A7A.9	25.5407	23.2127	22.42	24.4847	22.3284	24.5089	71.1734	71.322
XLOC_000506	Y110A7A.7,Y110A7A.8	67.1641	60.7583	44.4175	57.5756	58.8368	49.5354	172.34	165.948
XLOC_000507	Y110A7A.6	99.6649	92.487	118.232	96.7909	98.4479	131.185	310.384	326.424
XLOC_000508	mtm-1	24.0708	24.0426	22.8669	22.3159	22.579	23.11	70.9803	68.0049
XLOC_000509	Y110A7A.4	14.9781	15.902	51.6971	23.5296	23.1665	49.8174	82.5772	96.5135
XLOC_000510	unc-63	7.00854	6.31828	7.09379	7.55863	6.77977	5.86988	20.4206	20.2083
XLOC_000511	Y110A7A.2	0	0.371178	0	0	0.57537	0.261663	0.371178	0.837033
XLOC_000512	hcp-6	12.2828	11.8554	11.045	11.5936	10.0299	10.6561	35.1832	32.2796
XLOC_000513	npp-6,slx-1	45.6959	40.3769	37.8337	38.9637	39.314	37.5904	123.906	115.868
XLOC_000514	bro-1	0	0	3.63888	0.97086	0.646356	4.35054	3.63888	5.96776
XLOC_000515	fncm-1	6.43942	5.33086	6.50241	5.23484	5.7416	5.94716	18.2727	16.9236
XLOC_000516	pde-5	0.328897	0.485324	0.460159	0.230505	0.319276	0.52013	1.27438	1.06991
XLOC_000518	C32E12.1	18.3469	16.9669	1.10081	15.2889	13.6967	1.14458	36.4146	30.1302
XLOC_000519	B0261.4	69.4588	72.1945	63.8207	63.0064	68.7784	67.9821	205.474	199.767
XLOC_000520	let-363	24.8797	25.1213	24.7152	25.1279	24.3078	26.2392	74.7162	75.6749
XLOC_000521	B0261.1,B0261.9	25.5963	24.6792	27.4873	23.5872	23.112	25.4222	77.7628	72.1214
XLOC_000525	fbxa-145	3.15316	3.1276	4.0525	2.77693	3.22239	1.61618	10.3333	7.6155
XLOC_000526	aman-3	7.06252	7.85072	5.956	8.86031	8.99759	5.92634	20.8692	23.7842
XLOC_000529	F55A12.6	0.54031	0.190862	0.376494	0.528401	0.443387	0.299813	1.10767	1.2716
XLOC_000530	F55A12.11	3.46752	0	0	0	3.28338	0	3.46752	3.28338
XLOC_000532	F55A12.5	23.9764	20.8656	16.3674	23.9582	20.4648	15.5761	61.2094	59.9991
XLOC_000533	dhs-2	26.441	29.6262	31.1086	31.8353	34.1816	27.8038	87.1758	93.8207
XLOC_000534	F55A12.2,ppk-1	48.1266	47.257	53.6054	43.92	49.9732	66.9509	148.989	160.844
XLOC_000535	F55A12.1	44.4153	43.5045	24.0655	39.0068	33.6448	19.6783	111.985	92.3299
XLOC_000537	C24A11.1	32.5643	32.0278	5.36236	27.2901	27.4173	2.76308	69.9545	57.4705
XLOC_000540	F27C1.4	0.533357	0.568168	0.719407	0.25673	1.29782	0.854969	1.82093	2.40952
XLOC_000541	F27C1.3	16.1448	19.4472	1.87892	14.6399	12.6201	0.744006	37.4709	28.004
XLOC_000543	F27C1.2	100.997	95.0472	192.094	98.917	96.659	195.894	388.138	391.47
XLOC_000545	F27C1.1	148.002	132.713	6.17097	97.796	89.8849	2.29565	286.886	189.977
XLOC_000548	C09D4.3	51.1641	47.6134	9.55161	42.5707	38.1854	5.06688	108.329	85.823
XLOC_000549	C09D4.2	21.1087	17.3222	24.5332	24.8017	25.0475	27.9593	62.9641	77.8085
XLOC_000550	C09D4.1	29.2727	30.4744	25.992	31.6772	33.8918	30.458	85.7391	96.027
XLOC_000551	F59A3.2	16.2869	14.7443	8.97448	14.4161	12.8708	8.97848	40.0057	36.2654
XLOC_000552	F59A3.12	27.2375	25.2455	16.0253	22.9447	22.1258	14.2883	68.5083	59.3588
XLOC_000553	F59A3.13	7.6911	6.56107	1.49627	4.48597	6.46364	0.896426	15.7484	11.846
XLOC_000554	F59A3.1	7.17909	6.79907	31.8575	10.4746	10.5653	44.5081	45.8357	65.548
XLOC_000556	tom-1	15.4057	16.2863	22.1583	20.0065	16.8847	19.9984	53.8503	56.8896
XLOC_000557	M01A10.1	15.4997	14.0927	11.4644	13.6173	11.9891	8.3002	41.0568	33.9066
XLOC_000558	M01E11.3	9.46291	8.61973	6.16836	7.90755	7.28401	5.21902	24.251	20.4106
XLOC_000559	M01E11.2	37.54	37.8944	35.5189	34.8766	38.9494	33.215	110.953	107.041
XLOC_000560	M01E11.1	18.7745	17.1694	19.2778	17.5518	18.3245	17.5188	55.2217	53.3951
XLOC_000561	cey-2	540.092	528.397	100.372	387.462	306.247	76.3921	1168.86	770.101
XLOC_000562	F46F11.7	16.9646	17.1048	73.4168	25.2846	28.8471	97.8102	107.486	151.942
XLOC_000563	F46F11.1	33.9025	32.4753	25.4202	24.7867	24.689	25.8516	91.798	75.3273
XLOC_000564	M01A12.4	1.86997	0.770906	1.54591	1.82743	1.80101	1.2254	4.18679	4.85384
XLOC_000565	M01A12.3,col-53	2.85324	2.34717	4.80668	1.7918	2.17827	3.52348	10.0071	7.49355
XLOC_000566	ptr-10	0.771067	0.800771	19.525	2.90334	1.97597	33.4704	21.0968	38.3497
XLOC_000567	T19B4.5	29.407	27.9729	19.2505	24.1454	24.9583	18.1948	76.6304	67.2985
XLOC_000568	dnj-21	61.4496	54.7083	77.836	61.3534	54.5513	97.3818	193.994	213.286
XLOC_000569	T19B4.3	232.796	238.64	271.317	208.393	241.481	339.261	742.753	789.135
XLOC_000570	npp-7	50.6147	51.8923	33.7702	47.5309	40.6201	32.8098	136.277	120.961
XLOC_000571	T19B4.1	11.0378	11.2087	27.4206	13.7834	13.4919	37.387	49.6671	64.6623
XLOC_000573	lim-7	5.14992	7.88334	10.5475	6.33683	5.53535	4.37774	23.5808	16.2499
XLOC_000575	nhr-266	1.41046	1.55552	0.101191	1.63305	1.35637	0.362599	3.06717	3.35202
XLOC_000577	F56H1.6,che-14	42.2576	46.3825	76.315	50.0227	56.0231	82.6126	164.955	188.658
XLOC_000578	T22E7.2	1.8722	2.12308	1.83542	2.0716	3.50179	2.70707	5.8307	8.28046
XLOC_000579	T22E7.1	21.7339	19.4457	37.2338	21.944	17.644	36.4256	78.4134	76.0136
XLOC_000580	hil-5	218.328	228.745	152.161	204.581	173.443	124.03	599.234	502.054
XLOC_000581	rnt-1	0.401213	0.906259	1.19985	0.590212	1.09813	1.09929	2.50732	2.78763
XLOC_000582	srz-4	0.138789	0	0	0.138161	0	0	0.138789	0.138161
XLOC_000583	lin-35	17.194	16.759	18.1382	19.0216	18.5356	18.1372	52.0912	55.6944
XLOC_000584	obr-4	49.3891	45.1287	36.2636	45.1351	39.7994	40.7849	130.781	125.719
XLOC_000585	-	4.91412	3.34788	0	5.81253	1.56125	3.57579	8.262	10.9496
XLOC_000586	ceh-12	0.648746	0.341739	0	0.952214	0	0	0.990485	0.952214
XLOC_000587	col-54	9.45985	10.151	4.30516	12.5377	10.3384	3.08063	23.916	25.9567
XLOC_000589	F33D11.2	7.66122	7.47131	1.03911	6.93192	7.02156	0.493148	16.1716	14.4466
XLOC_000590	F33D11.1	8.62639	6.07322	1.3157	9.659	11.2575	0.696944	16.0153	21.6134
XLOC_000594	C34G6.5	17.702	13.277	9.19301	13.1242	14.3156	9.54933	40.172	36.9891
XLOC_000597	pgp-2	37.2464	39.1761	32.1942	42.8768	49.2457	35.5892	108.617	127.712
XLOC_000598	C34G6.3	43.1149	37.6329	9.4562	34.392	33.3118	6.49287	90.204	74.1967
XLOC_000599	tyr-4	24.1465	17.8063	49.399	18.3835	16.3061	89.4868	91.3518	124.176
XLOC_000600	C34G6.1	26.3512	26.222	19.4475	27.0547	29.7685	21.0114	72.0207	77.8346
XLOC_000601	B0207.5	0.112193	0.138551	0.0945738	0.102185	0.093501	0.0414584	0.345318	0.237144
XLOC_000602	air-2	25.8605	22.5833	11.5634	21.1157	18.2898	14.422	60.0072	53.8275
XLOC_000603	gpa-14	0.423678	0.217887	1.18398	0.745884	0.715596	1.26787	1.82554	2.72935
XLOC_000604	B0207.2	2.7582	1.51818	2.67987	0.740522	0.813401	1.79589	6.95625	3.34981
XLOC_000605	B0207.1	8.53981	8.89191	1.28944	7.7948	7.43178	0.748497	18.7212	15.9751
XLOC_000608	Y76G2A.1,Y76G2A.2	1.64639	1.28208	2.21566	1.1523	1.69979	1.58864	5.14413	4.44073
XLOC_000609	C06A5.3	17.8949	16.559	12.8494	15.7558	14.6383	13.1639	47.3033	43.558
XLOC_000610	sir-2.4	8.08343	8.29207	9.57706	8.88303	7.69165	8.29319	25.9526	24.8679
XLOC_000611	C06A5.2	16.8253	16.6109	4.21041	15.2221	16.5705	3.49922	37.6466	35.2918
XLOC_000612	C06A5.1,csn-2	65.52	64.6884	54.6661	63.8558	62.7619	60.6275	184.874	187.245
XLOC_000613	B0025.4	35.0012	30.2387	35.3034	29.8683	28.5535	29.7396	100.543	88.1614
XLOC_000614	vps-34	20.2441	19.0012	30.5113	22.1849	25.1014	31.444	69.7566	78.7303
XLOC_000615	C27A12.4	1.61217	1.54428	1.1501	1.06931	0.995865	1.27914	4.30655	3.34431
XLOC_000616	tag-146	16.1642	13.7016	11.4911	13.0927	13.4182	10.702	41.3569	37.2129
XLOC_000617	C27A12.2	20.8037	17.9153	14.8087	17.8427	16.3319	13.3912	53.5277	47.5658
XLOC_000620	mbd-2	20.9879	18.4589	24.1065	21.6132	20.2125	25.2766	63.5533	67.1023
XLOC_000621	haf-9	121.574	132.605	138.338	146.736	165.781	169.6	392.517	482.117
XLOC_000622	ZK484.1	898.686	915.567	957.428	920.735	943.885	1062.51	2771.68	2927.13
XLOC_000623	T27A3.4	313.939	300.791	34.2171	239.704	211.974	15.5876	648.947	467.266
XLOC_000624	ssp-16	173.367	142.19	36.731	120.152	119.762	17.3121	352.288	257.226
XLOC_000625	T27A3.8	0	0	0	0.861096	0	0	0	0.861096
XLOC_000626	T27A3.2	51.2826	55.8551	46.8257	56.1297	52.8941	48.8436	153.963	157.867
XLOC_000627	T27A3.1	73.867	72.2717	65.4857	68.2073	71.863	71.0581	211.624	211.128
XLOC_000628	F56F4.4,pept-3	23.5748	25.5692	7.2276	22.8169	21.219	5.45735	56.3716	49.4932
XLOC_000631	F56F4.3	6.41961	5.97256	0.900602	5.88045	6.3939	0.540513	13.2928	12.8149
XLOC_000632	ttr-55,ttr-56	3.49998	3.6379	0.801913	4.03698	3.10591	0.329803	7.93979	7.47269
XLOC_000633	ttr-58	0.365028	0.571525	0.253217	1.43475	0.531774	0.202165	1.18977	2.16869
XLOC_000635	T09B4.5	5.08343	3.93105	9.97301	6.20694	7.46501	9.73548	18.9875	23.4074
XLOC_000636	T09B4.19	0	0	0	0	4.13606	0	0	4.13606
XLOC_000638	T09B4.4	19.8943	16.6432	42.7679	22.0365	26.3663	49.9214	79.3054	98.3242
XLOC_000643	T09B4.3	8.37111	8.78256	1.21349	6.81445	8.37412	0.719777	18.3672	15.9083
XLOC_000644	T05E7.3,T09B4.1,T09B4.2	41.389	49.3911	36.7037	40.8803	44.4206	43.2435	127.484	128.544
XLOC_000646	T05E7.1	9.18908	9.44394	22.9241	24.6562	24.4031	20.6742	41.5571	69.7335
XLOC_000647	T08B2.14	0	3.83893	0	0	0	0	3.83893	0
XLOC_000648	T08B2.5	37.0717	38.571	34.5607	36.5978	35.9217	40.2508	110.203	112.77
XLOC_000649	T08B2.4	3.98514	4.21902	5.08712	4.3151	4.17704	6.32147	13.2913	14.8136
XLOC_000651	col-56	0.226848	0.483727	0.468878	0.88424	0.55416	0.248996	1.17945	1.6874
XLOC_000652	C48E7.7	211.623	205.76	21.6246	159.699	142.527	6.35814	439.008	308.584
XLOC_000653	C48E7.6,cof-2	5.32088	4.95957	5.43021	4.58249	4.79973	4.99424	15.7107	14.3765
XLOC_000654	C48E7.11	39.8183	32.4409	43.0231	34.5197	42.9321	46.5115	115.282	123.963
XLOC_000655	lpd-2	50.344	54.2623	31.3969	53.8989	49.881	27.4661	136.003	131.246
XLOC_000656	C48E7.2	44.3484	40.3753	28.703	38.4229	34.9798	28.8753	113.427	102.278
XLOC_000657	C48E7.1	47.4176	36.5962	198.295	50.5455	34.2499	306.306	282.309	391.101
XLOC_000660	C10G11.7	103.084	99.4465	99.9627	99.6062	96.3648	107.755	302.493	303.726
XLOC_000661	C10G11.6,pnk-1	81.2408	69.7242	61.2661	74.2451	77.2482	68.0022	212.231	219.495
XLOC_000662	srh-49	0	0	0	0	0.12945	0.149016	0	0.278466
XLOC_000663	srh-51	0	0.141564	0	0	0.132874	0	0.141564	0.132874
XLOC_000665	C10G11.1	8.23909	7.1087	1.50109	5.60951	7.25175	0.509857	16.8489	13.3711
XLOC_000666	F26B1.5	6.82513	4.91563	0.430945	6.60429	6.08789	0.907667	12.1717	13.5998
XLOC_000667	col-58	83.1744	96.0719	21.3235	81.4242	80.61	11.8909	200.57	173.925
XLOC_000668	srg-14	0	0	0	0.14216	0	0	0	0.14216
XLOC_000669	ima-2	110.109	108.257	91.303	89.3282	85.6196	82.3061	309.669	257.254
XLOC_000670	F26B1.2	152.162	151.3	86.5691	136.419	122.005	85.8414	390.031	344.265
XLOC_000671	F26B1.1	6.98097	5.38365	1.18168	5.27853	3.58526	0.466951	13.5463	9.33074
XLOC_000672	F26B1.8	147.154	129.345	8.96511	98.0796	94.2378	3.88698	285.464	196.204
XLOC_000673	bli-4	129.596	137.554	123.862	92.4243	85.1548	162.274	391.012	339.853
XLOC_000674	K04F10.3	28.4969	28.0506	24.4307	27.4363	25.3064	24.1408	80.9782	76.8835
XLOC_000675	K04F10.2	0.579577	0.994622	1.62245	0.949977	0.74663	1.00463	3.19665	2.70124
XLOC_000676	K04F10.1	6.39665	5.72118	11.1448	8.02898	5.71699	11.8877	23.2626	25.6337
XLOC_000677	K04F10.7	25.6402	24.4161	26.3955	23.2885	26.1007	26.5708	76.4518	75.96
XLOC_000678	ZC308.4	5.64746	4.12182	1.29739	2.14959	2.01394	1.16681	11.0667	5.33034
XLOC_000679	gld-2	49.3126	53.4687	29.9857	46.4931	41.0776	32.1172	132.767	119.688
XLOC_000681	cuti-1	36.3381	38.6448	320.886	77.6942	92.7688	395.35	395.869	565.813
XLOC_000682	san-1	17.1588	15.1868	14.5004	15.1521	14.8444	15.1098	46.846	45.1063
XLOC_000684	ncbp-1	45.5494	45.4822	33.5655	45.2732	43.0784	36.0755	124.597	124.427
XLOC_000685	snt-4	22.6282	27.2593	34.439	25.8739	25.3378	39.1055	84.3265	90.3172
XLOC_000686	npp-12	45.5603	44.2355	32.5016	42.4618	40.7244	36.0296	122.297	119.216
XLOC_000688	knl-2	20.2794	21.6766	17.6881	18.6571	16.2329	17.1048	59.6441	51.9948
XLOC_000689	K06A5.3	30.0421	25.1299	10.2645	21.4657	28.2505	5.8334	65.4365	55.5496
XLOC_000690	K06A5.2	140.711	123.008	12.3712	101.573	88.0545	4.27803	276.09	193.906
XLOC_000691	K06A5.1	25.8716	22.4914	21.7927	21.0666	20.6918	18.6136	70.1557	60.372
XLOC_000692	sulp-1	0.60072	0.623622	1.06979	0.531002	0.578545	0.792859	2.29413	1.90241
XLOC_000693	uri-1	27.6413	27.5039	22.643	26.2928	25.7149	19.5779	77.7882	71.5856
XLOC_000694	acdh-1	3296.25	3356.07	5104.57	3304.19	3890.63	5496.48	11756.9	12691.3
XLOC_000695	C55B7.3	49.2513	50.1977	23.7718	44.9349	43.7679	23.9627	123.221	112.665
XLOC_000696	gly-2	10.9599	9.91152	7.66104	9.28833	8.4853	7.00458	28.5325	24.7782
XLOC_000697	glh-2	35.7146	33.0345	13.0836	27.7714	23.4713	11.4985	81.8327	62.7412
XLOC_000699	T10E9.4	103.694	101.846	25.0486	85.0801	74.6782	15.5042	230.589	175.263
XLOC_000700	T10E9.3	148.47	175.096	12.7065	95.2779	76.4442	6.02804	336.273	177.75
XLOC_000702	T10E9.1,T10E9.2	32.6103	35.9493	27.0998	27.6514	33.6298	25.434	95.6594	86.7152
XLOC_000704	tre-1	52.5792	51.1972	57.5572	57.5872	59.8281	58.6679	161.334	176.083
XLOC_000705	xpg-1	16.3121	13.4319	15.1667	16.0298	13.8635	13.7097	44.9107	43.603
XLOC_000707	F57B10.5	221.355	213.876	219.277	242.41	258	223.341	654.508	723.751
XLOC_000708	F57B10.4	23.7216	23.894	18.207	22.0686	19.1761	14.9664	65.8226	56.2111
XLOC_000709	F57B10.3	157.911	167.223	335.108	152.07	158.376	340.595	660.242	651.041
XLOC_000710	let-607,try-6	68.5272	70.9938	70.0369	68.1665	66.5434	75.5019	209.558	210.212
XLOC_000712	D2092.6,F48A9.1,F48A9.2	18.3424	17.509	11.1784	18.4386	19.2624	9.74817	47.0298	47.4492
XLOC_000715	tsp-19	8.83747	9.72234	3.76029	6.61189	8.27077	1.17999	22.3201	16.0627
XLOC_000716	D2092.8	157.41	173.184	27.908	147.334	156.299	12.0869	358.502	315.72
XLOC_000718	ZC581.3	13.1074	12.299	5.56483	7.59154	6.60443	4.01948	30.9712	18.2154
XLOC_000719	ZC581.2	15.2609	17.4402	2.33291	13.0025	9.69805	0.971905	35.034	23.6725
XLOC_000721	nekl-2	11.7594	13.7171	16.7451	15.491	14.867	16.9513	42.2216	47.3093
XLOC_000723	C17F3.1	207.501	189.806	8.0435	121.854	96.6241	5.71285	405.351	224.191
XLOC_000724	C17F3.3	23.9663	22.6215	2.21611	18.5667	17.9685	0.413013	48.8039	36.9482
XLOC_000725	rmd-5	0	0	0.209756	0.147815	0	0	0.209756	0.147815
XLOC_000726	T23B3.2	77.6468	84.8602	40.4596	63.6311	60.2941	39.7713	202.967	163.697
XLOC_000727	T23B3.1	39.2006	40.1651	36.4599	36.2958	34.6689	37.3223	115.826	108.287
XLOC_000728	mec-6	1.81368	2.38375	3.57408	2.51748	2.63621	3.11715	7.77151	8.27084
XLOC_000729	W02D3.1,dhod-1	336.033	326.323	363.854	359.069	398.778	392.961	1026.21	1150.81
XLOC_000730	W02D3.12	103.232	81.6896	103.411	97.8321	87.4873	108.538	288.333	293.857
XLOC_000732	gpc-2	141.579	132.763	150.439	153.85	159.28	174.487	424.781	487.617
XLOC_000733	F08B6.1	23.5302	28.064	27.9377	32.645	26.2803	31.6842	79.5319	90.6095
XLOC_000734	cye-1	45.9727	49.1191	28.1727	40.5661	36.9727	23.3318	123.264	100.871
XLOC_000736	acdh-5	22.7664	19.2814	1.49321	14.9443	15.5384	1.08976	43.541	31.5725
XLOC_000737	pqn-20	18.5419	19.2964	14.5764	17.4646	16.6772	18.4721	52.4147	52.6139
XLOC_000738	E02D9.1	120.171	121.843	84.4532	115.126	104.43	92.8564	326.467	312.412
XLOC_000740	ulp-5	12.5221	11.8187	8.49788	9.98691	10.2671	8.94412	32.8387	29.1981
XLOC_000741	teg-4	41.186	40.5867	39.1478	40.8037	38.6747	37.1988	120.921	116.677
XLOC_000743	ahcy-1	2812.51	3104.02	2276.77	2666.37	2824.87	3375.46	8193.3	8866.7
XLOC_000744	dpf-3	64.9365	64.187	74.1175	58.7239	57.8916	73.6459	203.241	190.261
XLOC_000745	dpy-14	0.545564	0.236288	0.144881	0.624667	0.318792	0.342	0.926733	1.28546
XLOC_000747	syp-4	47.1082	43.9156	31.4894	40.4691	34.6132	27.042	122.513	102.124
XLOC_000748	rpb-5	134.81	141.09	88.7679	131.565	125.853	95.3732	364.668	352.791
XLOC_000749	H27M09.1	32.8254	32.3101	30.0071	29.8197	29.5893	27.4376	95.1426	86.8466
XLOC_000750	glh-1	359.301	353.125	219.389	315.861	276.45	195.543	931.815	787.854
XLOC_000751	T21G5.2,T21G5.6	21.1671	19.0423	16.9787	17.9523	13.9632	23.037	57.1881	54.9525
XLOC_000753	T21G5.1	12.8602	11.055	1.6618	10.4131	10.3257	0.764739	25.577	21.5035
XLOC_000757	C48B6.4	11.766	11.2154	1.5843	7.76139	8.53765	0.915007	24.5657	17.214
XLOC_000759	C48B6.2,C48B6.3	104.431	102.637	46.4304	91.88	85.5392	55.1795	253.498	232.599
XLOC_000760	ztf-4	45.4407	45.8728	29.4364	41.3706	34.6738	32.544	120.75	108.588
XLOC_000761	T10B11.2	42.5949	39.456	46.509	42.1466	44.1968	46.074	128.56	132.417
XLOC_000763	pcbd-1	42.8527	37.969	94.3061	55.5448	38.3345	124.714	175.128	218.593
XLOC_000764	C30F12.7	41.5881	38.6413	73.3676	44.4471	46.5801	66.3446	153.597	157.372
XLOC_000766	nmur-4	8.82691	8.46781	7.20328	10.5498	12.016	5.19671	24.498	27.7625
XLOC_000768	ctg-1	12.2045	11.7562	49.7914	14.452	14.6114	66.1433	73.7521	95.2067
XLOC_000770	F15C11.2	101.632	106.855	92.9365	97.994	96.1033	107.453	301.423	301.55
XLOC_000772	sem-4	10.579	11.8355	14.7768	10.6309	11.9191	17.0465	37.1913	39.5965
XLOC_000773	mdt-28	110.695	111.548	96.2644	119.688	114.518	123.016	318.507	357.222
XLOC_000774	cutl-6	0.438539	0.457764	9.37687	1.37959	1.28325	8.95702	10.2732	11.6199
XLOC_000775	W01A8.5	31.1917	32.988	24.7039	30.5268	24.2089	21.0858	88.8836	75.8215
XLOC_000776	nduf-6	241.337	235.253	319.988	220.143	240.309	324.108	796.578	784.56
XLOC_000777	ekl-1	35.6324	36.0728	34.4373	35.7434	33.3318	33.7565	106.142	102.832
XLOC_000778	F22D6.9	24.124	24.2314	12.9223	23.9592	24.074	9.98312	61.2777	58.0163
XLOC_000780	col-60	794.188	940.899	67.0951	606.267	531.721	10.0629	1802.18	1148.05
XLOC_000781	gly-18	0.519923	0.712276	0.72716	0.940625	0.836452	0.483393	1.95936	2.26047
XLOC_000782	gly-19	8.4317	8.27183	11.2638	10.0394	11.2707	10.4611	27.9673	31.7712
XLOC_000783	glr-3	0.0458398	0.0947515	0.254492	0.135064	0.177105	0.557895	0.395083	0.870064
XLOC_000784	taf-11.2	8.83047	6.71175	3.46595	5.57034	5.20761	3.26886	19.0082	14.0468
XLOC_000785	xpa-1	25.0131	22.3092	17.0172	22.2806	22.2466	18.5584	64.3395	63.0856
XLOC_000786	K07G5.3	0.232764	0.345119	0.397381	0.355152	0.273624	0.373849	0.975264	1.00263
XLOC_000787	K07G5.5	16.1702	14.651	21.9663	16.2703	20.576	22.2943	52.7875	59.1406
XLOC_000789	M05B5.3,trpa-2	18.0865	14.8717	10.521	16.8406	14.4363	6.30239	43.4792	37.5793
XLOC_000790	M05B5.4	18.1955	18.205	24.8109	19.8898	21.2119	15.9674	61.2114	57.0691
XLOC_000792	C01H6.4	15.1219	14.8359	20.0062	15.4188	17.0299	23.7385	49.964	56.1872
XLOC_000793	nhr-23	28.2965	29.0758	32.1881	29.3035	23.4942	46.2627	89.5604	99.0604
XLOC_000794	C01H6.6,C01H6.8,tag-298	40.9397	42.7585	84.192	47.268	61.1509	78.8095	167.89	187.228
XLOC_000795	R06C7.1	136.95	136.557	77.8938	117.512	100.858	64.483	351.401	282.853
XLOC_000797	cpg-3	59.1669	49.4224	5.0029	30.7456	22.6781	4.14364	113.592	57.5673
XLOC_000798	bub-1	48.5633	44.6593	38.1038	42.5153	37.6525	34.1513	131.326	114.319
XLOC_000799	ztf-15	13.0037	10.9824	9.2598	11.6482	9.43795	7.71718	33.2459	28.8033
XLOC_000802	ztf-2	1.61163	1.51941	24.2569	3.65208	3.91262	19.5747	27.3879	27.1394
XLOC_000803	F13G3.12,srd-53	8.17557	7.1956	6.40907	7.06422	7.60247	9.27227	21.7802	23.939
XLOC_000804	F13G3.7	24.7768	24.0779	24.8866	25.6813	26.9094	23.5847	73.7413	76.1754
XLOC_000805	F13G3.11	56.5221	54.6165	56.8083	64.5961	62.3485	74.8079	167.947	201.752
XLOC_000806	F52A8.1	257.763	249.236	447.007	277.727	289.738	507.946	954.006	1075.41
XLOC_000807	glb-18	4.95013	6.25579	4.42966	4.67753	4.72871	6.71729	15.6356	16.1235
XLOC_000808	F52A8.6	25.9707	24.0132	18.7232	21.2104	19.759	21.6136	68.7071	62.583
XLOC_000809	F07A5.2	111.862	101.667	10.593	83.5703	75.9214	4.31784	224.122	163.81
XLOC_000810	scav-6	23.316	26.4301	16.3362	15.2297	21.9991	12.4116	66.0823	49.6404
XLOC_000811	C15A11.2	29.9641	28.516	6.23623	27.4673	23.8421	2.67495	64.7163	53.9843
XLOC_000813	col-7	171.306	87.6385	0.919991	4.84325	9.21428	0.167629	259.864	14.2252
XLOC_000814	C15A11.7	3.55769	2.48055	13.7762	3.58958	1.45489	23.6894	19.8144	28.7339
XLOC_000815	unc-13	9.87316	9.76267	13.7127	12.059	13.9629	15.4151	33.3485	41.437
XLOC_000816	spe-4	46.1326	39.8454	17.9185	37.0881	34.9119	11.4883	103.897	83.4883
XLOC_000818	asic-2	0.221726	0.307557	0.40681	0.50696	0.286694	1.05244	0.936093	1.84609
XLOC_000819	T28F4.5	214.319	235.966	178.651	198.536	196.759	151.63	628.936	546.925
XLOC_000820	pbrm-1	26.1704	27.2761	28.0251	26.1455	27.1417	29.663	81.4716	82.9502
XLOC_000821	C26C6.6	24.3381	18.8774	2.39749	12.648	16.2542	0.473138	45.613	29.3753
XLOC_000822	glb-8	2.64321	1.0603	1.65753	1.83532	1.07484	1.78474	5.36104	4.6949
XLOC_000823	goa-1	89.1643	86.2934	93.1156	89.0023	90.941	98.3809	268.573	278.324
XLOC_000824	nas-36	37.9949	38.1879	13.1974	26.6818	21.825	13.2585	89.3802	61.7653
XLOC_000825	C26C6.4	0.785758	0.482673	0.315028	0.454115	0.43652	0.250953	1.58346	1.14159
XLOC_000826	T25G3.1	27.8022	25.2466	24.3842	28.5012	22.7885	21.6802	77.433	72.9699
XLOC_000827	T25G3.3,chs-1	112.129	100.83	61.6501	99.1843	89.8109	54.9099	274.609	243.905
XLOC_000828	T25G3.4	78.0888	73.5806	82.4797	77.947	73.7758	85.9901	234.149	237.713
XLOC_000829	D2030.2	24.7211	22.64	36.3489	22.944	21.1676	39.3787	83.71	83.4903
XLOC_000830	mce-1	59.361	56.3333	130.838	69.6983	76.9775	122.158	246.532	268.834
XLOC_000831	D2030.12	2.36204	3.54586	2.73626	2.55813	2.51178	3.88394	8.64416	8.95385
XLOC_000832	D2030.11,D2030.7,D2030.8	51.0806	53.7061	36.0842	47.2291	45.2889	51.6105	140.871	144.129
XLOC_000833	wdr-23	24.2637	25.3821	36.4739	25.3221	25.3933	37.8701	86.1197	88.5855
XLOC_000834	aex-1	5.4731	4.38863	5.40031	3.01618	3.53779	6.17103	15.262	12.725
XLOC_000835	lrp-1	19.5185	21.7456	56.9303	38.3948	40.9862	61.8573	98.1944	141.238
XLOC_000836	F26A3.5	41.3996	38.9742	8.62031	31.7204	29.6159	4.06869	88.9941	65.405
XLOC_000838	T24B1.1	53.4264	50.4432	47.7464	58.0271	57.7747	48.7069	151.616	164.509
XLOC_000839	T23G11.7	57.2676	52.6421	55.3083	51.7791	46.0695	51.9204	165.218	149.769
XLOC_000840	rlbp-1	16.4012	16.8072	18.7942	16.625	15.559	17.4649	52.0026	49.6489
XLOC_000841	T23G11.4	28.8119	27.232	35.2213	29.1068	26.2006	32.935	91.2652	88.2424
XLOC_000842	gld-1	257.583	258.531	81.8769	200.856	170.234	60.2286	597.991	431.319
XLOC_000843	T23G11.10	0.213607	0.659632	0.302747	1.04057	0.820455	0.957441	1.17599	2.81847
XLOC_000844	gna-2	19.4367	16.0155	8.28853	13.9953	12.7776	6.36986	43.7407	33.1428
XLOC_000845	T23G11.11	76.962	68.6271	104.28	89.193	103.894	75.5316	249.869	268.619
XLOC_000846	F27D4.1	313.599	324.49	479.774	310.504	342.798	523.785	1117.86	1177.09
XLOC_000847	F27D4.3	10.9791	9.47872	6.45497	10.1787	9.3396	7.04266	26.9128	26.561
XLOC_000848	F27D4.4	142.355	136.967	102.871	132.77	138.551	116.992	382.193	388.313
XLOC_000849	tag-173	170.919	176.596	164.094	160.045	159.022	183.778	511.609	502.845
XLOC_000850	F27D4.8	22.0947	23.1371	18.0528	19.0853	13.5142	24.329	63.2846	56.9285
XLOC_000851	F27D4.6	9.14746	8.08042	8.92342	8.66039	9.34645	8.11712	26.1513	26.124
XLOC_000853	F58H10.1	24.7652	22.1287	40.0308	43.5696	48.6373	8.73911	86.9247	100.946
XLOC_000854	adr-1	40.0808	40.3769	32.2686	36.9641	36.9533	35.1943	112.726	109.112
XLOC_000857	D2005.4,D2005.7,drh-3	67.2313	55.5043	41.6451	54.1906	52.6119	35.7969	164.381	142.599
XLOC_000858	F30F8.3	30.1172	29.3774	16.7897	22.1577	18.6615	17.6003	76.2843	58.4195
XLOC_000859	F30F8.9	48.7441	48.4539	55.7522	50.0769	48.3086	61.685	152.95	160.071
XLOC_000860	F30F8.10	34.7504	30.013	25.8852	24.668	29.1943	23.9556	90.6486	77.8179
XLOC_000862	taf-5	23.9202	24.4897	22.2526	23.8865	25.322	23.8852	70.6625	73.0937
XLOC_000863	apb-3	26.1319	28.4678	31.2611	28.1852	27.1474	31.3139	85.8608	86.6465
XLOC_000864	R11A5.4	425.066	437.43	913.809	393.417	448.553	1066.46	1776.3	1908.43
XLOC_000865	F55D12.1	1.80114	2.66195	4.326	2.35838	2.32594	7.05034	8.78909	11.7347
XLOC_000866	F55D12.2	41.4158	41.9089	18.0883	25.6259	24.6836	23.1707	101.413	73.4802
XLOC_000867	F55D12.3	0	0	0	0.222394	0	0	0	0.222394
XLOC_000868	F55D12.6	40.7572	35.6232	3.51228	30.6687	31.6048	2.08026	79.8927	64.3538
XLOC_000869	T22C1.1	43.2985	42.3315	31.2652	39.399	38.2633	31.2547	116.895	108.917
XLOC_000870	T22C1.3	31.9044	26.4261	29.6798	32.1482	29.3503	32.1783	88.0103	93.6768
XLOC_000871	T22C1.5	15.5706	15.1504	12.4279	12.619	14.1784	14.0576	43.1489	40.855
XLOC_000872	T22C1.6	46.8771	53.0345	46.2967	48.8535	50.3126	43.9194	146.208	143.085
XLOC_000873	T22C1.15	0	0.325915	0	0	0	0	0.325915	0
XLOC_000875	T22C1.9	34.7845	32.6238	4.36902	30.1014	29.0684	1.14151	71.7773	60.3113
XLOC_000877	rbg-2	16.7723	15.1382	16.0868	17.5258	17.6958	18.3904	47.9973	53.612
XLOC_000878	H05L14.2	6.01266	5.20488	2.43808	4.92302	3.92748	2.39969	13.6556	11.2502
XLOC_000880	C54G4.5	7.37696	7.27287	2.28384	7.64747	3.59519	4.98828	16.9337	16.2309
XLOC_000881	C54G4.2	10.6581	9.62762	1.77598	10.2679	8.89474	0.280706	22.0617	19.4433
XLOC_000882	C54G4.7,rskn-2	51.0155	47.9555	46.4382	49.0138	54.5387	52.3592	145.409	155.912
XLOC_000883	K04G2.2	41.2356	39.7312	27.0914	33.8824	35.4885	27.35	108.058	96.7209
XLOC_000884	K04G2.4	29.141	25.9012	1.75249	17.1053	17.4004	0.630339	56.7947	35.136
XLOC_000885	K04G2.6	21.5006	20.9169	23.7687	20.7046	21.2019	27.1106	66.1862	69.0171
XLOC_000886	K04G2.12	5.24491	8.57883	4.29768	11.0865	7.92299	1.13867	18.1214	20.1482
XLOC_000888	2015-04-01	11.6723	9.81433	13.8914	11.6951	10.5285	16.8666	35.378	39.0902
XLOC_000889	K04G2.10	0	0	0	0.0984827	0	0.224976	0	0.323459
XLOC_000891	rme-8	24.4294	25.4119	27.6123	26.2872	29.9533	33.3127	77.4536	89.5532
XLOC_000892	F18C12.3	37.7922	33.1407	23.8213	33.4353	33.9033	23.5769	94.7542	90.9155
XLOC_000893	spr-4	9.95637	10.8828	15.3571	10.9146	11.0742	18.0574	36.1963	40.0462
XLOC_000894	mau-2	22.8277	22.1353	12.6531	20.2715	18.0891	14.9332	57.6161	53.2938
XLOC_000895	T28B8.1	17.5851	17.9065	13.3665	8.89641	5.25699	14.315	48.8581	28.4684
XLOC_000896	ins-18	5.89374	7.07261	8.0558	6.32587	6.28584	8.07912	21.0221	20.6908
XLOC_000897	T28B8.6	23.7889	26.0303	4.29197	18.7994	16.904	1.8268	54.1112	37.5302
XLOC_000898	T28B8.3	0.551323	0.132893	0.39528	0.282558	0.0995051	0.302733	1.0795	0.684796
XLOC_000899	T28B8.4	4.53607	3.75327	0.42092	3.1916	2.68901	0.108587	8.71026	5.9892
XLOC_000902	H31B20.1	0.149259	0	0.40611	0	0.43049	0.641591	0.555369	1.07208
XLOC_000903	kcnl-2	2.79795	2.76206	4.94026	2.76296	3.11626	6.36407	10.5003	12.2433
XLOC_000904	T02E1.6	30.741	27.8148	3.73222	23.2911	23.7435	1.35132	62.288	48.3859
XLOC_000905	gla-3	33.9486	27.6992	11.8485	24.0464	22.2485	10.4379	73.4963	56.7328
XLOC_000907	T02E1.8	4.48208	4.63637	14.4281	9.4619	7.61013	14.5075	23.5465	31.5795
XLOC_000908	ZK265.3	56.6389	55.9252	3.91327	38.5886	34.997	1.55392	116.477	75.1395
XLOC_000909	ZK265.6	131.699	134.886	86.2373	130.417	133.026	68.5382	352.822	331.981
XLOC_000910	ZK265.7	10.6628	8.97461	21.2551	15.9484	14.0865	18.9756	40.8925	49.0105
XLOC_000911	T01G9.1,cutl-8	5.40796	7.18357	5.63696	7.49327	6.78292	3.11999	18.2285	17.3962
XLOC_000912	T01G9.3	1.29839	0.998759	2.73572	1.61879	1.48512	3.16823	5.03287	6.27214
XLOC_000913	mei-1	21.5529	19.3956	20.2859	16.3974	16.1553	19.4608	61.2344	52.0135
XLOC_000916	cep-1	18.895	21.7514	14.8617	18.637	15.3285	17.1362	55.5081	51.1017
XLOC_000917	C34B7.1	4.04053	3.23546	1.55787	2.43207	3.81501	0.52791	8.83386	6.77499
XLOC_000918	mys-4	10.5028	10.2454	8.67438	9.65406	8.54086	8.74812	29.4226	26.943
XLOC_000919	C34B7.2	15.5561	14.5882	18.7558	16.2293	15.8461	19.1291	48.9001	51.2045
XLOC_000920	tba-5	2.13572	1.29163	2.95253	1.13735	1.72581	1.56568	6.37988	4.42884
XLOC_000921	F16D3.6	0	0.156977	0	0.45529	0	0	0.156977	0.45529
XLOC_000922	ser-5	1.62836	1.44719	1.81978	1.81954	2.4759	1.19154	4.89533	5.48698
XLOC_000924	ngp-1	100.048	105.261	66.7366	100.502	93.4838	59.0953	272.046	253.081
XLOC_000925	T19A6.3,T19A6.4	75.6333	75.2225	110.276	85.0463	91.5518	102.157	261.132	278.755
XLOC_000926	F02E9.1	37.6913	40.4591	37.2494	43.0163	44.4369	42.0286	115.4	129.482
XLOC_000927	F02E9.7	15.9549	17.4643	20.9883	15.5297	15.0606	20.8554	54.4075	51.4457
XLOC_000928	sin-3	25.5906	24.4542	21.1081	24.3617	22.1388	20.6494	71.1529	67.1499
XLOC_000929	F02E9.8	0	0.630102	0.324866	0.462938	0.115988	0.386531	0.954968	0.965457
XLOC_000930	sod-2	147.453	149.671	195.94	155.322	149.677	205.338	493.064	510.337
XLOC_000934	unc-120	25.0969	22.5495	30.9977	21.5345	24.1976	25.1032	78.6441	70.8353
XLOC_000936	D1081.5	31.0782	25.8394	3.81407	22.4292	22.9433	0.696685	60.7317	46.0692
XLOC_000937	D1081.7	73.159	71.2302	36.6196	56.6105	51.3144	27.1273	181.009	135.052
XLOC_000938	D1081.8	70.6286	68.8243	49.6851	68.0996	65.04	52.6219	189.138	185.762
XLOC_000939	axl-1	4.65797	6.18869	1.93473	3.62074	3.46227	1.02042	12.7814	8.10343
XLOC_000940	K02B12.6	7.05269	6.0339	5.33551	4.16496	2.79579	5.39666	18.4221	12.3574
XLOC_000941	K02B12.9	3.20619	2.97501	2.78346	2.76408	9.4737	0.885739	8.96466	13.1235
XLOC_000944	ran-4	173.701	174.456	141.192	178.602	173.316	150.443	489.349	502.361
XLOC_000945	R05D11.5	95.3001	97.6516	96.2839	109.374	116.292	111.623	289.236	337.289
XLOC_000946	R05D11.4,R05D11.6,R05D11.9	79.0112	83.9582	65.3248	74.7511	80.9109	78.7244	228.294	234.386
XLOC_000947	R05D11.7	61.3055	63.0009	50.3036	64.5831	63.1074	46.466	174.61	174.156
XLOC_000948	edc-3	35.0816	32.7395	20.3299	28.2293	27.4244	20.5716	88.151	76.2253
XLOC_000949	F43G9.13	43.3723	40.0589	52.0445	47.0814	49.6529	54.909	135.476	151.643
XLOC_000950	F43G9.2	24.6158	27.0855	23.6883	23.9242	23.4138	22.4682	75.3896	69.8062
XLOC_000951	cfim-1	41.4859	44.2999	33.3551	36.3451	41.7061	31.2551	119.141	109.306
XLOC_000952	F43G9.8	6.69204	3.87247	1.0606	4.3054	3.62527	0.167669	11.6251	8.09834
XLOC_000957	ces-1	0.15362	0	0	0	0.149053	0	0.15362	0.149053
XLOC_000958	F43G9.12,sig-7,syx-17	29.3644	27.8553	29.4943	28.3415	28.7109	27.6304	86.714	84.6828
XLOC_000959	flp-22	54.0061	45.0914	69.0119	52.7625	55.8932	62.4938	168.109	171.149
XLOC_000960	mrt-1	14.4753	14.405	22.7409	13.653	12.6617	21.8824	51.6212	48.1971
XLOC_000961	F39H2.3	42.6864	39.0815	46.0472	42.8886	44.1725	38.1269	127.815	125.188
XLOC_000962	K07A12.1	49.1612	47.0916	53.5026	53.2148	49.5256	51.3482	149.755	154.089
XLOC_000963	asg-1	514.704	522.811	433.56	506.933	473.41	458.708	1471.07	1439.05
XLOC_000964	F39H11.1	39.3752	40.6305	31.0315	41.6539	41.778	33.7303	111.037	117.162
XLOC_000965	cdk-8	13.0535	13.607	13.3412	13.2117	14.5351	15.3859	40.0017	43.1327
XLOC_000967	rpb-3	69.1216	69.589	46.0693	64.8038	62.3174	45.4067	184.78	172.528
XLOC_000968	C36B1.14	29.1857	24.765	23.6892	26.84	32.6489	27.486	77.6399	86.9749
XLOC_000969	C36B1.6	6.76947	7.94026	8.43155	5.27236	7.95238	5.89541	23.1413	19.1202
XLOC_000970	dhfr-1,gls-1	54.3774	51.2757	42.1715	47.6949	50.6404	47.3079	147.825	145.643
XLOC_000971	imp-1	25.8719	23.9141	25.638	25.5213	22.5026	24.6431	75.424	72.667
XLOC_000972	lmn-1	145.777	147.751	98.1792	132.809	120.167	94.9174	391.707	347.893
XLOC_000973	trt-1	10.4684	9.48958	9.65668	7.19917	7.592	8.76774	29.6147	23.5589
XLOC_000974	F36A2.7	840.909	842.926	918.693	751.858	748.692	948.678	2602.53	2449.23
XLOC_000978	sup-17	21.4301	21.0979	23.8269	20.0923	19.0733	30.0346	66.3549	69.2002
XLOC_000979	F36A2.3	61.3987	52.2145	122.9	84.1878	83.816	158.466	236.513	326.47
XLOC_000980	phip-1	42.1264	48.2494	50.2611	41.5164	55.0003	55.8173	140.637	152.334
XLOC_000981	F36A2.9	48.7961	45.8093	36.6996	44.1497	45.6788	33.0422	131.305	122.871
XLOC_000982	F36A2.11	21.0149	15.8755	3.19171	16.3898	14.5342	1.25848	40.0821	32.1825
XLOC_000983	F29D10.1	14.2068	14.0342	1.88801	11.9601	11.2067	1.8683	30.129	25.0351
XLOC_000984	F29D10.2	12.8822	13.8729	0	2.34229	1.56712	0	26.7551	3.90941
XLOC_000987	F55H12.2	16.6034	13.1137	29.2253	10.4084	9.55857	60.9405	58.9424	80.9075
XLOC_000988	F55H12.5	28.3455	25.1873	1.80593	22.7917	17.4037	1.45455	55.3387	41.6499
XLOC_000989	snf-2	13.92	13.5475	1.41742	11.1139	10.3943	0.664964	28.8849	22.1732
XLOC_000990	F55H12.3	7.35044	7.53409	6.5221	7.89693	9.24348	8.8731	21.4066	26.0135
XLOC_000993	T08G11.3	0.789415	0.734243	1.32906	0.858171	0.849517	0.672723	2.85272	2.38041
XLOC_000994	tsp-15	9.59116	10.325	13.2301	8.30989	7.81539	11.6834	33.1463	27.8087
XLOC_000995	F53B6.7	16.3873	14.9991	3.05754	13.365	11.9651	0.728296	34.4439	26.0584
XLOC_000996	F53B6.5	0	0.249645	0	0.230828	0.460473	0.519834	0.249645	1.21114
XLOC_001000	gei-11	33.3494	29.6554	21.4043	28.8565	24.933	19.2506	84.4091	73.0401
XLOC_001001	mdt-31	27.9889	24.0169	26.7125	37.3303	31.3677	34.5364	78.7183	103.234
XLOC_001002	F32H2.10	20.542	19.9078	14.9338	18.8313	15.78	16.8651	55.3836	51.4764
XLOC_001003	thoc-3	26.7753	25.6083	28.3953	28.8117	26.7192	26.561	80.7789	82.0919
XLOC_001005	F32H2.8	0.64131	0.674498	1.48708	1.44941	2.51537	0.883844	2.80289	4.84862
XLOC_001006	tba-6	0.460406	0.619444	0.454588	0.514417	0.769413	0.505707	1.53444	1.78954
XLOC_001009	F36F2.2	10.2617	7.90302	11.6899	10.6055	10.466	10.5398	29.8546	31.6113
XLOC_001010	F36F2.1	26.8642	22.6481	42.811	26.7751	33.8367	27.3189	92.3233	87.9307
XLOC_001011	tax-2	0.493522	0.370449	0.312182	0.353244	0.173462	0.149365	1.17615	0.676071
XLOC_001012	C31H5.1	0.444405	0.458794	0	0.327421	0.431134	0.491882	0.903199	1.25044
XLOC_001016	C31H5.7	1.33339	0.464583	2.47642	1.73512	1.29489	1.96507	4.27439	4.99508
XLOC_001018	W06D4.2	66.4706	62.7195	16.5439	55.3968	52.4626	7.58587	145.734	115.445
XLOC_001019	W06D4.3	9.87428	10.6708	1.84189	8.39303	8.07388	0.305836	22.387	16.7727
XLOC_001020	snx-3	22.3802	26.6869	22.9937	22.9147	25.2984	23.9534	72.0608	72.1665
XLOC_001021	rad-54	12.9302	12.9646	11.1832	11.5037	12.4383	9.2691	37.078	33.2111
XLOC_001024	mef-2	9.811	9.0089	15.2978	9.90904	9.96975	15.3372	34.1177	35.216
XLOC_001025	gld-4	36.4802	38.57	25.6092	33.3461	29.4408	27.375	100.659	90.1619
XLOC_001026	ZK858.8	29.4571	25.9654	2.55939	23.4776	18.4869	0.69853	57.9819	42.663
XLOC_001027	mel-26	41.4677	39.1522	32.2355	35.3356	34.3056	34.5122	112.855	104.153
XLOC_001029	H32K16.1	12.4319	10.7924	4.68031	7.33677	7.33096	4.83373	27.9046	19.5015
XLOC_001031	F25H5.7	9.98979	11.0608	1.98189	9.08806	8.86797	0.821635	23.0325	18.7777
XLOC_001032	F25H5.10	33.8743	35.3604	91.6267	15.7712	31.8807	72.7573	160.861	120.409
XLOC_001033	eef-2	2106.31	2214.21	1705.84	2013.13	1902.04	1912.73	6026.36	5827.9
XLOC_001034	pyk-1	222.007	210.206	211.981	184.49	179.012	246.977	644.194	610.479
XLOC_001037	C45G3.5,gip-2	32.327	28.0209	26.2515	31.3827	24.2659	29.7015	86.5994	85.3501
XLOC_001038	F36H2.6	6.27416	4.6407	0.482443	4.44195	5.31855	0	11.3973	9.7605
XLOC_001041	prom-1	14.4875	14.8873	9.19206	13.4674	11.809	7.97049	38.5669	33.2469
XLOC_001042	rab-5	130.132	140.598	137.035	137.022	144.03	134.96	407.765	416.012
XLOC_001043	uev-3	15.2768	12.7462	16.2562	20.1129	19.737	17.4732	44.2792	57.3231
XLOC_001044	F26H9.8	7.13278	6.07886	2.05188	6.01006	5.70289	1.53412	15.2635	13.2471
XLOC_001047	C12C8.2	21.5694	19.552	55.3841	25.8067	21.5211	52.1439	96.5055	99.4717
XLOC_001050	dyf-5	0.812449	1.06294	1.15836	0.831718	1.29782	1.00519	3.03375	3.13473
XLOC_001052	F16A11.5	0.276416	0.0971827	0.384153	0.316936	0.225235	0.255006	0.757752	0.797177
XLOC_001056	C17E4.2	0.625286	0.601263	0.629773	1.01071	0.79394	1.56995	1.85632	3.3746
XLOC_001057	C17E4.4	15.2214	14.8468	10.9138	17.0032	15.6015	16.04	40.982	48.6447
XLOC_001058	C17E4.6	35.736	34.9722	29.4981	33.9901	28.5282	27.5808	100.206	90.0991
XLOC_001059	nkb-1	156.819	151.364	156.319	146.861	153.82	163.393	464.502	464.074
XLOC_001060	C17E4.10	16.392	20.933	16.5553	18.563	18.7284	19.696	53.8803	56.9874
XLOC_001063	F46A9.1	24.7898	23.9133	12.9201	26.5136	28.8312	8.15062	61.6232	63.4954
XLOC_001064	F46A9.2	15.2873	13.5931	1.48135	12.855	11.5716	1.17128	30.3618	25.5979
XLOC_001065	twk-29	3.1373	2.95125	3.153	2.41327	3.01525	2.29835	9.24155	7.72687
XLOC_001066	skr-1,skr-2	509.248	488.33	456.831	507.952	481.009	467.909	1454.41	1456.87
XLOC_001067	F30A10.14	17.2349	9.14846	0	2.99167	4.24361	0	26.3834	7.23528
XLOC_001068	F30A10.11	0	1.94054	2.50979	0	0	0	4.45033	0
XLOC_001069	F30A10.12	27.5277	27.5676	1.94688	20.8348	19.01	1.27956	57.0422	41.1244
XLOC_001070	F30A10.15	0	0	0.975477	0	0	0.388627	0.975477	0.388627
XLOC_001071	F30A10.4	0.0840813	0.0858895	0.119474	0.0828853	0.0810408	0	0.289445	0.163926
XLOC_001072	sac-1	68.7125	70.0214	60.4955	70.4443	71.9718	62.9444	199.229	205.361
XLOC_001073	F30A10.7	4.58007	4.47158	1.66296	2.89687	3.24817	1.05294	10.7146	7.19798
XLOC_001074	stn-1	16.3158	16.5487	21.2737	18.8989	18.394	20.481	54.1382	57.7739
XLOC_001075	usp-48	29.4171	28.517	19.4026	26.8338	24.528	18.8755	77.3367	70.2373
XLOC_001076	klp-16	29.0556	28.6683	16.0164	25.5053	21.2818	16.8224	73.7403	63.6095
XLOC_001077	set-32	6.4096	6.24519	5.08786	5.72375	6.64454	4.38748	17.7427	16.7558
XLOC_001078	ahr-1	0.533825	0.495438	1.21874	0.350134	0.574428	0.775446	2.248	1.70001
XLOC_001079	C41G7.13	0	4.05143	4.13311	0	2.63265	3.05903	8.18454	5.69168
XLOC_001082	C36F7.2	14.122	12.0398	8.24235	10.0617	9.01665	8.42366	34.4042	27.502
XLOC_001088	F42H11.1	4.23211	3.79072	0.390616	3.16202	3.0986	0.735415	8.41345	6.99603
XLOC_001089	dut-1	29.9886	26.2259	41.0767	24.3249	21.5132	34.1687	97.2912	80.0068
XLOC_001090	K07A1.5	28.1748	28.5246	1.16041	21.3797	19.3609	0.876868	57.8598	41.6175
XLOC_001094	aqp-9	12.2553	10.6061	25.044	14.8079	15.1041	23.6247	47.9054	53.5367
XLOC_001095	nra-2	144.065	148.077	127.977	150.662	148.451	142.187	420.119	441.3
XLOC_001096	T05F1.2	19.3566	19.7419	5.53891	12.605	11.7011	5.63518	44.6374	29.9413
XLOC_001097	hsr-9	60.3313	57.25	37.2221	51.5128	47.8377	36.2011	154.803	135.552
XLOC_001098	T05F1.4	27.5019	29.1064	32.35	27.4072	26.4098	29.7015	88.9583	83.5185
XLOC_001100	T05F1.8	40.7517	33.66	8.3293	31.8197	28.9292	4.31615	82.741	65.0651
XLOC_001101	T05F1.9	0.644714	0.658829	0.891519	0.420222	1.33554	1.17886	2.19506	2.93462
XLOC_001102	T05F1.13	6.30851	6.23628	6.6742	6.74108	8.84526	8.89292	19.219	24.4793
XLOC_001103	T05F1.11	3.53451	3.29613	7.65932	4.1236	5.04154	8.95169	14.49	18.1168
XLOC_001104	asfl-1	31.7306	29.8927	20.2831	28.9032	25.4206	17.6604	81.9064	71.9842
XLOC_001105	cel-1	21.0033	19.6999	21.6091	19.0195	19.8018	20.6822	62.3123	59.5035
XLOC_001106	rpl-24.2	215.884	213.032	132.316	217.792	194.858	134.639	561.232	547.289
XLOC_001108	ikb-1	7.46505	8.43672	11.4422	9.15942	8.79709	8.37647	27.344	26.333
XLOC_001109	rpl-14	3603.73	3694.2	3019.89	3647.72	3484.06	3222.09	10317.8	10353.9
XLOC_001112	eat-16	15.6596	14.9692	16.2082	13.2612	15.0689	19.7276	46.837	48.0577
XLOC_001113	ceh-5	6.36249	6.17976	1.31435	2.06992	2.75311	1.56887	13.8566	6.3919
XLOC_001116	F26E4.6,gfi-2	1353.04	1396.76	1584.63	1340.62	1373.75	1667.66	4334.43	4382.03
XLOC_001118	K02A11.2	3.27848	2.05925	1.76529	2.82701	2.96147	1.20116	7.10302	6.98964
XLOC_001122	sur-6	73.7542	70.6399	55.734	70.693	66.6358	61.6106	200.128	198.939
XLOC_001123	F26E4.7	7.41747	7.67952	10.0123	10.434	9.20581	10.5559	25.1093	30.1957
XLOC_001124	F26E4.12	82.2323	84.6676	69.8858	70.7424	84.1864	65.3355	236.786	220.264
XLOC_001126	cco-1	749.068	771.38	869.803	754.177	773.88	898.012	2390.25	2426.07
XLOC_001127	hrdl-1	47.2552	45.8816	46.2679	44.6038	41.5363	41.9889	139.405	128.129
XLOC_001128	F35C12.4	0	36.7977	0	0	0	0	36.7977	0
XLOC_001129	ncx-4	3.148	3.93209	6.73972	2.86383	2.51162	9.30445	13.8198	14.6799
XLOC_001131	nhr-62	3.23205	2.9905	4.16694	3.03523	3.67792	6.18322	10.3895	12.8964
XLOC_001132	zig-1	29.5407	27.2134	34.6082	31.9656	30.2639	33.8294	91.3623	96.0589
XLOC_001133	K10C3.4,K10C3.5	46.5069	44.9375	27.9852	38.9878	37.4202	27.291	119.43	103.699
XLOC_001136	nhr-49	52.3302	55.5129	58.6533	48.5515	49.0057	67.8114	166.496	165.369
XLOC_001137	inx-20	2.07292	1.43794	1.8204	1.79597	2.36577	1.45288	5.33126	5.61462
XLOC_001140	nas-5	3.73277	2.73229	1.246	1.83908	2.89511	1.72458	7.71106	6.45877
XLOC_001141	F52F12.18	0	0	0	0.3538	0	0	0	0.3538
XLOC_001143	lsl-1	43.0204	42.8964	26.3874	37.0614	32.4782	21.5092	112.304	91.0488
XLOC_001149	F52F12.8	20.9971	19.4191	2.04381	17.1182	12.3996	0.405201	42.46	29.923
XLOC_001151	F52F12.7,F52F12.9	26.165	23.6811	38.4443	31.1886	27.7318	43.3225	88.2904	102.243
XLOC_001152	Y106G6A.4	71.3657	63.1529	4.28235	53.9051	53.5552	2.87855	138.801	110.339
XLOC_001155	sqv-5	24.4848	22.3954	27.5837	21.3478	21.823	26.8857	74.4639	70.0565
XLOC_001157	mom-5	45.0238	41.5874	35.2189	43.1365	41.9864	33.872	121.83	118.995
XLOC_001159	his-68	15.6747	20.3508	4.56105	12.5992	12.6482	4.14399	40.5866	29.3914
XLOC_001160	T23D8.7	14.0304	12.7809	6.50248	11.2502	7.99374	4.93194	33.3138	24.1759
XLOC_001164	C03C11.1	48.1109	45.6243	4.23111	37.1979	26.3753	1.57154	97.9663	65.1447
XLOC_001165	fog-3	7.43124	7.91787	20.1099	11.5102	9.08478	23.0477	35.459	43.6427
XLOC_001166	F10G8.1	25.6107	23.0867	8.10667	23.5445	19.4951	4.81892	56.8041	47.8585
XLOC_001167	eak-6	0.093108	0.289767	0.214146	0	0.0906375	0.104333	0.597021	0.19497
XLOC_001168	npp-17	56.0121	60.6956	43.4361	55.9023	54.1699	37.9135	160.144	147.986
XLOC_001169	F10G8.6,F10G8.9,ercc-1	83.0252	87.3271	75.7053	84.6364	91.6717	90.5865	246.058	266.895
XLOC_001171	B0379.1	80.8624	78.0769	64.52	56.8431	68.1082	61.0458	223.459	185.997
XLOC_001172	mut-16	24.9235	24.3403	18.9989	22.813	20.9079	17.6369	68.2627	61.3578
XLOC_001177	Y106G6D.4	9.7062	6.55657	3.08451	6.63217	6.66138	2.7199	19.3473	16.0134
XLOC_001178	Y106G6D.8	80.9563	64.1775	58.2342	69.1377	67.9708	62.712	203.368	199.82
XLOC_001179	Y106G6D.7	21.9724	20.9991	19.0038	18.0839	19.1681	16.9833	61.9753	54.2353
XLOC_001181	F16C3.1	3.83118	3.22875	5.2874	4.16167	3.69518	6.07177	12.3473	13.9286
XLOC_001182	F16C3.3	1.62452	1.53926	4.46484	1.89552	2.39742	5.20539	7.62862	9.49833
XLOC_001183	F16C3.4	8.86103	10.8257	1.35072	8.10116	9.59733	1.42521	21.0374	19.1237
XLOC_001184	C25A1.1	27.285	27.3699	20.8683	22.7564	20.9101	23.7622	75.5232	67.4287
XLOC_001186	C25A1.5	62.0827	58.1972	77.9013	81.1726	82.0733	70.297	198.181	233.543
XLOC_001187	C25A1.6	400.372	399.495	315.664	404.946	370.289	315.568	1115.53	1090.8
XLOC_001188	iars-2	35.7083	38.4315	45.5551	37.9344	39.3676	52.7439	119.695	130.046
XLOC_001189	rsa-1	19.1521	14.6914	12.7242	15.9986	16.3866	12.1789	46.5677	44.5641
XLOC_001190	C25A1.13	45.7991	42.449	33.5678	43.5258	39.0646	47.5097	121.816	130.1
XLOC_001192	Y106G6E.2	0.329833	0.31677	0	0.239176	0.0758855	0.00577565	0.646603	0.320837
XLOC_001193	Y106G6E.3	1.12061	0.26556	0.00617485	0.780948	0.863001	0.0124487	1.39234	1.6564
XLOC_001195	lin-11	7.01007	5.87678	9.21377	7.6985	6.54358	13.8753	22.1006	28.1174
XLOC_001197	T20F10.8	0.19587	0	0	0	0	0.108873	0.19587	0.108873
XLOC_001198	T20F10.2	29.1929	29.508	44.3931	28.8963	32.6855	40.4371	103.094	102.019
XLOC_001199	T20F10.7	0	0	0.103616	0	0	0.0829893	0.103616	0.0829893
XLOC_001200	T20F10.6	0	0.0885843	0	0	0.0418345	0	0.0885843	0.0418345
XLOC_001202	Y106G6G.5	0	0	0	0	0.0123	0	0	0.0123
XLOC_001204	dlc-6	10.7077	14.4274	2.67274	14.3667	17.168	0.706616	27.8078	32.2413
XLOC_001205	Y106G6G.1	14.727	11.6904	2.66147	10.4119	10.5295	1.30573	29.0789	22.2471
XLOC_001206	rps-7	4465.66	4782.11	3955.67	4323.6	4153.56	4084.91	13203.4	12562.1
XLOC_001207	aph-2,ears-1	133.797	131.958	106.283	130.87	125.495	118.888	372.038	375.253
XLOC_001208	ZC434.7	43.2352	45.3135	63.6801	41.5302	49.3015	69.6863	152.229	160.518
XLOC_001209	ZC434.9	52.4374	49.3796	19.8374	48.378	46.1768	16.6151	121.654	111.17
XLOC_001210	-	3.12255	1.20233	0	0.27825	0.277547	0	4.32488	0.555797
XLOC_001211	sptf-1	7.68194	5.57007	7.18077	4.27556	4.27728	6.03485	20.4328	14.5877
XLOC_001213	F45H11.3	22.1033	21.5222	14.7197	19.2912	17.5011	13.4553	58.3452	50.2476
XLOC_001214	F45H11.5	186.254	164.882	214.55	201.263	179.177	223.648	565.686	604.088
XLOC_001218	tag-353	78.691	78.0477	66.7704	80.8917	79.6362	65.288	223.509	225.816
XLOC_001220	blmp-1	10.8051	11.6992	32.4579	20.5378	21.372	46.3114	54.9622	88.2212
XLOC_001221	Y106G6H.1	36.4176	33.6805	30.4187	32.8921	43.2654	42.1582	100.517	118.316
XLOC_001223	rpl-30	3686.6	4039.4	3358.26	3796.58	3616.73	3639.07	11084.3	11052.4
XLOC_001224	sec-8	20.2103	21.7151	21.0493	19.4954	20.4197	21.1466	62.9747	61.0617
XLOC_001225	Y106G6H.8	46.4056	45.0184	52.3655	47.4443	46.4556	64.0045	143.79	157.904
XLOC_001227	Y106G6H.13	123.49	103.739	12.7877	77.3749	69.6382	3.72187	240.017	150.735
XLOC_001228	Y106G6H.16	7.38316	7.31138	6.73939	7.1319	8.11656	8.8327	21.4339	24.0812
XLOC_001229	F37D6.3	0.89869	0.316791	2.45892	0	1.45862	0.971687	3.6744	2.43031
XLOC_001230	F37D6.4,tag-68	3.33979	4.80537	5.81717	3.90026	6.18462	4.86138	13.9623	14.9463
XLOC_001234	F59C6.8	2.67016	2.11174	6.41755	4.58769	5.60705	5.93203	11.1995	16.1268
XLOC_001235	F59C6.16	30.4487	9.40757	12.8477	26.3119	2.89993	37.3208	52.704	66.5326
XLOC_001236	exos-3	37.7212	32.9794	24.2792	37.3703	36.5794	25.8629	94.9798	99.8126
XLOC_001237	F59C6.5	366.675	378.798	492.492	385.881	398.9	499.517	1237.96	1284.3
XLOC_001238	F59C6.12	3.0737	5.89886	11.8433	6.88109	5.7194	10.4251	20.8159	23.0256
XLOC_001239	F59C6.2	22.3319	25.3816	6.74906	20.5662	18.6383	5.82625	54.4626	45.0307
XLOC_001240	F59C6.3	22.1255	17.0201	2.7052	19.9688	18.0422	1.4313	41.8508	39.4423
XLOC_001241	F59C6.14	20.9216	17.7124	20.5906	22.0443	37.4388	26.4229	59.2246	85.906
XLOC_001242	F59C6.11	12.0653	12.9392	10.6992	12.1453	21.8643	15.1838	35.7037	49.1934
XLOC_001243	F25H2.2	10.4311	8.97105	13.6518	8.80941	10.1266	11.7687	33.054	30.7047
XLOC_001244	F25H2.3	0	0.116417	0.155731	0.109723	0	0.369625	0.272148	0.479348
XLOC_001245	F25H2.4	69.6206	87.5263	58.138	71.5251	77.055	74.2962	215.285	222.876
XLOC_001246	F25H2.6	37.3944	42.315	33.839	37.9707	36.2184	34.6867	113.548	108.876
XLOC_001247	F25H2.7	11.0009	12.6403	14.487	10.4178	10.0645	13.5265	38.1282	34.0088
XLOC_001248	ubc-25	56.3132	54.6842	46.9249	49.4779	45.6946	45.1165	157.922	140.289
XLOC_001250	pas-5	271.153	273.08	242.231	293.976	272.17	248.736	786.464	814.882
XLOC_001251	rla-0	4135.66	4357.19	3334.41	4057.44	3907.41	3751.08	11827.3	11715.9
XLOC_001252	F25H2.12,rtel-1,tct-1	2553.11	2598.56	2226.69	2592	2576.13	2387.43	7378.36	7555.56
XLOC_001253	F25H2.14	26.1213	35.9871	0	29.1936	41.4506	0	62.1084	70.6442
XLOC_001254	F29C6.1	16.1309	11.0175	61.1148	19.0242	25.3056	72.2326	88.2632	116.562
XLOC_001256	lst-1	26.2427	23.2766	25.6399	25.2704	21.8071	20.6541	75.1592	67.7316
XLOC_001257	set-18	40.3294	42.0695	39.6853	45.6566	42.9632	38.7573	122.084	127.377
XLOC_001259	T22A3.6	4.00817	4.90301	0.327263	2.84596	3.98273	0.328872	9.23844	7.15756
XLOC_001260	pash-1	13.2363	13.3301	7.70456	11.1621	9.13884	7.65889	34.271	27.9598
XLOC_001262	lam-3	0.97732	1.01406	5.33477	1.78343	1.59961	8.52262	7.32615	11.9057
XLOC_001263	C43H8.2	23.2995	22.3576	22.0463	21.4726	20.1395	22.7674	67.7034	64.3795
XLOC_001264	B0511.6,C43H8.1	137.474	133.622	81.5715	130.383	118.724	78.0016	352.668	327.109
XLOC_001265	cutl-14	5.15367	6.34445	10.9709	7.28321	7.81087	11.5681	22.469	26.6622
XLOC_001267	tag-344	18.3064	18.7422	3.50844	16.7298	13.5063	1.4413	40.557	31.6774
XLOC_001268	fbxa-125	9.07685	8.4606	2.71251	6.02754	7.05173	1.31239	20.25	14.3917
XLOC_001269	B0511.2	0.353086	0.670939	0	0.294567	0.294586	0.166868	1.02402	0.756021
XLOC_001270	fkb-7	1.11985	1.04002	25.7368	3.79762	2.35959	39.3444	27.8967	45.5016
XLOC_001271	C34B2.3	18.5232	18.9638	4.92602	13.5434	13.8488	1.94934	42.413	29.3415
XLOC_001272	kbp-5	37.5185	33.0056	21.3243	36.4717	33.9275	22.4292	91.8484	92.8284
XLOC_001273	C34B2.11,tag-272	7.71716	5.50079	20.5007	12.4231	12.3477	17.9159	33.7186	42.6867
XLOC_001274	B0205.10	66.5019	65.8131	16.374	57.4138	50.3115	8.2191	148.689	115.944
XLOC_001275	B0205.9	12.0665	13.6339	10.682	10.6198	9.55284	10.3613	36.3824	30.5339
XLOC_001277	B0205.14	2.287	2.35124	37.4155	4.30351	8.61826	31.8924	42.0537	44.8142
XLOC_001278	B0205.12	160.974	209.48	291.328	182.758	221.027	250.477	661.782	654.262
XLOC_001279	kin-3	235.7	241.367	203.12	230.385	225.948	212.794	680.187	669.127
XLOC_001280	B0205.6	56.9227	58.7862	85.6008	64.6521	64.6419	86.0822	201.31	215.376
XLOC_001281	B0205.5	0	2.98939	0	2.70047	2.71821	0	2.98939	5.41868
XLOC_001282	daf-16	56.0175	55.805	56.8019	50.6225	54.1306	67.5224	168.624	172.276
XLOC_001283	F55A3.2,F55A3.3	70.5194	68.2052	50.6818	62.6435	53.4942	54.4714	189.406	170.609
XLOC_001284	C35E7.9,marc-6	49.1977	52.4094	31.5694	45.2847	45.8426	33.7726	133.177	124.9
XLOC_001286	C35E7.8	14.4739	14.673	15.5884	16.8439	14.8632	11.3473	44.7353	43.0544
XLOC_001287	C35E7.7	0.711446	0	0	0.345639	0	0	0.711446	0.345639
XLOC_001288	C35E7.6	8.82328	8.14222	12.7636	10.5236	8.80597	13.2871	29.7291	32.6167
XLOC_001289	C35E7.5	0.0926523	0	0.159146	0.0452845	0.0894289	0.11241	0.251798	0.247123
XLOC_001290	-	61.0695	26.6277	0	24.7626	28.6438	0	87.6972	53.4064
XLOC_001291	C35E7.4	2.88169	3.55822	2.72868	2.82981	2.51896	2.80815	9.16859	8.15692
XLOC_001293	C35E7.2	1.36526	1.98064	2.36944	1.08787	1.51224	1.47693	5.71534	4.07704
XLOC_001294	C35E7.11	5.38939	3.2256	5.86774	4.94557	5.08074	5.23934	14.4827	15.2656
XLOC_001295	vet-2	0.133328	0.0461457	0.24487	0.0868103	0.128611	0.680095	0.424344	0.895516
XLOC_001298	Y37F4.1	10.0704	9.89285	3.37546	9.67876	8.06091	1.10403	23.3387	18.8437
XLOC_001300	bath-25	0	0	0.268321	0.284169	0	0.106734	0.268321	0.390903
XLOC_001301	mop-25.3	10.5013	8.64734	6.4967	9.42636	7.56547	5.11666	25.6453	22.1085
XLOC_001302	T27C10.8	45.8626	44.4089	5.76206	36.255	32.7322	3.71351	96.0336	72.7007
XLOC_001303	srt-62	0	0.147197	0	0.140961	0.275492	0.158566	0.147197	0.575019
XLOC_001304	srt-61	0.131256	0	0	0	0.12595	0.437091	0.131256	0.563041
XLOC_001305	F49D11.4	0	0	0.22473	0.0783567	0.231473	0.178475	0.22473	0.488305
XLOC_001306	F49D11.3	1.02847	1.40757	2.37585	2.56058	2.09227	1.13775	4.81189	5.7906
XLOC_001307	F49D11.2	0.161935	0.249872	0.221399	0.0786115	0.0773924	0.175422	0.633206	0.331426
XLOC_001310	prp-17	37.3526	35.3699	34.3103	34.8652	34.4894	32.1591	107.033	101.514
XLOC_001311	Y95D11A.3	17.2811	13.6195	8.90838	14.7825	11.5254	7.65323	39.809	33.9611
XLOC_001312	Y95D11A.1	57.1002	59.4925	69.1863	61.4503	62.7018	78.3849	185.779	202.537
XLOC_001314	Y52B11A.3	17.5589	16.5958	15.0361	17.0858	16.2527	17.5848	49.1908	50.9233
XLOC_001316	Y52B11A.12	0	0.264862	0.179114	0.127575	0.124515	0	0.443976	0.25209
XLOC_001317	clec-92	0	0.388986	0.24353	0.349578	0.708425	0.192927	0.632516	1.25093
XLOC_001318	Y52B11A.8	8.96622	6.06335	6.59287	3.23696	2.68163	8.78389	21.6224	14.7025
XLOC_001319	Y52B11A.10	21.6436	20.9734	12.6824	22.5477	20.0848	11.8799	55.2994	54.5124
XLOC_001320	Y52B11B.1	11.4072	13.6374	28.882	35.2535	25.8323	7.66882	53.9266	68.7546
XLOC_001323	clec-94	0.175799	0	0	0	0	0	0.175799	0
XLOC_001324	clec-95	0.173177	0.367661	0.700861	0.333737	0.673064	0.185169	1.2417	1.19197
XLOC_001325	clec-96	0	0.255948	0	0	0.710362	0	0.255948	0.710362
XLOC_001326	clec-97	2.8438	1.26149	0	0	0.231511	0	4.10529	0.231511
XLOC_001328	ZK39.10	8.17401	9.6939	0.394421	5.5366	3.30855	0.623491	18.2623	9.46864
XLOC_001330	sri-5	0.469553	0.247648	0	0.410123	0.272181	0	0.717201	0.682304
XLOC_001331	ztf-6	5.57902	4.61891	17.981	6.61143	6.53769	23.0502	28.1789	36.1993
XLOC_001332	Y53H1A.2	19.4948	17.7802	13.8342	17.7563	15.8652	16.6448	51.1092	50.2663
XLOC_001333	nfya-2	10.0557	9.45483	7.7778	9.10089	8.63327	7.60086	27.2883	25.335
XLOC_001336	F46A8.11	2.96676	1.12914	2.78923	1.99641	2.76279	2.22882	6.88513	6.98802
XLOC_001337	F46A8.1	0.834891	0.699756	0.918567	0.991292	0.811541	0.552332	2.45321	2.35516
XLOC_001338	F46A8.9	7.02481	8.85096	2.33096	5.24791	4.49152	1.51109	18.2067	11.2505
XLOC_001339	scrm-6	19.664	18.2504	1.60935	13.6307	11.9161	0.703589	39.5237	26.2504
XLOC_001340	F36D1.7	7.84796	10.9756	4.25969	13.5746	11.9423	4.21559	23.0832	29.7325
XLOC_001346	F36D1.4	92.8007	68.1346	4.12084	47.0683	47.6402	0	165.056	94.7085
XLOC_001350	sru-47	0.280275	0	0	0	0	0	0.280275	0
XLOC_001352	Y53H1B.4	0	0	0.434162	0	0	0	0.434162	0
XLOC_001353	Y53H1B.6	0.28188	0.0441587	0.0205483	0.0273028	0.0366694	0	0.346587	0.0639722
XLOC_001354	cdk-9	24.416	23.5631	21.8902	22.1929	24.5875	21.9987	69.8693	68.7791
XLOC_001355	M04D5.1	0.0323223	0	0	0	0	0	0.0323223	0
XLOC_001358	F56G4.4	19.0858	18.1343	16.8399	18.7458	16.2007	14.9719	54.06	49.9184
XLOC_001359	png-1	23.9808	25.962	28.928	26.3155	26.9711	32.9275	78.8708	86.2141
XLOC_001364	Y53H1C.3	4.50367	3.58945	0.575703	3.16436	2.97221	0.100878	8.66882	6.23745
XLOC_001365	C27C7.7	0.0851872	0	0	0	0	0	0.0851872	0
XLOC_001367	nhr-244,nhr-74	1.60124	4.68358	18.2269	11.8827	12.3359	33.0513	24.5117	57.2699
XLOC_001369	nhr-259	0.343256	0.888177	10.7694	3.09945	2.35357	15.005	12.0008	20.458
XLOC_001370	C27C7.1	22.3335	20.7124	23.2941	17.5795	17.2209	20.4595	66.34	55.2599
XLOC_001371	ZK1025.1	1.44721	1.33963	1.20281	1.15187	1.38754	0.997877	3.98965	3.53729
XLOC_001376	bah-1	7.57662	9.56431	63.3594	28.0262	35.1229	59.0694	80.5003	122.219
XLOC_001377	ZK1025.8	30.5411	38.7685	172.736	95.528	115.598	151.381	242.046	362.507
XLOC_001379	nhr-245	0.76364	0.843818	17.7418	1.91214	2.1457	25.5473	19.3493	29.6051
XLOC_001380	K08C9.5	0.129856	0	0.35503	0	0.247796	0.707105	0.484886	0.954901
XLOC_001381	F32B4.8	0.165787	0.424874	3.38473	0.891276	0.940157	4.62059	3.97539	6.45202
XLOC_001383	F32B4.1	0.244222	0.169321	0.22552	0.0795497	0.0788694	0.179245	0.639063	0.337664
XLOC_001384	F32B4.6	0.128548	0	0	0	0	0	0.128548	0
XLOC_001385	F32B4.4	21.1199	21.3428	15.4208	19.6614	18.8115	14.977	57.8835	53.4499
XLOC_001389	F15D3.9	3.4285	3.44141	1.17184	1.60859	1.58063	0	8.04175	3.18922
XLOC_001391	F15D3.4	7.69372	7.85922	1.69516	6.82063	6.45307	0.628364	17.2481	13.9021
XLOC_001393	F15D3.7	125.561	130.637	200.393	115.434	105.325	237.409	456.591	458.168
XLOC_001397	C17D12.5	14.4731	16.132	3.51964	9.48992	12.4505	1.55367	34.1247	23.4941
XLOC_001398	unc-75	0.56436	0.477925	0.75113	0.354976	0.401724	1.1073	1.79341	1.864
XLOC_001400	C17D12.1	44.4878	47.4592	46.0131	45.4939	51.3222	52.6832	137.96	149.499
XLOC_001402	Y47H9A.1	0	0.128352	0.113123	0.0399879	0	0.089969	0.241475	0.129957
XLOC_001405	W04G5.3	0	4.44074	0	0	0	0	4.44074	0
XLOC_001406	W04G5.4	0	0.0710539	0.19201	0.272345	0.331874	0.153168	0.263064	0.757387
XLOC_001407	W04G5.5	0	0	0	0	0.178316	0.30944	0	0.487756
XLOC_001411	W04G5.13	0	0	0	0.28943	0	0	0	0.28943
XLOC_001413	W04G5.8	0.182678	0	0	0.0888784	0.0888211	0.100373	0.182678	0.278073
XLOC_001421	kpc-1	14.7084	16.8656	23.4013	19.2412	20.2169	26.1919	54.9753	65.65
XLOC_001422	F11A6.3	0	0.641569	0.561685	0	0	0.223375	1.20325	0.223375
XLOC_001424	pgrn-1	69.1882	70.173	66.2965	65.9603	74.47	81.0243	205.658	221.455
XLOC_001428	Y47H9B.2	8.92244	6.57038	1.1676	5.9594	4.58628	0.398231	16.6604	10.9439
XLOC_001431	T02G6.3	0.176712	0.187346	0	0	0	0.189557	0.364058	0.189557
XLOC_001432	T02G6.5	0.248078	0.176299	0.173131	0	0	0	0.597508	0
XLOC_001435	dhhc-2	16.449	17.3927	21.9621	19.8217	17.6309	19.1299	55.8038	56.5825
XLOC_001437	dnj-27	15.7502	17.9568	50.2564	26.0681	17.929	50.0447	83.9634	94.0418
XLOC_001440	Y47H9C.8	17.2755	16.7212	15.1048	17.0245	13.4661	15.8508	49.1015	46.3414
XLOC_001441	Y47H9C.12,fbxa-216	8.4022	6.87092	8.37972	6.54125	6.87504	7.06911	23.6528	20.4854
XLOC_001442	R09B3.6,Y47H9C.11	6.0157	5.57028	9.09119	8.44064	7.17688	7.68255	20.6772	23.3001
XLOC_001443	ubc-12	59.0618	63.4846	51.7525	54.9691	55.5466	58.4467	174.299	168.962
XLOC_001444	R06C1.4	951.159	986.971	1062.03	1075.87	1148.75	1298.44	3000.16	3523.06
XLOC_001448	R06C1.6	2.50629	2.76939	4.08115	3.15522	2.43094	4.54333	9.35683	10.1295
XLOC_001451	Y53C10A.1	14.1591	12.4581	5.85678	11.3473	11.9268	6.06889	32.474	29.343
XLOC_001455	rga-2	4.40838	4.68163	6.21728	4.25345	4.55709	6.53333	15.3073	15.3439
XLOC_001456	Y53C10A.5	47.1063	51.3279	37.143	43.6467	45.1257	45.5683	135.577	134.341
XLOC_001458	Y53C10A.7	6.74929	7.43242	10.4209	6.56913	6.94662	7.47309	24.6026	20.9888
XLOC_001459	Y53C10A.13,Y53C10A.14	6.28964	5.6808	4.95445	3.96199	3.36002	3.90105	16.9249	11.2231
XLOC_001460	abt-5	11.1029	11.2738	2.23425	9.49676	9.60727	0.905027	24.6109	20.0091
XLOC_001461	Y53C10A.10	5.52634	4.93545	0.305504	3.50168	2.68559	0.0969765	10.7673	6.28425
XLOC_001462	F58D5.6	3.61467	3.17714	0.926344	3.16428	3.31824	0.588485	7.71815	7.07101
XLOC_001463	F58D5.5	5.70012	5.34636	5.61269	4.55203	5.6922	5.64034	16.6592	15.8846
XLOC_001466	F58D5.3	0.987196	0.547985	1.53827	0.591518	0.507217	0.244848	3.07345	1.34358
XLOC_001467	Y47H10A.6	11.3658	13.4192	9.17623	13.3806	13.4738	5.52147	33.9612	32.3759
XLOC_001468	M01G12.8	0.0425581	0.0966875	0.038022	0.0753624	0.112508	0.143718	0.177268	0.331588
XLOC_001470	srw-111	0	0	0	0	0.123962	0	0	0.123962
XLOC_001473	sri-13	0.41743	0.502494	0.0961987	0.275388	0.458982	0	1.01612	0.73437
XLOC_001478	F15H9.1	4.49372	4.50858	0.226571	3.3948	4.67271	0.433413	9.22887	8.50092
XLOC_001479	F15H9.7	0.135856	0.143693	0.188459	0.268483	0	0.3007	0.468008	0.569183
XLOC_001480	R05D7.2	7.75222	7.31197	1.95464	6.51784	5.93323	1.2413	17.0188	13.6924
XLOC_001482	R05D7.5	16.1278	17.1456	13.8145	12.0168	15.081	15.0374	47.0879	42.1352
XLOC_001485	C15C6.1	108.886	125.511	94.8832	134.574	139.241	75.9266	329.28	349.742
XLOC_001486	C15C6.2	135.341	131.292	11.9011	93.2303	73.9674	2.77159	278.534	169.969
XLOC_001487	C15C6.3	17.3859	17.6275	15.5156	14.8962	16.2417	17.7843	50.529	48.9222
XLOC_001488	C15C6.4	21.1963	20.8421	19.3088	15.823	18.8306	12.7177	61.3472	47.3713
XLOC_001491	F14B6.6	4.78625	7.37431	5.22147	5.96677	6.13564	8.11631	17.382	20.2187
XLOC_001492	F14B6.4	0.70435	1.06565	0.833687	1.37826	1.08559	0.884737	2.60369	3.34859
XLOC_001493	oac-16	0.11061	0.116077	0	0	0	0	0.226687	0
XLOC_001495	oac-26	0.0533273	0	0	0	0	0	0.0533273	0
XLOC_001496	nhr-265	0.112033	0	5.47938	0.650565	0.326544	6.9726	5.59141	7.94971
XLOC_001497	F41D3.7	0	0	0	0.606849	0	0	0	0.606849
XLOC_001498	F41D3.15	0	0	0	0	1.34177	0	0	1.34177
XLOC_001499	F41D3.12	0	0.00521968	0	0	0.179965	0	0.00521968	0.179965
XLOC_001501	F56H6.13	0	0.129368	0	0	0	0	0.129368	0
XLOC_001504	F56H6.2	0	0	0	0.0918313	0.0917617	0.206944	0	0.390537
XLOC_001510	oac-36	0	0	0	0.108144	0	0.0607392	0	0.168883
XLOC_001512	C47F8.5	0.627089	0.880128	0.861687	1.11505	0.914216	0.456472	2.3689	2.48574
XLOC_001518	T09E11.11	2.91228	4.7983	3.02879	4.11852	2.94204	3.30466	10.7394	10.3652
XLOC_001519	T09E11.8	0.195342	0	0.0896761	0.128025	0.127499	0	0.285018	0.255524
XLOC_001522	oac-43	0	0.0606095	0	0	0	0	0.0606095	0
XLOC_001532	E03H4.4	1.5013	1.13833	0	0.805344	0.309498	0	2.63963	1.11484
XLOC_001533	E03H4.5	0	0	0	0.0779459	0.0762811	0	0	0.154227
XLOC_001535	oac-13	0.0550181	0	0	0	0.107544	0	0.0550181	0.107544
XLOC_001537	E03H4.11	0.0960486	0	0.133026	0.374386	0	0	0.229075	0.374386
XLOC_001540	C54C8.2	1.44909	0.904874	3.05731	3.12096	3.17947	2.43092	5.41127	8.73135
XLOC_001541	C54C8.4	0.361508	0.281224	6.61797	1.14612	1.31686	9.62274	7.2607	12.0857
XLOC_001544	C54C8.8	0.299953	0	0.204626	0	0	0	0.504579	0
XLOC_001546	gly-15	0.337454	0.261866	0.115402	0.575683	0.404488	0.091869	0.714722	1.07204
XLOC_001547	T27F6.4	25.7419	26.1937	15.7917	26.0028	21.1141	13.7467	67.7273	60.8636
XLOC_001548	T27F6.6,pars-2	69.087	58.3334	65.6309	53.9161	58.3092	75.0803	193.051	187.306
XLOC_001549	T27F6.7	15.5983	13.9849	14.5928	13.3896	12.8704	16.5539	44.176	42.8139
XLOC_001550	K11D2.1	4.12678	4.07078	3.78665	3.163	2.0788	4.08512	11.9842	9.32692
XLOC_001551	asah-1	21.6336	18.7369	41.8585	16.2574	12.9784	15.6846	82.229	44.9204
XLOC_001552	K11D2.4,K11D2.5,unc-101	44.4988	39.376	38.8602	36.8169	33.9573	39.891	122.735	110.665
XLOC_001553	W02D9.2	70.4949	74.093	61.781	63.4651	69.4997	62.4858	206.369	195.451
XLOC_001554	W02D9.3	9.03626	6.92742	6.0036	5.81025	5.61555	5.21732	21.9673	16.6431
XLOC_001555	W02D9.10	18.531	17.0979	26.2733	18.1696	20.71	26.5771	61.9022	65.4567
XLOC_001558	C49G9.1,C49G9.2	5.48743	3.62343	6.96379	6.0728	7.30773	10.9811	16.0746	24.3616
XLOC_001559	F33E2.4	1.96235	0.865821	7.70082	2.37598	2.41349	9.79299	10.529	14.5825
XLOC_001560	F33E2.7	0	0.383077	0.47773	0	0	0.380822	0.860807	0.380822
XLOC_001561	F33E2.6	0	0	0.0482623	0	0.0348826	0.0380115	0.0482623	0.0728941
XLOC_001563	T07D10.2	0.304948	0	0.136777	0.0989073	0.498423	0.435209	0.441725	1.03254
XLOC_001564	clec-13	0	0	0.20377	0.0964253	0	0.0539403	0.20377	0.150366
XLOC_001566	H16D19.3	0.318317	0.252442	0.0575274	0.0317478	0.251982	0.375739	0.628286	0.659469
XLOC_001567	H28O16.1	1303.1	1357.05	1606.78	1251.82	1255.12	1739.4	4266.93	4246.34
XLOC_001569	T26E3.6	0.878593	0	0	0	0.843955	0	0.878593	0.843955
XLOC_001570	T26E3.4	69.688	60.6095	52.4123	61.4608	65.8697	57.2986	182.71	184.629
XLOC_001571	par-6	27.4854	28.2545	27.2833	29.8904	28.8323	34.3434	83.0232	93.0661
XLOC_001572	ndx-1	11.898	16.3666	22.7118	15.2015	15.6212	24.9674	50.9764	55.7901
XLOC_001573	clec-103	0.16538	0.350721	0.66196	0.317505	0.47981	0.17425	1.17806	0.971565
XLOC_001576	sra-17	0	0.142983	0	0.13461	0	0	0.142983	0.13461
XLOC_001578	sra-18	0.270447	0.141626	0	0.534681	0.132074	0.298471	0.412073	0.965226
XLOC_001580	sra-20	0	0	0	0	0	0.142387	0	0.142387
XLOC_001587	T06G6.6	6.99283	14.1892	273.79	44.1984	44.3966	285.476	294.972	374.071
XLOC_001588	srw-88	0	0.122016	0	0	0	0.127908	0.122016	0.127908
XLOC_001589	T06G6.8	1.62875	1.72413	0.12131	0.960784	1.31484	0.095733	3.47419	2.37136
XLOC_001591	pfd-3	74.2289	81.1789	58.2585	75.3079	67.1824	64.0968	213.666	206.587
XLOC_001592	toe-4,uba-2	40.3455	39.4862	37.8807	33.3362	35.1587	43.7851	117.712	112.28
XLOC_001593	bath-34	2.59296	2.41557	1.31707	1.30133	1.73512	1.82233	6.3256	4.85878
XLOC_001594	bath-35	2.48103	2.85237	2.31505	1.80537	2.09746	1.84316	7.64845	5.74599
XLOC_001595	B0019.2	11.5751	10.7971	8.16173	9.52816	8.80272	8.17071	30.5339	26.5016
XLOC_001596	Y18D10A.26	0.157236	0	0	0	0	0.171184	0.157236	0.171184
XLOC_001597	Y18D10A.4,gsk-3,nhx-8	53.8442	56.781	49.08	54.0035	58.5455	55.8459	159.705	168.395
XLOC_001598	ptr-17	4.19813	4.4484	4.27881	7.29173	7.72487	2.08248	12.9253	17.0991
XLOC_001599	Y18D10A.8	22.6088	21.8295	39.5915	24.1869	23.5534	28.3289	84.0298	76.0692
XLOC_001600	clec-104	0.446666	0.318142	0	0.144515	0.146032	0.159463	0.764808	0.45001
XLOC_001601	pad-1	12.4197	13.4738	14.3122	13.2239	12.9392	15.3981	40.2057	41.5612
XLOC_001602	car-1	381.67	371.777	156.604	295.374	279.231	155.535	910.051	730.14
XLOC_001603	fkb-8	8.12951	7.30775	11.3117	6.5982	7.14615	8.87632	26.749	22.6207
XLOC_001604	fkb-2	765.959	835.282	632.975	751.603	681.924	732.362	2234.22	2165.89
XLOC_001605	pfn-1	288.335	271.543	201.039	238.243	214.924	185.539	760.917	638.706
XLOC_001606	Y18D10A.21	14.4066	14.2593	2.52594	9.11034	13.6217	0.92617	31.1918	23.6582
XLOC_001607	Y18D10A.22	1.06765	0.703527	2.42066	2.08486	1.96814	1.81064	4.19184	5.86364
XLOC_001608	tag-138	0	0.337566	0.14874	0.10583	0.104661	0	0.486306	0.210491
XLOC_001609	F08A8.2,acox-1	110.106	126.767	157.773	161.454	207.918	196.262	394.646	565.634
XLOC_001610	F08A8.3,F08A8.4	45.2243	46.0726	69.0459	62.2822	76.0559	78.1428	160.343	216.481
XLOC_001612	eif-6,gale-1	173.206	169.258	138.732	178.75	180.173	181.401	481.196	540.324
XLOC_001613	prx-11	19.9394	18.3853	23.1576	18.6595	21.0315	23.9709	61.4823	63.6619
XLOC_001614	C47B2.9,selb-1	42.8713	39.587	55.6985	48.5713	49.2078	63.5302	138.157	161.309
XLOC_001615	nlp-15	16.9547	15.2608	24.4378	22.4254	19.6815	24.4124	56.6533	66.5193
XLOC_001616	smu-1	33.9611	33.0632	25.3623	33.3463	33.2911	27.0142	92.3866	93.6516
XLOC_001617	pmr-1	22.0669	22.8209	23.7626	22.5123	21.2732	23.4101	68.6504	67.1956
XLOC_001618	W05B5.1,W05B5.4	51.9926	61.6014	60.1228	52.5978	55.2572	67.6612	173.717	175.516
XLOC_001619	npr-14	0.654921	0	0.364017	0.387509	0	0.291098	1.01894	0.678607
XLOC_001620	Y26D4A.2	0.328502	0.345567	0.185526	0.258856	0.454436	0	0.859595	0.713292
XLOC_001626	Y26D4A.20	0.190513	0	0	0.198887	0.191414	0.128858	0.190513	0.519159
XLOC_001631	Y26D4A.10	0.109321	0.111709	0	0	0	0	0.22103	0
XLOC_001632	Y26D4A.21	2.15076	1.92989	0.856075	3.26815	1.78955	0.676018	4.93673	5.73372
XLOC_001633	C17H1.3	0.0835527	0.0871363	0.114697	0	0.0805001	0.181452	0.285386	0.261952
XLOC_001635	C17H1.5	0.324412	0.0832449	0.795639	0.31461	0.155482	0.539197	1.2033	1.00929
XLOC_001639	C17H1.10	0.186427	0.0839598	0.262328	0.641143	0.236134	0.365296	0.532715	1.24257
XLOC_001640	F22G12.1	0.0810676	0.08398	0.341124	0.393345	0.392117	0.359605	0.506172	1.14507
XLOC_001641	F22G12.7,F22G12.8	1.0512	0.77262	3.0006	1.81114	1.39284	3.78456	4.82442	6.98854
XLOC_001642	F22G12.3	0.109192	0	0	0.214882	0	0	0.109192	0.214882
XLOC_001645	F22G12.5	12.8862	12.8474	10.7087	11.8831	11.4434	12.309	36.4423	35.6355
XLOC_001646	F17B5.1	2.6395	2.92953	13.9855	4.43379	4.45614	12.2118	19.5545	21.1017
XLOC_001647	F17B5.8	3.31352	3.46987	4.70353	5.18459	7.33296	7.1717	11.4869	19.6893
XLOC_001649	F17B5.4	0.149197	0	0	0	0	0	0.149197	0
XLOC_001650	F17B5.6	0	0	0	0.0938833	0	0.105965	0	0.199848
XLOC_001652	ZK1225.1	0.198404	0.103242	1.62165	0.483736	0.28824	1.93273	1.9233	2.70471
XLOC_001653	ZK1225.2	0	0.0775911	0.307487	0.292069	0.072042	1.30613	0.385078	1.67024
XLOC_001655	ssp-31	42.3171	35.7413	3.13318	31.0387	19.8559	2.89888	81.1916	53.7935
XLOC_001656	ZK1225.7	5.0066	3.41943	2.96273	4.34396	3.27907	1.79103	11.3888	9.41406
XLOC_001657	ZK1053.2	28.254	25.4639	2.97384	21.4289	18.637	1.57267	56.6917	41.6386
XLOC_001658	scrm-2	2.08727	1.90452	5.53595	2.78782	2.53174	4.9383	9.52774	10.2579
XLOC_001660	ZK1053.4,ZK1053.6	8.98911	9.82747	5.16478	8.58748	5.98322	1.79468	23.9814	16.3654
XLOC_001661	ZK1053.3	0.314763	0.245442	0.272032	0.268868	0.152137	0.0861584	0.832237	0.507163
XLOC_001662	F44F1.3	4.21891	3.78781	0.341952	4.8248	3.88797	0.136095	8.34867	8.84886
XLOC_001664	M01E5.1	1.25554	1.66553	0.57197	1.35741	1.27873	0.403357	3.49304	3.0395
XLOC_001665	top-1	61.0408	60.2354	53.381	58.8243	56.5899	55.359	174.657	170.773
XLOC_001667	Y40B1A.2,Y40B1A.3	11.7074	11.0774	11.9789	9.39247	10.7134	14.2448	34.7637	34.3507
XLOC_001669	T04D3.8	12.6762	8.72079	7.97067	9.75798	8.73922	6.67909	29.3677	25.1763
XLOC_001672	gcy-35	0.827002	0.657794	0.8055	0.950448	1.03881	1.01121	2.2903	3.00047
XLOC_001673	snr-2	269.395	277.733	178.21	241.939	216.794	171.872	725.338	630.605
XLOC_001674	Y40B1A.1,tag-210	278.08	278.471	254.858	267.312	265.196	254.524	811.409	787.032
XLOC_001675	C01A2.9	0	2.25488	0	2.05999	0	0	2.25488	2.05999
XLOC_001676	C01A2.6	0.262774	0.139301	0	0.25509	0.127957	0	0.402075	0.383047
XLOC_001677	C01A2.5	45.5059	44.3449	45.7755	43.0408	41.9052	47.6742	135.626	132.62
XLOC_001678	C01A2.3	87.7515	92.062	80.8589	81.1899	76.2645	94.9111	260.672	252.365
XLOC_001679	C01A2.4	39.899	37.4212	36.9039	39.5845	36.7675	36.1423	114.224	112.494
XLOC_001680	C01A2.2	25.547	24.6527	56.6925	36.2968	35.2904	70.0992	106.892	141.686
XLOC_001681	nlp-38	9.43056	10.0823	16.2621	9.2928	10.6907	13.8076	35.775	33.7911
XLOC_001684	W05H12.1	12.3851	11.338	14.6456	12.0518	10.0887	13.2557	38.3687	35.3962
XLOC_001685	Y40B1B.8	15.2686	15.9956	17.9043	16.5299	14.3608	19.5514	49.1685	50.4421
XLOC_001686	eif-3.J	113.118	115.077	70.6431	111.44	96.6719	90.2884	298.838	298.4
XLOC_001687	spr-5	18.0389	17.4899	15.0089	15.5418	15.983	18.5586	50.5377	50.0834
XLOC_001688	Y48G10A.6	15.6806	17.5441	28.2146	14.4522	19.3354	23.6702	61.4393	57.4578
XLOC_001689	rpr-1	8.70414	1.52869	5.92955	1.36392	1.38911	4.65518	16.1624	7.40821
XLOC_001690	Y48G10A.1	66.3	72.6238	79.2771	72.4071	72.7228	90.0397	218.201	235.17
XLOC_001691	ndx-8	5.08359	4.28855	8.4007	5.56483	4.00151	8.932	17.7728	18.4983
XLOC_001692	Y87G2A.19	18.0048	15.8767	54.1871	23.9889	22.0754	45.9254	88.0686	91.9897
XLOC_001693	Y87G2A.1	13.3038	13.1833	12.2883	12.8468	13.2476	11.8343	38.7754	37.9287
XLOC_001694	Y87G2A.2	31.9495	37.1289	27.9319	33.6785	41.0069	35.199	97.0103	109.884
XLOC_001697	Y87G2A.16	1.83552	1.99622	0.801049	1.41606	1.39901	1.05962	4.63279	3.87469
XLOC_001698	grd-15	6.76816	10.6411	2.04755	5.99203	6.59739	0.927115	19.4568	13.5165
XLOC_001699	Y87G2A.7	8.90283	9.77743	8.21933	8.10397	8.43151	7.63622	26.8996	24.1717
XLOC_001700	gpi-1	122.52	121.165	204.123	129.738	141.153	216.867	447.808	487.758
XLOC_001701	ubc-14	87.8073	79.2066	110.716	84.1792	93.8014	109.343	277.73	287.324
XLOC_001702	Y87G2A.12	0.0787034	0.123537	0.0539897	0.192959	0.0763395	0	0.25623	0.269298
XLOC_001703	unc-59	34.732	32.662	28.0633	33.9469	29.1199	26.2271	95.4573	89.2939
XLOC_001704	W09C5.3	0	0	0	0	0.13214	0	0	0.13214
XLOC_001707	W09C5.11	2.32805	3.1969	14.9102	6.63569	6.62459	14.3105	20.4352	27.5708
XLOC_001708	W09C5.7	24.9118	25.9717	22.0364	23.7161	23.5703	22.5705	72.9199	69.8569
XLOC_001709	W09C5.9	0	0	0.0166295	0.0337247	0.00753779	0	0.0166295	0.0412625
XLOC_001710	W04A4.5	21.4407	19.9465	16.2192	20.827	18.2957	16.2038	57.6064	55.3265
XLOC_001711	W04A4.2	34.4267	32.5543	4.55504	25.0533	19.2433	2.4591	71.536	46.7557
XLOC_001713	Y6B3B.3	0.475907	0.738335	0.20639	0.698554	0.286869	0.0984193	1.42063	1.08384
XLOC_001714	Y6B3B.2	0.930949	0.694165	0.199627	1.12174	0.75671	0.146881	1.82474	2.02533
XLOC_001716	Y6B3B.7	0.614132	2.11115	2.52194	1.18928	2.25124	1.66114	5.24722	5.10166
XLOC_001717	Y6B3B.4	9.16593	9.12704	8.74795	9.20847	8.27056	8.78982	27.0409	26.2689
XLOC_001718	Y37H9A.1	9.99424	8.80742	6.54591	10.4287	9.96131	8.28129	25.3476	28.6713
XLOC_001719	Y37H9A.3	18.1703	19.4342	19.1643	19.2883	18.8004	20.6387	56.7688	58.7274
XLOC_001721	Y37H9A.4	2.80161	1.2818	1.71251	1.79027	1.1909	0.675957	5.79592	3.65713
XLOC_001725	W09G3.5	2.79397	2.41285	3.25434	3.48282	2.77507	2.72472	8.46116	8.98261
XLOC_001726	W04A8.2	4.83444	5.17574	6.05179	3.46544	3.84189	6.07448	16.062	13.3818
XLOC_001727	W04A8.9	0	0.13325	0.710955	0.249674	0.617378	0.421931	0.844205	1.28898
XLOC_001728	W04A8.6	12.9596	13.4873	8.8343	13.6249	11.4913	10.3979	35.2812	35.5141
XLOC_001729	taf-1	11.9205	12.0573	10.5956	12.3065	10.3075	11.5714	34.5734	34.1854
XLOC_001730	Y71A12B.3	0	0	0	0	0	0.045866	0	0.045866
XLOC_001731	trp-4	0.600207	0.435852	0.654386	0.467841	0.529261	0.502283	1.69044	1.49938
XLOC_001733	clec-112	0	0	0.168029	0.120473	0	0	0.168029	0.120473
XLOC_001734	Y71A12B.8	0	0.0654661	0	0.0614355	0	0	0.0654661	0.0614355
XLOC_001736	rps-6	2602.57	2938.67	2195.92	2612.24	2548.18	2485.01	7737.16	7645.43
XLOC_001737	Y71A12B.10	0.578243	0.605383	0.498586	0.491935	0.492625	0.236346	1.68221	1.22091
XLOC_001738	Y71A12B.13,Y71A12B.14,Y71A12B.21	2.72938	2.97875	2.52989	2.70835	1.39223	3.14459	8.23802	7.24517
XLOC_001739	Y71A12B.11	0.108474	0.227439	0.148652	0	0	0	0.484565	0
XLOC_001740	Y71A12B.17	0.277305	0.290007	0.597893	0.465319	0.383541	0.34633	1.16521	1.19519
XLOC_001741	Y71A12B.15	0.0928045	0	0.127235	0	0	0.0504722	0.220039	0.0504722
XLOC_001742	Y71A12B.18	0.529387	0.514859	1.34804	0.713193	1.10553	1.46542	2.39229	3.28414
XLOC_001743	Y71A12B.12	2.61933	2.0282	4.55503	3.17271	3.58924	3.77215	9.20256	10.5341
XLOC_001746	ZC334.7	7.78604	7.57344	1.97997	9.68507	7.11413	0.226658	17.3394	17.0259
XLOC_001747	ins-29	7.51443	7.81863	50.6306	16.7686	11.9168	48.3011	65.9637	76.9865
XLOC_001748	ins-25	0	5.47277	0	10.134	4.9888	0	5.47277	15.1228
XLOC_001749	ins-27	153.085	180.296	277.916	188.477	170.343	343.215	611.297	702.035
XLOC_001751	F47G4.6	0.432345	0.450983	0.58883	0	0	0	1.47216	0
XLOC_001753	gpdh-1	20.254	22.0228	2.49745	11.7919	14.6954	1.49785	44.7743	27.9851
XLOC_001755	fbxb-101	0	0	0.340027	0	0	0.269445	0.340027	0.269445
XLOC_001757	tfg-1	134.539	153.33	121.709	140.504	144.786	141.805	409.578	427.095
XLOC_001758	Y63D3A.7	272.503	273.188	311.11	280.693	275.885	360.248	856.801	916.826
XLOC_001759	Y63D3A.8	21.972	23.35	18.4536	22.5526	22.6513	26.6122	63.7756	71.8161
XLOC_001760	mys-2	13.5604	13.22	11.4838	12.3818	12.7476	12.2047	38.2642	37.3341
XLOC_001762	fipr-22	0.171763	0.362426	0.57667	0.465194	0.289802	0.512468	1.11086	1.26746
XLOC_001763	fipr-24	0.408637	0	2.74737	0.785179	0.457918	3.03362	3.15601	4.27672
XLOC_001764	C37A5.7	3.18825	3.84421	10.5227	4.65347	3.66461	8.95837	17.5552	17.2765
XLOC_001766	C37A5.11	8.82745	13.5972	11.8036	4.14466	0	18.7355	34.2283	22.8802
XLOC_001768	ZK849.5	9.47893	10.0092	5.03751	9.57175	10.3818	2.54346	24.5256	22.497
XLOC_001770	ZK849.4	7.93681	9.98563	2.75784	7.70938	7.98655	1.02882	20.6803	16.7248
XLOC_001771	C49A1.1	0.129336	0.13474	0	0.12529	0.372906	0.282083	0.264076	0.780279
XLOC_001775	C49A1.5	0.0689372	0	0	0	0	0	0.0689372	0
XLOC_001779	K04H8.3	0.637706	1.57905	0	0.613251	1.23792	0	2.21676	1.85117
XLOC_001780	pes-7	24.4357	28.1085	23.2476	23.5136	25.0796	23.502	75.7918	72.0952
XLOC_001782	fbxb-67	0.233239	0	0.15963	0	0.113028	0	0.392869	0.113028
XLOC_001783	fbxb-8	0	0	0	0	0	0.278566	0	0.278566
XLOC_001784	F49B2.7	0	0	0.457985	0	0	0	0.457985	0
XLOC_001785	F49B2.3	0.095529	0	0	0	0.0933844	0	0.095529	0.0933844
XLOC_001786	F49B2.4	0.93344	0.780745	0	0.457223	0.455343	0	1.71419	0.912566
XLOC_001787	src-2	8.24614	9.05292	17.9008	14.1453	11.7934	17.4713	35.1999	43.41
XLOC_001788	F49B2.6	1.4281	1.37476	2.4538	1.1542	1.00126	1.57174	5.25666	3.7272
XLOC_001789	Y105E8A.3	66.5462	71.7503	67.8833	70.4303	73.7049	78.2971	206.18	222.432
XLOC_001792	eat-18	16.7305	18.4259	18.1743	19.0903	17.8398	16.9553	53.3307	53.8854
XLOC_001793	apg-1	44.6044	43.4882	42.1444	42.2388	46.9312	49.2608	130.237	138.431
XLOC_001794	Y105E8A.10	44.6142	44.6872	44.9349	51.6807	48.7279	61.1983	134.236	161.607
XLOC_001795	Y105E8A.11	77.4325	98.4217	122.248	91.7734	99.1736	124.553	298.102	315.5
XLOC_001798	Y105E8A.27	38.5574	40.9549	7.16478	35.213	30.7732	4.1784	86.6771	70.1646
XLOC_001799	ekl-4	24.3508	24.8219	22.2388	22.5	21.4181	22.0296	71.4115	65.9477
XLOC_001800	zoo-1	10.1126	10.44	13.9611	12.4566	11.456	13.522	34.5137	37.4346
XLOC_001801	Y105E8B.14	1.17648	0.247885	0.261812	0.415488	0.641372	0.157014	1.68618	1.21387
XLOC_001802	Y105E8B.7	4.13487	3.75889	8.08407	6.11237	5.33156	9.81693	15.9778	21.2609
XLOC_001803	bath-40	47.2975	48.3898	37.3872	43.4436	41.0952	36.541	133.075	121.08
XLOC_001804	riok-2	64.4036	60.9636	39.0256	57.4177	57.6423	35.2564	164.393	150.316
XLOC_001805	Y105E8B.5	161.723	179.712	104.729	164.647	188.751	121.744	446.164	475.142
XLOC_001806	Y105E8B.6,ero-1	65.0134	68.6135	57.0785	63.0858	67.4409	65.1924	190.705	195.719
XLOC_001809	Y54E5A.2	12.8088	11.7665	2.53256	10.9119	9.12032	2.13329	27.1079	22.1655
XLOC_001810	Y54E5A.7	11.3849	11.2524	13.2675	9.8156	10.3799	13.4819	35.9048	33.6774
XLOC_001811	Y54E5A.8	16.2138	16.5761	20.9727	16.5906	18.1916	21.9579	53.7626	56.7401
XLOC_001813	K05C4.8	0.901507	0.475419	1.23121	0.436622	2.18591	0.975235	2.60814	3.59777
XLOC_001814	K05C4.4	1.82195	2.03991	1.01862	1.76545	1.73943	1.07538	4.88048	4.58026
XLOC_001815	K05C4.7	28.9767	28.2565	21.2186	27.7919	24.2258	18.1129	78.4518	70.1306
XLOC_001816	hmp-2	20.401	22.3039	20.0925	21.2241	19.1107	21.3712	62.7974	61.706
XLOC_001817	K05C4.5	67.1516	65.3237	38.2634	62.8737	56.4368	37.4754	170.739	156.786
XLOC_001818	dnj-12	211.049	228.511	166.717	214.997	191.747	193.309	606.277	600.053
XLOC_001819	rps-26	3350.79	3495.23	2858.25	3230.06	3179.69	3189.54	9704.27	9599.29
XLOC_001821	uev-1	204.498	190.143	178.942	197.13	191.659	204.615	573.583	593.404
XLOC_001822	F39B2.1,K11B4.1	84.6165	81.7558	107.746	82.9793	86.1252	112.855	274.118	281.959
XLOC_001824	K11B4.2	16.0996	16.3184	17.7696	19.1516	16.5816	18.0755	50.1876	53.8087
XLOC_001826	smp-1	16.0067	12.076	18.214	14.252	13.0988	20.315	46.2967	47.6658
XLOC_001827	let-49	15.3082	15.8944	13.1265	13.3376	14.3105	14.2897	44.3291	41.9378
XLOC_001828	ubc-16	36.7742	35.0255	38.6382	35.3321	38.4406	37.3565	110.438	111.129
XLOC_001830	F32A7.1	0.140509	0.146283	0	0.13884	0	0	0.286792	0.13884
XLOC_001833	F32A7.8	0	0	0.391653	0.278813	0	0	0.391653	0.278813
XLOC_001834	F32A7.4	25.9415	24.1901	20.9393	22.0244	23.7747	19.8032	71.0709	65.6023
XLOC_001835	F32A7.5	63.7735	70.3451	65.5375	65.1448	66.8582	70.8309	199.656	202.834
XLOC_001836	str-245	0	0.530497	0.177023	0.126606	0.124353	0	0.70752	0.250959
XLOC_001837	F11C3.1	0.184099	0.85561	0.637236	0.361056	0.621032	1.21901	1.67694	2.2011
XLOC_001838	unc-122	2.63145	3.17648	2.37934	2.39648	2.4539	2.2493	8.18727	7.09968
XLOC_001840	ptr-23	82.7373	96.669	11.0325	49.8442	42.9079	10.2878	190.439	103.04
XLOC_001841	F21F12.1	0	0.251178	1.26964	1.14881	1.14816	2.01029	1.52082	4.30726
XLOC_001842	kin-1	87.6654	89.0769	79.6714	88.8866	83.3027	79.573	256.414	251.762
XLOC_001843	ZK909.3	300.042	332.764	154.926	284.147	255.695	109.603	787.732	649.445
XLOC_001844	ces-2	0	0	0	0.113342	0	0.251577	0	0.364919
XLOC_001845	ZK909.6	45.4312	36.2307	77.1799	35.6196	38.1196	95.1475	158.842	168.887
XLOC_001846	ZK337.2	3.70621	3.66216	5.52425	3.72159	3.79774	7.58594	12.8926	15.1053
XLOC_001848	tep-1	29.085	31.7942	49.801	38.9317	35.3729	73.7284	110.68	148.033
XLOC_001849	mtd-1	7.29426	7.64587	7.70952	6.24014	7.34968	11.2259	22.6497	24.8157
XLOC_001850	F33H2.2	19.9072	20.0017	16.3703	18.6825	17.6123	15.9101	56.2792	52.2049
XLOC_001851	F33H2.3	34.7895	35.4075	57.8274	39.6181	37.4454	53.1162	128.024	130.18
XLOC_001852	F31C3.2	28.4829	30.1033	22.9732	26.5782	25.6517	23.7328	81.5594	75.9627
XLOC_001854	F31C3.5	15.1474	11.4056	8.13108	14.0008	13.7875	10.1505	34.6841	37.9388
XLOC_001855	rrn-3.56	863.258	754.919	1096.07	1060.49	898.823	1252.04	2714.25	3211.35
XLOC_001856	rrn-1.1	526.754	411.573	600.868	452.332	520.277	787.775	1539.2	1760.38
XLOC_001857	rrn-2.1	5563.44	2570.59	1645.49	2170.14	2282.49	3158.32	9779.52	7610.95
XLOC_001858	rrn-3.1	1121.83	1054.93	1613.33	1536.49	1268.57	1845.61	3790.09	4650.67
XLOC_001859	rrn-1.2	652.767	525.785	755.556	563.786	666.056	1024.47	1934.11	2254.31
XLOC_001862	Y74C9A.3	39.005	34.5861	41.3009	37.6705	35.5185	44.0116	114.892	117.201
XLOC_001863	Y74C9A.4	22.6808	20.9165	16.4051	19.9173	16.7794	15.0189	60.0024	51.7156
XLOC_001864	sesn-1	26.6235	25.4092	26.5323	25.4944	25.1425	25.726	78.565	76.3629
XLOC_001865	Y48G1C.5	10.8459	10.034	0.784037	7.51731	8.4206	0.645441	21.6639	16.5834
XLOC_001866	Y48G1C.6	3.40871	3.70681	5.13619	3.58128	3.15994	4.54832	12.2517	11.2895
XLOC_001867	Y48G1C.13	11.0069	7.6104	8.34546	3.50965	9.28391	2.66102	26.9628	15.4546
XLOC_001868	Y48G1C.7,Y48G1C.8	24.701	23.8759	19.3111	21.0559	20.3213	17.6546	67.888	59.0318
XLOC_001869	rab-11.1	571.036	623.068	635.655	611.431	601.322	667.881	1829.76	1880.63
XLOC_001873	F53G12.11	0	0.540444	0	0	0	0	0.540444	0
XLOC_001874	bli-3	15.0769	16.1356	12.7335	16.5859	15.0409	17.3167	43.946	48.9435
XLOC_001875	ptr-11	30.5529	33.4686	55.258	49.5167	51.5962	58.4118	119.28	159.525
XLOC_001877	F56C11.3	15.5961	17.4003	48.6988	14.3312	18.3899	46.1664	81.6952	78.8875
XLOC_001878	Y48G1BM.8	13.0805	10.9814	7.41204	8.62757	8.92934	7.13017	31.4739	24.6871
XLOC_001879	Y48G1BL.4	6.17973	5.3904	9.64735	10.2273	17.3681	9.55087	21.2175	37.1463
XLOC_001880	Y48G1BL.5,Y48G1BL.6	3.40145	6.14697	2.04189	4.08957	3.00441	4.15117	11.5903	11.2451
XLOC_001881	Y48G1BM.6	0.511019	0.4888	1.94781	0.446314	0.457777	1.08218	2.94763	1.98627
XLOC_001883	Y48G1BM.9,Y48G1BR.1	48.7085	60.0472	24.6997	34.9573	34.2051	34.1033	133.455	103.266
XLOC_001885	ztf-3	6.72488	5.37649	6.75151	4.2779	4.73241	6.41161	18.8529	15.4219
XLOC_001886	C53D5.5	11.2183	10.7245	28.9837	15.9047	17.8756	32.8322	50.9265	66.6125
XLOC_001887	imb-3	215.243	220.234	116.799	193.299	172.039	120.14	552.276	485.478
XLOC_001888	xpo-2	44.0529	42.6943	30.3364	37.4223	33.709	30.3659	117.084	101.497
XLOC_001889	mbtr-1	6.29357	4.8751	5.93576	5.17745	5.11889	6.97179	17.1044	17.2681
XLOC_001890	R119.1	4.43477	3.89736	3.90355	3.75605	3.58912	3.8865	12.2357	11.2317
XLOC_001891	R119.2,R119.3,pqn-59	300.971	315.039	270.655	285.025	267.794	285.664	886.665	838.483
XLOC_001892	R119.5	2.66144	2.92997	5.59659	2.72169	3.23072	6.70403	11.188	12.6564
XLOC_001893	Y50C1A.2	0.544298	0.565331	0.502663	0.354175	0.878295	0.299341	1.61229	1.53181
XLOC_001894	W04C9.5	0.463514	0.57962	0.756786	0.539979	0.806707	0.898299	1.79992	2.24498
XLOC_001895	W04C9.6	0.22658	0.357944	1.00696	0.779018	0.541751	1.36024	1.59148	2.68101
XLOC_001896	Y65B4BL.3	9.09439	9.63208	9.31459	8.75682	6.64227	7.57312	28.0411	22.9722
XLOC_001897	Y65B4BL.4	22.4377	18.8869	9.92896	15.3079	14.1666	8.16198	51.2536	37.6365
XLOC_001898	Y65B4BL.7	5.33496	6.99058	4.07542	6.99329	6.63102	4.09844	16.401	17.7228
XLOC_001899	acs-13	74.1349	76.4256	65.2293	90.9739	99.2966	78.9391	215.79	269.21
XLOC_001900	Y65B4BL.6	131.531	135.395	59.6443	155.037	166.648	28.3816	326.57	350.067
XLOC_001904	ceh-9	0.355396	0	0	0.683342	0.682736	1.16337	0.355396	2.52945
XLOC_001905	grl-16	1247.7	1485.76	274.119	1166.78	1117.84	103.174	3007.58	2387.79
XLOC_001906	F56A6.5	0.188441	0	0	0	0.366197	0	0.188441	0.366197
XLOC_001907	hum-7	7.86407	8.56865	7.0168	7.25229	6.62233	6.19292	23.4495	20.0675
XLOC_001908	F56A6.4	21.7738	19.7724	13.6875	19.4655	16.3943	11.1991	55.2337	47.0589
XLOC_001909	Y65B4A.6	58.2072	58.1972	45.6698	55.7106	53.2213	44.6355	162.074	153.567
XLOC_001910	Y65B4A.7	6.2677	6.52205	0.818284	5.47184	6.34257	0.324046	13.608	12.1385
XLOC_001911	Y65B4A.8,Y65B4A.9	32.868	34.1469	27.2837	30.1373	27.0471	28.4075	94.2986	85.5919
XLOC_001912	Y18H1A.14	0	0.0945782	0	0	0.177192	0.202007	0.0945782	0.379199
XLOC_001913	Y18H1A.10	7.66751	8.0064	1.09507	5.06544	5.37394	0.516656	16.769	10.956
XLOC_001914	Y18H1A.2,Y18H1A.4	53.2655	54.7031	67.3093	52.4731	50.0515	76.0582	175.278	178.583
XLOC_001915	Y18H1A.3	14.1716	14.4068	17.353	13.4393	13.9957	19.0035	45.9314	46.4385
XLOC_001916	Y18H1A.7	12.0273	13.1224	11.2316	10.2035	10.3981	9.27392	36.3813	29.8755
XLOC_001917	Y18H1A.15	7.09167	7.49397	1.61685	6.80275	6.62887	1.32368	16.2025	14.7553
XLOC_001918	col-46	1.6485	1.28591	32.7269	2.81127	2.9524	51.0787	35.6613	56.8424
XLOC_001920	Y18H1A.9	39.7457	43.3578	23.4927	37.6613	28.1388	13.8141	106.596	79.6142
XLOC_001921	mps-3	29.8976	33.8718	3.96901	25.6333	25.6921	2.4557	67.7384	53.7811
XLOC_001928	ZC123.4	6.5119	6.45891	10.1138	7.65212	6.83358	9.853	23.0846	24.3387
XLOC_001929	pde-6	26.0911	28.184	25.7124	26.9069	27.5222	31.871	79.9875	86.3001
XLOC_001930	him-19	12.0385	10.4464	5.29968	9.68995	8.99225	6.63788	27.7846	25.3201
XLOC_001931	Y95B8A.12	1.81063	1.80228	2.06022	1.75864	1.89534	2.86664	5.67313	6.52062
XLOC_001934	mig-1	12.7122	12.8471	18.7724	12.9395	16.0327	23.3048	44.3317	52.277
XLOC_001935	cutl-20,shc-1	19.7166	18.7017	19.7072	14.7863	14.9046	24.1659	58.1255	53.8568
XLOC_001938	C54G6.1	10.9911	10.2481	10.4075	9.39894	10.1987	7.94933	31.6467	27.547
XLOC_001939	Y34D9A.8	6.1234	11.5532	6.05726	8.66043	11.2859	11.547	23.7339	31.4933
XLOC_001940	Y34D9A.1	58.7169	52.188	59.1628	55.6951	54.9521	60.8093	170.068	171.457
XLOC_001941	spd-1	25.2094	25.0374	16.0872	19.8046	19.2955	15.7541	66.334	54.8542
XLOC_001942	vps-4	55.1133	52.1741	54.5677	57.4884	55.5123	57.158	161.855	170.159
XLOC_001944	R06A10.4	18.0368	18.253	5.70838	9.87635	8.65104	3.0666	41.9982	21.594
XLOC_001946	Y48G8AL.10,Y48G8AL.9	7.34685	8.09586	7.70078	7.00864	7.42514	8.49935	23.1435	22.9331
XLOC_001947	aps-3	60.9245	56.5296	52.4712	59.0615	63.2349	58.8063	169.925	181.103
XLOC_001949	haf-6	22.5449	22.7872	28.3103	23.9909	25.2783	33.5236	73.6424	82.7928
XLOC_001950	Y48G8AL.16	171.788	206.218	42.0853	182.307	181.273	18.8799	420.091	382.46
XLOC_001951	Y48G8AL.12	4346.52	4899.83	621.011	3905.99	3321.48	176.558	9867.36	7404.03
XLOC_001952	Y48G8AL.13	104.506	112.724	54.9005	89.1108	91.2877	66.3433	272.131	246.742
XLOC_001954	grh-1	5.48781	7.7268	28.5973	8.97731	8.57377	43.5887	41.8119	61.1398
XLOC_001958	K12C11.1	84.5661	84.7162	97.5909	80.8532	90.5387	108.809	266.873	280.201
XLOC_001959	Y92H12BL.4	9.1076	9.15471	10.1881	9.87309	10.853	11.2362	28.4504	31.9623
XLOC_001960	Y92H12BM.1	8.75219	6.36025	5.67695	7.94563	10.3575	9.89426	20.7894	28.1974
XLOC_001961	Y92H12BR.2	38.8604	42.8872	37.5318	37.2742	38.2497	32.1233	119.279	107.647
XLOC_001962	Y92H12BR.4	0.294936	1.51887	1.68418	0.764464	0.557775	2.63222	3.49799	3.95446
XLOC_001963	F37F2.2	51.0989	55.6852	47.0952	58.7843	60.0796	56.1549	153.879	175.019
XLOC_001965	gst-25	0	0	0.269325	0	0	0	0.269325	0
XLOC_001967	Y92H12A.5	10.0914	9.46179	9.33423	9.99575	9.28174	10.4468	28.8874	29.7243
XLOC_001970	cpx-1	12.3808	14.1249	20.0525	13.1267	10.5476	19.9283	46.5582	43.6026
XLOC_001971	Y73E7A.5	0.819285	0.426553	0.858087	0	0	0.913836	2.10393	0.913836
XLOC_001972	Y73E7A.6	39.0942	47.3174	29.7279	46.1209	39.5298	42.2767	116.139	127.927
XLOC_001973	bre-4	16.5536	18.044	14.1206	13.4082	13.3917	17.1489	48.7182	43.9488
XLOC_001974	mab-20	4.11919	3.73431	7.77133	4.49152	4.76858	9.50072	15.6248	18.7608
XLOC_001975	pqn-88	5.21142	2.29664	6.31669	4.79438	3.9475	7.25838	13.8248	16.0003
XLOC_001976	Y71G12B.22,Y71G12B.33	15.396	12.073	2.13323	11.9091	8.65088	1.85124	29.6022	22.4112
XLOC_001977	Y71G12B.23	7.49121	9.54673	17.3505	11.6412	9.54321	16.4	34.3884	37.5844
XLOC_001978	Y71G12B.35	1.85524	2.35577	3.72632	2.60063	3.09875	3.20223	7.93733	8.90161
XLOC_001979	Y71G12B.31	0.706745	0.741697	0.800835	0.677716	0.686403	1.26744	2.24928	2.63156
XLOC_001981	mppa-1	45.8453	45.9518	59.8442	40.5546	41.567	72.2527	151.641	154.374
XLOC_001982	Y71G12B.25	58.5579	58.892	153.009	110.569	130.533	126.976	270.459	368.078
XLOC_001983	Y71G12B.26	4.46714	3.18212	2.10201	1.70169	1.23321	0.522561	9.75127	3.45746
XLOC_001984	Y71G12B.27	58.0742	54.1393	4.1559	42.9402	42.3725	1.88147	116.369	87.1942
XLOC_001985	Y71G12B.32	0.171727	0.816879	3.62565	0.763348	0	2.60499	4.61426	3.36834
XLOC_001986	Y71G12B.30	21.696	22.1807	1.91208	18.7607	12.2343	1.04991	45.7888	32.0449
XLOC_001987	C53H9.3	68.7639	73.357	73.4585	79.5257	70.4893	81.5682	215.579	231.583
XLOC_001990	M01D7.1	0	0	0	0	0.111576	0.130931	0	0.242507
XLOC_001991	scm-1	65.9832	73.7901	84.3093	77.6983	78.2344	91.9857	224.083	247.918
XLOC_001992	Y71G12A.4	10.6437	12.0885	2.62382	9.13566	8.57494	1.24658	25.356	18.9572
XLOC_001993	Y51F10.7	127.165	134.527	235.006	341.477	365.167	415.986	496.698	1122.63
XLOC_001994	Y51F10.10	21.9472	21.9776	25.5429	19.6359	21.9783	24.3803	69.4677	65.9945
XLOC_001996	gap-3	8.95497	8.13098	8.77808	8.97409	9.28242	9.19349	25.864	27.45
XLOC_001997	Y20F4.4	11.7411	12.8607	14.9084	12.087	11.8454	14.5345	39.5102	38.4669
XLOC_001998	Y20F4.8	0.389754	0.612431	1.20433	0.843461	1.13241	1.37734	2.20651	3.35321
XLOC_001999	Y20F4.5	15.5953	11.1435	25.6949	11.7882	11.286	19.525	52.4337	42.5992
XLOC_002000	Y37E3.1	14.6952	13.2274	14.4343	14.6239	13.1453	14.9263	42.3569	42.6955
XLOC_002002	rla-1	3447	3505.46	2825.69	3178.08	3190.79	3087.46	9778.15	9456.33
XLOC_002003	Y37E3.8	5977.9	6185.06	4748.44	5874.98	5849.46	5426.95	16911.4	17151.4
XLOC_002008	Y37E3.13	1.01257	1.05711	1.48764	1.06058	1.12488	1.4976	3.55732	3.68306
XLOC_002009	Y37E3.19	18.7186	13.3113	1.57556	18.366	14.0203	0.626022	33.6055	33.0123
XLOC_002010	fpn-1.1	39.0292	47.7257	26.8105	38.0533	35.8613	25.3524	113.565	99.267
XLOC_002011	Y37E3.25	0.43896	0.68693	1.95287	0.961368	1.16699	2.50597	3.07876	4.63433
XLOC_002012	W03F11.1	6.25147	0.16372	0	0.29617	0.448425	0	6.41519	0.744595
XLOC_002013	gcy-17	0.0795231	0.0556334	0.0365178	0.155249	0.0258507	0.0290094	0.171674	0.210109
XLOC_002014	dct-9	23.7053	23.9509	2.14753	24.4098	16.9753	0.376931	49.8037	41.762
XLOC_002015	W03F11.4	37.3291	36.2439	9.3216	32.444	27.9147	4.57366	82.8946	64.9324
XLOC_002017	abt-2	6.13249	6.70345	7.03042	4.79634	4.43601	7.89004	19.8664	17.1224
XLOC_002019	cdk-7	25.2478	24.6531	27.5596	23.713	22.9488	26.1306	77.4605	72.7924
XLOC_002020	tpxl-1	57.0979	52.7666	30.8557	42.537	42.0429	28.4592	140.72	113.039
XLOC_002021	icp-1	20.9866	21.0255	19.2648	18.5433	17.6852	19.6858	61.2769	55.9143
XLOC_002022	Y39G10AR.30	35.3245	34.9747	47.7565	68.4762	95.2435	113.037	118.056	276.757
XLOC_002023	mcm-4	33.8628	33.6106	30.9853	29.8836	25.9019	31.266	98.4587	87.0515
XLOC_002024	Y39G10AR.15	12.2429	10.9126	5.05073	9.53561	9.5886	3.89532	28.2062	23.0195
XLOC_002025	Y39G10AR.16	24.3404	22.4984	2.02285	20.3766	15.397	1.25549	48.8616	37.0291
XLOC_002028	sydn-1	3.22082	2.21384	2.63067	1.93968	1.73236	3.55689	8.06533	7.22893
XLOC_002029	Y39G10AR.18	21.2739	22.0361	22.6912	21.4737	18.7874	24.1726	66.0012	64.4337
XLOC_002031	F23C8.5,F23C8.6	477.904	497.103	698.182	486.098	535.857	744.196	1673.19	1766.15
XLOC_002032	F23C8.7	12.0756	10.9931	2.20167	8.00648	9.03774	3.017	25.2704	20.0612
XLOC_002033	F23C8.8,F23C8.9	21.8178	18.8634	15.9979	18.2252	18.2579	12.2854	56.6791	48.7685
XLOC_002035	F23C8.11	0.483598	0.250986	0.165691	0.352868	0.580961	0.263658	0.900275	1.19749
XLOC_002037	inx-19	1.28045	0.777405	1.22635	1.77186	0.969621	1.37734	3.28421	4.11882
XLOC_002038	Y74C10AL.2,abtm-1	90.6694	90.7045	108.403	94.0406	96.4508	101.396	289.777	291.887
XLOC_002039	Y23H5B.7	0	0.246388	0.235919	0.164305	0.487741	0.937818	0.482307	1.58986
XLOC_002041	Y23H5B.8	0	0	10.6559	1.6057	0.595141	12.0152	10.6559	14.216
XLOC_002043	aat-5	7.42846	6.85918	14.0414	7.52166	8.10748	14.402	28.329	30.0311
XLOC_002044	fbp-1	126.608	130.982	209.039	145.937	154.146	250.767	466.629	550.85
XLOC_002045	ptr-12	15.6124	17.1569	11.743	11.7217	11.5979	15.2435	44.5123	38.5631
XLOC_002047	Y23H5A.11	0	0	154.719	0	0	0	154.719	0
XLOC_002049	cars-1	80.1329	79.7821	75.0236	79.9285	72.9407	78.9715	234.939	231.841
XLOC_002050	-	5.62879	5.16935	4.14982	5.33073	4.9322	5.95186	14.948	16.2148
XLOC_002051	F40E3.5	16.7618	15.4192	4.68021	12.4212	12.8021	3.58316	36.8612	28.8065
XLOC_002052	F40E3.6	0	0	0	0	0.152286	0	0	0.152286
XLOC_002054	F32B5.7	9.26349	10.8136	12.7666	10.6865	10.0853	15.0732	32.8437	35.845
XLOC_002056	cpz-1	873.193	1012.41	1122.15	1172.33	1398.01	915.535	3007.75	3485.88
XLOC_002060	dnj-30	46.4086	45.6685	38.0248	39.6108	45.0037	38.6669	130.102	123.281
XLOC_002061	Y71F9B.6	10.5697	10.4112	9.78546	10.3792	8.77718	9.73364	30.7664	28.89
XLOC_002062	Y71F9B.8	9.3055	9.43366	9.01799	7.53969	8.03947	15.4376	27.7571	31.0168
XLOC_002063	plk-2	38.6696	35.0261	19.3791	30.029	26.5778	18.9159	93.0748	75.5227
XLOC_002064	Y71F9B.9,sop-3	29.5354	29.7639	33.7277	33.9668	33.5744	30.9153	93.027	98.4565
XLOC_002065	Y71F9B.13	10.6537	11.2212	33.5984	8.26576	5.71703	47.8727	55.4733	61.8555
XLOC_002066	Y71F9B.14,Y71F9B.15	2.45179	2.51167	0.0919304	2.28856	1.64813	0	5.05539	3.93669
XLOC_002067	W03D8.9	122.011	120.985	18.611	94.7827	83.0831	8.50273	261.607	186.369
XLOC_002068	W03D8.1	4.25758	4.30783	0.955021	3.67324	3.23931	0.374068	9.52043	7.28662
XLOC_002069	W03D8.2	13.2094	13.9809	5.11216	12.4529	11.4477	1.89657	32.3025	25.7972
XLOC_002070	W03D8.3,pop-1	19.4357	22.5421	15.3261	24.0153	16.3033	19.0951	57.3039	59.4137
XLOC_002075	W10C8.4	1.76617	0.554	1.70023	1.37003	1.20366	1.53865	4.0204	4.11234
XLOC_002076	W10C8.5	203.303	221.556	335.911	224.052	212.081	372.266	760.77	808.399
XLOC_002077	W10C8.6	5.44491	2.27709	3.06471	0	1.06246	6.10679	10.7867	7.16925
XLOC_002079	Y71F9AL.12	40.3749	41.008	30.9948	38.8261	39.526	30.1015	112.378	108.454
XLOC_002080	rpl-1	3289.61	3472.02	2635.87	3209.02	3085.88	2981.87	9397.5	9276.77
XLOC_002083	arx-1,dnc-5	80.1599	82.755	93.6215	85.9334	83.0742	93.156	256.536	262.164
XLOC_002084	Y71F9AL.17	131.462	138.143	129.315	142.641	141.227	150.759	398.92	434.627
XLOC_002085	pme-1	30.0261	28.6612	19.8502	26.3092	22.7256	18.6212	78.5375	67.656
XLOC_002086	Y71F9AM.8	0	0.94989	0	0	0	0	0.94989	0
XLOC_002087	bam-2	12.5658	12.4215	14.5412	13.3782	12.8005	17.067	39.5285	43.2457
XLOC_002090	Y71F9AR.4	32.1503	28.3965	24.1642	32.7707	28.8386	32.1733	84.711	93.7826
XLOC_002091	Y71F9AR.2,Y71F9AR.3	7.69503	9.84317	9.87555	8.47821	6.70944	11.9038	27.4138	27.0915
XLOC_002092	nduf-5	260.394	265.864	339.308	261.171	253.992	362.555	865.566	877.718
XLOC_002093	mek-2	34.6267	36.1853	35.4738	32.3742	28.297	40.7176	106.286	101.389
XLOC_002094	Y54E10BR.5	209.615	209.402	202.653	235.242	239.056	214.981	621.67	689.279
XLOC_002095	rpb-7	99.305	98.3339	83.3791	105.927	99.3712	76.4147	281.018	281.713
XLOC_002096	mod-5	1.0171	0.691539	2.22063	1.002	0.936591	2.36305	3.92927	4.30164
XLOC_002097	ztf-23	11.1594	10.4656	9.0076	11.0451	10.1877	7.69926	30.6326	28.9321
XLOC_002098	arx-7	39.9476	39.8155	43.608	43.3472	38.8202	37.3617	123.371	119.529
XLOC_002099	M01B12.4,riok-1	43.1373	42.5797	29.2829	36.0268	40.1406	30.6601	115	106.828
XLOC_002100	C45E1.5	0	0	0	0	2.42952	3.69425	0	6.12377
XLOC_002101	C45E1.4	10.5905	10.3532	13.3474	11.0606	7.20933	9.95031	34.2911	28.2202
XLOC_002103	K09H9.8	16.4462	12.5985	22.3777	11.2879	7.44047	34.59	51.4224	53.3184
XLOC_002104	K09H9.5	4.68256	4.90465	32.1303	5.95412	4.52255	42.1062	41.7175	52.5829
XLOC_002105	lpd-6	109.117	117.06	54.294	104.46	100.808	52.9434	280.471	258.211
XLOC_002106	K09H9.7	16.4654	13.0884	13.8192	10.9558	15.3702	14.6526	43.373	40.9786
XLOC_002107	vbh-1	132.865	131.303	96.3052	119.06	110.523	96.5015	360.473	326.084
XLOC_002108	Y54E10A.10	92.9316	101.405	47.1507	86.7966	79.412	46.7698	241.487	212.978
XLOC_002109	Y54E10A.11	25.6581	23.2422	21.419	23.0651	23.0948	24.6769	70.3193	70.8368
XLOC_002110	Y54E10A.12	18.2134	16.6204	10.3433	13.4093	11.3608	6.91661	45.1771	31.6867
XLOC_002112	rom-5	21.8573	18.7493	26.8093	20.701	18.3239	29.9142	67.4159	68.9391
XLOC_002113	cdt-1	6.12794	6.23343	9.04704	6.44937	5.65961	8.33483	21.4084	20.4438
XLOC_002114	mab-31	58.6589	61.6996	68.5583	54.144	56.8635	71.2237	188.917	182.231
XLOC_002119	zip-4	22.4088	20.9134	19.4374	18.631	17.6021	20.5672	62.7596	56.8003
XLOC_002120	pqn-72	25.2882	22.312	1.47288	6.9448	5.18034	1.4832	49.0731	13.6083
XLOC_002121	W01B11.6	83.0052	66.5908	176.373	74.6708	86.9676	239.255	325.969	400.893
XLOC_002122	ace-2	10.0835	9.71838	11.4336	8.35632	9.953	17.3421	31.2355	35.6514
XLOC_002123	Y44E3A.3	138.106	136.704	151.939	117.652	131.984	150.268	426.749	399.904
XLOC_002124	Y44E3A.4	20.9271	20.165	18.505	18.4039	16.9061	20.9619	59.5971	56.2719
XLOC_002125	Y44E3A.6	20.5603	21.59	23.1779	20.9326	21.958	24.6604	65.3282	67.551
XLOC_002126	W05F2.2	2.86001	3.05104	2.85967	2.63192	2.01576	2.44614	8.77072	7.09382
XLOC_002127	W05F2.3	36.814	35.8787	6.30568	23.0812	18.1203	4.52676	78.9984	45.7283
XLOC_002128	W05F2.4	29.6136	32.2953	29.3799	29.9515	30.4264	23.8604	91.2888	84.2383
XLOC_002129	2015-09-01	31.282	29.2332	18.5355	26.964	23.9294	16.9161	79.0507	67.8095
XLOC_002130	Y47G6A.13	16.2797	16.5456	2.66332	13.2815	13.1004	1.43138	35.4886	27.8133
XLOC_002131	Y47G6A.14	11.075	12.3694	13.1268	9.09702	9.66341	10.8264	36.5712	29.5868
XLOC_002132	Y47G6A.15	1171.18	1194.08	1219.82	1524.24	1461.66	874.571	3585.08	3860.47
XLOC_002133	Y47G6A.17	0.27063	0.12471	0.186604	0.203407	0.188169	0.263096	0.581944	0.654672
XLOC_002134	Y47G6A.18	51.3745	57.1473	72.8717	62.471	70.3791	79.2742	181.394	212.124
XLOC_002135	Y47G6A.19	143.728	151.49	31.5483	110.28	103.168	23.0521	326.766	236.5
XLOC_002136	Y47G6A.30	0.597536	1.2457	0.40712	1.42305	0.860174	1.28615	2.25036	3.56937
XLOC_002137	Y47G6A.21,rnp-6	87.0729	92.7062	94.956	90.2032	80.4841	116.635	274.735	287.322
XLOC_002138	Y47G6A.22	90.1368	92.5453	167.782	87.2123	92.5413	190.95	350.464	370.704
XLOC_002139	Y47G6A.29,lpd-3	16.2754	16.9279	14.8544	17.7265	16.5348	14.8481	48.0577	49.1094
XLOC_002141	mis-12	21.3514	19.9227	25.3625	23.3474	21.1952	26.3908	66.6366	70.9334
XLOC_002142	Y47G6A.25	17.8595	13.703	10.0703	10.6637	11.2693	8.34728	41.6328	30.2803
XLOC_002143	Y47G6A.26	43.0754	35.1337	5.0086	32.3038	34.0844	2.3495	83.2177	68.7377
XLOC_002144	jmjc-1	16.7717	19.0666	19.6916	21.0289	21.9401	22.6019	55.5299	65.5709
XLOC_002146	ccb-1	10.9015	13.0811	15.5963	12.3699	11.9899	13.0294	39.5789	37.3892
XLOC_002147	col-50	0	0.0848488	0	0.072229	0	0.0767711	0.0848488	0.149
XLOC_002148	T28F2.7	8.97005	9.12571	4.95828	9.38173	9.69881	5.37383	23.054	24.4544
XLOC_002149	smp-2	32.2511	34.656	37.6194	31.0035	36.9034	43.412	104.526	111.319
XLOC_002150	ftn-2	671.506	854.581	536.244	906.577	1132.11	844.335	2062.33	2883.02
XLOC_002151	rab-8	59.3447	56.9596	59.1076	58.1911	52.9755	64.5451	175.412	175.712
XLOC_002152	D1037.5	15.057	15.1671	2.31853	11.7181	11.4984	1.11403	32.5426	24.3305
XLOC_002153	msh-2	29.5302	27.2366	24.5851	27.5862	23.1206	22.7715	81.3519	73.4783
XLOC_002155	F21A9.2	3.82524	2.34857	1.66299	2.79432	2.17744	2.34144	7.8368	7.3132
XLOC_002156	lin-59	14.4256	16.5561	16.9763	15.457	14.3582	21.8554	47.958	51.6706
XLOC_002157	larp-5	71.805	74.2228	59.1934	75.6323	76.5676	60.7992	205.221	212.999
XLOC_002159	inx-13	71.1848	75.5879	115.637	78.5479	66.7475	135.048	262.41	280.343
XLOC_002160	inx-12	83.6607	89.0528	116.277	85.7358	79.9121	159.418	288.99	325.066
XLOC_002162	ric-19	6.33959	5.26611	9.79857	5.69981	5.99271	8.27662	21.4043	19.9691
XLOC_002163	ptr-2	38.5301	40.0779	29.428	45.3441	42.4621	23.9003	108.036	111.706
XLOC_002164	C32E8.9,unc-11	48.562	45.704	68.3217	43.6498	45.8726	78.1982	162.588	167.721
XLOC_002165	C32E8.11	28.6511	28.1062	28.093	27.8658	28.5631	29.327	84.8503	85.7559
XLOC_002166	F53F10.7	0	0	0	0.663677	0	0	0	0.663677
XLOC_002167	F53F10.1	14.8589	14.7726	18.9652	18.2936	19.5709	13.7098	48.5967	51.5743
XLOC_002168	T03F1.6,gsp-4	96.9878	96.0325	13.0981	76.3976	63.5079	6.93184	206.118	146.837
XLOC_002169	T03F1.7	12.7216	11.1873	12.097	9.3923	8.39741	11.4466	36.0059	29.2363
XLOC_002170	T03F1.8,hcp-4	84.0163	81.0168	75.716	78.2593	72.3752	82.1225	240.749	232.757
XLOC_002171	clec-53	13.7674	13.6707	13.3639	12.9512	12.03	12.1119	40.802	37.0931
XLOC_002172	T03F1.12	18.9567	16.9466	21.3588	19.83	16.9515	20.3466	57.2621	57.1281
XLOC_002173	abf-2	1.99074	2.45195	13.1943	9.97987	6.08795	6.51574	17.637	22.5836
XLOC_002174	abf-1	2.13405	0	0	0	0	2.27412	2.13405	2.27412
XLOC_002175	C50F2.4	26.4996	28.8424	40.4504	29.839	30.7333	40.3572	95.7924	100.929
XLOC_002177	C50F2.5	37.5939	31.2743	11.7114	32.1604	33.2979	8.83101	80.5796	74.2893
XLOC_002178	fkb-5	156.935	160.491	912.849	309.894	323.758	1091.51	1230.28	1725.16
XLOC_002179	C50F2.7,C50F2.8	6.28389	7.88215	7.23283	5.52306	4.42707	6.69961	21.3989	16.6497
XLOC_002180	T20F5.3	36.5554	35.924	26.2912	31.8722	28.6085	26.2337	98.7706	86.7144
XLOC_002181	T20F5.8	0.298543	0.312539	0.407321	0.873716	0.289471	0.323782	1.0184	1.48697
XLOC_002182	T20F5.4	1.87447	2.10503	14.6041	2.7278	2.91053	21.2573	18.5836	26.8956
XLOC_002183	T20F5.5,T20F5.6	35.5728	35.8809	20.8741	34.2302	28.3917	24.8079	92.3278	87.4298
XLOC_002184	T20F5.7	42.5316	44.997	30.443	39.706	34.9989	27.3583	117.972	102.063
XLOC_002185	lrp-2	5.79271	5.08434	6.61098	4.85596	4.33637	8.84197	17.488	18.0343
XLOC_002186	F47B3.5	16.2299	16.5241	3.04135	15.1863	9.95304	0.831716	35.7954	25.9711
XLOC_002187	F47B3.6	16.3781	14.2627	5.72852	10.4287	11.6067	3.09639	36.3693	25.1318
XLOC_002188	F47B3.7	22.5715	20.315	1.77366	15.6936	14.1622	0.810657	44.6602	30.6665
XLOC_002189	F28H1.4	49.7003	54.0584	25.8844	32.182	33.0926	18.7786	129.643	84.0532
XLOC_002190	F28H1.5	13.9577	14.4825	3.03387	11.0998	13.7222	0.521557	31.4741	25.3436
XLOC_002191	unc-73	26.6829	27.2123	27.5258	27.2094	26.6274	30.1978	81.421	84.0346
XLOC_002195	clec-89	2.23899	2.77113	2.82502	3.05017	2.69599	1.4791	7.83514	7.22526
XLOC_002196	E01A2.4	50.514	52.6015	36.9041	47.081	42.3558	36.0779	140.02	125.515
XLOC_002197	E01A2.5	20.8517	20.7306	20.6373	21.3504	22.6869	19.4096	62.2196	63.4469
XLOC_002198	E01A2.6	88.4065	75.8233	60.788	68.4989	70.0805	59.7845	225.018	198.364
XLOC_002200	E01A2.7	3.53441	4.23915	6.5744	6.03731	7.82127	6.25241	14.348	20.111
XLOC_002201	E01A2.10	10.1691	8.51158	15.8242	10.9192	9.92937	20.0615	34.5049	40.9101
XLOC_002202	E01A2.8	0.349185	0	0	0	0.337929	0	0.349185	0.337929
XLOC_002203	R12E2.15	3683.65	4063.84	610.011	4078.67	3675.09	227.257	8357.5	7981.02
XLOC_002204	R12E2.6	73.231	64.8139	12.8748	84.3102	62.2365	0	150.92	146.547
XLOC_002205	R12E2.7	2038.23	2302.24	188.098	1532.41	1326.57	60.2186	4528.57	2919.2
XLOC_002206	R12E2.8	0.974668	1.01677	1.5704	2.86932	1.74229	2.1373	3.56184	6.74891
XLOC_002207	inx-15	99.8381	102.412	79.3257	102.448	111.573	80.7258	281.576	294.747
XLOC_002208	egg-5	20.2274	20.2493	3.37327	13.4046	11.8721	2.26758	43.85	27.5443
XLOC_002210	R12E2.11	90.1224	97.1889	96.7623	90.7203	94.0237	122.391	284.074	307.135
XLOC_002211	R12E2.12	77.6396	78.9396	83.1846	77.7775	75.3986	92.4792	239.764	245.655
XLOC_002212	R12E2.13	136.86	147.036	144.512	142.529	136.267	148.839	428.408	427.635
XLOC_002213	hop-1	11.2545	9.86869	6.34852	8.99382	10.9612	6.14878	27.4717	26.1038
XLOC_002215	C18E3.9	22.2552	16.6586	12.2279	18.2185	15.3894	10.1211	51.1417	43.729
XLOC_002216	ndx-7	28.4524	26.4056	46.7001	24.5077	28.5907	48.8311	101.558	101.929
XLOC_002217	exoc-7	18.1746	18.3115	21.639	19.9809	22.4824	24.0695	58.1251	66.5328
XLOC_002218	C43E11.9	132.944	133.179	54.7451	120.285	112.254	60.6338	320.868	293.173
XLOC_002219	cdc-6	25.773	24.7237	17.3013	25.0092	23.1244	19.2138	67.798	67.3474
XLOC_002220	Y47D9A.4	9.06565	6.72689	1.79101	4.39863	6.83784	0	17.5835	11.2365
XLOC_002221	Y47D9A.5	4.97084	4.99241	0.307308	4.09001	5.4774	0.171625	10.2706	9.73904
XLOC_002226	ZK973.16	14.9584	0	41.1674	27.035	53.3605	123.587	56.1258	203.983
XLOC_002228	ZK973.18	74.7835	0	41.1674	0	0	185.567	115.951	185.567
XLOC_002230	ZK973.22	180.037	0	0	0	0	92.8359	180.037	92.8359
XLOC_002231	ZK973.20	22.3815	0	0	0	0	0	22.3815	0
XLOC_002232	ZK973.21	27.3466	0	0	0	0	145.609	27.3466	145.609
XLOC_002236	ZK973.8	16.083	16.7045	4.13086	14.4003	11.9429	1.50901	36.9184	27.8522
XLOC_002237	ZK973.9	18.6554	16.0002	15.1239	14.7914	15.5703	13.3303	49.7795	43.692
XLOC_002238	lpd-5	274.217	259.06	319.986	289.228	277.331	339.584	853.263	906.143
XLOC_002239	ZK973.11	21.6854	21.1146	23.811	19.5649	20.1329	26.3049	66.611	66.0027
XLOC_002241	T21E12.5	9.54994	8.65635	2.2145	8.6637	6.79361	1.76059	20.4208	17.2179
XLOC_002242	C41D11.3,C41D11.4	18.3428	20.3909	18.3231	16.975	17.6611	21.3489	57.0568	55.985
XLOC_002243	cps-6	53.8916	52.759	101.673	56.5362	56.8904	101.101	208.324	214.528
XLOC_002244	C41D11.9	5.8665	5.92995	8.31388	7.74312	6.19344	7.38183	20.1103	21.3184
XLOC_002245	C41D11.5	19.7441	18.4698	11.3515	16.4861	16.7472	12.9044	49.5654	46.1377
XLOC_002246	C41D11.6,eri-7	9.21357	6.51396	6.76219	6.45795	6.44744	7.6413	22.4897	20.5467
XLOC_002250	Y119C1B.4	50.9304	50.049	64.9432	43.8816	49.081	69.0114	165.923	161.974
XLOC_002251	Y119C1B.5	20.9352	21.0619	35.1071	26.7798	30.9356	48.6588	77.1042	106.374
XLOC_002252	Y119C1B.6	21.1716	6.23624	24.5441	5.72443	8.54929	12.9937	51.9519	27.2674
XLOC_002253	bet-1	24.6187	25.0764	22.4554	22.9235	24.5314	23.7404	72.1505	71.1953
XLOC_002254	Y119C1B.9	51.503	51.9403	29.3176	50.8382	50.4242	21.9501	132.761	123.213
XLOC_002255	Y119C1B.11	0	2.66882	0	0	2.35214	0	2.66882	2.35214
XLOC_002256	Y119C1B.10	6.07587	5.31482	6.23523	6.27754	9.94155	7.83811	17.6259	24.0572
XLOC_002257	ceh-17	0.200682	0.421572	1.37766	0.196357	0.585852	0.218776	1.99991	1.00099
XLOC_002259	D1007.3	1.08452	0.452655	0.594345	0.638409	0.838198	0.118259	2.13152	1.59487
XLOC_002260	D1007.18	11.2088	13.1511	7.59855	10.2231	9.23107	8.19137	31.9584	27.6455
XLOC_002261	D1007.4	13.4604	9.97914	12.4985	10.2561	12.1207	12.5193	35.938	34.8961
XLOC_002262	D1007.5	20.009	21.2805	22.9967	20.4954	17.2127	23.9314	64.2862	61.6395
XLOC_002263	rps-10	2943.41	3195.33	2488.95	2897.37	2855.32	2775.08	8627.69	8527.77
XLOC_002265	D1007.19	0.585662	1.53518	2.83034	0.864125	0.573409	2.58679	4.95118	4.02432
XLOC_002266	nrd-1	20.4376	20.4378	19.705	20.1321	19.5395	18.6948	60.5804	58.3664
XLOC_002267	C44E4.1,C44E4.2,C44E4.7	33.8521	36.0605	32.4383	36.2899	33.0951	33.3286	102.351	102.714
XLOC_002268	acbp-1	795.882	835.89	809.145	924.276	918.329	938.219	2440.92	2780.82
XLOC_002269	C44E4.3	93.9575	93.4598	70.714	83.3712	73.3836	52.6456	258.131	209.4
XLOC_002270	Y119C1A.1	23.6478	21.605	24.2632	21.9633	21.7721	21.8768	69.516	65.6122
XLOC_002271	rpl-4	3266.07	3499.39	2669.02	3223.92	3087.11	2992.16	9434.48	9303.19
XLOC_002273	B0041.5	55.6782	54.2473	40.8473	60.7708	59.4052	35.6333	150.773	155.809
XLOC_002274	ptps-1	54.004	38.474	39.1538	46.0874	45.3817	43.2188	131.632	134.688
XLOC_002275	-	2.3196	1.61572	4.55934	3.72846	3.22124	3.25606	8.49466	10.2058
XLOC_002276	xnp-1	29.5169	28.1355	33.6078	29.9941	30.2146	32.881	91.2602	93.0897
XLOC_002278	tag-192	7.34488	7.4945	11.3184	7.62	8.64307	15.0131	26.1578	31.2762
XLOC_002279	gsp-3	141.726	129.445	20.777	115.543	98.2284	10.1966	291.948	223.968
XLOC_002280	W09C3.7	54.8653	50.1296	8.20036	44.6941	41.6895	4.84344	113.195	91.227
XLOC_002281	W09C3.8	4.00218	3.83221	0.281466	2.88201	3.67937	0	8.11586	6.56138
XLOC_002282	C10H11.8,let-502	36.3002	35.6195	30.8222	33.7116	32.3564	30.8507	102.742	96.9187
XLOC_002284	kca-1	31.9524	30.5887	7.02782	20.1239	19.1086	3.88281	69.5689	43.1153
XLOC_002285	M04F3.6	16.6321	14.3407	2.52748	9.16181	9.24016	0.858114	33.5003	19.2601
XLOC_002286	M04F3.3	20.7011	20.3114	15.0862	21.5224	19.8353	12.1909	56.0987	53.5486
XLOC_002287	-	38.5994	23.2579	41.9714	47.3796	27.4282	43.9424	103.829	118.75
XLOC_002288	M04F3.4	78.057	76.0141	63.6271	71.7488	70.4906	69.042	217.698	211.281
XLOC_002289	M04F3.5	13.1969	13.5981	17.5142	15.1732	13.2984	17.9872	44.3092	46.4588
XLOC_002291	zig-7	114.29	115.865	114.556	123.967	122.534	118.437	344.711	364.938
XLOC_002292	F57C9.7	12.0903	12.8267	8.33334	11.372	11.2769	8.96347	33.2503	31.6124
XLOC_002293	rga-6	0.965956	0.979388	1.44346	0.616498	0.751709	1.20777	3.3888	2.57598
XLOC_002298	glc-2	6.31102	2.46454	6.63107	3.48148	3.15119	5.5294	15.4066	12.1621
XLOC_002300	unc-38	2.79579	2.60647	4.53555	3.03936	3.20548	3.85707	9.93781	10.1019
XLOC_002301	F21F3.6	162.758	169.06	139.27	160.681	135.723	141.325	471.088	437.729
XLOC_002302	imb-1	25.1026	25.1883	21.7978	23.5201	24.1572	23.6053	72.0887	71.2826
XLOC_002303	F28B3.10	107.25	111.447	136.72	103.296	121.991	150.843	355.417	376.13
XLOC_002304	F28B3.6,him-1	107.285	104.54	99.6743	89.9044	106.636	107.147	311.499	303.687
XLOC_002305	W03G9.8	26.6648	24.2611	22.8843	28.1392	25.5119	20.9885	73.8102	74.6396
XLOC_002306	app-1	86.9563	95.9478	80.5596	90.4141	91.4554	88.5962	263.464	270.466
XLOC_002307	W03G9.5	6.02158	4.90577	1.20702	4.91201	4.39152	0.371846	12.1344	9.67538
XLOC_002309	paf-1	7.3792	6.87083	0.591236	5.03908	4.48366	0.282415	14.8413	9.80516
XLOC_002310	W03G9.7	0.285482	0.527424	0.86387	0.386996	0.436302	0.561034	1.67678	1.38433
XLOC_002311	dyf-1	1.39412	1.04862	1.64644	1.14534	1.3965	1.33597	4.08918	3.87781
XLOC_002312	F54C1.8	15.682	21.6034	1.14289	13.5124	17.7315	1.14112	38.4283	32.385
XLOC_002313	F54C1.6	0.552041	0.724489	0.761432	0.134488	0.134588	0.603485	2.03796	0.872561
XLOC_002314	pat-10	3369.63	3569.21	3766.26	3399.87	3496.32	3882.16	10705.1	10778.4
XLOC_002315	C46H11.7	21.7258	29.6033	13.6273	27.1576	23.5201	3.70291	64.9564	54.3806
XLOC_002316	phat-1	22.654	23.3197	21.0578	26.2012	23.7333	8.45689	67.0315	58.3914
XLOC_002317	phat-2	62.0179	72.1147	37.339	58.6032	51.2741	14.5727	171.472	124.45
XLOC_002318	C46H11.10	2.65725	2.47866	2.7106	3.76806	3.17854	3.0523	7.84651	9.9989
XLOC_002319	fhod-1	19.637	20.2847	12.9023	17.3142	17.5304	11.9154	52.824	46.76
XLOC_002320	vha-16	373.53	373.812	374.807	367.421	398.096	413.967	1122.15	1179.48
XLOC_002322	tag-300	16.7226	17.7034	9.93551	17.0194	14.2009	8.77407	44.3615	39.9944
XLOC_002323	chp-1	69.6447	65.7421	53.4918	62.1133	60.4372	51.5021	188.879	174.053
XLOC_002324	pas-3	323.474	339.084	276.235	323.895	314.548	299.736	938.793	938.179
XLOC_002325	Y110A7A.15,Y110A7A.21	49.7483	42.9335	52.9988	39.9555	42.647	37.1151	145.681	119.718
XLOC_002327	elpc-1	30.2461	28.0105	16.931	28.1208	25.6546	15.8769	75.1876	69.6523
XLOC_002328	mat-1	52.3828	49.8628	39.3202	41.539	47.4161	43.6269	141.566	132.582
XLOC_002329	ppw-2	77.762	71.8904	69.2443	73.3679	64.6209	64.6381	218.897	202.627
XLOC_002330	Y110A7A.19	60.7368	56.7897	60.1756	56.9977	53.5707	65.0446	177.702	175.613
XLOC_002331	spd-5	67.3992	64.5565	51.332	61.0757	56.2671	44.3941	183.288	161.737
XLOC_002333	osr-1	2.1552	3.152	50.9737	6.61	4.84385	58.1065	56.2809	69.5603
XLOC_002334	sem-2	41.324	45.3006	11.5804	34.1891	29.6247	8.99509	98.205	72.8089
XLOC_002335	C32E12.4	10.5371	11.4034	12.929	12.547	11.4049	11.0268	34.8695	34.9787
XLOC_002336	B0261.5	8.62636	10.2027	0.827148	6.82195	10.0367	1.08876	19.6562	17.9474
XLOC_002337	B0261.6	115.508	101.692	7.43888	82.3228	66.4284	2.52886	224.639	151.28
XLOC_002338	B0261.7	68.8129	61.8839	36.4878	58.9961	53.9417	31.541	167.185	144.479
XLOC_002339	B0261.8	29.0638	31.8913	64.0015	39.4114	45.6294	69.9067	124.957	154.947
XLOC_002340	C01G8.1	32.4734	28.4191	3.26642	17.4358	15.2163	2.26924	64.1589	34.9213
XLOC_002341	cln-3.2	9.36844	8.89967	14.8704	9.20487	12.7402	16.6373	33.1385	38.5824
XLOC_002342	dhs-1	32.0223	31.6811	33.3136	32.3624	31.407	30.6677	97.017	94.4371
XLOC_002343	dnj-4	15.4646	12.3119	20.5402	14.0191	14.3002	19.6426	48.3167	47.9619
XLOC_002344	erm-1	236.219	244.937	216.929	229.514	231.852	240.733	698.085	702.099
XLOC_002345	C01G8.6	68.4052	71.3343	66.1701	67.4026	57.1672	61.2853	205.91	185.855
XLOC_002346	F48C1.4,let-526	28.6161	30.2298	30.7651	31.0449	29.1749	37.6485	89.611	97.8683
XLOC_002348	F48C1.5	22.1601	16.3305	14.7371	12.6628	18.8129	13.0436	53.2277	44.5193
XLOC_002349	F48C1.6	50.0967	52.6788	56.8731	46.9612	49.7276	62.2277	159.649	158.916
XLOC_002350	spe-11	77.6646	72.7375	6.77425	59.4743	60.0452	3.09683	157.176	122.616
XLOC_002351	F48C1.9	0	0	0	0.836258	0.830281	0	0	1.66654
XLOC_002352	F48C1.11	0.241056	0	0	0.235159	0.711384	0	0.241056	0.946543
XLOC_002353	F48C1.8	0	0	0.249695	0	0.869437	0	0.249695	0.869437
XLOC_002354	apm-1	60.872	65.43	58.6314	65.0852	72.9488	62.199	184.933	200.233
XLOC_002356	F55A12.8	53.2986	50.5408	32.9011	49.3066	46.1377	32.8278	136.74	128.272
XLOC_002360	F55A12.10	18.8936	13.8658	13.5535	16.7444	16.3399	12.9126	46.3129	45.9969
XLOC_002361	pqn-44	91.9005	95.3084	52.4374	79.0434	80.1114	59.36	239.646	218.515
XLOC_002365	frm-4	35.7056	34.9303	37.7895	32.6279	30.3782	35.4202	108.425	98.4263
XLOC_002366	coq-1	29.2568	30.1728	54.2795	27.5815	30.2838	52.2454	113.709	110.111
XLOC_002367	C30H7.2	69.0012	65.1712	66.0646	61.0163	67.73	68.1736	200.237	196.92
XLOC_002368	F27C1.6	53.1949	51.3712	35.0561	50.395	49.2441	33.4203	139.622	133.059
XLOC_002369	atp-3	701.9	753.371	914.402	704.765	708.439	973.461	2369.67	2386.66
XLOC_002371	dpy-5	2068.13	2425.08	2197.13	2663.09	2646.19	1665.31	6690.34	6974.59
XLOC_002372	F27C1.10,F27C1.11	0.966293	0.718255	0.734128	0.456117	0.374838	0.816018	2.41868	1.64697
XLOC_002374	ferl-1	1.58833	1.29835	2.09176	1.96228	1.32793	1.34082	4.97844	4.63103
XLOC_002376	hil-8	0.914824	0.630785	1.0545	0.959539	2.12174	1.63071	2.60011	4.71199
XLOC_002377	T05E8.3	30.1603	30.8582	21.4876	26.1193	24.8614	21.6233	82.5061	72.604
XLOC_002378	C09D4.4	30.399	28.1342	28.5064	28.9653	27.8265	28.7802	87.0396	85.572
XLOC_002379	rpl-19	3723.04	3978.19	3156.85	3527.45	3427.99	3354.62	10858.1	10310.1
XLOC_002380	C09D4.6	0	0	0	0.244309	0	0	0	0.244309
XLOC_002381	-	41.7226	47.3131	8.38999	40.6097	27.8433	2.81663	97.4257	71.2696
XLOC_002383	F59A3.3	37.7598	37.1658	36.0769	32.1394	30.7072	37.9067	111.002	100.753
XLOC_002384	F59A3.4	32.6703	31.134	40.7097	37.0381	32.5571	43.345	104.514	112.94
XLOC_002385	rpa-3,rpa-4	23.4541	22.1296	24.0116	21.4138	21.3964	24.6975	69.5953	67.5077
XLOC_002386	F59A3.7	3.17525	4.71211	4.88239	3.12474	1.01956	2.73196	12.7698	6.87626
XLOC_002388	F59A3.8	13.7797	12.6371	3.07759	10.5581	10.5365	1.40782	29.4944	22.5024
XLOC_002389	pup-3	0.348383	0.288062	0.665944	0.610433	0.734852	0.4543	1.30239	1.79958
XLOC_002392	ostd-1	189.865	196.669	191.513	199.839	209.115	221.957	578.047	630.911
XLOC_002394	pqn-52	283.98	300.831	152.384	219.052	208.521	151.582	737.195	579.155
XLOC_002395	cey-3	306.131	304.266	125.009	262.56	231.61	96.7851	735.406	590.955
XLOC_002396	klp-15	28.1571	25.9089	8.80689	19.0724	18.0236	8.15113	62.8729	45.2471
XLOC_002397	F46F11.11,tag-163,tag-83	56.7977	59.0132	61.7838	61.2803	66.8485	50.7881	177.595	178.917
XLOC_002400	ubl-5	89.025	82.7468	94.9904	101.949	107.065	103.727	266.762	312.741
XLOC_002401	vha-10	804.021	817.822	871.225	826.587	892.747	998.323	2493.07	2717.66
XLOC_002402	F46F11.9	21.5163	20.0693	17.0462	20.2434	21.68	20.0934	58.6318	62.0168
XLOC_002404	F46F11.6	43.57	40.8945	36.3503	38.1137	36.5946	32.0762	120.815	106.785
XLOC_002405	F46F11.10	7.5733	6.01687	9.11126	6.42256	5.83638	7.94517	22.7014	20.2041
XLOC_002406	F46F11.8	15.7732	14.0186	7.79045	13.6365	13.7403	9.49985	37.5823	36.8766
XLOC_002407	F55F8.2	51.8488	50.3256	31.183	50.585	46.8448	30.4971	133.357	127.927
XLOC_002408	F55F8.3	47.692	47.1167	27.5645	44.2936	42.8825	29.3621	122.373	116.538
XLOC_002409	cir-1,mff-2,tag-345	112.433	120.845	83.2302	118.306	107.123	85.9386	316.508	311.368
XLOC_002410	F55F8.7	24.2759	21.7278	6.83705	19.007	17.572	3.4558	52.8407	40.0348
XLOC_002411	F55F8.8	3.21305	3.71096	0.657717	4.2114	2.32903	0.517813	7.58173	7.05824
XLOC_002412	F55F8.9	33.5651	34.3408	20.0112	27.284	28.9589	22.4045	87.9171	78.6474
XLOC_002413	unc-40	19.3414	18.6797	18.4702	19.1371	18.2425	19.5929	56.4913	56.9725
XLOC_002417	C04F1.1,F56H1.3	10.0899	8.6732	28.3464	13.6684	21.416	20.2134	47.1095	55.2978
XLOC_002418	rpt-5	184.193	198.432	154.851	178.884	176.862	154.04	537.476	509.786
XLOC_002419	ccpp-1	22.6628	23.6852	23.0837	22.4835	23.0787	22.8373	69.4317	68.3995
XLOC_002420	F56H1.7	123.407	110.366	132.297	107.299	111.374	146.947	366.07	365.62
XLOC_002425	cpb-3	50.5367	46.3393	27.3851	42.5755	36.9674	21.9268	124.261	101.47
XLOC_002426	glh-3	16.0353	15.0189	10.5606	13.7007	12.6574	9.64965	41.6148	36.0078
XLOC_002427	mtk-1	13.0097	12.6794	15.5054	14.2359	12.903	18.5484	41.1945	45.6873
XLOC_002428	vps-51	18.5059	16.7311	21.2566	18.753	18.0893	22.2916	56.4936	59.1339
XLOC_002429	C32F10.4	26.2972	24.3604	25.9465	24.9471	32.6821	25.8158	76.6041	83.445
XLOC_002430	hmg-3	51.0243	47.6171	36.4696	46.7366	40.7024	31.2554	135.111	118.694
XLOC_002431	nhr-2	0.0625872	0.26203	0.428707	0.123006	0.242755	0.204166	0.753324	0.569927
XLOC_002432	C32F10.8	181.147	185.919	193.601	169.062	165.021	214.354	560.667	548.437
XLOC_002433	F33D11.5	0.177547	0.363024	0.247715	0	0.170526	0.295704	0.788286	0.46623
XLOC_002436	F33D11.7	18.5819	16.9945	2.14717	13.8002	11.8927	1.02194	37.7236	26.7148
XLOC_002437	F33D11.8	15.7237	29.0924	15.3192	18.167	17.9692	10.3398	60.1353	46.476
XLOC_002439	F33D11.12,F33D11.9	62.0796	60.9412	71.229	64.8432	73.3206	81.1371	194.25	219.301
XLOC_002440	F33D11.10	94.7121	92.4329	82.8098	96.5653	96.2208	82.7488	269.955	275.535
XLOC_002441	vpr-1	182.127	191.279	153.462	173.544	173.596	141.15	526.868	488.29
XLOC_002443	noah-1	9.03724	11.4797	279.073	35.1192	21.6942	449.629	299.59	506.442
XLOC_002445	stam-1	64.3424	65.2483	54.5992	69.5353	62.7752	44.9088	184.19	177.219
XLOC_002448	B0207.6	21.0449	17.5335	18.5132	16.3575	18.9023	16.2697	57.0916	51.5295
XLOC_002449	B0207.7	24.1343	23.1597	5.21405	23.1369	19.5021	3.77952	52.508	46.4185
XLOC_002452	B0207.9	26.2604	30.7562	3.88229	20.5453	22.4178	1.31738	60.8989	44.2805
XLOC_002453	B0207.10	4.60112	3.5846	6.23535	6.56494	4.3617	6.17332	14.4211	17.1
XLOC_002454	B0207.11	12.6952	8.02474	0.93903	9.23553	9.17088	0.446178	21.659	18.8526
XLOC_002455	avr-14	6.48413	7.53461	12.5917	7.8539	10.1984	9.96411	26.6104	28.0164
XLOC_002456	C06A5.10,C06A5.4,C06A5.5,C06A5.6	26.7422	28.399	13.9178	25.3259	20.2992	11.5186	69.059	57.1437
XLOC_002457	unc-94	37.5522	36.0901	43.8995	31.1281	32.4043	43.6255	117.542	107.158
XLOC_002458	C06A5.12	5.20105	1.55886	9.75876	4.33813	3.96129	9.00149	16.5187	17.3009
XLOC_002459	C06A5.8	8.9965	8.95146	6.27868	7.52844	7.77015	6.62873	24.2266	21.9273
XLOC_002460	rnf-1	17.3086	15.5842	14.3267	15.2139	14.0889	13.2089	47.2195	42.5117
XLOC_002461	B0025.5	109.593	90.3235	6.8685	67.4452	51.7082	1.36121	206.785	120.515
XLOC_002463	ceh-2	1.58867	1.19285	1.58513	0.697232	1.1065	0.471147	4.36665	2.27488
XLOC_002465	C27A12.6	15.7693	15.2283	17.1879	14.353	13.9337	13.3488	48.1855	41.6355
XLOC_002466	C27A12.7,ari-1	55.6699	54.8736	47.9693	52.2143	49.5328	45.81	158.513	147.557
XLOC_002467	C27A12.9	11.2181	9.29531	11.761	9.34447	10.9961	9.60376	32.2744	29.9443
XLOC_002468	ZK484.3,ZK484.4	54.9862	58.8776	50.9199	54.6491	57.958	52.8165	164.784	165.424
XLOC_002471	ZK484.5	961.451	918.7	77.4389	720.161	610.749	29.8988	1957.59	1360.81
XLOC_002472	ZK484.6	15.0138	19.528	2.5493	14.6728	10.033	1.46319	37.0911	26.169
XLOC_002473	ZK484.7	24.4326	22.9463	11.0791	23.5148	20.4338	4.91924	58.458	48.8678
XLOC_002474	nspd-1	602.899	556.931	49.928	474.255	423.022	23.9446	1209.76	921.222
XLOC_002476	T27A3.5	47.2912	47.9248	10.67	45.8855	36.8397	4.72446	105.886	87.4497
XLOC_002478	T27A3.6	21.6313	20.7844	32.5013	21.9558	22	41.8209	74.917	85.7767
XLOC_002479	T27A3.7	15.2751	12.0705	11.8018	10.7828	11.5072	9.75577	39.1474	32.0458
XLOC_002481	F56F4.10	0	0	0	0	0	5.43743	0	5.43743
XLOC_002483	abt-6	0.16817	0.350631	0	0	0.325969	0.184226	0.518801	0.510195
XLOC_002484	ttr-55	21.6072	20.2038	3.31823	16.825	13.7579	0.493287	45.1292	31.0762
XLOC_002485	T09B4.6	5.95292	5.85091	5.3907	5.33866	5.60173	3.74805	17.1945	14.6884
XLOC_002486	T09B4.7	6.62503	5.40978	2.75144	8.13295	7.98264	1.38539	14.7863	17.501
XLOC_002488	T09B4.8	78.5889	78.5156	84.98	80.1927	86.0211	111.271	242.084	277.485
XLOC_002490	T09B4.9	59.0365	58.1654	92.4938	63.1897	59.9694	109.418	209.696	232.577
XLOC_002491	chn-1	31.664	26.6033	30.928	31.5502	30.9149	31.8765	89.1953	94.3416
XLOC_002492	T05E7.4	5.03431	6.606	2.90486	4.54866	3.4521	3.62619	14.5452	11.6269
XLOC_002494	vet-1	0.0729827	0.0745799	0.102461	0	0.140057	0.162199	0.250024	0.302256
XLOC_002495	T08B2.7	188.301	191.752	207.256	205.127	213.583	241.197	587.309	659.907
XLOC_002496	T08B2.8	104.863	96.4951	111.382	113.671	110.394	111.565	312.74	335.63
XLOC_002497	fars-1	123.749	125.656	106.416	119.452	122.937	110.86	355.821	353.249
XLOC_002499	rps-17	4098.29	4131.94	3669.82	4245.04	4162.1	3931.33	11900	12338.5
XLOC_002500	T08B2.11	8.61007	8.16742	4.4868	8.75498	6.35791	2.42755	21.2643	17.5404
XLOC_002501	T08B2.12	211.979	209.182	19.3732	169.396	147.586	5.14228	440.534	322.124
XLOC_002503	spp-15	79.454	59.1001	138.751	99.6409	104.883	140.723	277.305	345.247
XLOC_002506	oac-9	8.87346	7.43862	1.22326	6.56265	6.00115	0.411986	17.5353	12.9758
XLOC_002507	twk-37	2.7443	2.2806	0.142717	2.50044	2.24402	0.227315	5.16762	4.97178
XLOC_002508	C10G11.8	102.713	95.3283	8.7741	71.0375	58.1987	4.45685	206.815	133.693
XLOC_002509	C10G11.9	136.782	134.222	15.1283	96.9671	89.1387	6.12393	286.132	192.23
XLOC_002515	C10G11.10	8.46928	3.48311	0.511373	6.12446	4.48252	0.811099	12.4638	11.4181
XLOC_002516	let-381	1.25375	1.5113	0.795005	1.04129	0.747667	1.47621	3.56006	3.26517
XLOC_002517	K04F10.8	6.63017	6.61061	9.34195	6.04581	5.53612	9.0754	22.5827	20.6573
XLOC_002518	mut-2	13.6134	14.713	14.587	14.4273	12.2235	11.2937	42.9134	37.9445
XLOC_002521	ZC328.2	8.19794	6.10071	10.7539	6.68523	7.73599	8.88805	25.0525	23.3093
XLOC_002522	ZC328.5	0.476896	0.249574	0.664665	0.233105	0	0	1.39113	0.233105
XLOC_002523	ZC328.3	15.1506	15.9222	21.6894	19.5104	23.8361	28.0721	52.7622	71.4186
XLOC_002524	rbx-2	27.3882	26.2839	23.9446	25.7815	25.9303	26.7444	77.6167	78.4562
XLOC_002525	F37E3.2	0.377784	0.235004	0.522067	0.523538	0.219083	0.166597	1.13485	0.909218
XLOC_002526	F37E3.3	20.0185	18.5797	1.76846	15.2524	13.9063	1.02898	40.3667	30.1877
XLOC_002528	T23H2.3	23.2895	24.7008	22.1526	24.3474	23.2268	23.3413	70.1429	70.9155
XLOC_002529	T23H2.4	3.63362	3.75076	4.47369	4.78158	6.37921	2.9399	11.8581	14.1007
XLOC_002531	rab-10	172.115	163.191	156.694	164.931	181.251	152.365	492	498.547
XLOC_002532	acdh-3	122.506	128.577	145.479	115.871	118.175	172.264	396.562	406.31
XLOC_002533	cdc-25.1	36.8624	39.034	27.9925	30.9634	24.1858	24.9282	103.889	80.0774
XLOC_002534	K06A5.8	2.13759	1.47507	3.24272	1.98579	2.67903	3.75256	6.85538	8.41738
XLOC_002536	dbr-1,mdt-18	64.0704	64.137	79.0349	65.3635	62.9668	77.1539	207.242	205.484
XLOC_002537	C55B7.10	17.2073	16.5805	2.61509	16.2471	14.6115	1.40281	36.4029	32.2614
XLOC_002538	C55B7.11	14.9882	14.51	10.9583	13.4617	13.4882	8.90354	40.4565	35.8534
XLOC_002539	che-1	0	0	0.231346	0.165367	0	0	0.231346	0.165367
XLOC_002540	T10E9.5	0.423838	0	0	0	0.205818	0.238809	0.423838	0.444627
XLOC_002542	T10E9.6	11.2461	7.3837	1.77611	7.84793	11.5663	0.35334	20.4059	19.7676
XLOC_002543	nuo-2	238.421	226.66	316.088	228.306	217.615	319.12	781.169	765.041
XLOC_002544	T10E9.8	9.59049	8.71943	15.4047	11.9147	11.4388	18.0793	33.7146	41.4328
XLOC_002545	F57B10.8,acdh-4	36.8814	30.8457	22.6194	27.1351	34.735	24.234	90.3465	86.1041
XLOC_002546	F57B10.9	6.94278	8.00103	8.05388	7.18997	6.58127	7.70102	22.9977	21.4723
XLOC_002547	F57B10.14	1169.19	1246.25	1586.78	1146.85	1300.46	1599.24	4002.22	4046.55
XLOC_002548	dad-1	506.486	482.261	520.754	524.099	522.627	532.807	1509.5	1579.53
XLOC_002549	bag-1	62.6167	59.0454	60.4715	57.1279	59.3244	58.4859	182.134	174.938
XLOC_002550	mei-2	31.1582	26.187	11.3547	21.0816	17.9296	10.8873	68.6999	49.8985
XLOC_002553	D2092.5	22.8208	23.5042	19.3767	20.8532	20.7251	21.1488	65.7017	62.7271
XLOC_002554	D2092.4	59.5057	67.0433	77.1485	63.6036	65.7398	82.8341	203.697	212.178
XLOC_002555	acr-11	2.28766	1.77798	2.91702	2.48963	2.99815	2.95505	6.98266	8.44283
XLOC_002556	ppfr-2	26.7733	24.6638	22.362	26.3285	25.2186	22.4266	73.7991	73.9737
XLOC_002557	D2092.10	0.781658	0	0	0	0	0	0.781658	0
XLOC_002558	D2092.1	10.1282	8.69057	5.76329	8.28301	8.33233	4.59654	24.5821	21.2119
XLOC_002559	try-7	9.5099	10.5559	1.18814	8.61461	8.27031	0.841165	21.2539	17.7261
XLOC_002560	ZC581.10	33.1429	26.8373	5.99868	23.5577	28.3631	3.36667	65.9789	55.2875
XLOC_002562	ZC581.7	21.7711	19.5168	7.17641	17.815	15.6238	2.88753	48.4643	36.3263
XLOC_002563	ZC581.9	4.59392	4.1933	3.96099	4.75059	4.79182	5.57869	12.7482	15.1211
XLOC_002565	ckr-1	0.960136	0.63511	1.43191	0.602606	0.844587	1.04751	3.02716	2.4947
XLOC_002567	T23B3.5	176.789	155.421	13.6533	127.245	111.931	7.01706	345.863	246.193
XLOC_002568	T23B3.6	0.471292	0.737695	2.82543	1.32344	0.382458	2.25496	4.03442	3.96086
XLOC_002569	W02D3.4	42.6356	45.9556	47.5778	39.6259	38.8012	47.874	136.169	126.301
XLOC_002570	lbp-6	1309.04	1363.52	1842.23	1549.4	1689	2334.34	4514.79	5572.74
XLOC_002571	ant-1.2	0.18133	0.186039	0.625994	0.0890198	0.173626	0.599911	0.993363	0.862557
XLOC_002572	lbp-5	191.526	202.587	79.9736	129.526	142.056	101.86	474.087	373.442
XLOC_002573	smg-5	11.1129	8.99445	8.91947	9.19188	9.89641	9.34067	29.0268	28.429
XLOC_002574	unc-37	18.2468	19.7359	22.3136	19.5753	19.7793	23.3823	60.2963	62.7369
XLOC_002575	fnci-1	12.5025	11.552	12.3084	12.7726	12.3193	12.1816	36.3629	37.2735
XLOC_002576	hrpf-1	32.8102	31.1709	24.3655	34.3315	27.6067	32.459	88.3466	94.3972
XLOC_002577	F08B6.3	20.8391	24.1069	30.2843	27.5987	32.6267	35.6295	75.2303	95.8549
XLOC_002578	unc-87	599.453	657.135	659.303	564.167	573.809	629.814	1915.89	1767.79
XLOC_002579	pqn-21	9.71401	10.9263	12.5153	9.31148	9.3094	12.0302	33.1556	30.6511
XLOC_002580	C37A2.6	7.12934	6.44682	9.36176	4.20199	4.63417	8.88122	22.9379	17.7174
XLOC_002581	C37A2.7	4575.81	5055.91	3664.07	4551.74	4546.68	4438.83	13295.8	13537.2
XLOC_002583	C37A2.8	24.3781	23.606	24.4901	25.4021	21.8794	23.0008	72.4742	70.2823
XLOC_002584	K02F2.5	17.2066	15.3724	21.1881	21.2003	18.3096	19.1745	53.7671	58.6844
XLOC_002585	ser-3	2.86297	1.85078	3.63799	3.26745	3.04926	3.8772	8.35174	10.1939
XLOC_002587	H27M09.5	8.32486	6.72697	0.223236	6.76049	5.52254	0.264259	15.2751	12.5473
XLOC_002590	T21G5.4	73.986	71.2388	7.87235	58.1687	49.3804	4.26505	153.097	111.814
XLOC_002591	asd-2	46.2409	43.9874	61.5599	53.7608	51.6988	53.5068	151.788	158.966
XLOC_002592	srb-15	0.153324	0	0.21352	0.153486	0.148037	0.171999	0.366844	0.473522
XLOC_002593	smg-1	19.7801	19.93	15.9851	18.4577	18.0183	18.361	55.6952	54.837
XLOC_002594	bbs-9	0.333856	0.593056	0.265383	0.564429	0.230201	0.633856	1.19229	1.42849
XLOC_002595	C48B6.10	765.667	803.165	772.271	896.593	953.164	694.085	2341.1	2543.84
XLOC_002596	C48B6.9	1.45072	2.20965	2.19519	1.68471	2.45553	2.60791	5.85556	6.74815
XLOC_002598	T10B11.4	0.495694	0	0	0.384972	0.191184	0	0.495694	0.576156
XLOC_002599	T10B11.5,T10B11.6	29.702	30.4393	39.842	29.5207	37.3686	38.7903	99.9833	105.68
XLOC_002600	T10B11.7	20.1464	18.5597	19.2677	18.4257	18.507	15.943	57.9738	52.8757
XLOC_002601	T10B11.8	12.7762	9.96678	5.71033	10.8669	10.6401	4.62568	28.4533	26.1327
XLOC_002602	C30F12.1	17.4896	17.7434	15.6701	21.691	21.3779	19.9926	50.9031	63.0615
XLOC_002603	C30F12.2	23.1554	22.6521	27.5123	22.0849	25.023	23.9196	73.3198	71.0275
XLOC_002604	C30F12.3	1.12598	2.3333	3.08547	2.19837	1.0866	2.27881	6.54475	5.56378
XLOC_002605	C30F12.4	16.9707	17.6026	7.95774	13.7024	13.389	5.46297	42.531	32.5544
XLOC_002606	C30F12.5	34.7082	30.6498	29.8317	16.933	15.8011	48.4688	95.1897	81.2029
XLOC_002607	H06O01.4	1.14967	1.0684	0.0214577	0.99476	0.746978	1.04463	2.23953	2.78637
XLOC_002608	H06O01.2	16.1306	15.7813	23.5742	16.9547	15.9495	24.0991	55.4861	57.0033
XLOC_002609	pdi-3	754.153	806.571	740.219	834.197	848.796	857.892	2300.94	2540.89
XLOC_002615	W01A8.7	0	0.422601	0.953352	0.40249	0.131589	0.304781	1.37595	0.83886
XLOC_002616	W01A8.2,W01A8.8	28.2631	30.0248	23.9144	25.5686	26.3145	24.4887	82.2023	76.3718
XLOC_002617	W01A8.10	5.42449	4.51539	1.05172	3.66011	3.636	0	10.9916	7.29611
XLOC_002619	nuo-6	377.457	414.176	516.366	426.669	449.914	553.168	1308	1429.75
XLOC_002620	W01A8.6	24.0004	25.9961	21.1461	37.7209	49.3782	9.45147	71.1426	96.5506
XLOC_002622	F22D6.2,kin-14	273.119	274.876	187.617	235.674	232.225	205.478	735.612	673.377
XLOC_002623	nars-1	141.436	138.771	113.091	138.991	121.23	115	393.298	375.221
XLOC_002624	prpf-4	47.0502	47.8379	39.6459	45.8382	43.4354	41.8934	134.534	131.167
XLOC_002626	F22D6.8	17.6335	13.9792	9.65502	14.6051	10.3213	8.63167	41.2677	33.5581
XLOC_002627	F22D6.15	8.47309	7.55809	19.4034	10.198	14.4808	20.2206	35.4346	44.8994
XLOC_002629	K10D3.6	15.4111	10.2594	16.9587	9.76102	9.07934	10.7533	42.6292	29.5937
XLOC_002631	unc-14	24.0971	26.5227	31.4026	23.7135	24.5979	30.6895	82.0224	79.0009
XLOC_002632	H37N21.1,K07G5.6,K10D3.4	105.093	106.544	232.114	130.127	123.437	195.119	443.751	448.683
XLOC_002633	crmL-1	31.0343	30.6322	32.1996	31.8225	30.4423	31.2166	93.8661	93.4814
XLOC_002634	K07G5.4	1.37775	0.719197	0.31648	0.677473	0.781129	0.753687	2.41343	2.21229
XLOC_002635	M05B5.2	82.5274	78.1787	115.174	89.7864	91.0894	90.422	275.88	271.298
XLOC_002636	M05B5.7	17.3113	17.7443	2.20937	13.7974	10.5827	0	37.265	24.3801
XLOC_002638	M05B5.1	19.2428	19.0589	1.50935	14.0111	12.1265	0.45512	39.811	26.5927
XLOC_002640	hlh-2	1.10126	1.35471	1.58056	0.839455	0.83341	1.84915	4.03653	3.52201
XLOC_002641	col-61	12.3122	14.3439	4.57496	11.0322	10.2346	1.21104	31.2311	22.4778
XLOC_002642	C01H6.2,C01H6.3	3.49023	4.22558	13.2268	5.41815	6.87237	14.2176	20.9426	26.5081
XLOC_002643	C01H6.9	9.42911	8.10458	8.10699	8.71124	8.39463	7.81352	25.6407	24.9194
XLOC_002644	R06C7.2	4.37928	4.86285	3.30338	3.61171	3.11618	3.37876	12.5455	10.1067
XLOC_002645	dhp-1	12.7658	10.9756	31.5497	16.1899	17.9856	36.4433	55.2911	70.6188
XLOC_002646	R06C7.5,R06C7.6	98.75	103.689	97.099	99.5597	98.6116	109.911	299.538	308.082
XLOC_002647	lin-61	23.7372	22.2215	20.7314	25.3238	20.4591	17.056	66.6901	62.8389
XLOC_002648	let-75	43.2537	41.9901	37.5505	39.9349	34.2395	27.0937	122.794	101.268
XLOC_002649	twk-1	7.26213	5.67739	7.36826	4.62387	5.6922	7.36363	20.3078	17.6797
XLOC_002650	tyr-3	0.196182	0.102343	0.0677632	0.0958866	0.237773	0	0.366288	0.33366
XLOC_002651	F21C3.7,hint-1	167.408	156.276	187.39	179.583	187.663	197.073	511.074	564.319
XLOC_002653	rde-2	14.8592	14.3871	13.8298	11.971	12.6362	12.3525	43.0761	36.9597
XLOC_002654	pfd-6	152.775	139.688	121.961	154.675	143.614	128.655	414.424	426.944
XLOC_002655	F21C3.6	4.98173	5.63849	0.70981	3.96618	5.21111	0	11.33	9.17729
XLOC_002659	F13G3.3	0.750539	1.35393	7.39698	2.27431	2.15282	8.65227	9.50145	13.0794
XLOC_002660	dylt-1	128.099	129.759	137.24	146.186	169.99	151.474	395.098	467.65
XLOC_002661	ttx-7	76.7842	90.9524	100.338	80.215	92.1624	110.328	268.075	282.705
XLOC_002662	F13G3.6	19.8659	17.2291	19.0415	17.0863	15.2079	16.3549	56.1365	48.6491
XLOC_002663	eat-5	0.919289	0.634775	1.28653	1.48107	1.32403	1.10154	2.84059	3.90664
XLOC_002664	F13G3.10,mif-3	501.6	461.717	395.899	463.221	504.585	419.668	1359.22	1387.47
XLOC_002665	gpb-2	28.9187	30.583	45.0253	34.1852	32.1953	38.0546	104.527	104.435
XLOC_002666	F52A8.3	8.58844	8.74514	5.76372	6.27245	7.0802	3.02379	23.0973	16.3764
XLOC_002668	F52A8.5	219.223	221.142	321.776	211.931	232.104	390.951	762.141	834.986
XLOC_002669	inx-14	28.4956	26.449	17.614	22.4134	19.5028	13.76	72.5586	55.6762
XLOC_002670	F07A5.4	2.24996	1.38236	2.73675	2.14845	2.26894	1.65695	6.36907	6.07434
XLOC_002671	sue-1	3.53628	3.32185	3.19653	3.67913	4.37903	4.30188	10.0547	12.36
XLOC_002672	unc-15	625.175	660.183	551.535	586.262	555.847	532.939	1836.89	1675.05
XLOC_002673	col-35	0.167397	0.180601	0.220427	0.159344	0.0808696	0	0.568425	0.240214
XLOC_002675	sol-1	1.74708	2.30856	3.19945	1.75479	2.38768	1.98733	7.25509	6.1298
XLOC_002676	C15A11.4	4.352	3.77532	1.96189	3.23201	4.12273	0.390838	10.0892	7.74558
XLOC_002677	col-62	179.887	108.141	1.06533	7.58667	9.87292	0.581051	289.093	18.0406
XLOC_002678	lars-2	21.6518	18.8912	25.9419	21.7781	20.4007	28.7659	66.4849	70.9447
XLOC_002679	ZK524.4	13.72	12.304	13.4877	11.3346	10.9076	15.0722	39.5117	37.3144
XLOC_002680	T28F4.1	23.2005	21.5118	34.5925	23.1681	26.1157	31.0837	79.3048	80.3675
XLOC_002681	T28F4.3	10.5766	10.3854	2.52182	9.81724	10.4894	1.17759	23.4838	21.4842
XLOC_002682	T28F4.4	7.266	7.81379	8.52809	7.44481	9.20856	10.4248	23.6079	27.0782
XLOC_002683	T28F4.6	2.48708	2.41132	4.19441	2.93699	2.88511	4.63055	9.09281	10.4527
XLOC_002684	C26C6.8	0.301973	0	0.207945	0.440314	0.721631	0.328167	0.509918	1.49011
XLOC_002686	C26C6.10,C26C6.9	43.3545	43.5658	42.3295	48.6128	52.3194	54.8531	129.25	155.785
XLOC_002687	dcp-66	24.429	25.0453	32.1558	26.7938	25.3768	34.6569	81.6301	86.8275
XLOC_002690	D2030.1	49.8222	48.8012	53.4417	46.6846	49.7819	56.1941	152.065	152.661
XLOC_002691	D2030.3	40.8112	37.5313	25.3141	35.8788	36.9188	22.5595	103.657	95.3571
XLOC_002692	D2030.4	325.277	327.511	334.784	314.581	309.299	375.535	987.572	999.415
XLOC_002693	prg-1	123.905	121.702	98.2989	114.333	102.816	85.912	343.906	303.061
XLOC_002696	capg-1	23.2472	20.607	20.3737	19.6337	20.166	20.5212	64.2279	60.3209
XLOC_002697	F26A3.1,ncbp-2	84.6556	81.8904	80.204	80.6039	85.2337	90.1903	246.75	256.028
XLOC_002698	ego-1,rrf-1	30.8947	26.28	24.9716	28.3295	26.3965	23.5296	82.1463	78.2556
XLOC_002700	F26A3.4	28.2942	26.6904	55.4432	28.3284	26.7816	79.1646	110.428	134.275
XLOC_002701	-	1.15175	1.99777	4.41641	2.03227	1.99781	2.64155	7.56593	6.67163
XLOC_002702	del-3	1.22324	1.34775	1.61141	2.1106	1.48748	0.255432	4.1824	3.85351
XLOC_002703	F26A3.7	19.6336	22.1229	19.4671	21.0146	20.4719	19.6492	61.2236	61.1357
XLOC_002704	T23G11.6	38.4378	37.0746	118.85	61.2028	55.7179	154.981	194.362	271.902
XLOC_002705	T23G11.1	184.772	176.443	12.9148	138.813	121.987	5.52195	374.13	266.322
XLOC_002706	lsy-22	26.7503	29.0144	27.1429	28.486	25.4886	27.0589	82.9076	81.0335
XLOC_002708	F27D4.7	32.8077	29.6579	27.0285	31.6354	36.2779	26.0231	89.4941	93.9364
XLOC_002710	nsf-1	35.4923	38.037	43.82	37.5462	40.4641	47.6075	117.349	125.618
XLOC_002711	VH15N14R.1	0.328778	0.872055	0.44818	0.315353	0.160397	0.531037	1.64901	1.00679
XLOC_002712	D2005.1	19.1753	21.1559	15.7538	18.0035	15.7264	16.6101	56.085	50.34
XLOC_002713	D2005.6	7.005	5.34924	9.21345	6.50299	8.22323	9.85972	21.5677	24.5859
XLOC_002714	nlp-8	16.2682	16.7826	30.9415	20.5524	20.0132	28.8902	63.9923	69.4558
XLOC_002715	D2005.3	76.7775	81.6759	63.2965	82.1911	69.0155	63.8274	221.75	215.034
XLOC_002716	glna-3	24.5926	23.1158	7.19103	20.0339	17.2504	5.61329	54.8994	42.8976
XLOC_002717	F30F8.1	28.9181	25.7734	15.8648	21.4773	18.9223	11.609	70.5563	52.0086
XLOC_002718	F30F8.5	37.2281	38.9004	24.9379	38.2622	35.3363	21.1527	101.066	94.7512
XLOC_002719	nud-2	52.5526	49.0204	41.1192	48.063	41.3842	37.3502	142.692	126.797
XLOC_002720	R11A5.3	0.639504	0.893893	0.293673	0.206755	0.617077	0.464234	1.82707	1.28807
XLOC_002721	R11A5.6	2.13474	2.35085	4.39781	1.44349	1.79553	3.654	8.8834	6.89302
XLOC_002722	R11A5.7	174.57	191.831	51.9037	170.962	156.108	35.5461	418.305	362.616
XLOC_002725	unc-55	1.23301	1.03469	0.706508	0.501921	0.848021	0.534443	2.97421	1.88438
XLOC_002726	F20G4.2,F55D12.5	41.9036	44.66	14.6353	30.1847	27.5178	12.4895	101.199	70.192
XLOC_002727	smgl-1	25.9868	25.9828	27.9029	26.5396	27.473	29.4027	79.8725	83.4153
XLOC_002728	nmy-2	54.1716	51.6026	42.6569	49.2383	42.8868	41.9155	148.431	134.041
XLOC_002729	glb-26	2.62128	2.28093	3.65122	2.96748	5.54792	6.01335	8.55343	14.5287
XLOC_002730	T22C1.4	5.65876	11.4111	11.3196	8.18177	6.81285	9.71529	28.3895	24.7099
XLOC_002731	jph-1	30.0025	31.2282	33.3539	30.7345	30.7634	25.876	94.5846	87.3739
XLOC_002733	T22C1.8	23.3777	21.741	5.51874	20.9259	15.1556	2.68522	50.6374	38.7667
XLOC_002734	T22C1.12	0	0	0	0	0	0.958111	0	0.958111
XLOC_002735	T22C1.11	8.5895	9.43591	9.57707	12.7347	10.4278	10.0414	27.6025	33.2039
XLOC_002736	H05L14.1	19.9878	18.4384	2.13918	12.7826	13.0506	0.687488	40.5654	26.5207
XLOC_002738	C54G4.4	6.98873	10.4907	6.50125	8.7473	8.75637	2.04938	23.9807	19.553
XLOC_002741	C54G4.3	33.3269	32.3996	6.11417	26.7593	25.4633	3.3925	71.8407	55.6151
[truncated: 16,074 more rows]

## Sheet: all expression PTE 0.05gmL
Gene_Id	Gene	Con1	Con2	Con3	PTE 0.05g/mL-1	PTE 0.05g/mL-2	PTE 0.05g/mL-3
XLOC_000001	nlp-40	192.774	204.427	295.692	249.145	229.561	514.697	692.893	993.403
XLOC_000004	Y74C9A.1	0.328941	0.339265	0.914402	0.532059	0.316593	0.54805	1.58261	1.3967
XLOC_000005	Y48G1C.12	14.7594	12.8435	15.8505	13.8797	12.382	15.1061	43.4534	41.3678
XLOC_000006	pgs-1	13.3372	13.7195	16.7241	11.9756	13.2863	13.6586	43.7808	38.9205
XLOC_000007	csk-1	21.4793	23.7709	21.8875	24.3811	24.4934	18.402	67.1377	67.2765
XLOC_000008	Y48G1C.10,Y48G1C.11	9.66953	10.0236	10.8903	9.698	9.82383	10.2161	30.5834	29.7379
XLOC_000009	Y48G1C.9	38.6973	42.7784	45.7389	32.532	36.4176	50.7348	127.215	119.684
XLOC_000010	Y48G1C.1	14.5595	16.3687	12.4888	15.8697	16.3519	10.6028	43.417	42.8244
XLOC_000012	F53G12.13,F53G12.9,rpl-7	3456.41	3629.07	2745.25	3217.44	3018.26	2862.35	9830.73	9098.05
XLOC_000014	F53G12.8	27.681	25.4854	2.21936	23.4678	24.2978	2.90771	55.3858	50.6733
XLOC_000015	col-45	0.242546	0.351121	0.427073	0.346745	0.232381	0.16837	1.02074	0.747496
XLOC_000016	spe-8	12.4199	10.2769	2.01342	9.45614	8.89458	0.798962	24.7102	19.1497
XLOC_000017	mex-3	47.0738	48.9038	14.3292	32.6029	32.3783	9.96827	110.307	74.9495
XLOC_000018	F53G12.4	0.598422	0.353723	0.586101	0.365085	0.324095	0.45798	1.53825	1.14716
XLOC_000019	duox-2	0.0225227	0.000428554	0.0313712	0.000171379	0.02176	0.0249343	0.0543225	0.0468657
XLOC_000020	F56C11.6	24.9258	24.7118	19.8383	32.0266	30.5235	19.5054	69.4759	82.0555
XLOC_000021	F56C11.5	16.9024	15.3748	27.3599	17.5937	15.9877	27.2788	59.6371	60.8602
XLOC_000022	F56C11.4,K10E9.1,atm-1	7.25458	5.96446	9.07973	8.14336	6.7449	7.55566	22.2988	22.4439
XLOC_000024	Y48G1BL.7	1.20981	1.0181	0.606375	0.592679	1.26099	0.713262	2.83428	2.56693
XLOC_000025	Y48G1BL.1	2.7331	3.78325	4.04864	3.44007	2.79538	2.24124	10.565	8.47669
XLOC_000026	Y48G1BM.2	0.0581548	0	0.409156	0.063309	0.0561108	0.130308	0.467311	0.249728
XLOC_000027	Y48G1BM.1	6.09556	5.33041	4.72824	5.85163	4.819	3.44013	16.1542	14.1108
XLOC_000028	C53D5.2,C53D5.3	5.52429	6.08616	11.862	5.08579	6.57492	3.07774	23.4725	14.7385
XLOC_000029	C53D5.1	16.115	16.2787	15.8487	16.7333	17.8625	14.9312	48.2424	49.527
XLOC_000030	Y48G1A.4	24.2742	27.1506	12.0767	20.8975	22.035	10.9773	63.5015	53.9098
XLOC_000031	Y48G1A.3	25.3091	24.7419	22.9808	25.2111	23.4373	25.1404	73.0318	73.7888
XLOC_000032	Y48G1A.1,Y48G1A.2	7.36202	8.61914	8.37314	8.72011	7.06173	9.02496	24.3543	24.8068
XLOC_000033	rnp-8	27.4225	26.0748	19.6554	22.4994	20.4868	12.954	73.1527	55.9402
XLOC_000034	taf-4	18.0803	18.9437	17.237	18.0456	19.2594	14.5092	54.261	51.8142
XLOC_000035	Y50C1A.1	12.9112	11.4057	10.5705	10.723	9.97743	10.8118	34.8874	31.5122
XLOC_000036	C07F11.2	0.876401	0.626614	0.659548	1.38128	0.519774	1.1238	2.16256	3.02485
XLOC_000037	tol-1	5.26207	5.26824	9.94138	7.12798	7.48393	9.34189	20.4717	23.9538
XLOC_000038	W04C9.4	197.735	196.086	110.588	182.831	164.909	96.2612	504.409	444.001
XLOC_000040	cutl-13	0	0.0696796	0	0.213979	0.189819	0.284412	0.0696796	0.68821
XLOC_000041	W04C9.2,haf-4	224.414	260.413	292.327	255.473	257.337	358.043	777.154	870.853
XLOC_000042	deps-1	51.9956	51.8147	21.9985	43.4735	46.6369	15.6206	125.809	105.731
XLOC_000046	Y65B4BL.1	20.4143	22.313	356.319	65.2584	67.9151	422.184	399.046	555.358
XLOC_000047	Y65B4BR.8	18.2008	16.0293	15.8333	18.3017	19.6725	11.6215	50.0634	49.5957
XLOC_000048	Y65B4BR.5	1323.82	1430.7	946.653	1254.98	1210.98	995.213	3701.17	3461.17
XLOC_000049	wwp-1	87.4058	88.4959	64.0977	86.4151	81.6975	66.9673	239.999	235.08
XLOC_000050	ptr-21	20.9111	21.1974	23.1319	33.1441	32.936	43.5106	65.2404	109.591
XLOC_000052	lpr-1	4.57914	5.34973	53.0861	8.13849	8.21342	80.7671	63.015	97.119
XLOC_000053	Y65B4BR.1	0	0.257733	0.32473	0	0.0774589	0.0843439	0.582463	0.161803
XLOC_000055	sago-2	16.1064	17.7808	20.7768	24.2648	24.346	29.7645	54.664	78.3753
XLOC_000056	Y65B4A.4	1.00243	1.02959	5.58228	6.44366	3.82677	6.05227	7.6143	16.3227
XLOC_000057	vps-20	85.9388	98.6007	78.8175	93.4682	83.8769	86.5141	263.357	263.859
XLOC_000058	Y65B4A.2	21.5186	23.722	9.14058	17.8502	17.9119	8.62597	54.3812	44.3881
XLOC_000059	Y65B4A.1	29.9178	28.478	31.1109	27.7438	29.1625	27.7019	89.5067	84.6082
XLOC_000060	Y18H1A.11	22.0898	23.0089	4.23719	16.6573	13.8754	2.33907	49.3359	32.8718
XLOC_000061	Y18H1A.1	6.32077	7.741	0.337525	5.51176	4.78206	0.176282	14.3993	10.4701
XLOC_000062	pif-1	6.32291	5.79131	5.80106	5.21586	5.21754	4.83751	17.9153	15.2709
XLOC_000063	col-47	1.01218	1.22436	13.348	1.54597	2.62057	23.5638	15.5845	27.7303
XLOC_000065	Y18H1A.8	3.93246	5.88046	1.85905	7.62851	3.5057	1.24485	11.672	12.3791
XLOC_000067	T06A4.3	58.5462	65.953	77.0674	65.436	62.6402	78.4018	201.567	206.478
XLOC_000068	T06A4.1	5.3179	6.12764	21.7497	12.4808	14.8455	9.06875	33.1952	36.395
XLOC_000069	T06A4.5	2.68805	0	3.55232	0	0	0	6.24037	0
XLOC_000071	ZC123.1,ZC123.3	9.72702	10.1001	80.7776	32.797	34.7875	73.0011	100.605	140.586
XLOC_000079	Y95B8A.7,Y95B8A.8	34.7796	37.3487	33.205	31.2896	37.1614	31.4587	105.333	99.9097
XLOC_000080	Y95B8A.6	4.89671	3.99372	4.46057	3.70979	4.52368	7.58573	13.351	15.8192
XLOC_000081	gpa-16	27.8629	25.869	24.1286	24.6593	28.6779	17.4652	77.8605	70.8024
XLOC_000082	Y95B8A.4	17.5963	13.4729	3.11631	12.9549	14.025	0.616217	34.1855	27.5961
XLOC_000084	Y95B8A.2,nas-30	123.798	148.712	11.703	43.1901	28.7304	3.69756	284.213	75.6181
XLOC_000086	hmbx-1	3.6446	5.8072	4.22571	0.851793	0.814468	3.86645	13.6775	5.53271
XLOC_000087	C54G6.3	0	2.39968	0	1.2528	0	2.47484	2.39968	3.72764
XLOC_000089	C54G6.2	1.39749	1.48108	0.744213	1.65337	1.17772	0.871454	3.62278	3.70254
XLOC_000090	spp-17	1153.51	1323.52	1103.19	1736.97	1697.58	1910.16	3580.22	5344.71
XLOC_000091	spp-23	102.631	118.863	215.912	201.165	205.885	266.569	437.406	673.619
XLOC_000092	Y34D9A.3	11.0327	11.1535	10.6831	9.87979	9.69403	8.16534	32.8693	27.7392
XLOC_000093	Y34D9A.7	10.4228	11.2079	9.3368	10.1194	10.3233	8.77159	30.9675	29.2143
XLOC_000094	glrx-10	223.557	225.447	230.469	231.524	220.268	267.6	679.473	719.392
XLOC_000095	Y34D9A.2	3.54204	4.70599	3.31928	3.58068	3.62223	4.00765	11.5673	11.2106
XLOC_000096	gsa-1	9.588	9.14543	10.33	9.81993	10.2064	10.2514	29.0634	30.2777
XLOC_000097	R06A10.1,R06A10.5	6.60162	7.52601	1.22053	4.34722	2.5361	1.44296	15.3482	8.32628
XLOC_000098	ZK993.2	0	0.102336	0	0	0	0.110165	0.102336	0.110165
XLOC_000100	ceh-45	1.23701	0.434567	0.742546	0.884026	0.91993	0	2.41412	1.80396
XLOC_000102	rpl-17	3609.14	3882.21	3073.32	3592.43	3404.84	3456.34	10564.7	10453.6
XLOC_000103	Y48G8AL.7	8.17202	8.9046	9.12912	9.00289	9.17608	6.02985	26.2057	24.2088
XLOC_000104	smg-2	37.2383	36.4666	25.0871	32.4923	35.0394	30.6436	98.792	98.1753
XLOC_000105	Y48G8AL.1,Y48G8AL.15,Y48G8AL.5	67.1584	68.9621	50.7879	58.0346	56.1917	45.3165	186.908	159.543
XLOC_000107	Y48G8AR.2	0.659035	0.899231	1.06529	0.624266	0.677358	0.986628	2.62356	2.28825
XLOC_000108	Y48G8AR.3	0	0.349853	0	0	0	0	0.349853	0
XLOC_000109	dapk-1	25.6466	26.3628	24.8749	23.0579	24.4078	26.8949	76.8843	74.3606
XLOC_000110	K12C11.5	8.5351	9.71003	1.14846	8.91957	7.96484	0	19.3936	16.8844
XLOC_000111	K12C11.3,K12C11.6,K12C11.7	36.7388	46.3661	27.953	30.3965	27.7417	38.0313	111.058	96.1695
XLOC_000112	smo-1	208.271	195.594	169.703	190.344	179.271	159.537	573.568	529.152
XLOC_000113	Y92H12BL.1	25.6635	25.8712	20.2463	23.3931	23.9154	18.3741	71.781	65.6826
XLOC_000114	Y92H12BL.5	16.1762	16.3763	14.6844	14.818	14.3736	15.3088	47.2369	44.5004
XLOC_000116	Y92H12BR.7	8.52155	7.21702	6.56031	8.25816	8.14632	6.56672	22.2989	22.9712
XLOC_000117	set-29	17.9271	19.6308	20.9155	18.3689	17.8109	21.0913	58.4734	57.2711
XLOC_000118	Y92H12BR.3	58.5336	51.942	59.3388	54.3439	58.2009	73.7541	169.814	186.299
XLOC_000119	Y92H12BR.8	85.1289	83.4682	77.8698	76.0693	79.8483	86.6025	246.467	242.52
XLOC_000120	spe-15	35.8494	35.2195	7.39285	30.7711	31.095	5.72299	78.4617	67.5891
XLOC_000122	F47G6.3	12.9344	14.1901	3.22781	10.5631	15.0464	2.05658	30.3523	27.6661
XLOC_000123	acs-16	11.1345	13.5724	14.0665	14.4163	12.8254	10.0929	38.7734	37.3346
XLOC_000124	dyb-1	3.47402	4.13517	4.53929	4.14234	3.75501	4.22482	12.1485	12.1222
XLOC_000125	Y92H12A.3,Y92H12A.4	6.88919	9.6243	8.59995	6.52281	6.11938	7.6098	25.1134	20.252
XLOC_000126	Y92H12A.2	27.092	29.2216	15.5156	22.8235	22.2664	14.0939	71.8292	59.1838
XLOC_000127	src-1	22.0698	19.5091	28.5282	22.6179	23.7087	33.4307	70.1071	79.7573
XLOC_000129	Y73E7A.3	16.73	14.4145	18.8067	17.683	18.8566	20.4112	49.9512	56.9508
XLOC_000130	Y73E7A.2	13.2489	13.97	12.1195	12.2894	14.1051	11.1282	39.3384	37.5227
XLOC_000131	adpr-1	11.8016	11.1494	10.5851	12.4266	12.4055	11.3949	33.5361	36.227
XLOC_000132	Y73E7A.1	75.4915	84.724	67.1112	73.7685	81.085	75.4917	227.327	230.345
XLOC_000133	Y73E7A.8	2.06722	2.53845	45.5303	3.85105	3.82468	67.9467	50.136	75.6224
XLOC_000134	Y71G12B.18	18.7658	14.8195	0	33.6559	26.2694	0	33.5853	59.9253
XLOC_000136	Y71G12B.17	33.1556	33.4596	54.2085	43.8643	46.8546	49.792	120.824	140.511
XLOC_000137	drag-1	4.50612	5.80076	7.40339	6.07317	5.76677	6.21967	17.7103	18.0596
XLOC_000138	ubc-3	93.4215	103.051	67.2782	80.3978	79.7252	63.4125	263.751	223.535
XLOC_000140	lsm-6	83.3746	85.9022	82.3634	93.8458	92.8009	101.434	251.64	288.081
XLOC_000141	Y71G12B.13	14.484	16.1882	16.4367	14.5743	14.3225	13.9909	47.1089	42.8877
XLOC_000142	atg-5	22.2551	22.0594	23.8929	24.5708	21.3099	31.8279	68.2074	77.7086
XLOC_000143	Y71G12B.11	54.6261	54.8708	60.2186	67.1315	70.7063	54.3081	169.716	192.146
XLOC_000144	Y71G12B.10	47.5404	46.9617	63.0742	45.9295	44.1027	66.9442	157.576	156.976
XLOC_000145	lin-65	10.3679	10.3552	7.50802	8.90714	8.70112	7.23275	28.2311	24.841
XLOC_000146	Y71G12B.8	46.4487	48.3372	26.8146	42.5601	42.9617	25.21	121.6	110.732
XLOC_000148	Y71G12B.6	10.2506	10.7289	78.1042	16.3438	18.0857	118.009	99.0837	152.439
XLOC_000149	Y71G12B.5	0.0907006	0.158048	0.0829227	0.0326699	0	0.163178	0.331671	0.195848
XLOC_000150	pghm-1	30.7339	34.1681	52.768	30.7054	31.1667	42.3173	117.67	104.189
XLOC_000151	Y71G12B.3	26.2656	23.0361	3.81798	19.7688	23.3886	2.30151	53.1197	45.4589
XLOC_000152	Y71G12B.2	0.75773	0.554869	0.902714	1.31438	1.33135	2.43044	2.21531	5.07617
XLOC_000153	Y71G12B.1	30.856	31.0725	36.7267	32.0511	35.2069	37.1884	98.6552	104.446
XLOC_000154	Y71G12B.28	0.649295	0.338639	0	0	0.00113433	0.724934	0.987934	0.726068
XLOC_000155	C53H9.2	180.403	185.141	112.752	164.639	149.353	90.1332	478.296	404.125
XLOC_000156	rpl-27	5519.37	5674.29	4759.14	5625.04	5269.4	5173.99	15952.8	16068.4
XLOC_000157	egl-30,emr-1	83.8364	96.6918	97.1375	94.1214	97.5874	98.7702	277.666	290.479
XLOC_000158	nlp-12	34.6205	34.76	61.9504	37.9794	26.3086	115.445	131.331	179.733
XLOC_000159	tag-96	12.5652	13.7083	11.6787	11.6963	12.9994	12.5856	37.9522	37.2813
XLOC_000160	tub-2	15.6196	17.4091	19.5149	18.0719	17.15	19.8726	52.5436	55.0945
XLOC_000161	Y51F10.6,Y71G12A.2	4.46219	5.11057	7.20397	6.48403	4.98468	6.37241	16.7767	17.8411
XLOC_000162	Y51F10.4,hex-4	28.3271	25.8195	32.9054	31.0698	24.8145	30.9102	87.052	86.7945
XLOC_000163	Y51F10.11	6.65649	8.9079	7.18529	7.63314	8.46824	8.08963	22.7497	24.191
XLOC_000164	Y51F10.3	25.6517	28.2032	25.3509	27.019	27.3054	26.8998	79.2058	81.2242
XLOC_000166	Y51F10.2	24.4109	20.6419	6.27419	14.7449	15.6174	4.82277	51.327	35.1851
XLOC_000167	Y20F4.2	11.219	13.1484	11.6663	10.5274	9.86706	12.4139	36.0337	32.8084
XLOC_000168	arl-13,moag-4,rpb-10	317.799	337.421	341.354	391.285	340.94	383.981	996.574	1116.21
XLOC_000170	phb-1	351.66	371.459	578.402	332.191	341.922	641.174	1301.52	1315.29
XLOC_000171	Y37E3.10	205.063	202.157	230.676	189.992	197.573	243.442	637.896	631.007
XLOC_000172	Y37E3.11	50.8272	59.1259	47.9717	57.5821	49.9773	52.8103	157.925	160.37
XLOC_000174	npp-13	33.333	34.8338	33.3994	34.9004	33.5678	33.5902	101.566	102.058
XLOC_000175	Y37E3.17	110.022	116.504	123.728	108.719	109.925	129.758	350.254	348.402
XLOC_000179	afd-1	18.6089	20.6654	27.3857	27.5755	26.3437	19.6818	66.66	73.601
XLOC_000180	W03F11.5	1.72786	2.11154	6.59918	1.74391	2.76938	11.735	10.4386	16.2483
XLOC_000181	lgc-51	0	0.0830454	0.108321	0	0.075879	0.0848903	0.191366	0.160769
XLOC_000182	F12B6.2	14.2782	12.5402	12.4173	6.7349	8.1522	17.6345	39.2357	32.5216
XLOC_000185	Y39G10AL.1	0.249111	0.260658	0.335071	1.33021	0.475148	0.266544	0.84484	2.0719
XLOC_000186	Y39G10AR.11	22.0322	21.5825	18.1459	21.0653	19.8916	17.8145	61.7606	58.7714
XLOC_000187	epg-2	9.39328	9.17698	10.0634	10.2773	9.99391	8.07022	28.6337	28.3414
XLOC_000188	Y39G10AR.21,Y39G10AR.9	34.7466	38.4878	50.4982	33.5613	30.1347	52.5076	123.733	116.204
XLOC_000189	Y39G10AR.20	69.149	64.8925	72.9001	66.7604	70.244	76.056	206.942	213.06
XLOC_000190	Y39G10AR.8	193.627	195.259	135.969	178.992	173.913	151.397	524.855	504.302
XLOC_000191	Y39G10AR.7	10.706	10.1666	7.38535	10.1152	11.566	3.94963	28.2579	25.6308
XLOC_000192	srbc-64	0	0.185849	0	0	0	0	0.185849	0
XLOC_000193	ugt-31	5.58633	4.54975	2.74577	4.8151	4.76638	3.42902	12.8819	13.0105
XLOC_000194	zeel-1	0	0	0.0518139	0.040491	0	0	0.0518139	0.040491
XLOC_000196	Y39G10AR.25	35.1853	27.6845	2.69064	21.9726	29.8026	2.01737	65.5604	53.7926
XLOC_000197	nekl-1	0.270347	0.344162	0.376545	0.194687	0.289758	0.460313	0.991054	0.944758
XLOC_000199	zwl-1	26.8078	23.1322	14.6745	23.2432	23.4681	14.61	64.6145	61.3213
XLOC_000201	F23C8.13	2.94233	1.67929	3.11188	1.71304	2.68488	2.99056	7.7335	7.38848
XLOC_000202	ubxn-1	54.653	52.3881	42.9726	51.2974	47.8736	52.2406	150.014	151.412
XLOC_000203	F23C8.3	2.39257	1.88239	7.40757	4.27417	3.31317	8.38525	11.6825	15.9726
XLOC_000205	F23C8.1	3.49916	2.55228	0.529648	2.98782	2.37294	0.952023	6.58109	6.31278
XLOC_000206	Y74C10AR.2	0	1.41975	0.308469	0.730007	0.216146	0.241635	1.72822	1.18779
XLOC_000207	eif-3.I	167.761	180.729	147.369	165.294	161.397	149.459	495.859	476.15
XLOC_000208	Y23H5B.6	44.0678	47.0341	32.9084	42.8535	39.7987	25.5292	124.01	108.181
XLOC_000209	Y23H5B.5	47.368	45.7849	26.2577	38.9585	40.6065	24.0884	119.411	103.653
XLOC_000212	Y23H5B.4	1.69091	1.31903	1.80986	1.58947	2.04619	1.33663	4.8198	4.97229
XLOC_000213	Y23H5B.3	1.8523	1.20304	3.2001	1.7478	1.11317	2.27119	6.25544	5.13216
XLOC_000214	Y23H5B.2	4.29705	7.28247	2.17904	6.37548	5.71421	0.746458	13.7586	12.8361
XLOC_000215	Y23H5B.1	2.40648	2.51665	1.51823	0.595796	0.883938	3.54033	6.44136	5.02006
XLOC_000216	Y23H5B.12	3.01299	2.38736	1.00918	5.03008	3.89219	0.480909	6.40953	9.40318
XLOC_000217	C55C2.4	3.87033	3.67665	0.972082	3.64134	3.21135	0.194073	8.51906	7.04676
XLOC_000218	C55C2.3	3.30712	4.09626	0.220697	1.718	2.44515	0.875282	7.62408	5.03843
XLOC_000219	ssp-19	12.9359	6.00078	1.39063	5.01286	3.98765	0	20.3273	9.00051
XLOC_000221	K07A3.3	15.8053	13.7697	1.78357	13.7872	13.6953	0.735764	31.3586	28.2183
XLOC_000222	ctn-1	9.91309	10.9112	18.1956	14.1542	14.5768	18.3679	39.0199	47.0989
XLOC_000224	Y23H5A.4	15.2708	15.2634	2.64493	14.5506	14.6567	1.67969	33.1791	30.887
XLOC_000225	Y23H5A.3	64.9034	63.1647	39.9175	61.4425	62.0849	33.6406	167.986	157.168
XLOC_000226	Y23H5A.2	7.36995	6.26712	6.49932	5.99449	6.38384	8.39611	20.1364	20.7744
XLOC_000227	Y23H5A.1	4.10821	3.10839	8.55973	4.34795	4.44412	7.90561	15.7763	16.6977
XLOC_000228	Y23H5A.8	1.42052	0.939301	2.89879	1.15455	1.72034	1.92774	5.25861	4.80263
XLOC_000229	F40E3.7	1.52345	0.914366	2.35971	2.81141	1.24562	1.37514	4.79753	5.43217
XLOC_000230	F40E3.3	0.488831	0	0	0	0	0	0.488831	0
XLOC_000231	F40E3.2	32.5331	34.8723	34.3908	30.362	32.0125	33.5707	101.796	95.9452
XLOC_000233	F32B5.6	29.881	29.9083	33.2255	30.0046	25.4193	30.8619	93.0148	86.2858
XLOC_000238	F32B5.4	85.3939	79.0047	2.60665	53.377	58.3691	1.02912	167.005	112.775
XLOC_000239	F32B5.3	1.03861	0.869437	0	0.33759	0.70131	0	1.90805	1.0389
XLOC_000240	F32B5.2	0.851751	1.21933	0.744506	1.15615	1.85167	1.06458	2.81559	4.0724
XLOC_000241	F32B5.1	94.3436	97.1704	77.5139	94.033	90.4035	76.484	269.028	260.921
XLOC_000243	lin-17	12.8675	13.3889	16.9435	13.4	11.4051	19.7139	43.1999	44.519
XLOC_000244	snr-7	405.945	367.839	308.311	428.023	356.743	375.37	1082.1	1160.14
XLOC_000245	yop-1	229.224	224.725	196.736	208.155	194.534	186.604	650.685	589.293
XLOC_000246	Y71F9B.2	27.3764	22.4179	30.9488	22.0302	25.8516	31.453	80.7431	79.3348
XLOC_000252	Y71F9B.1	22.6571	18.314	51.7357	20.2549	14.9977	70.4023	92.7068	105.655
XLOC_000253	W03D8.10	24.5178	23.0506	6.91799	17.7469	19.3108	3.13809	54.4864	40.1958
XLOC_000254	W03D8.8	7.30947	7.00094	10.4275	10.5624	7.33557	11.9834	24.7379	29.8814
XLOC_000255	W03D8.7	2.01961	1.39261	0	0.959538	0.859481	0	3.41222	1.81902
XLOC_000257	itx-1	17.0571	19.1479	20.5265	20.8514	19.8593	33.7761	56.7315	74.4868
XLOC_000258	W03D8.5	13.1816	12.6096	1.71443	8.92698	9.84985	0.494623	27.5056	19.2715
XLOC_000259	W03D8.11	1.0882	1.40738	23.5729	2.33528	3.49958	26.5376	26.0685	32.3725
XLOC_000265	ccb-2	0.388206	0.204057	0.536968	0.21056	0.187439	0	1.12923	0.397999
XLOC_000268	Y71F9AL.10	15.0149	13.843	20.4658	12.4987	13.7356	15.5423	49.3237	41.7766
XLOC_000269	Y71F9AL.9	337.623	356.009	306.911	315.53	300.351	362.45	1000.54	978.331
XLOC_000270	Y71F9AL.8	11.6756	14.5533	12.0313	11.3169	13.944	7.47123	38.2602	32.7321
XLOC_000271	Y71F9AL.7	0	0	0	0	0.108424	0	0	0.108424
XLOC_000272	Y71F9AL.6	0	0	0.210224	0	0.291881	0.330664	0.210224	0.622545
XLOC_000273	gst-43	24.9898	25.9121	27.4346	20.0954	27.2468	34.3704	78.3365	81.7126
XLOC_000274	Y71F9AL.4	8.0793	8.7284	3.71054	7.7018	7.7552	2.36547	20.5182	17.8225
XLOC_000275	Y71F9AL.2	16.7994	14.7621	2.86239	14.1269	13.0966	2.11528	34.4239	29.3388
XLOC_000276	Y71F9AL.1	14.2252	13.9809	12.5786	11.3177	11.2956	11.5869	40.7847	34.2002
XLOC_000277	trap-1	737.421	800.07	601.036	734.471	667.18	672.074	2138.53	2073.72
XLOC_000278	nxt-1	97.8016	108.871	88.538	100.222	98.66	95.5551	295.211	294.437
XLOC_000279	cogc-3	16.199	16.0245	22.898	19.1598	18.3973	22.6135	55.1215	60.1706
XLOC_000282	dnj-28	21.063	18.6207	8.46773	18.3063	21.6688	5.77213	48.1514	45.7472
XLOC_000283	Y54E10BL.3	3.42643	2.89977	3.18044	2.45417	2.25835	2.7827	9.50664	7.49522
XLOC_000285	col-48	528.259	646.438	593.424	848.614	847.45	469.922	1768.12	2165.99
XLOC_000286	Y54E10BL.1	1.91408	0.663301	0.843179	0	0	0	3.42056	0
XLOC_000287	Y54E10BR.4	73.3615	72.0092	41.3823	70.7433	65.4733	41.9754	186.753	178.192
XLOC_000288	Y54E10BR.3	48.8731	44.2095	41.2464	42.6633	43.7027	37.3889	134.329	123.755
XLOC_000289	Y54E10BR.2	19.9161	21.5841	19.8419	18.5062	23.1542	18.6277	61.3421	60.2881
XLOC_000290	Y54E10BR.1	13.2101	12.4667	12.2974	14.0816	15.259	12.3482	37.9742	41.6888
XLOC_000292	nhr-64	8.27935	8.74127	14.0182	8.78234	7.40862	15.0156	31.0388	31.2066
XLOC_000294	col-49	1310.74	1557.14	856.728	1846.29	1754.04	489.037	3724.61	4089.37
XLOC_000295	K09H9.2	11.1271	10.74	14.0402	9.91203	9.36421	11.6231	35.9073	30.8993
XLOC_000296	K09H9.1	0.0908961	0	0.12674	0.0985048	0.086624	0	0.217636	0.185129
XLOC_000297	Y54E10A.6,Y54E10A.7	61.9637	64.0832	66.5222	59.4116	57.0269	62.4112	192.569	178.85
XLOC_000298	dnc-6	36.5939	35.5836	35.1071	36.3139	35.6662	39.6802	107.285	111.66
XLOC_000299	Y54E10A.17	102.658	116.635	194.953	84.2268	104.264	229.503	414.246	417.994
XLOC_000300	fog-1	4.57388	4.47277	7.75321	3.49965	3.90524	6.57572	16.7999	13.9806
XLOC_000301	Y54E10A.3,cogc-1	84.5186	82.3245	81.3567	83.4899	81.685	80.9763	248.2	246.151
XLOC_000302	Y54E10A.24	0	0	0	164.621	0	0	0	164.621
XLOC_000305	tyr-5	0.815377	0.611082	0.649698	0.709902	1.35041	0.516494	2.07616	2.57681
XLOC_000307	nol-5	429.394	432.374	203.78	373.652	378.959	178.854	1065.55	931.465
XLOC_000309	sulp-6	9.87676	9.55382	2.5313	7.2697	8.5324	1.91364	21.9619	17.7157
XLOC_000310	W01B11.1	5.49226	16.232	2.17485	10.6732	9.47926	1.13094	23.8991	21.2834
XLOC_000311	Y44E3A.1	22.9481	14.7131	21.0119	28.91	27.3859	23.2249	58.6731	79.5208
XLOC_000312	W05F2.7	0.799568	1.24993	1.82909	1.35071	1.30154	1.47538	3.87859	4.12763
XLOC_000313	W05F2.8	0.0858824	0.855565	0.534204	0.0158656	0.0628886	0.00218748	1.47565	0.0809417
XLOC_000314	W05F2.6	35.8049	32.2835	14.826	27.8066	29.8692	12.7871	82.9144	70.4629
XLOC_000315	fbxa-203	6.85715	7.11811	6.191	6.14338	7.07575	5.38563	20.1663	18.6048
XLOC_000320	cdk-2	13.2887	12.1082	13.1776	11.3591	13.2854	11.5419	38.5745	36.1864
XLOC_000321	K03E5.2	46.5031	46.078	69.0756	35.0184	40.7235	38.5349	161.657	114.277
XLOC_000322	K03E5.1	1.12802	1.16875	0.708525	1.66625	1.46673	1.10792	3.00529	4.2409
XLOC_000323	tag-63	13.8861	11.5365	10.2463	11.1619	10.9912	8.5854	35.6689	30.7385
XLOC_000324	msh-6	33.0881	31.8432	28.8086	29.8523	29.2203	20.0635	93.7399	79.1361
XLOC_000325	spg-7	51.8418	53.7315	69.9215	46.4894	48.1735	76.0979	175.495	170.761
XLOC_000326	Y47G6A.9	42.183	41.4738	48.385	43.5521	41.3334	54.1499	132.042	139.035
XLOC_000327	crn-1	42.069	45.2332	40.0803	40.4966	39.7192	42.5019	127.382	122.718
XLOC_000328	Y47G6A.7	16.9862	16.9004	30.5386	15.601	18.8008	30.7898	64.4252	65.1916
XLOC_000329	pcaf-1	8.91341	8.38966	10.2872	9.159	9.97819	10.9894	27.5903	30.1266
XLOC_000330	Y47G6A.5	15.3375	16.31	15.7874	14.6212	13.5804	18.1724	47.4349	46.374
XLOC_000331	Y47G6A.4	8.70975	7.98592	10.1018	7.84899	8.21539	9.05687	26.7975	25.1212
XLOC_000333	Y47G6A.27	2.05321	1.91088	1.27877	2.04151	3.16901	1.31238	5.24286	6.5229
XLOC_000334	Y47G6A.33	75.0048	43.053	70.5517	41.2006	51.215	70.149	188.609	162.565
XLOC_000335	Y47G6A.3	30.8998	24.6312	4.09466	20.6744	22.0278	2.65001	59.6257	45.3522
XLOC_000336	Y47G6A.31	0	0	0.900027	0	0.158871	0.176266	0.900027	0.335137
XLOC_000337	inx-22	16.2211	15.9719	7.23381	11.9998	13.8221	5.06594	39.4268	30.8878
XLOC_000338	inx-21	18.8407	15.6002	17.8572	16.3862	18.3569	11.5813	52.2981	46.3244
XLOC_000339	Y47G6A.32	1.35075	1.84433	3.79962	2.14457	3.30125	1.13022	6.9947	6.57604
XLOC_000340	cah-6	4.68426	6.80903	5.57713	4.57104	3.84975	4.02282	17.0704	12.4436
XLOC_000341	T28F2.2	5.14828	6.212	12.0306	5.53969	6.24008	13.9155	23.3909	25.6953
XLOC_000342	T28F2.1	0.329529	0.574569	0.612846	0.120606	0.105814	0	1.51694	0.22642
XLOC_000343	col-51	0.0684482	0	0	0	0	0	0.0684482	0
XLOC_000344	D1037.1	12.164	13.4786	11.7087	13.4141	13.3433	10.8419	37.3513	37.5993
XLOC_000345	hus-1	12.318	12.7879	13.4711	14.0255	11.1414	9.81518	38.577	34.9821
XLOC_000346	-	10.7706	7.26882	5.41708	9.19318	7.32406	4.85536	23.4565	21.3726
XLOC_000347	F21A9.1	1.15087	0.480395	0.964155	1.00591	1.34968	2.55511	2.59542	4.9107
XLOC_000348	glh-4	45.9473	42.2166	28.4098	41.9574	46.3939	22.4541	116.574	110.805
XLOC_000349	T12F5.2	13.3527	15.4395	6.47132	10.2172	12.0507	2.7924	35.2635	25.0603
XLOC_000350	T12F5.1	14.5427	12.7011	10.8681	12.9457	12.0189	12.8066	38.1119	37.7712
XLOC_000352	math-46	0.841728	0.199766	0.24814	0	0.535074	0	1.28963	0.535074
XLOC_000353	asic-1	1.04426	1.3565	1.75742	1.3762	1.73207	1.95373	4.15818	5.062
XLOC_000354	C32E8.6	0.202211	0.48865	0.562528	0.438006	0.582218	1.19404	1.25339	2.21426
XLOC_000355	C32E8.5	36.5498	34.3265	26.798	33.9441	31.2299	24.0794	97.6743	89.2534
XLOC_000356	C32E8.4	71.0918	65.5798	9.30073	49.778	58.9672	4.28158	145.972	113.027
XLOC_000357	C32E8.3	60.1764	60.2336	91.604	67.4366	78.616	98.5796	212.014	244.632
XLOC_000358	rpl-13	3377.44	3637.42	2842.14	3445.37	3202.03	3230.05	9857	9877.45
XLOC_000359	C32E8.1	3.52043	4.19325	0.732434	4.61688	2.82547	0.596412	8.44611	8.03876
XLOC_000360	npp-11	37.3418	36.6601	29.5687	34.8443	37.7238	31.1146	103.571	103.683
XLOC_000361	unc-108	202.536	202.294	218.539	204.724	192.657	255.053	623.369	652.434
XLOC_000362	F53F10.3	116.713	119.832	204.538	105.868	111.295	315.541	441.083	532.704
XLOC_000363	F53F10.8	11.1543	11.0893	15.7881	13.6995	11.763	13.0442	38.0317	38.5067
XLOC_000364	F53F10.2	132.31	133.104	118.406	119.74	112.979	134.712	383.82	367.431
XLOC_000365	T03F1.11	157.794	177.592	213.368	257.915	231.215	93.3859	548.754	582.516
XLOC_000366	pgk-1	145.696	153.775	264.17	155.495	153.084	297.149	563.641	605.728
XLOC_000367	coq-4	18.0466	18.5509	32.2909	16.4872	21.0742	32.2649	68.8884	69.8263
XLOC_000368	T03F1.1	65.2417	62.5965	55.3457	61.9376	60.5828	59.1309	183.184	181.651
XLOC_000369	C50F2.3	47.7359	45.464	42.4352	46.9291	44.8112	45.1596	135.635	136.9
XLOC_000370	C50F2.2	11.1192	10.1657	8.22455	9.42256	8.80751	7.07676	29.5095	25.3068
XLOC_000371	C50F2.1	0	0	0.0942195	0	0	0	0.0942195	0
XLOC_000372	pbs-4	314.211	336.106	282.689	354.974	330.877	319.817	933.006	1005.67
XLOC_000374	T21E3.2	6.35746	5.03986	0.991661	5.43858	3.6282	0	12.389	9.06678
XLOC_000375	egg-4	19.2667	15.9202	4.22823	13.7822	13.1241	2.17055	39.4151	29.0769
XLOC_000376	F47B3.4	23.9518	19.4026	2.97168	20.106	19.1616	1.97645	46.3261	41.2441
XLOC_000377	F47B3.3	0.656337	1.99597	0.326284	0.888651	1.34528	0.344659	2.97859	2.57859
XLOC_000378	F47B3.2	9.47362	6.7677	0.288817	7.27887	5.83349	0.457049	16.5301	13.5694
XLOC_000379	F47B3.1	19.6575	17.9366	5.4946	20.382	16.7965	3.68267	43.0887	40.8612
XLOC_000380	aars-2	97.0905	98.6055	93.1413	95.9453	97.9102	99.5617	288.837	293.417
XLOC_000381	cpn-3	929.608	998.594	1004.46	944.572	872.278	1041.77	2932.66	2858.62
XLOC_000382	F28H1.1	9.26981	6.98475	8.92044	6.30259	6.76181	8.90481	25.175	21.9692
XLOC_000384	unc-89	36.9839	39.8838	29.2076	36.2119	35.764	22.5288	106.075	94.5047
XLOC_000385	C24G7.4	0.752729	0.233358	0.940066	0.486297	0.25843	1.03523	1.92615	1.77996
XLOC_000386	acd-1	2.12833	3.79001	7.62432	4.58938	4.23663	8.6908	13.5427	17.5168
XLOC_000387	C24G7.1	0.228411	0.179457	0.0793442	0.0625849	0.110477	0.379349	0.487212	0.552411
XLOC_000388	cyb-2.2	41.142	34.1342	7.02738	27.3912	28.0891	4.5921	82.3036	60.0724
XLOC_000389	H31G24.3	9.32341	9.81987	5.58791	7.68812	8.93513	4.04962	24.7312	20.6729
XLOC_000390	H31G24.2	0.302668	0.198657	0.259213	0.122558	0.326699	0.325824	0.760538	0.775081
XLOC_000391	H31G24.1	0.74219	0.788344	3.02116	0.809929	0	4.88444	4.55169	5.69437
XLOC_000392	lin-44	7.94721	7.82591	14.2428	9.64119	8.09275	21.5304	30.0159	39.2643
XLOC_000393	E01A2.2	82.2933	82.0439	60.6293	80.9174	79.4747	58.8979	224.966	219.29
XLOC_000394	E01A2.1	50.6686	43.8517	73.9004	58.4087	51.3317	86.9319	168.421	196.672
XLOC_000395	R12E2.14	1953.35	2145.5	241.717	1512.34	1427	52.7848	4340.57	2992.12
XLOC_000396	inx-16	80.7449	80.9972	68.0475	76.6964	73.3798	91.4886	229.79	241.565
XLOC_000397	inx-17	46.128	42.6764	36.7897	40.1501	34.4979	51.1399	125.594	125.788
XLOC_000399	rpn-8	190.471	191.586	167.368	198.686	195.938	172.091	549.425	566.715
XLOC_000401	R12E2.2	38.2183	34.2228	33.7835	33.7249	36.843	30.8207	106.225	101.389
XLOC_000402	R12E2.1	12.2322	12.7884	11.698	12.7039	11.5567	11.0545	36.7186	35.3151
XLOC_000403	cas-2,ppw-1	110.904	113.939	74.7377	108.795	110.193	73.6153	299.581	292.603
XLOC_000404	C18E3.5	33.7751	34.3309	34.7755	31.1832	34.37	23.3295	102.881	88.8827
XLOC_000406	C18E3.3	5.21974	3.67635	4.08824	5.16246	4.76017	5.18499	12.9843	15.1076
XLOC_000407	C18E3.1,C18E3.2	29.5239	30.9032	21.2855	26.7187	29.0113	20.7711	81.7126	76.5011
XLOC_000408	nab-1	14.5442	16.6738	15.6444	18.9114	19.0716	13.7644	46.8624	51.7474
XLOC_000409	C43E11.5	36.7391	35.7548	11.6886	30.8892	34.8344	8.2883	84.1825	74.0119
XLOC_000410	tufm-2	62.3252	63.2534	84.1846	59.3221	57.1082	93.7661	209.763	210.196
XLOC_000411	cogc-5	31.3932	30.4351	42.059	34.4577	34.0656	48.2712	103.887	116.794
XLOC_000412	C43E11.12	26.6429	30.2552	31.6482	28.2733	29.3471	32.4831	88.5463	90.1035
XLOC_000413	met-1	13.0457	11.7229	11.2222	12.2266	11.7745	10.8621	35.9908	34.8632
XLOC_000414	mus-81	20.2641	19.7761	22.1316	19.194	19.7881	19.9731	62.1718	58.9552
XLOC_000415	acin-1	37.7941	38.2362	31.4791	37.5478	39.3233	30.3387	107.509	107.21
XLOC_000416	Y47D9A.3	10.8928	11.5671	1.98618	9.25555	8.96315	0.673987	24.4461	18.8927
XLOC_000417	scpl-3	8.91892	7.88636	4.33096	9.31248	7.05375	5.52757	21.1362	21.8938
XLOC_000418	Y47D9A.1	93.6052	90.3163	216.249	136.108	133.485	206.377	400.17	475.97
XLOC_000420	acr-6,anc-1	20.9025	20.1789	20.1694	17.3193	16.2109	24.2271	61.2508	57.7573
XLOC_000421	ZK973.4	10.5904	9.13091	0.709184	8.89277	8.14342	0.56693	20.4305	17.6031
XLOC_000422	pdp-1	32.2	35.9694	42.5725	39.6663	35.9502	44.0767	110.742	119.693
XLOC_000423	ZK973.2	28.6595	28.6634	23.0202	27.7501	27.7401	20.4568	80.3431	75.947
XLOC_000424	ZK973.1	34.1331	31.613	22.7703	31.2437	28.9989	18.7851	88.5164	79.0277
XLOC_000425	T21E12.3,dhc-1	36.4564	34.6724	30.699	33.6935	33.0321	32.7017	101.828	99.4273
XLOC_000426	T21E12.2,cgef-2	6.9715	7.8681	7.52002	7.18143	8.59441	6.99819	22.3596	22.774
XLOC_000430	eif-3.H	117.509	116.927	92.518	112.897	111.798	88.4288	326.954	313.124
XLOC_000431	eri-6	7.10909	10.9618	7.78906	7.11311	8.05733	8.67435	25.8599	23.8448
XLOC_000432	gcy-28	36.1817	32.8744	36.5056	29.7141	32.033	38.3248	105.562	100.072
XLOC_000433	Y119C1B.12	0.318331	0	0	0	0	0	0.318331	0
XLOC_000434	Y119C1B.3	3.41033	2.42428	1.91343	3.80585	3.24061	2.77075	7.74804	9.81721
XLOC_000435	Y119C1B.1	18.8321	14.752	1.65554	14.3178	18.0743	1.05539	35.2396	33.4475
XLOC_000436	D1007.15	6.98576	6.11057	7.98312	6.06841	6.24164	8.91683	21.0795	21.2269
XLOC_000437	pqn-24	34.1637	35.6078	43.7523	33.8578	41.1329	41.7918	113.524	116.782
XLOC_000438	D1007.13	13.2882	18.7765	1.40493	7.87781	5.29655	0.58289	33.4696	13.7573
XLOC_000440	rpl-24.1	3661.7	3948.04	3278.88	3657.07	3444	3546.71	10888.6	10647.8
XLOC_000441	D1007.20	0	60.4432	0	0	0	0	60.4432	0
XLOC_000442	D1007.10	11.6382	12.4197	14.1715	10.1563	11.5502	16.6415	38.2294	38.348
XLOC_000444	D1007.8,eaf-1	48.153	48.8452	43.7574	47.0149	50.0478	51.8112	140.756	148.874
XLOC_000445	C44E4.5	21.8367	22.0227	27.1667	22.3725	22.9448	31.6154	71.0261	76.9327
XLOC_000446	C44E4.8	2.82972	2.68297	1.68014	1.90349	2.08184	0.741661	7.19283	4.72699
XLOC_000447	C44E4.4	297.405	296.37	164.226	274.007	271.316	144.492	758.001	689.815
XLOC_000449	B0041.3	10.0215	10.0875	13.4669	12.8078	10.5881	14.4854	33.5759	37.8813
XLOC_000450	B0041.8	43.3105	40.0742	30.277	35.8078	34.6068	25.4329	113.662	95.8475
XLOC_000451	ain-2	53.3411	58.6072	61.1026	59.2484	61.2821	58.2484	173.051	178.779
XLOC_000453	B0041.1	10.0983	7.89772	3.85896	9.20888	10.0308	0.523106	21.855	19.7628
XLOC_000454	unc-57	39.6812	43.3565	43.2905	38.8643	40.9253	36.4311	126.328	116.221
XLOC_000455	T04D1.2	0.109397	0.111786	0.782268	0.356725	0.528651	0.86957	1.00345	1.75495
XLOC_000456	W09C3.4	30.6181	31.1826	19.7196	27.1726	28.574	22.2622	81.5203	78.0088
XLOC_000457	W09C3.3	0.489758	0.701841	0.411761	0.426524	0.658018	0.873393	1.60336	1.95793
XLOC_000458	W09C3.2	10.2874	9.96864	2.00611	11.0369	11.2645	1.01386	22.2621	23.3153
XLOC_000459	W09C3.1	10.4131	8.17383	5.73968	9.58969	8.6466	4.596	24.3266	22.8323
XLOC_000460	C10H11.7	11.6908	10.1416	1.34901	7.78998	7.51293	0.358953	23.1814	15.6619
XLOC_000461	ugt-26	43.9088	32.661	25.6354	28.9564	29.0879	40.7649	102.205	98.8092
XLOC_000462	ugt-27	0.276573	0.0717272	0.577906	0.377348	0.200086	0.460907	0.926206	1.03834
XLOC_000463	ugt-28	18.8149	15.5132	10.3705	14.7664	14.1442	12.5437	44.6986	41.4543
XLOC_000464	ugt-25	29.86	30.483	19.3247	38.6894	36.7138	13.6732	79.6677	89.0764
XLOC_000465	viln-1	18.8181	18.1393	13.442	19.2547	17.4133	11.2412	50.3994	47.9092
XLOC_000469	M04F3.2	8.19678	9.12724	8.10219	8.70927	7.44376	4.91509	25.4262	21.0681
XLOC_000470	rpa-2	118.608	116.579	83.2341	102.461	99.8911	79.708	318.421	282.06
XLOC_000472	F54D7.6	580.103	579.747	572.871	661.234	633.118	656.9	1732.72	1951.25
XLOC_000473	F54D7.7	6506.98	6133.93	5602.48	6428.59	5879.78	6256.3	18243.4	18564.7
XLOC_000474	gnrr-1	1.20714	0.566958	0.614445	0.357924	0.735658	0.969058	2.38854	2.06264
XLOC_000475	F54D7.2	87.5011	85.7399	79.7907	96.3222	95.9913	95.5066	253.032	287.82
XLOC_000476	F57C9.6	1.01502	1.27359	2.42103	1.22468	1.28145	1.14726	4.70964	3.65339
XLOC_000477	htp-3	33.6662	32.2328	22.4819	29.7649	31.5308	16.5575	88.3809	77.8532
XLOC_000478	F57C9.3,F57C9.4,clec-90	25.3023	29.7778	23.1113	25.8538	25.5036	19.998	78.1914	71.3554
XLOC_000479	F57C9.1	25.4498	23.0433	35.5276	24.5497	27.1971	40.7923	84.0207	92.5391
XLOC_000482	F25F8.1	4.78756	5.70638	5.7572	5.27898	6.49494	6.55374	16.2511	18.3277
XLOC_000484	F21F3.4	14.6013	9.65174	12.0705	10.0276	11.6803	8.40322	36.3235	30.1111
XLOC_000485	F21F3.3	23.7022	17.2001	13.6646	23.1532	25.1228	7.92086	54.5669	56.1969
XLOC_000486	F21F3.2	13.2192	13.9856	2.58173	12.5051	13.4142	1.14945	29.7865	27.0688
XLOC_000487	pgal-1	66.0515	66.5386	113.349	78.2451	74.4465	89.7142	245.939	242.406
XLOC_000488	F21F3.7	9.72259	11.1084	20.9546	9.55371	10.4241	22.3921	41.7856	42.3699
XLOC_000489	F28B3.5,acl-11	25.402	17.0341	19.8637	20.0586	23.2839	22.9347	62.2998	66.2772
XLOC_000490	F28B3.1,F28B3.4	18.9749	19.3835	17.2568	20.418	19.7236	16.7616	55.6152	56.9032
XLOC_000491	W03G9.3	13.8471	14.4754	10.1198	14.1927	16.777	8.32207	38.4423	39.2918
XLOC_000492	W03G9.2	17.708	18.4424	13.4152	15.1623	17.2007	7.81422	49.5656	40.1772
XLOC_000493	W03G9.9	0.115939	0.120101	0.162292	0.125948	0.336171	0.255408	0.398332	0.717527
XLOC_000494	snf-1	33.6722	34.6295	31.6249	41.0337	40.0088	26.4173	99.9266	107.46
XLOC_000496	mes-3	19.903	19.6797	24.8194	17.6771	18.2571	23.0278	64.4021	58.962
XLOC_000497	dom-3	17.3839	13.9463	17.266	14.8534	15.3669	15.8536	48.5962	46.0739
XLOC_000498	sst-20	62.2925	57.1528	15.1148	50.6139	56.4312	7.33184	134.56	114.377
XLOC_000499	F54C1.1	5.42137	4.5897	0.547269	1.42425	1.62143	0.594052	10.5583	3.63973
XLOC_000500	C46H11.6	10.5372	8.24295	0.971684	8.68385	9.75572	0.729745	19.7518	19.1693
XLOC_000501	lfe-2	37.8889	36.7127	46.7426	44.809	46.2535	55.3354	121.344	146.398
XLOC_000502	C46H11.3	0.67106	0.34752	0.928564	0	0.323535	0.364254	1.94714	0.687789
XLOC_000504	C46H11.2	24.4883	27.7807	9.63211	8.36722	5.53637	14.4164	61.9011	28.32
XLOC_000507	kin-32	6.43238	6.67951	7.31776	7.2844	5.6678	8.81495	20.4296	21.7672
XLOC_000508	C30F8.3	20.5907	21.9119	14.3191	24.9411	23.9235	11.3304	56.8217	60.195
XLOC_000509	Y110A7A.20	0.477014	1.47015	0	1.53995	0.919337	1.56481	1.94716	4.0241
XLOC_000511	use-1	23.2119	28.0867	28.6418	32.036	28.9509	29.2122	79.9404	90.1991
XLOC_000512	aap-1	17.6543	17.9668	16.0544	17.2338	18.254	15.0007	51.6755	50.4885
XLOC_000513	Y110A7A.9	25.4	23.1299	22.407	24.2972	24.6253	26.5437	70.9369	75.4662
XLOC_000514	Y110A7A.7,Y110A7A.8	80.0794	72.4622	56.8794	68.6993	71.1949	55.6664	209.421	195.561
XLOC_000515	Y110A7A.6	99.0844	91.8955	118.165	94.5423	86.8266	146.138	309.145	327.507
XLOC_000516	mtm-1	23.9144	23.9238	22.8523	23.1145	21.2162	23.9492	70.6905	68.2799
XLOC_000517	Y110A7A.4	14.8872	15.791	51.6219	20.2428	20.2457	59.3347	82.3001	99.8232
XLOC_000518	unc-63	7.12695	6.33891	7.24431	7.29514	6.40095	6.12174	20.7102	19.8178
XLOC_000519	Y110A7A.2	0	0.368924	0	0.128256	0.340213	0.391954	0.368924	0.860423
XLOC_000520	hcp-6	12.2116	11.7769	11.0356	10.8379	11.5425	9.66754	35.0241	32.0479
XLOC_000521	npp-6,slx-1	45.4452	40.1573	37.8233	39.6352	41.8046	37.5029	123.426	118.943
XLOC_000522	bro-1	0	0	3.63584	1.07337	0.951834	4.67656	3.63584	6.70176
XLOC_000523	fncm-1	6.47826	5.37756	6.65754	5.28424	6.62055	5.65014	18.5134	17.5549
XLOC_000524	pde-5	0.32712	0.43591	0.460257	0.457639	0.226099	0.734019	1.22329	1.41776
XLOC_000526	C32E12.1	18.2254	16.786	1.10053	13.1202	13.4573	1.12721	36.1119	27.7047
XLOC_000527	B0261.4	69.1022	71.7305	63.8076	65.9449	62.0058	71.0076	204.64	198.958
XLOC_000528	B0261.1,B0261.9,let-363	47.3794	46.6874	49.6394	46.5976	47.9839	44.9881	143.706	139.57
XLOC_000532	fbxa-145	3.13843	3.12467	4.05548	2.83027	2.99466	2.94986	10.3186	8.77479
XLOC_000533	aman-3	7.05801	7.82253	5.96103	8.40243	9.35142	7.22049	20.8416	24.9743
XLOC_000536	F55A12.6	0.535657	0.189649	0.375101	1.07832	0.608616	0.403872	1.10041	2.09081
XLOC_000537	F55A12.11	3.44711	0	0	0	0	0	3.44711	0
XLOC_000539	F55A12.5	23.8591	20.7567	16.3697	20.8767	21.0782	15.7909	60.9855	57.7458
XLOC_000540	dhs-2	26.2872	29.5155	31.0799	34.0713	29.9369	37.3926	86.8826	101.401
XLOC_000541	F55A12.2,ppk-1	47.8696	47.5594	54.2278	44.0475	49.5486	63.6561	149.657	157.252
XLOC_000542	F55A12.1	44.267	43.5385	24.1904	39.8853	40.1023	16.9374	111.996	96.925
XLOC_000544	C24A11.1	32.3209	31.8164	5.3459	27.5873	30.3698	2.56571	69.4832	60.5228
XLOC_000547	F27C1.4	0.529725	0.56387	0.716597	0.85692	0.765367	1.12675	1.81019	2.74904
XLOC_000548	F27C1.3	16.0319	19.3352	1.8748	14.2008	14.9408	0.501351	37.2419	29.643
XLOC_000550	F27C1.2	100.401	94.5891	191.794	90.5307	88.822	224.028	386.784	403.381
XLOC_000552	F27C1.1	147.249	131.891	6.1641	88.7553	94.2504	1.1534	285.304	184.159
XLOC_000555	C09D4.3	50.8809	47.3402	9.53934	41.8907	48.1002	5.47332	107.76	95.4642
XLOC_000556	C09D4.2	20.9917	17.2325	24.5421	24.4555	23.632	29.5291	62.7663	77.6166
XLOC_000557	C09D4.1	29.1102	30.3839	25.992	29.7714	30.1942	33.5674	85.4861	93.533
XLOC_000558	F59A3.12,F59A3.2	41.5252	36.2558	24.9849	33.9199	37.896	17.4795	102.766	89.2954
XLOC_000559	F59A3.13	7.65085	6.53856	1.49599	5.50001	5.83625	0.595492	15.6854	11.9318
XLOC_000560	F59A3.1	7.13686	6.77034	31.864	10.0277	10.9745	45.2935	45.7712	66.2957
XLOC_000562	tom-1	15.4182	16.3015	22.1926	21.8529	17.8564	22.7933	53.9123	62.5026
XLOC_000563	M01A10.1	15.4044	14.0248	11.4564	13.8535	15.2866	6.64985	40.8856	35.7899
XLOC_000564	M01E11.3	9.40161	8.58071	6.16915	7.95173	8.40635	4.72492	24.1515	21.083
XLOC_000565	M01E11.2	37.3263	37.6476	35.5258	37.6895	40.7161	35.3586	110.5	113.764
XLOC_000566	M01E11.1	18.6677	17.0994	19.2728	19.7551	17.0302	19.2795	55.0399	56.0648
XLOC_000567	cey-2	537.083	523.355	100.037	377.379	367.491	61.3574	1160.48	806.227
XLOC_000568	F46F11.7	16.8401	16.9986	73.201	26.2565	30.1574	91.4978	107.04	147.912
XLOC_000569	F46F11.1	32.5748	31.7625	24.7449	25.2756	25.4491	23.7436	89.0822	74.4683
XLOC_000570	M01A12.4	1.86053	0.767457	1.54648	2.01446	2.50417	1.22444	4.17447	5.74307
XLOC_000571	M01A12.3,col-53	2.83132	2.33287	4.79714	2.19023	2.28115	1.72666	9.96133	6.19804
XLOC_000572	ptr-10	0.766957	0.799087	19.5298	2.03209	1.67777	32.7207	21.0958	36.4306
XLOC_000573	T19B4.5	30.5493	28.545	20.4447	26.652	27.6641	19.6134	79.539	73.9295
XLOC_000574	dnj-21	60.9766	54.2198	77.5706	61.6775	63.999	93.754	192.767	219.43
XLOC_000575	T19B4.3	231.141	236.679	270.522	215.008	202.069	422.873	738.342	839.95
XLOC_000576	npp-7	50.366	51.7271	33.7567	42.1579	43.497	32.2175	135.85	117.872
XLOC_000577	T19B4.1	10.9529	11.1425	27.4019	14.5431	14.5568	33.9151	49.4973	63.015
XLOC_000579	lim-7	5.0791	7.79114	9.61999	6.93558	5.82966	5.32279	22.4902	18.088
XLOC_000581	nhr-266	1.39611	1.5409	0.100823	1.46072	1.44647	0.0446232	3.03783	2.95181
XLOC_000583	F56H1.6	38.0662	40.9963	65.9002	46.4753	38.7604	69.5055	144.963	154.741
XLOC_000584	che-14	7.48686	6.84052	19.2969	14.5	15.74	22.5315	33.6243	52.7715
XLOC_000585	T22E7.2	1.84013	2.02289	1.5764	2.29202	2.14267	0.979438	5.43942	5.41413
XLOC_000586	T22E7.1	20.2398	18.8475	31.8425	16.3923	17.143	34.436	70.9298	67.9713
XLOC_000587	hil-5	217.114	226.75	151.536	197.985	203.446	101.604	595.4	503.035
XLOC_000588	rnt-1	0.398844	0.902855	1.20165	0.942696	0.703895	1.32483	2.50335	2.97142
XLOC_000589	srz-4	0.138065	0	0	0	0	0	0.138065	0
XLOC_000590	lin-35	17.1111	16.6889	18.17	18.2941	17.2834	20.8851	51.97	56.4626
XLOC_000591	obr-4	44.5066	41.601	32.8927	39.3072	40.7158	36.1274	119	116.15
XLOC_000592	ceh-12	0.644866	0.339796	0	0	0.623198	0.351408	0.984662	0.974606
XLOC_000593	col-54	9.39921	10.0611	4.29195	8.53398	9.16865	1.11657	23.7523	18.8192
XLOC_000595	F33D11.2	7.61593	7.4114	1.03777	5.67818	5.72928	0.428426	16.0651	11.8359
XLOC_000596	F33D11.1	8.56515	6.02351	1.31108	6.55695	8.89753	1.40932	15.8997	16.8638
XLOC_000600	C34G6.5	17.6107	13.3287	9.09518	14.1361	15.6883	7.77834	40.0346	37.6027
XLOC_000603	pgp-2	37.112	39.081	32.2408	43.336	42.4845	48.3594	108.434	134.18
XLOC_000604	C34G6.3	42.7961	37.6027	9.43182	39.602	34.4914	8.26287	89.8306	82.3563
XLOC_000605	tyr-4	24.0998	17.8939	49.4618	15.3417	16.9758	75.4367	91.4555	107.754
XLOC_000606	C34G6.1	26.1926	26.1187	19.4269	27.5882	26.8662	22.0367	71.7382	76.4911
XLOC_000607	B0207.5	0.111493	0.13757	0.0946237	0.0483202	0.0863037	0.0673772	0.343687	0.202001
XLOC_000608	air-2	25.6776	22.4328	11.5371	21.9099	21.2323	15.0198	59.6475	58.162
XLOC_000609	gpa-14	0.421419	0.21697	1.18591	0.618568	0.304608	0.534464	1.8243	1.45764
XLOC_000610	B0207.2	2.73676	1.50868	2.67642	1.44028	1.75505	1.17784	6.92186	4.37317
XLOC_000611	B0207.1	8.49528	8.85851	1.28964	8.56247	8.60216	0.477761	18.6434	17.6424
XLOC_000614	Y76G2A.1,Y76G2A.2	1.53219	1.1647	2.06635	1.11008	0.981706	0.704683	4.76324	2.79647
XLOC_000615	C06A5.3	17.8106	16.4279	12.8281	15.55	15.168	11.5074	47.0666	42.2254
XLOC_000616	sir-2.4	8.03879	8.25591	9.60676	7.33167	7.53397	8.39301	25.9015	23.2586
XLOC_000617	C06A5.2	16.7202	16.4285	4.21077	15.121	13.0871	3.19332	37.3595	31.4014
XLOC_000618	C06A5.1	13.3205	10.9643	11.0749	11.9689	11.9089	10.8478	35.3597	34.7256
XLOC_000619	csn-2	62.5276	63.4379	54.7524	59.5625	64.8179	61.8281	180.718	186.208
XLOC_000620	B0025.4	34.8077	30.071	35.3694	28.2706	34.6531	30.3395	100.248	93.2632
XLOC_000621	vps-34	20.1268	18.9293	30.5122	24.3789	24.0145	32.7059	69.5683	81.0993
XLOC_000622	C27A12.4	1.60071	1.53577	1.14541	1.65125	1.8728	1.6326	4.28189	5.15665
XLOC_000623	tag-146	16.0692	13.6397	11.5053	14.4996	16.7629	9.4564	41.2142	40.7189
XLOC_000624	C27A12.2	23.2972	20.1276	16.747	20.6107	22.6841	13.4961	60.1718	56.7909
XLOC_000627	mbd-2	20.8408	18.3188	24.0749	22.275	21.6028	22.2599	63.2345	66.1377
XLOC_000628	haf-9	120.882	132.087	138.168	140.108	134.849	214.583	391.137	489.54
XLOC_000629	ZK484.1	893.187	909.381	955.672	932.607	864.372	1092.37	2758.24	2889.35
XLOC_000630	T27A3.4	311.814	298.112	34.0308	246.393	245.57	14.9246	643.957	506.888
XLOC_000631	ssp-16	172.643	141.599	36.6252	151.428	134.616	15.027	350.867	301.071
XLOC_000633	T27A3.2	51.0004	55.5469	46.7844	58.1754	57.0003	50.7819	153.332	165.958
XLOC_000634	T27A3.1	73.4083	71.8833	65.4238	73.7328	63.5393	84.307	210.715	221.579
XLOC_000635	F56F4.4,pept-3	30.1814	31.0568	7.69922	26.697	31.5792	6.2137	68.9374	64.4899
XLOC_000638	F56F4.3	6.38639	5.95797	0.90128	5.57345	6.25153	0.715828	13.2456	12.5408
XLOC_000639	ttr-55,ttr-56	3.47752	3.66881	0.801642	3.09947	4.25508	0.329937	7.94797	7.68449
XLOC_000640	ttr-58	0.362879	0.569539	0.25317	0.596257	1.04827	0	1.18559	1.64453
XLOC_000641	F56F4.8	0	0	0	0.117166	0.103537	0	0	0.220703
XLOC_000642	T09B4.5	5.04373	3.91929	9.82144	6.83549	9.76703	9.63901	18.7845	26.2415
XLOC_000645	T09B4.4	19.8352	16.5818	42.8794	20.902	19.5949	52.6625	79.2964	93.1594
XLOC_000650	T09B4.3	8.32569	8.71082	1.21484	9.40578	8.76404	1.44175	18.2513	19.6116
XLOC_000651	T05E7.3,T09B4.1,T09B4.2	41.1035	49.1703	36.649	44.3428	45.4252	44.1798	126.923	133.948
XLOC_000652	col-55	0	0	0	0.214724	0	0	0	0.214724
XLOC_000653	T05E7.1	9.14539	9.41909	22.982	24.5876	23.5749	31.9991	41.5465	80.1616
XLOC_000654	T08B2.14	0	3.82579	0	0	0	0	3.82579	0
XLOC_000655	T08B2.5	36.8354	38.1931	34.5803	38.8375	39.6577	35.1768	109.609	113.672
XLOC_000656	T08B2.4	3.95691	4.21017	5.08918	4.33796	4.10096	5.92013	13.2563	14.359
XLOC_000658	col-56	0.225167	0.480173	0.467476	0.492498	1.08947	0.250343	1.17282	1.83231
XLOC_000659	C48E7.7	210.801	204.99	21.5989	151.511	148.841	9.94009	437.39	310.292
XLOC_000660	C48E7.6	4.87618	4.94361	3.72739	4.88434	4.77549	3.64199	13.5472	13.3018
XLOC_000661	cof-2	2.2416	3.25392	4.69668	2.62359	3.35351	5.63955	10.1922	11.6166
XLOC_000662	C48E7.11	39.5749	32.1947	43.0162	39.1091	35.8553	53.0323	114.786	127.997
XLOC_000663	lpd-2	50.0351	53.9006	31.3908	51.0611	52.7141	29.1071	135.327	132.882
XLOC_000664	C48E7.2	44.0985	40.1535	28.7118	38.1038	37.7552	26.6825	112.964	102.542
XLOC_000665	C48E7.1	48.3815	37.3058	204.327	38.8795	40.1185	308.415	290.014	387.413
XLOC_000668	C10G11.7	103.908	100.309	100.568	104.761	101.804	97.879	304.785	304.444
XLOC_000669	C10G11.6,pnk-1	80.7816	69.4193	61.2502	73.0501	74.229	71.2526	211.451	218.532
XLOC_000671	srh-51	0	0.141342	0	0	0	0	0.141342	0
XLOC_000673	C10G11.1	8.18991	7.07345	1.50078	5.97438	5.6178	0.169845	16.7641	11.762
XLOC_000674	F26B1.5	6.78519	4.90397	0.431017	6.7988	7.88569	0.226327	12.1202	14.9108
XLOC_000675	col-58	82.5817	95.3444	21.277	89.7399	81.5652	12.0344	199.203	183.34
XLOC_000677	ima-2	109.457	107.584	91.1254	90.358	87.6167	93.1399	308.166	271.115
XLOC_000678	F26B1.2	151.228	150.619	86.3993	134.212	143.122	78.2152	388.246	355.549
XLOC_000679	F26B1.1	6.92958	5.31978	1.18093	3.36751	4.60281	0.236462	13.4303	8.20678
XLOC_000680	F26B1.8	146.587	128.784	8.96023	99.6183	94.2262	3.85061	284.331	197.695
XLOC_000681	bli-4	128.763	136.931	123.722	86.5465	91.6341	147.748	389.416	325.929
XLOC_000682	K04F10.3	28.3321	27.8987	24.4519	27.4227	29.6149	18.9213	80.6827	75.9589
XLOC_000683	K04F10.2	0.731175	0.994377	1.6245	1.01264	1.11748	0.948806	3.35005	3.07893
XLOC_000684	K04F10.1	6.36	5.5759	10.6886	6.96105	9.16822	12.5922	22.6245	28.7215
XLOC_000685	K04F10.7	25.5032	24.2907	26.4004	22.684	25.8861	26.2024	76.1943	74.7725
XLOC_000686	ZC308.4	5.61933	4.11392	1.2981	2.03846	2.45801	0.571547	11.0313	5.06802
XLOC_000687	gld-2	49.028	53.2459	29.9419	42.6091	44.6066	26.5728	132.216	113.788
XLOC_000689	cuti-1	36.1194	38.6349	320.992	85.7041	91.89	398.479	395.746	576.073
XLOC_000690	san-1	17.0389	15.0905	14.4808	16.1341	17.9989	14.3301	46.6102	48.4631
XLOC_000692	ncbp-1	45.2937	45.2481	33.5665	44.3417	49.2932	34.8664	124.108	128.501
XLOC_000693	snt-4	22.4868	27.1005	34.3282	26.8575	26.1887	31.4887	83.9155	84.5349
XLOC_000694	npp-12	45.3079	44.0475	32.4525	42.2894	43.0651	34.1794	121.808	119.534
XLOC_000696	knl-2	20.1453	21.5267	17.6846	18.6831	19.6327	18.2066	59.3566	56.5224
XLOC_000697	K06A5.3	29.8694	24.9591	10.2514	25.6368	29.9166	5.42928	65.0799	60.9827
XLOC_000698	K06A5.2	139.889	122.813	12.333	97.0587	103.593	5.76766	275.035	206.419
XLOC_000699	K06A5.1	25.7086	22.3416	21.7876	20.8291	24.716	14.1901	69.8378	59.7352
XLOC_000700	sulp-1	0.596749	0.743208	1.06708	0.324141	0.911072	0.838736	2.40704	2.07395
XLOC_000701	uri-1	27.5032	27.3336	22.6546	22.278	27.2269	22.3972	77.4914	71.9021
XLOC_000702	acdh-1	3272.7	3351.55	5089.81	3613.78	3252.09	6409.49	11714.1	13275.4
XLOC_000703	C55B7.3	48.9253	49.8443	23.7117	49.3788	45.9349	29.9875	122.481	125.301
XLOC_000704	gly-2	10.904	9.88033	7.67788	9.10356	9.60496	6.80482	28.4622	25.5133
XLOC_000705	glh-2	35.4536	32.8296	13.0402	26.057	26.6392	10.0488	81.3234	62.745
XLOC_000707	T10E9.4	103.072	101.481	25.0141	84.7765	88.313	14.7566	229.567	187.846
XLOC_000708	T10E9.3	147.652	174.105	12.7089	85.118	73.2694	5.96671	334.466	164.354
XLOC_000710	T10E9.1,T10E9.2	32.4173	35.6341	27.0749	30.8101	34.0365	23.63	95.1263	88.4766
XLOC_000712	tre-1	52.2554	50.9777	57.5705	56.3897	63.1409	57.7989	160.804	177.329
XLOC_000713	xpg-1	16.0292	13.2054	15.0062	12.5607	15.5846	12.516	44.2408	40.6613
XLOC_000715	F57B10.5	219.968	212.565	219.045	247.141	253.959	216.002	651.578	717.102
XLOC_000716	F57B10.4	23.598	23.7662	18.2179	23.1494	24.6685	13.4273	65.5821	61.2452
XLOC_000717	F57B10.3	156.913	166.344	334.354	165.485	147.485	369.227	657.611	682.197
XLOC_000718	let-607,try-6	68.1265	70.7308	69.9758	66.0572	64.3133	69.8473	208.833	200.218
XLOC_000721	D2092.6,F48A9.1,F48A9.2	16.8874	17.315	12.1231	18.1311	19.6	9.71982	46.3255	47.4509
XLOC_000724	tsp-19	9.00693	9.48139	3.84989	9.9496	10.8158	2.59952	22.3382	23.3649
XLOC_000725	D2092.8	156.901	172.785	27.8056	146.524	116.935	12.9629	357.492	276.422
XLOC_000727	ZC581.3	13.0416	12.2463	5.57222	6.9499	6.35647	4.79536	30.8601	18.1017
XLOC_000728	ZC581.2	15.1622	17.3386	2.32763	10.7617	11.4762	0.490442	34.8284	22.7283
XLOC_000730	nekl-2	11.6951	13.6701	16.7673	16.0928	16.2745	14.6066	42.1325	46.9739
XLOC_000732	C17F3.1	206.273	188.705	8.04321	102.523	126.225	4.18887	403.021	232.937
XLOC_000733	C17F3.3	23.7817	22.2575	2.21434	17.1202	19.1493	0.745789	48.2535	37.0153
XLOC_000734	rmd-5	0	0	0.209684	0	0.145914	0	0.209684	0.145914
XLOC_000735	T23B3.2	77.2751	84.501	40.4349	65.9871	65.2075	34.588	202.211	165.783
XLOC_000736	T23B3.1	38.9738	39.958	36.4434	38.5356	38.0097	38.2229	115.375	114.768
XLOC_000737	mec-6	1.8036	2.37724	3.57665	2.2369	2.30143	2.77046	7.75749	7.30879
XLOC_000738	W02D3.1,dhod-1	333.763	324.645	363.271	366.373	334.73	421.523	1021.68	1122.63
XLOC_000739	W02D3.12	102.76	81.1521	103.372	88.4382	90.7089	111.157	287.284	290.304
XLOC_000741	gpc-2	140.995	132.198	150.541	155.182	145.991	161.234	423.734	462.407
XLOC_000742	F08B6.1	23.4237	27.9023	27.9446	31.4778	22.9368	34.9806	79.2706	89.3952
XLOC_000743	cye-1	46.0812	49.3787	28.1804	44.4837	42.7879	21.8365	123.64	109.108
XLOC_000745	acdh-5	22.6209	19.1934	1.49151	14.9908	17.7476	0.550773	43.3058	33.2892
XLOC_000746	pqn-20	18.861	19.6579	14.7046	16.9832	18.1666	17.3469	53.2235	52.4967
XLOC_000747	E02D9.1	119.335	120.882	84.2277	114.753	125.238	92.1594	324.445	332.15
XLOC_000749	ulp-5	12.4564	11.7596	8.49801	10.3962	11.9712	6.98617	32.714	29.3536
XLOC_000750	teg-4	40.957	40.4257	39.1236	38.152	38.8375	33.6489	120.506	110.638
XLOC_000752	ahcy-1	2796.13	3084.64	2268.39	2571.53	2335.02	3394.66	8149.16	8301.21
XLOC_000753	dpf-3	64.5534	63.9516	74.0964	60.4936	58.8949	76.6132	202.601	196.002
XLOC_000754	dpy-14	0.541877	0.234339	0.144482	0.942864	0.21032	0.352828	0.920698	1.50601
XLOC_000756	syp-4	46.8153	43.5771	31.4593	40.4395	41.9075	21.6763	121.852	104.023
XLOC_000757	rpb-5	134.022	140.366	88.6349	134.622	126.804	86.022	363.023	347.448
XLOC_000758	H27M09.1	32.6223	32.0897	29.9955	31.3801	32.3472	28.1626	94.7075	91.8899
XLOC_000759	glh-1	356.978	350.877	218.629	326.39	328.589	161.959	926.484	816.938
XLOC_000760	T21G5.2,T21G5.6	19.2606	17.8203	17.3427	14.6188	14.8442	24.6386	54.4236	54.1016
XLOC_000762	T21G5.1	12.7835	11.0057	1.66176	10.0044	10.9772	0.48751	25.451	21.4691
XLOC_000766	C48B6.4	11.7039	11.1744	1.58577	8.42965	10.5588	0.456081	24.4641	19.4445
XLOC_000768	C48B6.3	51.1106	47.1575	28.1458	37.7444	41.6901	24.1494	126.414	103.584
XLOC_000769	C48B6.2	75.0262	73.3773	36.0217	67.5013	70.4563	40.2483	184.425	178.206
XLOC_000770	ztf-4	44.3552	45.0383	29.0626	39.9358	38.4089	31.3313	118.456	109.676
XLOC_000771	T10B11.2	42.3335	39.2834	46.5073	44.3542	45.7008	50.8208	128.124	140.876
XLOC_000773	pcbd-1	42.632	37.7515	94.187	44.9811	42.9224	117.546	174.57	205.45
XLOC_000774	C30F12.7	41.3415	38.4845	73.3455	42.9697	46.4372	74.0975	153.171	163.504
XLOC_000776	nmur-4	8.77522	8.44031	7.3507	9.48817	11.6693	3.83887	24.5662	24.9963
XLOC_000778	ctg-1	12.1274	11.6911	49.7384	16.0404	17.2396	64.7673	73.5569	98.0473
XLOC_000780	F15C11.2	101.087	106.399	92.8681	96.9305	93.8768	105.476	300.354	296.283
XLOC_000782	sem-4	10.52	11.7955	14.7741	10.2762	9.62751	14.659	37.0896	34.5627
XLOC_000783	mdt-28	110.115	111.066	96.1489	107.558	101.984	119.33	317.33	328.872
XLOC_000784	cutl-6	0.435651	0.455522	9.36914	1.32931	0.928062	6.24377	10.2603	8.50114
XLOC_000785	W01A8.5	31.0013	32.8286	24.6797	30.9365	28.248	21.1532	88.5096	80.3377
XLOC_000786	nduf-6	239.846	234.023	319.558	237.674	229.016	357.051	793.427	823.741
XLOC_000787	ekl-1	35.445	35.8872	34.4487	36.7962	32.6734	32.3246	105.781	101.794
XLOC_000788	F22D6.9	24.0218	24.1452	12.9672	23.9399	28.4496	9.36106	61.1342	61.7506
XLOC_000790	col-60	788.154	936.874	66.8554	583.513	535.633	9.9797	1791.88	1129.13
XLOC_000791	gly-18	0.517445	0.710241	0.72854	0.469073	0.660958	0.866709	1.95623	1.99674
XLOC_000792	gly-19	8.39023	8.26045	11.2911	11.7817	10.4489	13.2132	27.9418	35.4438
XLOC_000793	glr-3	0.0455622	0.0943496	0.254559	0.149083	0.13202	0.2048	0.394471	0.485903
XLOC_000794	taf-11.2	8.77493	6.6682	3.46415	6.15142	6.59236	2.45091	18.9073	15.1947
XLOC_000795	xpa-1	25.0484	22.1348	17.0062	20.6317	19.8655	16.2183	64.1894	56.7155
XLOC_000796	K07G5.3	0.231337	0.343047	0.39751	0.223364	0.445198	0.346548	0.971894	1.01511
XLOC_000797	K07G5.5	16.0518	14.8225	22.5593	16.934	14.6544	27.5145	53.4336	59.1029
XLOC_000799	M05B5.3,trpa-2	17.9978	14.7832	10.5313	16.3878	21.6734	8.0085	43.3123	46.0697
XLOC_000800	M05B5.4	18.1042	18.1463	24.8271	19.3909	21.2172	17.0894	61.0776	57.6975
XLOC_000802	C01H6.4	15.0327	14.7717	20.0374	14.2125	12.8087	28.5716	49.8418	55.5928
XLOC_000803	nhr-23	27.9863	29.151	31.8747	28.6827	29.0849	37.5955	89.012	95.3631
XLOC_000804	C01H6.6	12.0853	11.0011	14.1479	14.9326	14.3074	13.0464	37.2343	42.2864
XLOC_000805	tag-298	24.8064	25.5646	25.2449	22.8236	24.4833	23.3819	75.6159	70.6888
XLOC_000806	C01H6.8	15.0213	15.4177	52.7976	32.3047	32.1703	54.6324	83.2366	119.107
XLOC_000807	R06C7.1	136.055	135.796	77.7839	118.939	121.496	52.4219	349.635	292.857
XLOC_000809	cpg-3	58.8734	49.2786	5.03967	26.386	27.3114	4.56689	113.192	58.2643
XLOC_000810	bub-1	48.272	44.3738	38.0628	40.8178	41.8595	32.0468	130.709	114.724
XLOC_000811	ztf-15	12.9245	10.9226	9.26528	10.3992	10.9877	5.96971	33.1124	27.3566
XLOC_000814	ztf-2	1.60249	1.72048	24.3422	4.91996	3.68351	34.5495	27.6652	43.153
XLOC_000815	F13G3.12,srd-53	7.36279	6.75327	5.93742	6.50941	7.30888	9.35651	20.0535	23.1748
XLOC_000816	F13G3.7	24.6274	23.9684	24.863	26.2373	24.8229	26.6253	73.4588	77.6855
XLOC_000817	F13G3.11	56.2664	54.3474	56.897	64.1046	57.6138	71.3344	167.511	193.053
XLOC_000818	F52A8.1	254.691	247.093	442.5	302.347	297.719	494.298	944.284	1094.36
XLOC_000819	glb-18	4.91916	6.23068	4.42881	6.35277	6.4021	4.92135	15.5787	17.6762
XLOC_000820	F52A8.6	25.8128	23.7389	18.7108	21.5272	19.7149	19.672	68.2625	60.9141
XLOC_000821	F07A5.2	111.253	101.069	10.5841	78.1476	79.2463	4.00068	222.906	161.395
XLOC_000822	scav-6	23.1733	26.3438	16.3417	19.2118	14.7306	16.4957	65.8588	50.4381
XLOC_000823	C15A11.2	29.7548	28.2814	6.23095	28.0588	28.5294	2.85465	64.2672	59.4428
XLOC_000825	col-7	170.061	87.0234	0.916778	2.10427	0.600841	0.346534	258.001	3.05165
XLOC_000826	C15A11.7	3.54168	2.47566	13.79	1.03342	1.67753	21.1655	19.8073	23.8765
XLOC_000827	unc-13	9.80961	9.73649	13.7193	12.1312	11.9049	16.9817	33.2654	41.0178
XLOC_000828	spe-4	45.8961	39.7439	17.9075	45.5663	43.0091	12.2027	103.547	100.778
XLOC_000830	asic-2	0.220466	0.306723	0.406477	0.319694	0.495932	0.567493	0.933666	1.38312
XLOC_000831	T28F4.5	213.214	235.067	178.523	197.829	146.919	178.384	626.804	523.132
XLOC_000832	pbrm-1	26.0108	27.1636	28.0402	25.838	28.6713	30.4978	81.2146	85.0071
XLOC_000833	C26C6.6	24.2103	18.7644	2.39649	11.6494	17.3793	0.474994	45.3712	29.5037
XLOC_000834	glb-8	2.63008	1.05464	1.65998	1.66527	0.979663	1.22694	5.3447	3.87187
XLOC_000835	goa-1	88.562	85.9288	92.9539	90.0435	91.4534	95.6198	267.445	277.117
XLOC_000836	nas-36	37.7812	38.0254	13.2154	21.2125	20.8757	13.7965	89.022	55.8847
XLOC_000837	C26C6.4	0.78217	0.480966	0.316036	0.656077	0.746035	0	1.57917	1.40211
XLOC_000838	T25G3.1	27.6267	24.9542	24.342	24.2178	27.8294	24.1009	76.9229	76.1481
XLOC_000839	T25G3.3,chs-1	111.5	100.104	61.624	91.1858	96.0981	51.23	273.228	238.514
XLOC_000840	T25G3.4	77.6159	73.2281	82.4209	75.8664	70.8091	87.0262	233.265	233.702
XLOC_000841	D2030.2	24.5718	22.5147	36.2834	21.9987	20.8238	36.8542	83.3699	79.6767
XLOC_000842	mce-1	59.0803	56.0513	130.7	70.8946	74.9974	136.756	245.832	282.648
XLOC_000843	D2030.12	2.34827	3.53478	2.73683	2.57603	3.72003	3.35095	8.61988	9.64701
XLOC_000844	D2030.11,D2030.7,D2030.8	50.6922	53.5337	36.0755	51.3766	43.089	40.9725	140.301	135.438
XLOC_000845	wdr-23	24.1158	25.2363	36.4794	24.0787	26.1366	37.0199	85.8315	87.2352
XLOC_000846	aex-1	5.44579	4.37369	5.40989	2.92341	3.2142	7.85869	15.2294	13.9963
XLOC_000847	lrp-1	19.3917	21.6386	56.8687	39.4268	45.1766	58.1404	97.899	142.744
XLOC_000848	F26A3.5	41.2018	38.8386	8.6142	29.6383	29.9407	3.92589	88.6546	63.5049
XLOC_000850	T24B1.1	53.1027	50.0944	47.7499	56.8678	56.358	50.3926	150.947	163.618
XLOC_000851	T23G11.7	56.964	52.3786	55.3193	55.1648	50.9363	57.8832	164.662	163.984
XLOC_000852	rlbp-1	16.294	16.707	18.7909	15.557	15.4792	17.7262	51.7919	48.7624
XLOC_000853	T23G11.4	28.6385	27.0017	35.2266	28.6489	28.0749	37.366	90.8668	94.0898
XLOC_000854	gld-1	256.239	257.164	81.6669	197.955	195.329	55.5175	595.07	448.801
XLOC_000855	T23G11.10	0.212262	0.654064	0.302928	1.38819	1.2363	0	1.16925	2.62449
XLOC_000856	gna-2	19.32	15.9439	8.27937	13.6076	14.6396	6.89477	43.5433	35.142
XLOC_000857	T23G11.11	76.6282	68.4549	104.15	95.3514	87.0087	156.418	249.233	338.778
XLOC_000858	F27D4.1	312.279	322.479	479.007	327.223	304.65	601.142	1113.77	1233.02
XLOC_000859	F27D4.3	10.9164	9.41242	6.44899	9.19038	9.61332	5.39886	26.7778	24.2026
XLOC_000860	F27D4.4	141.598	135.967	102.949	137.313	146.056	123.905	380.514	407.274
XLOC_000861	tag-173	169.891	175.634	163.753	157.407	149.999	209.293	509.278	516.699
XLOC_000862	F27D4.8	21.979	23.0874	18.0385	19.6118	22.8273	27.7315	63.1049	70.1706
XLOC_000863	F27D4.6	9.10072	8.05932	8.93776	8.95782	9.18385	9.96607	26.0978	28.1077
XLOC_000865	F58H10.1	24.6666	22.0505	40.1113	64.483	63.5144	13.032	86.8284	141.029
XLOC_000866	adr-1	39.854	40.1995	32.2426	37.427	36.55	31.0796	112.296	105.057
XLOC_000869	D2005.4,D2005.7,drh-3	69.15	57.2689	45.5837	57.8749	60.3636	33.0294	172.003	151.268
XLOC_000870	F30F8.3	29.9228	29.1441	16.7584	25.0082	25.8295	17.1464	75.8253	67.9841
XLOC_000871	F30F8.9	48.472	48.2319	55.6975	47.3169	52.52	60.7589	152.401	160.596
XLOC_000872	F30F8.10	34.5285	29.8075	25.8275	29.187	32.0016	26.0636	90.1635	87.2522
XLOC_000874	taf-5	23.8844	24.3964	22.2625	24.6269	24.8311	20.3274	70.5433	69.7854
XLOC_000875	apb-3	25.9742	28.3225	31.2255	28.2243	26.989	32.4323	85.5222	87.6456
XLOC_000876	R11A5.4	422.613	434.947	911.729	406.469	381.714	1107.98	1769.29	1896.16
XLOC_000877	F55D12.1	1.79196	2.65049	4.32631	1.78119	1.57266	6.81039	8.76876	10.1642
XLOC_000878	F55D12.2	41.2009	41.6906	18.1074	23.2083	23.2674	19.8956	100.999	66.3713
XLOC_000880	F55D12.6	40.5508	35.643	3.50625	29.3846	29.6178	3.02149	79.7001	62.0239
XLOC_000881	T22C1.1	43.0772	42.1115	31.3009	41.5741	38.5681	33.3133	116.49	113.456
XLOC_000882	T22C1.3,T22C1.5	41.8253	36.5346	37.9239	37.754	39.6392	36.8559	116.284	114.249
XLOC_000883	T22C1.6	46.6276	52.6037	46.2898	47.9408	52.4519	41.7323	145.521	142.125
XLOC_000884	T22C1.15	0	0.323927	0	0	0	0.3343	0.323927	0.3343
XLOC_000886	T22C1.9	34.5228	32.2908	4.36136	26.9078	28.2528	4.05474	71.175	59.2153
XLOC_000888	rbg-2	16.6806	15.0705	16.0965	17.3463	15.469	16.6703	47.8476	49.4856
XLOC_000889	H05L14.2	5.98112	5.17994	2.44076	3.83041	4.71328	1.70081	13.6018	10.2445
XLOC_000891	C54G4.5	7.34295	7.25086	2.28582	0.901503	6.00258	2.27228	16.8796	9.17636
XLOC_000892	C54G4.2	10.5972	9.54302	1.77691	8.67223	9.09996	0.985337	21.9171	18.7575
XLOC_000893	C54G4.7,rskn-2	51.0179	47.7464	46.3952	49.7485	48.56	59.1641	145.159	157.473
XLOC_000894	K04G2.2	40.9749	39.5575	27.07	33.5842	36.8671	26.6957	107.602	97.147
XLOC_000895	K04G2.4	28.9629	25.7581	1.75394	18.9785	19.4976	1.14576	56.4749	39.6219
XLOC_000896	K04G2.6	21.3997	20.8804	23.7606	22.4184	19.251	24.7861	66.0407	66.4555
XLOC_000897	K04G2.12	5.20867	8.55025	4.28942	7.94593	7.98517	1.14151	18.0483	17.0726
XLOC_000899	2015-04-01	11.6087	9.77437	13.8818	11.4605	10.2625	15.3303	35.2649	37.0533
XLOC_000900	K04G2.10	0	0	0	0.108711	0	0	0	0.108711
XLOC_000902	rme-8	24.2971	25.3113	27.6048	26.7231	27.29	31.6648	77.2132	85.6779
XLOC_000903	F18C12.3	37.5941	32.8777	23.8598	32.3358	33.6205	22.1064	94.3316	88.0627
XLOC_000904	spr-4	9.85107	10.7815	15.2408	9.8308	11.7243	16.5054	35.8734	38.0605
XLOC_000905	mau-2	22.6843	22.0863	12.6575	17.797	19.1236	12.9682	57.4281	49.8888
XLOC_000906	T28B8.1	17.4699	17.7358	13.3411	7.60722	7.57753	7.32668	48.5468	22.5114
XLOC_000907	ins-18	5.85941	7.05247	8.04541	8.36643	5.6369	7.24336	20.9573	21.2467
XLOC_000908	T28B8.6	23.6501	25.9056	4.29343	15.8485	20.8692	1.15371	53.8491	37.8714
XLOC_000909	T28B8.3	0.548405	0.135804	0.405358	0.280834	0.106603	0.420525	1.08957	0.807962
XLOC_000910	T28B8.4	4.51456	3.76818	0.420708	3.20348	3.25489	0.116457	8.70345	6.57483
XLOC_000913	H31B20.1	0.148567	0	0.406163	0	0.14155	0.641252	0.55473	0.782802
XLOC_000914	kcnl-2	2.81361	2.7502	4.82964	3.27715	2.81893	3.54119	10.3935	9.63727
XLOC_000915	T02E1.6	30.5707	27.5995	3.72814	23.4193	26.0594	1.0726	61.8983	50.5513
XLOC_000916	gla-3	33.746	27.5525	11.837	23.3305	23.7976	7.41229	73.1355	54.5404
XLOC_000918	T02E1.8	4.42821	4.61909	14.657	7.30026	6.10597	15.6101	23.7043	29.0163
XLOC_000919	ZK265.3	56.2713	55.6523	3.90494	39.7018	39.6487	1.44538	115.829	80.7959
XLOC_000920	ZK265.6	130.957	134.503	86.2372	118.525	125.38	79.9674	351.697	323.872
XLOC_000921	ZK265.7	10.614	8.92596	21.2775	12.7734	14.9311	15.1244	40.8175	42.8289
XLOC_000922	T01G9.1,cutl-8	5.37327	6.93299	5.63512	6.41569	7.39216	3.28979	17.9414	17.0976
XLOC_000923	T01G9.3	1.29191	0.995912	2.73564	1.09762	1.0806	3.06558	5.02346	5.2438
XLOC_000924	mei-1	21.4194	19.2723	20.253	22.1192	17.7922	18.4117	60.9447	58.3231
XLOC_000927	cep-1	18.7821	21.6517	14.8656	20.7441	20.0348	13.0297	55.2994	53.8086
XLOC_000928	C34B7.1	4.0167	3.23034	1.55621	1.89995	3.14996	0.529853	8.80325	5.57976
XLOC_000929	mys-4	10.443	10.2098	8.68133	9.79635	9.75431	7.74225	29.3341	27.2929
XLOC_000930	C34B7.2	15.4595	14.5177	18.7682	15.5914	16.2593	20.4059	48.7454	52.2566
XLOC_000931	tba-5	2.8471	1.28723	3.42675	3.34451	2.16284	2.30137	7.56108	7.80872
XLOC_000932	F16D3.6	0	0.156613	0	0.165691	0	0	0.156613	0.165691
XLOC_000933	ser-5	1.61893	1.44419	1.81851	1.92359	2.23093	1.10113	4.88163	5.25565
XLOC_000935	ngp-1	99.4634	104.506	66.6451	91.8904	88.5535	58.3081	270.615	238.752
XLOC_000936	T19A6.3,T19A6.4	80.68	79.8662	114.769	96.3086	85.2824	114.039	275.315	295.63
XLOC_000937	F02E9.1	37.4313	40.1396	37.3144	40.9182	39.0053	48.9264	114.885	128.85
XLOC_000938	F02E9.7	15.5564	17.3707	20.8529	15.2418	15.8832	20.6282	53.78	51.7532
XLOC_000939	sin-3	25.4457	24.3091	21.1202	22.0033	23.7227	19.0772	70.875	64.8032
XLOC_000940	F02E9.8	0	0.626168	0.324137	0.384253	0.114251	0.384437	0.950305	0.882941
XLOC_000941	sod-2	146.605	148.398	195.38	161.2	162.907	210.023	490.383	534.13
XLOC_000945	unc-120	24.9314	22.4625	30.9772	25.8834	24.5346	24.2061	78.3711	74.6241
XLOC_000947	D1081.5	30.9144	25.7169	3.81078	24.5835	26.5603	1.36865	60.4421	52.5125
XLOC_000948	D1081.7	72.7367	71.1234	36.5848	59.2491	57.0447	23.6055	180.445	139.899
XLOC_000949	D1081.8	70.2218	68.4534	49.6695	65.3386	65.1336	48.6844	188.345	179.157
XLOC_000950	axl-1	4.63386	6.1589	1.9376	2.90889	2.58884	0.612951	12.7304	6.11068
XLOC_000951	K02B12.6	7.01367	6.01886	5.32125	5.78999	5.50491	4.54324	18.3538	15.8381
XLOC_000952	K02B12.9	3.18858	2.96252	2.78252	4.82495	5.42748	5.71997	8.93362	15.9724
XLOC_000955	ran-4	172.393	172.754	140.792	174.428	171.495	154.527	485.939	500.45
XLOC_000956	R05D11.5	94.8414	97.2362	96.2211	107.007	109.209	114.063	288.299	330.279
XLOC_000957	R05D11.4,R05D11.6,R05D11.9	78.5382	83.5579	65.2538	80.9943	69.9088	75.8182	227.35	226.721
XLOC_000958	R05D11.7	60.8899	62.6132	50.2354	58.255	63.1591	52.8479	173.738	174.262
XLOC_000959	edc-3	34.8961	32.6057	20.3272	29.0959	29.4905	21.753	87.829	80.3394
XLOC_000960	F43G9.13	43.1619	39.8865	52.1493	49.8944	46.8752	56.3282	135.198	153.098
XLOC_000961	F43G9.2	24.4895	26.8359	23.6941	26.9484	30.6008	25.4149	75.0195	82.9641
XLOC_000962	cfim-1	41.2456	44.0482	33.3285	39.3064	37.663	34.8236	118.622	111.793
XLOC_000963	F43G9.8	6.66399	3.87759	1.0618	4.4991	5.11969	0.182584	11.6034	9.80137
XLOC_000968	ces-1	0.152783	0	0	0	0	0	0.152783	0
XLOC_000969	F43G9.12	21.7549	20.1234	17.3893	21.087	22.1146	18.428	59.2676	61.6296
XLOC_000970	syx-17	17.0533	15.0085	20.4226	15.3351	15.5243	19.1258	52.4844	49.9852
XLOC_000971	sig-7	28.0807	27.0282	23.3851	23.0419	24.6395	21.9784	78.494	69.6598
XLOC_000972	flp-22	53.6773	45.1501	68.9406	59.4578	53.4162	62.2461	167.768	175.12
XLOC_000973	mrt-1	14.3933	14.3391	22.7516	11.8972	13.1201	23.4812	51.484	48.4985
XLOC_000974	F39H2.3	42.4591	38.8623	46.0639	42.1504	44.2528	37.2396	127.385	123.643
XLOC_000975	K07A12.1	48.8545	46.7796	53.5264	45.7299	52.6487	49.6254	149.161	148.004
XLOC_000976	asg-1	511.853	518.024	432.089	514.927	498.784	473.751	1461.97	1487.46
XLOC_000977	F39H11.1	39.1537	40.3182	31.0359	48.8859	38.6945	32.2229	110.508	119.803
XLOC_000978	cdk-8	12.9768	13.5521	13.3627	15.4162	13.1806	16.7919	39.8916	45.3887
XLOC_000980	rpb-3	68.7144	69.2406	46.0184	62.6926	62.6957	46.469	183.973	171.857
XLOC_000981	C36B1.14	28.9914	24.5908	23.655	26.5691	26.6781	30.1784	77.2372	83.4256
XLOC_000982	C36B1.6	6.72903	7.90344	8.43394	9.70532	7.15302	13.9454	23.0664	30.8037
XLOC_000983	dhfr-1,gls-1	48.6642	45.7516	42.307	49.512	48.0318	40.1035	136.723	137.647
XLOC_000984	imp-1	25.7185	23.8181	25.6236	24.3031	26.2649	23.7834	75.1602	74.3514
XLOC_000985	lmn-1	144.963	146.672	97.9875	133.797	124.693	89.5652	389.623	348.055
XLOC_000986	trt-1	10.3084	9.37756	9.29836	8.69431	9.10293	8.02265	28.9843	25.8199
XLOC_000987	F36A2.3,F36A2.7	899.646	893.645	1042.39	912.018	857.083	1149.33	2835.68	2918.43
XLOC_000991	sup-17	21.3042	21.0042	23.8086	19.9479	20.8161	26.8386	66.117	67.6026
XLOC_000992	phip-1	41.8895	47.9142	50.1782	49.3331	46.6626	57.4824	139.982	153.478
XLOC_000993	F36A2.9	47.9789	45.3771	36.3093	45.0831	42.5341	40.0167	129.665	127.634
XLOC_000994	F36A2.11	20.8965	15.7473	3.19319	17.2605	16.6264	0.983161	39.837	34.8701
XLOC_000995	F29D10.1	13.8214	13.6311	1.85048	11.654	13.9289	1.83442	29.303	27.4173
XLOC_000996	F29D10.2	12.7979	13.766	0	3.02036	1.54433	0	26.5639	4.56469
XLOC_000999	F55H12.2	16.5218	13.0675	29.2454	13.0162	13.1562	24.8498	58.8347	51.0222
XLOC_001000	F55H12.5	28.1914	25.0601	1.8063	18.0487	22.7555	1.03281	55.0578	41.837
XLOC_001001	snf-2	13.8335	13.4899	1.41541	11.5187	13.2981	1.37967	28.7388	26.1965
XLOC_001002	F55H12.3	7.30443	7.52315	6.52151	8.83544	8.01123	10.2724	21.3491	27.1191
XLOC_001005	T08G11.3	0.784846	0.731062	1.32974	0.712953	0.757711	0.289037	2.84565	1.7597
XLOC_001006	tsp-15	9.52786	10.2931	13.2201	7.56475	6.97098	10.872	33.0411	25.4077
XLOC_001007	F53B6.7	16.2954	14.9432	3.05884	12.9659	13.2574	1.68022	34.2974	27.9035
XLOC_001008	F53B6.5	0	0.248516	0	0.256112	0.45609	0.452551	0.248516	1.16475
XLOC_001012	gei-11	33.1405	29.5077	21.3833	28.9817	25.8256	17.725	84.0315	72.5323
XLOC_001013	mdt-31	27.8266	23.919	26.7024	24.8667	31.1026	35.9443	78.448	91.9136
XLOC_001014	F32H2.10	20.414	19.7644	14.9105	14.9266	19.7335	15.365	55.0889	50.0251
XLOC_001015	thoc-3	27.0954	25.7825	28.8615	27.1741	25.7976	24.4689	81.7394	77.4406
XLOC_001017	F32H2.8	0.626319	0.681064	1.50778	1.75283	1.77481	1.19581	2.81516	4.72345
XLOC_001018	tba-6	0.457679	0.616522	0.454378	0.853869	0.695094	0.145842	1.52858	1.69481
XLOC_001021	F36F2.2	10.1908	7.85695	11.6848	10.7613	7.69935	13.9925	29.7325	32.4532
XLOC_001022	F36F2.1	26.6966	22.4835	42.765	29.4826	33.0206	36.5375	91.9451	99.0407
XLOC_001023	tax-2	0.490838	0.36862	0.312673	0.243438	0.129065	0.150004	1.17213	0.522507
XLOC_001024	C31H5.1	0.441871	0.456928	0	0.359988	0.53376	0.244745	0.898799	1.13849
XLOC_001028	C31H5.7	1.32539	0.461367	2.47212	0.482362	0.427238	0.974936	4.25888	1.88454
XLOC_001030	W06D4.2	66.1195	62.4797	16.5282	54.5116	60.8019	7.94644	145.127	123.26
XLOC_001031	W06D4.3	9.20531	9.79726	1.73093	7.94944	10.4945	1.08326	20.7335	19.5272
XLOC_001032	rad-54	12.8473	12.8829	11.1773	12.1759	11.3949	9.15604	36.9075	32.7268
XLOC_001035	mef-2	9.75787	8.98811	15.2881	8.17532	7.77797	9.57867	34.0341	25.532
XLOC_001036	gld-4	36.2711	38.3716	25.6281	32.7105	32.2462	22.2363	100.271	87.193
XLOC_001037	ZK858.8	29.6926	26.1076	2.59052	22.4676	25.3381	1.52331	58.3907	49.329
XLOC_001038	mel-26	41.3082	39.0678	32.3153	35.2646	38.4376	33.018	112.691	106.72
XLOC_001040	H32K16.1	12.3588	10.7667	4.67709	5.37104	3.30696	6.33358	27.8026	15.0116
XLOC_001042	F25H5.7	9.92304	10.9749	1.97809	7.9246	10.1484	0.827986	22.876	18.901
XLOC_001043	F25H5.10	33.7275	35.2753	91.7381	19.2421	16.8572	92.8741	160.741	128.973
XLOC_001044	eef-2	2093.59	2197.74	1700.05	1897.89	1798.48	1810.56	5991.38	5506.93
XLOC_001045	pyk-1	220.895	209.203	211.575	183.871	178.937	236.054	641.673	598.862
XLOC_001048	C45G3.5,gip-2	32.1195	27.9144	26.2142	25.8877	31.0737	27.0734	86.2481	84.0348
XLOC_001049	F36H2.6	6.24753	4.62469	0.483704	4.51747	3.62618	0	11.3559	8.14365
XLOC_001052	prom-1	14.4065	14.835	9.19918	13.4546	14.1275	6.70596	38.4407	34.2881
XLOC_001053	rab-5	129.504	140.499	137.01	142.544	134.391	144.92	407.013	421.855
XLOC_001054	uev-3	15.1743	12.6852	16.2752	18.6403	22.6488	15.291	44.1347	56.5801
XLOC_001055	F26H9.8	7.09243	6.05245	2.05364	5.88403	6.26445	1.75976	15.1985	13.9082
XLOC_001058	C12C8.2	21.4707	19.4987	55.4134	21.7247	25.6291	56.4142	96.3828	103.768
XLOC_001061	dyf-5	0.807717	1.07978	1.16025	0.883142	1.1856	0.946869	3.04775	3.01561
XLOC_001063	F16A11.5	0.274519	0.096745	0.38354	0.0936201	0.497972	0.143128	0.754804	0.73472
XLOC_001067	C17E4.2	0.621826	0.596915	0.630202	0.779513	0.794389	1.16448	1.84894	2.73838
XLOC_001068	C17E4.4	15.1331	14.7832	10.9105	14.7434	20.2302	11.0724	40.8268	46.046
XLOC_001069	C17E4.6	35.8021	35.0992	29.5057	32.702	32.5356	26.7169	100.407	91.9545
XLOC_001070	nkb-1	156.067	150.757	156.395	153.484	156.093	169.866	463.219	479.443
XLOC_001071	C17E4.10	16.3001	20.8409	16.5637	18.4264	18.5403	16.5614	53.7047	53.5281
XLOC_001074	F46A9.1	23.432	21.4363	11.1965	24.1128	26.7135	7.61351	56.0648	58.4398
XLOC_001075	F46A9.2	15.2	13.4957	1.48145	13.5134	14.7143	1.35268	30.1771	29.5804
XLOC_001076	twk-29	3.12145	2.94035	3.15981	2.84583	2.76553	2.52066	9.22161	8.13202
XLOC_001077	skr-1,skr-2	505.117	483.336	457.529	470.029	466.495	459.568	1445.98	1396.09
XLOC_001078	F30A10.14	17.1383	9.11018	0	2.38573	1.70096	0	26.2485	4.08669
XLOC_001079	F30A10.11	0	1.93291	2.50439	0	0	1.96412	4.4373	1.96412
XLOC_001080	F30A10.12	27.3366	27.2795	1.94399	22.134	19.4473	1.54856	56.5601	43.1299
XLOC_001081	F30A10.15	0	0	0.977788	1.13011	0.330182	0	0.977788	1.46029
XLOC_001082	F30A10.4	0.0836397	0.0856499	0.119772	0.091421	0.243497	0.0960317	0.289062	0.43095
XLOC_001083	sac-1	68.3113	69.7239	60.4925	73.3702	68.8098	64.8995	198.528	207.079
XLOC_001084	F30A10.7	4.55189	4.44473	1.65862	3.88075	4.656	1.20974	10.6552	9.74649
XLOC_001085	stn-1	16.2102	16.4566	21.2475	18.768	16.808	19.1882	53.9143	54.7642
XLOC_001086	usp-48	29.2545	28.3558	19.4099	24.498	26.2956	15.4175	77.0202	66.2111
XLOC_001087	klp-16	28.8849	28.4878	15.9781	23.7226	24.4992	16.5777	73.3508	64.7995
XLOC_001088	set-32	6.37117	6.21322	5.08502	5.54131	6.15602	4.08728	17.6694	15.7846
XLOC_001089	ahr-1	0.530731	0.494232	1.21945	0.405387	0.357555	0.544353	2.24441	1.30729
XLOC_001090	C41G7.13	0	4.03165	4.13088	4.02128	3.56238	4.21153	8.16253	11.7952
XLOC_001093	C36F7.2	14.0362	11.9609	8.22993	10.5295	10.9641	6.90332	34.227	28.3969
XLOC_001099	F42H11.1	4.20593	3.76858	0.389739	3.13991	3.02268	0.550633	8.36425	6.71322
XLOC_001100	K07A1.5	32.5865	33.029	1.70342	23.8168	24.6957	1.2655	67.3189	49.778
XLOC_001101	dut-1	29.8022	26.0909	40.9681	23.363	24.8053	32.0142	96.8612	80.1825
XLOC_001105	aqp-9	12.1924	10.576	25.024	17.969	13.0193	26.1009	47.7924	57.0892
XLOC_001106	nra-2	143.285	147.575	127.812	137.161	140.729	143.786	418.672	421.676
XLOC_001107	T05F1.2	19.2324	19.6369	5.53489	13.8349	12.043	4.45751	44.4042	30.3354
XLOC_001108	hsr-9	60.0314	56.8771	37.1591	48.7552	48.4307	31.8481	154.068	129.034
XLOC_001109	T05F1.4	27.3332	28.914	32.3594	27.244	25.8288	34.0585	88.6066	87.1313
XLOC_001111	T05F1.8	40.4948	33.504	8.30604	34.787	32.7423	5.52821	82.3048	73.0575
XLOC_001112	T05F1.9	0.641094	0.655556	0.892892	0.927065	0.819415	0.955774	2.18954	2.70225
XLOC_001113	T05F1.11,T05F1.13	8.88595	9.49159	14.352	11.4125	10.7564	19.7584	32.7295	41.9273
XLOC_001114	asfl-1	31.5409	29.5791	20.241	26.266	26.3973	13.6202	81.361	66.2835
XLOC_001115	cel-1	20.8929	19.5992	21.6325	19.1067	21.329	20.4276	62.1246	60.8633
XLOC_001116	rpl-24.2	214.675	211.658	132.172	193.014	179.349	129.024	558.505	501.387
XLOC_001118	ikb-1	7.42495	8.39832	11.4439	9.92818	8.71334	8.63292	27.2672	27.2744
XLOC_001119	rpl-14	3579.24	3657.88	3011.04	3524.7	3285.5	3218.19	10248.2	10028.4
XLOC_001122	eat-16	15.5664	14.8957	16.2182	13.2891	15.7775	17.1748	46.6803	46.2414
XLOC_001123	ceh-5	6.32273	6.12967	1.31187	4.82309	3.39425	3.10574	13.7643	11.3231
XLOC_001124	C16C2.9	0	0	0	0	0	213.815	0	213.815
XLOC_001126	gfi-2	59.3869	62.8263	45.5145	51.1369	47.7508	44.5347	167.728	143.422
XLOC_001128	K02A11.2	3.26349	2.05234	1.77047	1.95866	3.64559	0	7.0863	5.60425
XLOC_001132	sur-6	73.3628	70.3457	55.737	72.4871	71.0465	56.1452	199.445	199.679
XLOC_001133	F26E4.6	1250.58	1281.74	1495.19	1332.09	1291.63	1693.51	4027.51	4317.23
XLOC_001134	F26E4.7	7.3755	7.66253	10.0176	9.20283	8.59659	11.8391	25.0556	29.6385
XLOC_001135	F26E4.12	81.7927	84.2089	69.9	71.9839	75.5506	78.6446	235.902	226.179
XLOC_001137	cco-1	744.819	768.916	866.077	763.824	736.379	981.039	2379.81	2481.24
XLOC_001138	hrdl-1	46.9733	45.711	46.2004	46.5191	42.2959	45.1598	138.885	133.975
XLOC_001139	F35C12.4	0	36.638	0	0	0	0	36.638	0
XLOC_001140	ncx-4	3.13006	3.91916	6.73655	4.11288	3.39716	6.17494	13.7858	13.685
XLOC_001142	nhr-62	3.21594	2.98338	4.27341	3.96634	3.91148	6.4873	10.4727	14.3651
XLOC_001143	zig-1	29.3946	27.1292	34.643	29.5602	29.0795	31.1739	91.1668	89.8136
XLOC_001144	K10C3.4	20.3352	19.8067	15.7244	17.0133	16.4108	13.6155	55.8663	47.0396
XLOC_001147	K10C3.5	40.4512	37.6579	24.8531	33.8088	35.2436	21.9803	102.962	91.0327
XLOC_001148	nhr-49	52.0497	55.2452	58.642	50.6618	46.0008	63.7947	165.937	160.457
XLOC_001149	inx-20	2.06068	1.43288	1.82064	1.79243	2.25665	1.2644	5.3142	5.31348
XLOC_001152	nas-5	3.70837	2.72203	1.2464	2.27436	1.92256	1.00321	7.6768	5.20013
XLOC_001155	lsl-1	42.7767	42.6519	26.3659	44.3328	38.9073	20.8153	111.794	104.055
XLOC_001161	F52F12.8	20.8697	19.2801	2.04348	18.9851	20.7953	1.20619	42.1933	40.9866
XLOC_001163	F52F12.7,F52F12.9	26.029	23.5884	38.4608	28.7563	31.243	46.1034	88.0782	106.103
XLOC_001164	Y106G6A.4	70.8955	62.5941	4.27518	47.2652	51.119	3.46819	137.765	101.852
XLOC_001167	sqv-5	24.3492	22.2999	27.5719	22.0354	24.106	24.6473	74.221	70.7887
XLOC_001169	mom-5	44.5898	41.2065	35.1297	38.7429	40.4841	30.2363	120.926	109.463
XLOC_001171	his-68	15.5789	20.2024	4.5391	14.986	14.4152	3.29598	40.3204	32.6972
XLOC_001172	T23D8.7	13.9462	12.7163	6.49468	9.59296	10.6286	3.83614	33.1572	24.0577
XLOC_001176	C03C11.1	47.8019	45.2659	4.21949	36.4558	38.8777	1.63737	97.2873	76.9709
XLOC_001177	fog-3	7.39336	7.87258	20.0771	10.0898	11.0507	15.2892	35.343	36.4297
XLOC_001178	F10G8.1	25.4372	22.9081	8.08496	23.3026	22.3545	4.16268	56.4303	49.8198
XLOC_001179	eak-6	0.0926267	0.288722	0.21467	0.0829524	0.0732975	0.259065	0.596019	0.415315
XLOC_001180	npp-17	55.6747	60.5244	43.4086	51.8086	56.7952	42.0679	159.608	150.672
XLOC_001181	F10G8.6,F10G8.9,ercc-1	82.5331	86.7174	75.4662	84.8608	84.036	94.7073	244.717	263.604
XLOC_001183	B0379.1	80.472	78.0472	64.5806	73.2249	64.9935	62.0029	223.1	200.221
XLOC_001184	mut-16	24.7832	24.2487	19.012	22.5273	23.3308	18.6415	68.0439	64.4996
XLOC_001189	Y106G6D.4	9.65071	6.52685	3.07978	7.39407	9.05532	3.24817	19.2573	19.6976
XLOC_001190	Y106G6D.8	80.5601	63.9907	58.2149	63.9661	58.2195	64.1881	202.766	186.374
XLOC_001191	Y106G6D.7	21.8291	20.8782	18.9935	18.7555	18.7046	17.075	61.7008	54.5351
XLOC_001193	F16C3.1	3.44262	2.76185	4.63988	3.22017	2.94508	5.82537	10.8443	11.9906
XLOC_001194	F16C3.3	1.61335	1.53054	4.46077	1.75286	2.12193	4.12029	7.60466	7.99508
XLOC_001195	F16C3.4	8.82283	10.7548	1.35172	8.19512	8.2244	2.13089	20.9293	18.5504
XLOC_001196	C25A1.1	27.15	27.2279	20.863	24.4865	25.7797	19.5992	75.2409	69.8654
XLOC_001198	C25A1.5	61.7327	58.0102	77.878	76.9989	76.6367	79.5821	197.621	233.218
XLOC_001199	C25A1.6	398.536	398.852	315.187	364.842	381.02	280.253	1112.57	1026.12
XLOC_001200	iars-2	35.5461	38.2824	45.5409	33.8989	35.2152	50.781	119.369	119.895
XLOC_001201	rsa-1	19.057	14.6289	12.7377	15.7701	18.737	12.3487	46.4236	46.8558
XLOC_001202	C25A1.13	45.5656	42.2412	33.6255	43.6307	41.9667	44.1943	121.432	129.792
XLOC_001204	Y106G6E.2	0.328205	0.315631	0	0.176913	0.0678169	0.0104812	0.643836	0.255211
XLOC_001205	Y106G6E.3	1.11376	0.263006	0.00617354	0.542825	0.809237	0.255904	1.38294	1.60797
XLOC_001207	lin-11	6.68348	5.84693	8.74575	6.7002	7.66813	6.95413	21.2762	21.3225
XLOC_001209	T20F10.8	0.19455	0	0	0	0.0938667	0	0.19455	0.0938667
XLOC_001210	T20F10.2	29.0502	29.3112	44.4259	31.6131	30.5159	45.8801	102.787	108.009
XLOC_001211	T20F10.7	0	0	0.104022	0	0	0	0.104022	0
XLOC_001212	T20F10.6	0	0.088289	0	0.0479933	0	0	0.088289	0.0479933
XLOC_001216	dlc-6	10.6298	14.3502	2.66608	13.1641	12.3656	1.40073	27.6461	26.9304
XLOC_001217	Y106G6G.1	14.6432	11.6336	2.6592	12.3674	11.3997	1.5038	28.936	25.2709
XLOC_001218	rps-7	4438.85	4733.36	3946.3	4230.28	3984.17	4113.82	13118.5	12328.3
XLOC_001219	aph-2,ears-1	133.016	131.206	106.089	125.463	123.299	113.571	370.311	362.333
XLOC_001220	ZC434.7	43.0108	44.958	63.6982	46.2584	49.7549	69.1557	151.667	165.169
XLOC_001221	ZC434.9	52.1416	49.2544	20.0664	49.1065	47.6904	15.0716	121.462	111.868
XLOC_001222	-	3.10634	1.1944	0	0.91694	0.816135	0	4.30074	1.73307
XLOC_001223	sptf-1	7.64527	5.55588	7.1774	2.68402	4.04105	5.24765	20.3786	11.9727
XLOC_001225	F45H11.3	21.9836	21.4554	14.7203	18.3458	19.1626	13.3511	58.1593	50.8595
XLOC_001226	F45H11.5	154.576	145.227	188.087	198.595	186.487	218.584	487.89	603.666
XLOC_001230	tag-353	78.2754	77.7189	66.7269	81.6085	83.5276	62.9701	222.721	228.106
XLOC_001232	blmp-1	10.7439	11.648	32.4942	21.3019	21.0546	40.7544	54.8861	83.1109
XLOC_001233	Y106G6H.1	36.234	33.578	30.436	38.1155	35.8505	57.2549	100.248	131.221
XLOC_001235	rpl-30	3666.84	4037.41	3349.99	3767.61	3576.89	3767.86	11054.2	11112.4
XLOC_001236	sec-8	20.0984	21.6104	21.0346	21.2685	20.8419	19.8956	62.7434	62.006
XLOC_001237	Y106G6H.8	46.1753	44.8475	52.2046	50.0961	46.9078	66.4094	143.227	163.413
XLOC_001238	Y106G6H.10	0	0	0	0	0.147838	0	0	0.147838
XLOC_001239	Y106G6H.13	122.774	102.939	12.7519	80.3112	92.1048	3.99427	238.465	176.41
XLOC_001240	Y106G6H.16	7.34221	7.3401	6.74714	8.96385	8.47031	8.29078	21.4294	25.7249
XLOC_001241	F37D6.3	0.892844	0.313972	2.45275	0.958959	0.574484	1.59989	3.65957	3.13333
XLOC_001245	tag-68	3.08533	4.34831	5.80309	4.72981	4.53642	4.08505	13.2367	13.3513
XLOC_001247	F59C6.8	2.65456	2.1045	6.41922	5.29772	5.92912	6.74804	11.1783	17.9749
XLOC_001248	F59C6.16	30.3354	9.38543	12.8399	10.0882	2.97939	17.1416	52.5607	30.2092
XLOC_001249	exos-3	37.4948	32.7671	24.2487	35.8567	33.0157	25.8051	94.5106	94.6775
XLOC_001250	F59C6.5	364.522	376.404	491.606	389.573	378.014	541.475	1232.53	1309.06
XLOC_001251	F59C6.12	3.05627	5.86639	11.8384	6.10961	6.56098	11.6994	20.7611	24.37
XLOC_001252	F59C6.2	22.1869	25.3307	6.74073	22.3829	24.5106	4.32547	54.2583	51.219
XLOC_001253	F59C6.3	22.0111	16.9318	2.70222	16.0848	18.8735	2.35124	41.6451	37.3095
XLOC_001254	F59C6.14	20.8022	17.6397	20.5727	30.7254	25.4398	37.5807	59.0146	93.7459
XLOC_001255	F59C6.11	11.996	12.9014	10.6964	13.7785	13.2268	21.5916	35.5938	48.5969
XLOC_001256	F25H2.2	10.3801	8.92314	13.6628	10.9344	9.80573	13.7305	32.966	34.4706
XLOC_001257	F25H2.3	0	0.115777	0.155849	0	0.107892	0.248982	0.271626	0.356874
XLOC_001258	F25H2.4	68.7052	86.7362	58.1674	72.5183	79.3604	72.0038	213.609	223.882
XLOC_001259	F25H2.6	37.1754	42.0909	33.819	37.4602	34.7113	35.5437	113.085	107.715
XLOC_001260	F25H2.7	10.9346	12.5777	14.4957	11.4005	11.0431	13.8135	38.008	36.2571
XLOC_001261	ubc-25	55.9795	54.2468	46.908	47.9265	52.1394	37.6495	157.134	137.715
XLOC_001263	pas-5	269.34	270.746	241.28	273.004	258.506	261.086	781.366	792.596
XLOC_001264	rla-0	4110.97	4320.28	3322.95	4083.07	3862.05	3758.9	11754.2	11704
XLOC_001265	F25H2.12,rtel-1,tct-1	2535.59	2572.93	2219.39	2528.33	2421.95	2334.49	7327.91	7284.77
XLOC_001266	F25H2.14	26.0024	35.9279	0	29.089	21.0443	14.6605	61.9303	64.7938
XLOC_001267	F29C6.1	16.0457	10.9857	61.3298	18.4073	19.4041	70.6561	88.3612	108.468
XLOC_001269	lst-1	26.1246	23.176	25.651	24.4618	27.7999	19.2204	74.9516	71.4821
XLOC_001270	set-18	40.0933	41.8198	39.6721	36.9178	42.0327	35.2214	121.585	114.172
XLOC_001272	T22A3.6	3.98765	4.88277	0.327524	3.37151	3.81541	0.114697	9.19794	7.30162
XLOC_001273	pash-1	13.2105	13.2864	7.71971	10.0291	11.4529	7.10522	34.2166	28.5872
XLOC_001275	lam-3	0.971489	1.00951	5.33265	1.65925	1.83805	6.73834	7.31365	10.2356
XLOC_001276	C43H8.2	23.1626	22.2231	22.0343	20.826	21.0547	22.429	67.42	64.3097
XLOC_001277	B0511.6,C43H8.1	136.716	132.778	81.4909	120.433	121.164	73.1208	350.985	314.718
XLOC_001278	cutl-14	5.12571	6.31655	10.9718	7.89284	10.2738	10.6638	22.4141	28.8304
XLOC_001280	tag-344	18.2047	18.6256	3.50679	15.7873	17.8323	1.6398	40.3371	35.2594
XLOC_001281	fbxa-125	9.02329	8.41147	2.71377	7.41397	8.54115	1.32599	20.1485	17.2811
XLOC_001282	B0511.2	0.352305	0.670582	0	0.439309	0.238563	0.40601	1.02289	1.08388
XLOC_001283	fkb-7	1.11381	1.03403	25.7559	2.77087	4.49804	43.0812	27.9037	50.3501
XLOC_001284	C34B2.3	18.4029	18.8226	4.92453	14.816	16.5228	2.63927	42.15	33.9781
XLOC_001285	kbp-5	37.3243	32.7166	21.3014	37.7146	34.6051	21.4023	91.3423	93.722
XLOC_001286	C34B2.11,tag-272	7.29123	5.29404	21.1106	12.8424	13.3624	21.8578	33.6959	48.0626
XLOC_001287	B0205.10	66.1014	65.3432	16.3218	58.2098	62.762	10.5874	147.766	131.559
XLOC_001288	B0205.9	11.713	13.3767	10.5257	10.7962	11.1092	9.486	35.6154	31.3914
XLOC_001290	B0205.14	2.26977	2.33989	35.7939	7.48415	4.32118	47.6437	40.4036	59.449
XLOC_001291	B0205.12	160.063	208.529	290.384	198.568	179.855	284.48	658.976	662.903
XLOC_001292	kin-3	234.127	240.322	202.639	241.799	231.498	214.737	677.088	688.034
XLOC_001293	B0205.6	56.5715	58.4569	85.4252	60.747	62.4273	90.0769	200.454	213.251
XLOC_001294	B0205.5	0	2.972	0	3.19439	0	0	2.972	3.19439
XLOC_001295	daf-16	55.6566	55.5063	56.7	50.7667	49.5941	63.1571	167.863	163.518
XLOC_001296	F55A3.2,F55A3.3	70.101	67.6964	50.6037	63.4305	62.9537	46.8399	188.401	173.224
XLOC_001297	C35E7.9,marc-6	46.708	48.6721	31.5044	39.3654	40.1302	34.1202	126.885	113.616
XLOC_001299	C35E7.8	14.3969	14.5818	15.5847	16.2038	15.8143	10.6429	44.5634	42.661
XLOC_001300	C35E7.7	0.708042	0	0	0.382566	0.341716	0.379139	0.708042	1.10342
XLOC_001301	C35E7.6	8.78064	8.10288	12.7811	8.85557	7.79192	13.7062	29.6646	30.3537
XLOC_001302	C35E7.5	0.0921722	0	0.159123	0.03725	0.022076	0.127319	0.251295	0.186645
XLOC_001303	-	59.2138	25.9224	0	33.2346	53.9134	0	85.1362	87.148
XLOC_001304	C35E7.4	2.86604	3.53988	2.72895	3.27838	2.90697	3.35457	9.13487	9.53992
XLOC_001306	C35E7.2	1.35823	1.97288	2.37189	1.55631	1.1455	1.88199	5.703	4.5838
XLOC_001307	C35E7.11	5.36055	3.18413	5.85261	4.13654	4.22205	6.17264	14.3973	14.5312
XLOC_001308	vet-2	0.132573	0.0458863	0.244886	0.0957569	0.0424976	0.486345	0.423345	0.624599
XLOC_001311	Y37F4.1	10.0005	9.83069	3.3696	10.7662	10.6286	1.73667	23.2008	23.1315
XLOC_001313	bath-25	0	0	0.268327	0	0.0928621	0.106887	0.268327	0.199749
XLOC_001314	mop-25.3	10.278	8.48299	6.39322	8.50034	10.296	4.87265	25.1542	23.669
XLOC_001315	T27C10.8	45.6078	44.0646	5.75637	43.0656	35.4742	4.03741	95.4288	82.5772
XLOC_001316	srt-62	0	0.146931	0	0	0.136914	0	0.146931	0.136914
XLOC_001317	srt-61	0.130486	0	0	0.142684	0.250637	0	0.130486	0.393321
XLOC_001318	F49D11.4	0	0	0.224887	0.0866018	0.230672	0	0.224887	0.317274
XLOC_001319	F49D11.3	1.02185	1.39994	2.37437	1.35784	2.51917	1.27182	4.79616	5.14883
XLOC_001320	F49D11.2	0.161156	0.249089	0.22147	0.607769	0.307979	0.437913	0.631715	1.35366
XLOC_001323	prp-17	37.1245	35.1794	34.3134	37.2813	35.7242	31.5752	106.617	104.581
XLOC_001324	Y95D11A.3	17.1296	13.4586	8.86163	12.0959	14.0136	9.4766	39.4498	35.5861
XLOC_001325	Y95D11A.1	56.805	58.9936	69.1009	48.041	54.1571	75.4492	184.899	177.647
XLOC_001327	Y52B11A.3	17.4633	16.5323	15.0499	15.7457	15.5162	14.7795	49.0455	46.0414
XLOC_001329	Y52B11A.12	0	0.264454	0.179156	0.139771	0.245969	0.28242	0.44361	0.66816
XLOC_001330	clec-92	0	0.38679	0.242492	0.194724	0.174124	0	0.629282	0.368848
XLOC_001331	Y52B11A.8	8.91424	6.02597	6.56993	4.40275	2.81855	9.24542	21.5101	16.4667
XLOC_001332	Y52B11A.10	21.5106	20.8095	12.6719	18.6906	20.2915	12.3251	54.992	51.3072
XLOC_001333	Y52B11B.1	11.3408	13.5692	28.8887	54.0803	41.4106	19.8923	53.7987	115.383
XLOC_001336	clec-94	0.174496	0	0	0	0	0	0.174496	0
XLOC_001337	clec-95	0.171868	0.366373	0.699016	0.186587	0	0.185948	1.23726	0.372535
XLOC_001338	clec-96	0	0.255803	0	0	0	0	0.255803	0
XLOC_001339	clec-97	2.82987	1.25761	0	0.256573	0.227927	0	4.08748	0.4845
XLOC_001341	ZK39.10	8.12634	9.67156	0.393891	8.5056	9.25685	0.614258	18.1918	18.3767
XLOC_001343	sri-5	0.466765	0.247038	0	0.139084	0	0.376423	0.713803	0.515507
XLOC_001344	ztf-6	5.489	4.57096	17.9737	7.0952	6.91957	17.0709	28.0337	31.0857
XLOC_001345	Y53H1A.2	19.3925	17.6519	13.8481	13.2387	18.5318	16.4457	50.8925	48.2162
XLOC_001346	nfya-2	9.99028	9.39788	7.77843	9.17684	7.47154	7.32919	27.1666	23.9776
XLOC_001349	F46A8.11	2.94961	1.12615	2.78609	1.46875	2.20174	2.66942	6.86185	6.33991
XLOC_001350	F46A8.1	0.830091	0.698385	0.917337	1.09586	0.798794	1.28032	2.44581	3.17497
XLOC_001351	F46A8.9	6.87645	8.66171	2.28987	9.55252	9.3672	0.650724	17.828	19.5704
XLOC_001352	scrm-6	19.3443	17.8523	1.59324	14.0467	13.6489	0.212791	38.7898	27.9084
XLOC_001353	F36D1.7	7.80882	10.944	4.2538	8.83047	9.33609	5.03277	23.0066	23.1993
XLOC_001359	F36D1.4	92.346	67.8472	4.11062	47.6862	41.6185	0	164.304	89.3047
XLOC_001363	sru-47	0.278722	0	0	0	0.134716	0	0.278722	0.134716
XLOC_001365	Y53H1B.4	0	0	0.434035	0	0	0	0.434035	0
XLOC_001366	Y53H1B.6	0.280434	0.0444181	0.0206007	0	0.0234908	0	0.345453	0.0234908
XLOC_001367	cdk-9	24.5106	23.6643	22.1686	23.4071	24.3276	22.6528	70.3435	70.3875
XLOC_001368	M04D5.1	0.0321705	0	0	0	0	0	0.0321705	0
XLOC_001370	pes-2.1	0	0	0	0	0.0557941	0	0	0.0557941
XLOC_001371	F56G4.4	18.9066	18.0013	16.7376	20.1821	17.1993	14.9437	53.6455	52.3251
XLOC_001372	png-1	23.8274	25.8121	28.8756	30.0494	25.9683	33.3123	78.5151	89.33
XLOC_001377	Y53H1C.3	4.62802	3.63311	0.620314	3.88183	3.4663	0.100912	8.88144	7.44904
XLOC_001378	C27C7.7	0.084751	0	0	0	0	0	0.084751	0
XLOC_001380	nhr-244,nhr-74	1.63978	4.82001	19.3123	11.2722	9.58277	28.0498	25.7721	48.9048
XLOC_001382	nhr-259	0.341095	0.889482	10.7577	1.34061	1.63977	18.0707	11.9883	21.0511
XLOC_001383	C27C7.1	23.1973	21.5118	24.0199	21.8229	21.9797	17.15	68.729	60.9526
XLOC_001384	ZK1025.1	1.43792	1.3124	1.20002	1.30117	1.29554	1.06352	3.95034	3.66023
XLOC_001389	bah-1	7.53472	9.53634	63.3396	30.894	34.1284	59.2698	80.4107	124.292
XLOC_001390	ZK1025.8	60.8423	77.0807	172.298	200.881	114.628	160.495	310.221	476.004
XLOC_001392	nhr-245	0.75968	0.850098	17.7235	2.18363	1.82391	25.4254	19.3333	29.4329
XLOC_001393	K08C9.5	0.129188	0	0.355058	0.139508	0	1.80468	0.484246	1.94419
XLOC_001394	F32B4.8	0.185287	0.389565	3.35812	1.26005	1.11206	3.61905	3.93297	5.99116
XLOC_001396	F32B4.1	0.242716	0.168668	0.225375	0.26343	0.312819	0.446332	0.636759	1.02258
XLOC_001397	F32B4.6	0.127712	0	0	0	0	0	0.127712	0
XLOC_001398	F32B4.4	20.9262	21.1909	15.3916	19.9561	19.0965	15.4669	57.5087	54.5195
XLOC_001402	F15D3.9	3.40822	3.42474	1.17483	1.81956	4.07361	1.85661	8.00779	7.74978
XLOC_001403	col-66	0	0	0	0	0	0.162346	0	0.162346
XLOC_001404	F15D3.4	7.64756	7.81865	1.69334	7.42258	6.75007	0.665937	17.1595	14.8386
XLOC_001406	F15D3.7	126.515	132.826	201.722	124.056	113.993	239.52	461.063	477.569
XLOC_001410	C17D12.5	14.3908	16.0373	3.51286	13.8356	14.2627	0.301409	33.941	28.3997
XLOC_001411	unc-75	0.561453	0.476455	0.7503	0.541336	0.646073	0.353524	1.78821	1.54093
XLOC_001413	C17D12.1	44.1946	47.2484	45.9118	47.2361	46.2294	55.078	137.355	148.543
XLOC_001415	Y47H9A.1	0	0.128041	0.113138	0.088997	0	0	0.241179	0.088997
XLOC_001418	W04G5.3	0	4.41378	0	0	0	0	4.41378	0
XLOC_001419	W04G5.4	0	0.0709112	0.192543	0.149917	0.0662496	0.229612	0.263454	0.445779
XLOC_001420	W04G5.5	0	0	0	0.200305	0.266044	0	0	0.466349
XLOC_001422	W04G5.9	0	0	0	0.211956	0	0	0	0.211956
XLOC_001423	W04G5.12	0	0	0	0.52683	0	0	0	0.52683
XLOC_001426	W04G5.8	0.181581	0	0	0	0.175317	0.0998864	0.181581	0.275203
XLOC_001434	kpc-1	14.6065	16.7543	23.374	20.2048	21.1996	23.8005	54.7348	65.2049
XLOC_001435	F11A6.3	0	0.639022	0.560388	0	0.391948	0.221574	1.19941	0.613522
XLOC_001437	pgrn-1	68.7295	69.8053	66.0719	70.8609	58.6996	102.294	204.607	231.854
XLOC_001441	Y47H9B.2	8.87551	6.53524	1.16697	6.28105	7.85594	0.393286	16.5777	14.5303
XLOC_001444	T02G6.3	0.175358	0.185687	0	0	0	0	0.361045	0
XLOC_001445	T02G6.5	0.246709	0.175628	0.173182	0	0	0	0.595519	0
XLOC_001448	dhhc-2	16.4727	17.5454	22.3255	17.9689	17.793	15.291	56.3436	51.0529
XLOC_001450	dnj-27	15.6578	17.871	50.1553	21.7333	25.9384	43.9045	83.6841	91.5762
XLOC_001453	Y47H9C.8	17.1864	16.6637	15.1073	17.0252	15.1649	16.6571	48.9574	48.8472
XLOC_001454	Y47H9C.12,fbxa-216	10.826	8.74788	9.81395	10.2129	10.3133	14.001	29.3878	34.5272
XLOC_001455	Y47H9C.11	2.55205	2.21745	2.30766	2.49574	1.96768	1.90273	7.07716	6.36615
XLOC_001456	R09B3.6	3.36054	3.30619	6.2977	4.39022	4.91951	7.47239	12.9644	16.7821
XLOC_001457	ubc-12	58.6485	63.1076	51.5845	52.3619	59.0575	56.5871	173.341	168.006
XLOC_001458	R06C1.4	945.768	978.974	1059.31	1022.66	972.317	1422.01	2984.05	3416.99
XLOC_001462	R06C1.6	2.49236	2.75113	4.07585	2.67126	3.01693	3.16203	9.31934	8.85022
XLOC_001464	R06C1.11	0	0	0	0	3.01442	0	0	3.01442
XLOC_001465	Y53C10A.1	14.0597	12.3742	5.84905	10.1858	9.66889	7.42584	32.2829	27.2805
XLOC_001469	rga-2	4.38333	4.6501	6.20847	5.19271	5.11391	6.02769	15.2419	16.3343
XLOC_001471	Y53C10A.5	47.9645	52.2695	37.4065	39.3629	31.1578	51.9858	137.641	122.507
XLOC_001472	Y53C10A.7	6.61152	7.57298	10.3125	6.09915	7.0397	5.52018	24.497	18.659
XLOC_001473	Y53C10A.13,Y53C10A.14	6.2753	5.63092	4.96186	5.40158	5.13665	3.69569	16.8681	14.2339
XLOC_001474	abt-5	11.0677	11.2616	2.23428	10.5529	10.3883	1.01316	24.5636	21.9544
XLOC_001475	Y53C10A.10	5.35835	4.91725	0.30548	3.86359	3.68226	0.14297	10.5811	7.68882
XLOC_001476	F58D5.6	3.59466	3.16247	0.92743	2.53168	2.79582	0.346075	7.68456	5.67358
XLOC_001477	F58D5.5	5.6681	5.27843	5.55881	5.29261	3.60341	5.27798	16.5053	14.174
XLOC_001480	F58D5.3	0.982389	0.546275	1.53963	1.05793	1.07542	0.561328	3.06829	2.69468
XLOC_001481	Y47H10A.6	11.3156	13.356	9.1701	14.2226	10.6778	5.90096	33.8417	30.8014
XLOC_001482	M01G12.8	0.042349	0.0964104	0.0379398	0.11289	0.0904787	0.175704	0.176699	0.379073
XLOC_001487	sri-13	0.415596	0.502507	0.0963321	0.605237	0.400782	0	1.01444	1.00602
XLOC_001492	F15H9.1	4.40759	4.44465	0.226617	4.71427	4.895	0.319866	9.07886	9.92914
XLOC_001493	F15H9.7	0.135032	0.143015	0.188349	0	0	0.150747	0.466396	0.150747
XLOC_001494	R05D7.2	7.71481	7.26937	1.95321	7.32029	5.91331	0.822551	16.9374	14.0562
XLOC_001495	R05D7.8	0	0	0	3.02646	0	0	0	3.02646
XLOC_001496	R05D7.5	16.0229	17.0942	13.8061	16.4631	13.5517	13.4805	46.9232	43.4953
XLOC_001499	C15C6.1	107.599	124.532	94.1897	139.481	142.147	86.2423	326.321	367.87
XLOC_001500	C15C6.2	134.468	130.374	11.8535	89.4892	87.0226	3.752	276.695	180.264
XLOC_001501	C15C6.3	17.2011	17.4463	15.3603	17.4253	15.7402	15.9243	50.0077	49.0898
XLOC_001502	C15C6.4	21.0466	20.6985	19.2968	21.9412	19.841	14.4141	61.0419	56.1963
XLOC_001505	F14B6.6	4.23112	5.71779	4.31116	4.49601	5.23172	7.48536	14.2601	17.2131
XLOC_001506	F14B6.4	0.700032	1.059	0.83244	0.985567	1.36115	1.11029	2.59147	3.45701
XLOC_001507	oac-16	0.109971	0.115716	0	0.120421	0.0533924	0	0.225687	0.173813
XLOC_001509	oac-26	0.0529964	0	0	0	0	0	0.0529964	0
XLOC_001510	nhr-265	0.111457	0	5.46997	0	0.215013	7.54202	5.58143	7.75703
XLOC_001511	F41D3.7	0	0	0	0.681729	0	0	0	0.681729
XLOC_001513	F41D3.12	0	0.0051105	0	0	0	0	0.0051105	0
XLOC_001515	F56H6.13	0	0.128956	0	0	0.120737	0	0.128956	0.120737
XLOC_001518	F56H6.2	0	0	0	0	0.182896	0.104171	0	0.287067
XLOC_001524	oac-36	0	0	0	0.05977	0	0	0	0.05977
XLOC_001526	C47F8.5	0.622575	0.875407	0.859087	0.79013	1.31086	0.798721	2.35707	2.89971
XLOC_001532	T09E11.11	2.95083	4.84126	3.03374	4.87352	2.23791	3.61497	10.8258	10.7264
XLOC_001533	T09E11.8	0.194013	0	0.0893761	0.0707059	0.0625158	0	0.283389	0.133222
XLOC_001534	oac-45	0	0	0	0	0.0561967	0	0	0.0561967
XLOC_001536	oac-43	0	0.0604345	0	0.0631868	0	0	0.0604345	0.0631868
XLOC_001538	T09E11.6	0	0	0	0	0.0747256	0	0	0.0747256
XLOC_001546	E03H4.4	1.4922	1.13456	0	1.57926	1.14008	0	2.62676	2.71934
XLOC_001547	E03H4.5	0	0	0	0	0	0.0868608	0	0.0868608
XLOC_001549	oac-13	0.0546862	0	0	0.059889	0	0.0606172	0.0546862	0.120506
XLOC_001551	E03H4.11	0.0953949	0	0.132618	0.206732	0	0	0.228013	0.206732
XLOC_001552	glct-2	0	0	0	0	0.112295	0	0	0.112295
XLOC_001554	C54C8.2	1.44054	0.900779	3.05752	2.50616	4.06209	1.16284	5.39884	7.73109
XLOC_001555	C54C8.4	0.359625	0.280383	6.61758	0.873232	1.03906	9.14195	7.25759	11.0542
XLOC_001558	C54C8.8	0.298321	0	0.204375	0	0	0.163948	0.502696	0.163948
XLOC_001560	gly-15	0.335504	0.26086	0.115332	0.181143	0.480499	0.181611	0.711696	0.843253
XLOC_001561	T27F6.4	25.5619	26.0207	15.7154	19.5613	18.8252	10.0952	67.298	48.4817
XLOC_001562	T27F6.6,pars-2	68.651	57.9396	65.4772	55.4295	54.7274	90.9992	192.068	201.156
XLOC_001563	T27F6.7	15.4812	13.892	14.5397	12.4138	12.6254	14.4614	43.9129	39.5006
XLOC_001564	K11D2.1	4.18823	4.04541	3.77889	2.68325	3.0867	5.05052	12.0125	10.8205
XLOC_001565	asah-1	21.4931	18.6486	41.7054	16.4954	16.4693	17.9031	81.8471	50.8678
XLOC_001566	K11D2.4,K11D2.5,unc-101	45.5721	40.4526	40.5911	37.9296	42.5395	36.734	126.616	117.203
XLOC_001567	W02D9.2	71.6783	75.0313	62.6994	76.2778	74.498	63.967	209.409	214.743
XLOC_001568	W02D9.3	8.98644	6.90814	6.00204	6.8942	5.96336	3.77556	21.8966	16.6331
XLOC_001569	W02D9.10	18.4286	16.9964	26.1796	17.746	16.0764	25.4553	61.6046	59.2777
XLOC_001570	W02D9.9	0	0	0	2.24057	0	0	0	2.24057
XLOC_001572	C49G9.1,C49G9.2	5.45465	3.60651	6.95703	2.0267	2.99767	9.61211	16.0182	14.6365
XLOC_001573	F33E2.4	1.90655	1.11392	7.59385	2.80604	2.22313	11.5442	10.6143	16.5734
XLOC_001574	F33E2.7	0	0.382891	0.476951	0.386874	0.342858	0.374673	0.859842	1.10441
XLOC_001575	F33E2.6	0	0	0.0483042	0	0	0	0.0483042	0
XLOC_001577	T07D10.2	0.302901	0	0.136267	0.325432	0.193954	0.106044	0.439168	0.62543
XLOC_001578	clec-13	0	0	0.203665	0	0	0	0.203665	0
XLOC_001580	H16D19.3	0.316254	0.252867	0.0575574	0.101112	0.00908846	0.294376	0.626678	0.404576
XLOC_001581	H28O16.1	1296.64	1346.66	1601.35	1220.26	1154.82	1775.63	4244.65	4150.71
XLOC_001583	T26E3.6	0.874565	0	0	0	0	0	0.874565	0
XLOC_001584	T26E3.4	69.3443	60.2013	52.4106	64.6539	66.5907	53.9674	181.956	185.212
XLOC_001585	par-6	27.3349	28.1013	27.2492	28.4697	27.5878	31.7561	82.6854	87.8136
XLOC_001586	ndx-1	11.8141	16.254	22.6394	16.8332	14.9699	27.0792	50.7075	58.8823
XLOC_001587	clec-103	0.16426	0.348673	0.660563	0.175932	0.473115	0.174092	1.1735	0.823139
XLOC_001590	sra-17	0	0.142626	0	0	0	0	0.142626	0
XLOC_001592	sra-18	0.268837	0.141609	0	0.147246	0.390959	0	0.410446	0.538205
XLOC_001598	sra-23	0	0	0	0.146079	0	0	0	0.146079
XLOC_001601	T06G6.6	6.94926	14.0972	272.859	47.594	47.0261	297.913	293.905	392.533
XLOC_001602	srw-88	0	0.121558	0	0	0	0	0.121558	0
XLOC_001603	T06G6.8	1.61974	1.72027	0.121106	1.07007	1.56072	0.095882	3.46112	2.72667
XLOC_001605	pfd-3	73.8629	80.6251	58.2233	68.2099	72.49	60.5488	212.711	201.249
XLOC_001606	toe-4,uba-2	40.0685	38.4257	37.7803	33.5905	36.6261	36.6032	116.275	106.82
XLOC_001607	bath-34	3.64434	3.25776	2.57815	2.859	3.53699	2.44659	9.48025	8.84258
XLOC_001608	bath-35	2.94603	4.01503	2.66267	3.16255	4.49864	2.47795	9.62373	10.1391
XLOC_001609	B0019.2	11.5081	10.7344	8.16175	9.32317	9.12829	8.83024	30.4042	27.2817
XLOC_001610	Y18D10A.26	0.156376	0	0	0	0	0	0.156376	0
XLOC_001611	Y18D10A.4,gsk-3	42.1389	38.6173	39.9945	34.9349	37.5657	39.5863	120.751	112.087
XLOC_001612	nhx-8	30.4457	34.3609	29.648	32.2344	31.0202	33.524	94.4546	96.7786
XLOC_001613	ptr-17	4.17457	4.59395	4.44473	8.29694	9.54562	1.55664	13.2133	19.3992
XLOC_001614	Y18D10A.8	22.4831	21.7575	39.5835	27.0228	27.422	31.7106	83.8241	86.1554
XLOC_001615	clec-104	0.443686	0.316293	0	0.482047	0.286555	0.634017	0.759979	1.40262
XLOC_001616	pad-1	12.3447	13.3748	14.2788	13.5806	13.6111	14.5035	39.9983	41.6952
XLOC_001617	car-1	379.084	368.952	156.041	303.203	308.884	149.618	904.077	761.705
XLOC_001618	fkb-8	8.07081	7.2691	11.2912	6.88911	7.22843	12.3399	26.6311	26.4574
XLOC_001619	fkb-2	760.568	825.655	630.807	744.251	737.341	692.342	2217.03	2173.93
XLOC_001620	pfn-1	286.801	269.771	200.323	225.081	232.995	170.68	756.895	628.756
XLOC_001621	Y18D10A.21	14.3126	14.1526	2.52449	14.4112	12.2573	0.622454	30.9897	27.291
XLOC_001622	Y18D10A.22	1.06307	0.703097	2.4246	2.10355	1.30702	2.24556	4.19077	5.65613
XLOC_001623	tag-138	0	0.33655	0.14872	0	0	0.354598	0.48527	0.354598
XLOC_001624	F08A8.2,acox-1	109.419	125.99	157.559	176.915	170.444	250.898	392.968	598.257
XLOC_001625	F08A8.3,F08A8.4	44.905	45.8455	68.864	71.3651	64.6911	97.004	159.615	233.06
XLOC_001627	eif-6,gale-1	172.263	168.414	138.12	178.221	192.056	189.686	478.797	559.963
XLOC_001628	prx-11	19.8314	18.5028	23.1152	14.8995	17.6759	31.2704	61.4494	63.8458
XLOC_001629	C47B2.9,selb-1	42.5841	39.1864	55.6353	46.2172	37.7095	66.981	137.406	150.908
XLOC_001630	nlp-15	16.8736	15.168	24.4358	18.9409	18.3881	26.6127	56.4774	63.9417
XLOC_001631	smu-1	33.7446	32.9244	25.3496	33.9291	33.7632	24.7447	92.0186	92.437
XLOC_001632	pmr-1	21.9349	22.7133	23.7268	21.1981	21.3476	21.1048	68.375	63.6505
XLOC_001633	W05B5.1,W05B5.4	50.7411	59.4761	57.9636	48.8623	50.2982	61.9264	168.181	161.087
XLOC_001634	npr-14	0.651003	0	0.363755	0.714346	0.506439	0.292221	1.01476	1.51301
XLOC_001635	Y26D4A.2	0.326167	0.343933	0.185286	0.214806	0.255865	0	0.855386	0.470671
XLOC_001641	Y26D4A.20	0.302362	0	0	0	0.290249	0.11232	0.302362	0.402569
XLOC_001646	Y26D4A.10	0.108771	0.111948	0	0	0	0	0.220719	0
XLOC_001647	Y26D4A.21	2.13658	1.91178	0.854657	1.98148	1.17944	1.03244	4.90302	4.19336
XLOC_001648	C17H1.3	0.0830067	0.0865837	0.114498	0.0895299	0.0800387	0.18396	0.284088	0.353529
XLOC_001650	C17H1.5	0.322714	0.082702	0.797362	0.524084	0.467894	0.182721	1.20278	1.1747
XLOC_001654	C17H1.10	0.185401	0.0837666	0.262858	0.299839	0.079326	0.368185	0.532026	0.74735
XLOC_001655	F22G12.1	0.0805755	0.0835028	0.341493	0.525243	0.313716	0.731571	0.505571	1.57053
XLOC_001656	F22G12.7,F22G12.8	1.0454	0.770173	3.00558	0.700766	1.01087	3.97354	4.82115	5.68518
XLOC_001657	F22G12.3	0.108627	0	0	0	0.104083	0	0.108627	0.104083
XLOC_001660	F22G12.5	12.7576	12.6272	10.5591	11.4024	11.1472	10.5301	35.9439	33.0797
XLOC_001661	F17B5.1	2.62578	2.91642	14.0038	3.30893	3.17516	19.762	19.546	26.2461
XLOC_001662	F17B5.8	3.29485	3.45093	4.70036	5.73445	5.62475	6.86893	11.4461	18.2281
XLOC_001664	F17B5.4	0.148511	0	0	0	0	0	0.148511	0
XLOC_001667	ZK1225.1	0.19745	0.102841	1.6217	0.10662	0.379804	2.97158	1.92199	3.458
XLOC_001668	ZK1225.2	0	0.0773496	0.307741	0	0	0.896919	0.385091	0.896919
XLOC_001670	ssp-31	42.0463	35.4325	3.1226	29.7355	22.8296	0.809154	80.6014	53.3743
XLOC_001671	ZK1225.7	4.97787	3.39577	2.95744	4.14098	2.94425	2.24014	11.3311	9.32537
XLOC_001672	ZK1053.2	28.0855	25.324	2.97094	22.4756	21.6276	2.02523	56.3804	46.1284
XLOC_001673	scrm-2	2.07456	1.89518	5.52547	2.24041	2.75465	6.22765	9.49521	11.2227
XLOC_001675	ZK1053.6	8.42939	9.38567	4.69253	7.78513	9.70045	1.71886	22.5076	19.2044
XLOC_001676	ZK1053.4	0.825048	0.474105	0.458178	0.804735	0.793444	0.318233	1.75733	1.91641
XLOC_001677	ZK1053.3	0.312932	0.244304	0.271872	0.465735	0.188567	0.0862439	0.829108	0.740546
XLOC_001678	F44F1.1	1.41439	1.32365	0.341855	1.7068	1.50655	0.343912	3.07989	3.55726
XLOC_001679	F44F1.3	2.7282	2.17246	0	3.02716	2.58207	0.0603678	4.90066	5.6696
XLOC_001681	M01E5.1	1.24983	1.6601	0.571745	1.2683	1.05793	0.449839	3.48168	2.77607
XLOC_001682	top-1	60.6389	59.6301	53.3241	57.1428	62.4098	51.5718	173.593	171.124
XLOC_001686	T04D3.8	12.5853	8.66002	7.95714	15.1442	11.5207	9.74925	29.2025	36.4141
XLOC_001689	gcy-35	0.821369	0.653718	0.804286	0.730932	0.464521	1.06756	2.27937	2.26301
XLOC_001690	snr-2	267.749	274.922	177.919	245.409	217.386	172.346	720.59	635.141
XLOC_001691	Y40B1A.1,tag-210	276.549	276.425	254.53	258.005	255.399	249.489	807.504	762.893
XLOC_001692	Y40B1A.2,Y40B1A.3	11.8409	11.0886	12.0097	9.66498	8.84918	13.7273	34.9392	32.2415
XLOC_001693	C01A2.9	0	2.24758	0	0	0	0	2.24758	0
XLOC_001694	C01A2.6	0.261282	0.138377	0	0	0.376572	0	0.399659	0.376572
XLOC_001695	C01A2.5	45.233	44.0233	45.7178	46.7492	43.2844	46.0443	134.974	136.078
XLOC_001696	C01A2.3,C01A2.4	88.4271	96.776	96.628	92.8729	88.7573	104.498	281.831	286.128
XLOC_001697	C01A2.2	25.1885	24.385	56.3093	37.8364	35.4035	69.1041	105.883	142.344
XLOC_001698	nlp-38	9.37781	10.0415	16.2648	12.2026	13.2159	13.1819	35.6841	38.6004
XLOC_001700	W05H12.3	0	0	0	0	9.66375	0	0	9.66375
XLOC_001701	W05H12.1	12.5624	11.6173	14.9636	11.5542	10.8808	11.1826	39.1433	33.6176
XLOC_001702	Y40B1B.8	15.1811	15.9231	17.8835	15.6193	14.9523	19.6493	48.9877	50.2209
XLOC_001703	eif-3.J	112.538	114.354	70.5436	99.0198	99.75	84.2056	297.436	282.975
XLOC_001704	spr-5	17.941	17.4043	15.0048	16.2446	15.398	17.5354	50.3501	49.178
XLOC_001705	Y48G10A.6	15.602	17.8031	28.2114	19.4367	16.1438	24.1813	61.6165	59.7618
XLOC_001706	rpr-1	8.65401	1.51757	5.91791	0	5.63542	1.61525	16.0895	7.25067
XLOC_001707	Y48G10A.1	65.6225	72.2504	79.4543	76.6217	74.8221	98.4666	217.327	249.91
XLOC_001708	ndx-8	4.68564	3.67121	5.98021	4.78492	4.51709	8.60344	14.3371	17.9055
XLOC_001709	Y87G2A.19	17.9058	15.7832	54.1153	28.9678	27.1973	31.7188	87.8043	87.8839
XLOC_001710	Y87G2A.1	13.225	13.1104	12.2818	14.5025	12.7155	10.7528	38.6172	37.9708
XLOC_001711	Y87G2A.2	31.7348	36.9616	27.8792	30.6987	30.8823	37.3518	96.5756	98.9328
XLOC_001714	Y87G2A.16	1.82413	1.98548	0.801498	0.933589	1.1057	0.83901	4.61111	2.8783
XLOC_001715	grd-15	6.73428	10.6016	2.04702	7.30208	6.76183	2.30725	19.3829	16.3712
XLOC_001716	Y87G2A.7	8.85185	9.72813	8.21953	7.05427	9.1088	10.206	26.7995	26.3691
XLOC_001717	gpi-1	122.956	121.476	204.185	126.225	126.004	229.123	448.617	481.352
XLOC_001718	ubc-14	87.3539	78.653	110.61	88.1029	85.6665	125.723	276.617	299.492
XLOC_001719	Y87G2A.12	0.07831	0.123324	0.0540948	0.0426127	0.113037	0.0429185	0.255729	0.198568
XLOC_001720	unc-59	34.527	32.4348	28.0383	34.0295	33.0147	23.4476	95.0001	90.4918
XLOC_001724	W09C5.11	2.31368	3.18461	14.8876	5.80533	8.23876	14.9201	20.3859	28.9642
XLOC_001725	W09C5.7	24.7666	25.8329	22.0097	21.8373	25.1966	23.2153	72.6092	70.2492
XLOC_001726	W09C5.9	0	0	0.0161116	0.492552	0.438195	0.497923	0.0161116	1.42867
XLOC_001727	W04A4.5	21.3086	19.8328	16.2158	19.699	20.6038	14.905	57.3572	55.2078
XLOC_001728	W04A4.2	34.4713	32.8821	4.64008	24.1993	23.0533	1.04532	71.9935	48.2979
XLOC_001730	Y6B3B.3	0.473192	0.734495	0.206322	0.576453	0.512174	0.196231	1.41401	1.28486
XLOC_001731	Y6B3B.2	0.925045	0.692474	0.199699	0.669003	0.843799	0.0798027	1.81722	1.5926
XLOC_001733	Y6B3B.7	0.609453	2.09445	2.51327	0.493726	1.17888	3.16549	5.21717	4.8381
XLOC_001734	Y6B3B.4	9.01281	8.98491	8.64663	9.75214	9.21096	7.73588	26.6444	26.699
XLOC_001735	Y37H9A.1,Y37H9A.3	16.6708	17.4268	17.9159	17.9002	17.2857	19.4356	52.0135	54.6215
XLOC_001737	Y37H9A.4	2.7871	1.27931	1.71052	1.33429	0.595063	1.36604	5.77693	3.29539
XLOC_001741	W09G3.5	2.34697	2.34831	3.13089	3.18447	2.29433	2.47546	7.82617	7.95426
XLOC_001742	W04A8.2	4.80838	5.1503	6.04468	2.69999	4.41062	3.30893	16.0034	10.4195
XLOC_001743	W04A8.9	0	0.132798	0.710651	0	0.123679	0.140299	0.843449	0.263978
XLOC_001744	W04A8.6	12.8738	13.3683	8.82149	12.1566	12.491	9.848	35.0636	34.4956
XLOC_001745	taf-1	11.8448	11.9825	10.593	11.3037	11.8036	10.4243	34.4203	33.5316
XLOC_001746	Y71A12B.3	0	0	0	0	0.041342	0	0	0.041342
XLOC_001747	trp-4	0.596234	0.433091	0.652078	0.690183	0.55903	0.496984	1.6814	1.7462
XLOC_001749	clec-112	0	0	0.16757	0	0	0	0.16757	0
XLOC_001750	-	2.18719	0.978812	8.71429	4.06582	2.87234	9.36869	11.8803	16.3069
XLOC_001751	Y71A12B.8	0	0.0651415	0	0	0.0603726	0	0.0651415	0.0603726
XLOC_001753	rps-6	2586.43	2909.99	2189.2	2622.96	2464.83	2474.81	7685.62	7562.6
XLOC_001754	Y71A12B.10	0.574719	0.601753	0.497509	0.15531	0.207985	0.5495	1.67398	0.912795
XLOC_001755	Y71A12B.13,Y71A12B.14	3.11208	3.49649	2.49063	2.1896	2.56869	3.06161	9.0992	7.8199
XLOC_001757	Y71A12B.11	0.10784	0.225162	0.148383	0	0	0.117331	0.481385	0.117331
XLOC_001758	Y71A12B.17	0.275678	0.289018	0.597005	0.341995	0.569598	0.603072	1.1617	1.51467
XLOC_001759	Y71A12B.15	0.0922553	0	0.12698	0.049752	0	0.0998877	0.219235	0.14964
XLOC_001760	Y71A12B.18	0.532333	0.514247	1.30101	0.88316	0.828775	1.51457	2.34759	3.2265
XLOC_001761	Y71A12B.12	2.60328	2.01787	4.5456	2.9238	3.90981	3.62564	9.16675	10.4593
XLOC_001764	ZC334.7	7.73868	7.53025	1.97043	8.22427	9.34874	0.437041	17.2394	18.0101
XLOC_001765	ins-29	7.47704	7.80538	50.5089	16.4028	24.0862	37.2328	65.7913	77.7218
XLOC_001766	ins-25	0	5.45915	0	0	5.18155	11.3863	5.45915	16.5678
XLOC_001767	ins-27	152.489	179.973	277.139	172.044	165.412	420.498	609.601	757.954
XLOC_001769	F47G4.6	0.429266	0.447619	0.587895	0	0	0	1.46478	0
XLOC_001771	gpdh-1	20.1274	21.865	2.48767	11.8665	11.7593	2.11556	44.4801	25.7414
XLOC_001772	fbxb-56	0	0	0	0	0.153979	0	0	0.153979
XLOC_001773	fbxb-101	0	0	0.33977	0.132411	0	0.539268	0.33977	0.671679
XLOC_001775	tfg-1	133.876	152.449	121.32	140.729	149.458	144.565	407.645	434.752
XLOC_001776	Y63D3A.7	270.627	271.415	310.167	270.699	253.609	377.432	852.209	901.74
XLOC_001777	Y63D3A.8	21.8476	23.2368	18.4121	24.1451	23.38	19.3772	63.4965	66.9023
XLOC_001778	mys-2	13.5048	13.1148	11.4951	11.9211	13.2254	11.6084	38.1147	36.7549
XLOC_001780	fipr-22	0.170723	0.360856	0.576045	0	0.0838617	0.442151	1.10762	0.526013
XLOC_001781	fipr-24	0.406523	0	2.74523	0.510629	0.781824	2.57689	3.15175	3.86934
XLOC_001782	C37A5.7	3.17036	3.82803	10.5224	3.97373	3.66444	9.11231	17.5208	16.7505
XLOC_001784	C37A5.11	8.78112	13.5001	11.7669	24.2542	8.36028	4.75646	34.0481	37.3709
XLOC_001786	ZK849.5	9.42656	9.96298	5.02977	11.7107	12.3292	2.72467	24.4193	26.7646
XLOC_001788	ZK849.4	7.89554	9.93603	2.75247	8.79869	9.56773	1.89231	20.584	20.2587
XLOC_001789	C49A1.1	0.128486	0.133907	0	0	0.123399	0.283758	0.262393	0.407157
XLOC_001793	C49A1.5	0.0685057	0	0	0	0	0	0.0685057	0
XLOC_001797	K04H8.3	0.634322	1.57987	0	1.37628	1.4303	0.222699	2.21419	3.02928
XLOC_001798	pes-7	24.2659	27.9027	23.1721	24.3558	21.0378	24.0907	75.3407	69.4843
XLOC_001800	fbxb-67	0.231936	0	0.159537	0	0.111504	0	0.391473	0.111504
XLOC_001801	fbxb-8	0	0	0	0	0	0.138537	0	0.138537
XLOC_001802	F49B2.7	0	0	0.456577	0	0	0.538247	0.456577	0.538247
XLOC_001803	F49B2.3	0.0948798	0	0	0	0	0	0.0948798	0
XLOC_001804	F49B2.4	0.928321	0.776857	0	0.505882	0.629368	0	1.70518	1.13525
XLOC_001805	src-2	8.19404	9.00635	17.8476	14.0414	15.5604	14.1535	35.048	43.7553
XLOC_001806	F49B2.6	1.41906	1.36585	2.44837	1.06728	1.22558	1.55281	5.23328	3.84567
XLOC_001807	Y105E8A.3	66.1288	71.4555	67.7588	73.9463	75.5422	75.2472	205.343	224.736
XLOC_001810	eat-18	16.6141	18.3108	18.1139	15.3118	15.4693	12.8034	53.0388	43.5845
XLOC_001811	apg-1	44.3552	43.3522	42.1084	46.3826	42.9409	44.8345	129.816	134.158
XLOC_001812	Y105E8A.10	36.6791	36.8876	37.7037	44.6281	40.1992	49.5743	111.27	134.402
XLOC_001813	Y105E8A.11	76.9212	97.7691	121.821	98.6825	85.9717	150.494	296.511	335.148
XLOC_001816	Y105E8A.27	38.316	40.7429	7.15382	34.1989	34.662	4.48654	86.2127	73.3474
XLOC_001817	ekl-4	24.1931	24.6803	22.2177	23.58	26.3844	20.6634	71.0911	70.6278
XLOC_001818	zoo-1	10.045	10.3826	13.923	12.075	13.447	12.6418	34.3506	38.1638
XLOC_001819	Y105E8B.14	1.16983	0.246673	0.261445	0.409756	1.04823	0.210483	1.67795	1.66847
XLOC_001820	Y105E8B.7	4.10714	3.73555	8.0735	6.28644	5.15461	10.4713	15.9162	21.9123
XLOC_001821	bath-40	47.0438	48.111	37.3585	47.1666	42.3152	33.4057	132.513	122.887
XLOC_001822	riok-2	63.9862	60.5126	38.9334	57.0749	55.9836	32.9023	163.432	145.961
XLOC_001823	Y105E8B.5	160.798	178.484	104.555	163.953	155.093	143.261	443.837	462.307
XLOC_001824	Y105E8B.6,ero-1	64.4746	67.9627	57.4798	68.6437	70.389	66.8582	189.917	205.891
XLOC_001827	Y54E5A.2	12.7298	11.7078	2.53071	10.1807	9.74192	1.87801	26.9683	21.8006
XLOC_001828	Y54E5A.7	11.318	11.1883	13.2687	11.6972	11.7903	15.1495	35.775	38.637
XLOC_001829	Y54E5A.8	16.1084	16.4956	20.9636	13.7113	14.3672	24.3902	53.5676	52.4687
XLOC_001831	K05C4.8	0.896572	0.473698	1.2287	0.488006	0.432255	0.489435	2.59897	1.4097
XLOC_001832	K05C4.4	1.81298	2.03007	1.01823	1.7606	1.49178	0.706232	4.86128	3.95861
XLOC_001833	K05C4.7	28.8174	28.1363	21.1831	26.1434	26.6881	17.5714	78.1368	70.4029
XLOC_001834	hmp-2	20.2793	22.1919	20.0127	20.0543	19.8623	20.9369	62.4839	60.8535
XLOC_001835	K05C4.5	66.7354	64.9723	38.2316	61.1675	60.1961	34.3103	169.939	155.674
XLOC_001836	dnj-12	209.46	226.597	166.226	204.209	200.697	175.973	602.283	580.879
XLOC_001837	rps-26	3329.04	3489.5	2849.63	3209.53	3112.54	3274.06	9668.17	9596.13
XLOC_001839	uev-1	204.795	189.766	180.116	195.985	213.062	205.437	574.677	614.484
XLOC_001840	F39B2.1,K11B4.1	87.1923	83.5701	111.121	84.5711	84.1391	111.358	281.883	280.068
XLOC_001842	K11B4.2	16.0147	16.271	17.7621	20.7343	15.2753	12.675	50.0478	48.6846
XLOC_001844	smp-1	15.996	12.0872	18.1906	12.103	11.7955	15.9754	46.2738	39.8739
XLOC_001845	let-49	15.2303	15.7844	13.1222	15.2573	15.3202	11.2511	44.1369	41.8286
XLOC_001846	ubc-16	36.5596	34.6864	38.5748	33.6663	40.6009	46.4813	109.821	120.749
XLOC_001847	Y54E5B.5	0	0	0	0	0	0.0925376	0	0.0925376
XLOC_001848	F32A7.1	0.139905	0.145903	0	0	0.135869	0	0.285808	0.135869
XLOC_001849	F32A7.2	0	0	0	0	0	0.142802	0	0.142802
XLOC_001851	F32A7.8	0	0	0.391161	0.307541	0.273704	0	0.391161	0.581245
XLOC_001852	F32A7.4	25.7817	24.0548	20.9358	24.513	26.591	17.0034	70.7723	68.1074
XLOC_001853	F32A7.5	63.4383	69.9164	65.3566	70.1195	65.481	66.9772	198.711	202.578
XLOC_001854	str-245	0	0.529776	0.177238	0.279858	0.123536	0.283043	0.707014	0.686437
XLOC_001855	F11C3.1	0.352387	0.948742	1.04469	0.837998	0.615413	1.30752	2.34582	2.76093
XLOC_001856	unc-122	2.63904	3.18821	2.39829	3.34498	3.36927	3.1202	8.22554	9.83445
XLOC_001858	ptr-23	82.0968	96.1331	10.9829	41.2846	37.4901	9.36619	189.213	88.1409
XLOC_001859	F21F12.1	0	0.25004	1.26992	1.41008	2.1124	1.4094	1.51996	4.93188
XLOC_001860	kin-1	87.0966	88.5445	79.4981	85.4884	82.5295	84.0222	255.139	252.04
XLOC_001861	ZK909.3	298.117	330.44	154.701	257.966	234.35	101.888	783.258	594.204
XLOC_001862	ces-2	0	0	0	0	0	0.124847	0	0.124847
XLOC_001863	ZK909.6	43.8983	36.3678	77.2411	34.6126	30.4841	111.954	157.507	177.051
XLOC_001864	ZK337.2	3.68587	3.64705	5.51693	3.39301	3.95029	5.11696	12.8498	12.4603
XLOC_001866	tep-1	28.9441	31.5989	49.6282	35.7937	36.5124	61.4331	110.171	133.739
XLOC_001867	mtd-1	7.24037	7.6121	7.68674	6.80224	5.24417	12.2313	22.5392	24.2777
XLOC_001868	F33H2.2	19.9312	20.0276	16.3522	20.0393	18.4249	17.3946	56.311	55.8588
XLOC_001869	F33H2.3	34.592	35.0952	57.6281	37.9466	33.0856	54.3816	127.315	125.414
XLOC_001870	F31C3.2	28.3009	29.9115	22.9283	26.1656	24.2381	20.4977	81.1407	70.9014
XLOC_001872	F31C3.5	15.036	11.2989	8.11511	17.6077	13.5215	11.7263	34.45	42.8555
XLOC_001873	rrn-3.56	857.864	751.403	1093.49	733.303	1023.56	1776.81	2702.76	3533.67
XLOC_001874	rrn-1.1	522.959	409.322	598.618	396.013	576.304	887.764	1530.9	1860.08
XLOC_001875	rrn-2.1	5513.89	2552.29	1642.72	1956.75	3272.94	2926.81	9708.9	8156.5
XLOC_001876	rrn-3.1	1113.07	1048.54	1605.34	1029.38	1430.45	2765.08	3766.95	5224.91
XLOC_001877	rrn-1.2	648.064	522.909	752.727	492.114	723.066	1118.1	1923.7	2333.28
XLOC_001878	cTel29B.1	0	0	0	0	71.4684	0	0	71.4684
XLOC_001880	Y74C9A.3	38.7524	34.3739	41.2511	37.758	37.812	45.3043	114.377	120.874
XLOC_001881	Y74C9A.4	21.7778	20.3082	16.1461	17.5135	19.0174	15.2698	58.2321	51.8007
XLOC_001882	sesn-1	27.484	24.9293	26.3192	27.1292	28.6588	27.149	78.7325	82.937
XLOC_001883	Y48G1C.5	10.5829	9.79819	0.610171	8.8793	10.4555	0.578135	20.9913	19.9129
XLOC_001884	Y48G1C.6	3.38889	3.68496	5.13545	3.83322	3.70896	5.08503	12.2093	12.6272
XLOC_001885	Y48G1C.13	10.9481	7.59445	8.34565	2.65309	1.17983	6.5189	26.8882	10.3518
XLOC_001886	Y48G1C.7,Y48G1C.8	25.1936	24.3537	19.7677	23.5108	21.0629	16.4063	69.315	60.98
XLOC_001887	rab-11.1	567.213	618.495	633.607	633.095	627.474	676.72	1819.32	1937.29
XLOC_001891	F53G12.11	0	0.537433	0	0	0	0	0.537433	0
XLOC_001892	bli-3	15.0847	16.1223	12.7311	15.6735	15.0042	15.8236	43.9381	46.5013
XLOC_001893	ptr-11	30.39	33.3524	55.1728	53.8491	54.8691	57.1278	118.915	165.846
XLOC_001895	F56C11.3	15.4939	17.2286	48.5853	18.6252	16.4141	45.2393	81.3078	80.2786
XLOC_001896	Y48G1BM.8	13.2422	11.1154	6.65572	9.06113	10.5009	5.13001	31.0133	24.692
XLOC_001897	Y48G1BL.4	6.1431	5.38122	9.57739	1.22625	5.23673	7.22237	21.1017	13.6853
XLOC_001898	Y48G1BL.5	4.10672	6.24529	2.32595	5.92949	6.72495	2.6747	12.678	15.3291
XLOC_001899	Y48G1BL.6	2.77488	0	1.56429	2.95251	1.13058	2.5646	4.33917	6.64769
XLOC_001900	Y48G1BM.6	0.508736	0.487482	2.45623	0.387204	0.522019	2.62112	3.45245	3.53034
XLOC_001902	Y48G1BM.9,Y48G1BR.1	56.4697	67.8864	28.8214	39.4013	28.9552	30.3281	153.178	98.6846
XLOC_001904	ztf-3	6.68517	5.35149	6.75288	6.64964	5.07997	6.98363	18.7895	18.7132
XLOC_001905	C53D5.5	11.1462	10.668	28.9281	14.3272	15.2464	42.8295	50.7423	72.4031
XLOC_001906	imb-3	214.13	218.772	116.533	172.136	171.639	110.675	549.435	454.45
XLOC_001907	xpo-2	43.7913	42.4377	30.2215	40.3852	36.2291	26.5361	116.451	103.15
XLOC_001908	mbtr-1	6.23533	4.83249	5.92907	5.59477	6.27471	7.00619	16.9969	18.8757
XLOC_001909	R119.1	4.53164	4.07923	3.92514	3.43396	4.96319	3.36345	12.536	11.7606
XLOC_001910	R119.2,R119.3,pqn-59	299.779	313.757	271.206	288.809	283.769	279.35	884.742	851.928
XLOC_001911	R119.5	2.63581	2.94647	5.63175	3.82103	2.67911	6.39134	11.214	12.8915
XLOC_001912	Y50C1A.2	1.78874	1.65677	1.40738	1.60362	2.62484	1.70471	4.85289	5.93317
XLOC_001913	W04C9.5	0.460944	0.576625	0.755998	0.296761	0.618037	0.488705	1.79357	1.4035
XLOC_001914	W04C9.6	0.225334	0.356716	1.00671	0.971491	0.813292	1.16346	1.58876	2.94824
XLOC_001915	Y65B4BL.3	9.04686	9.59761	9.29874	10.09	8.37199	7.14414	27.9432	25.6061
XLOC_001916	Y65B4BL.4	22.3173	18.8224	9.91195	13.951	15.5597	6.89035	51.0516	36.401
XLOC_001917	Y65B4BL.7	5.29786	6.95502	4.06444	5.74511	7.94664	3.84129	16.3173	17.533
XLOC_001918	acs-13	73.6436	75.8462	65.0041	92.1038	86.1647	89.7059	214.494	267.974
XLOC_001919	Y65B4BL.6	130.759	134.422	59.4858	159.153	144.836	34.5676	324.667	338.557
XLOC_001923	ceh-9	0.353233	0	0	0.381511	0.340773	1.16317	0.353233	1.88545
XLOC_001924	grl-16	1834.45	2105.34	409.729	1776.19	1644.26	165.904	4349.52	3586.35
XLOC_001925	F56A6.5	0.187513	0	0	0	0	0.207235	0.187513	0.207235
XLOC_001926	hum-7	7.74086	8.3331	6.81071	7.94842	7.37736	5.20693	22.8847	20.5327
XLOC_001927	F56A6.4	21.6099	19.6037	13.6592	18.0803	19.78	10.0015	54.8728	47.8618
XLOC_001928	Y65B4A.6	59.046	58.5861	46.6743	53.8007	57.4516	48.3337	164.306	159.586
XLOC_001929	Y65B4A.7	6.2237	6.49734	0.816906	5.73111	4.28247	1.26726	13.5379	11.2808
XLOC_001930	Y65B4A.8,Y65B4A.9	32.8589	33.4186	27.21	33.2049	30.6361	28.3973	93.4875	92.2383
XLOC_001931	Y18H1A.14	0	0.0941979	0	0	0.0875138	0.399176	0.0941979	0.48669
XLOC_001932	Y18H1A.10	7.33359	7.86465	1.09426	7.09585	5.59856	0.504815	16.2925	13.1992
XLOC_001933	Y18H1A.2,Y18H1A.4	52.8793	54.2549	67.0859	55.2585	52.5999	70.5106	174.22	178.369
XLOC_001934	Y18H1A.3	13.8716	14.1107	17.0291	14.2215	14.2299	16.5903	45.0114	45.0417
XLOC_001935	Y18H1A.7	11.9571	13.0417	11.2181	8.8837	11.1567	8.47277	36.2169	28.5132
XLOC_001936	Y18H1A.15	7.04954	7.45908	1.61394	6.61277	7.7433	1.02956	16.1226	15.3856
XLOC_001937	col-46	1.63537	1.27368	32.5512	2.24898	2.80309	44.0533	35.4603	49.1054
XLOC_001939	Y18H1A.9	39.4836	43.168	23.4379	34.823	30.473	11.3653	106.09	76.6613
XLOC_001940	mps-3	29.7851	33.7031	3.9723	24.4163	28.0233	3.31184	67.4605	55.7514
XLOC_001947	ZC123.4	6.47624	6.43002	10.1016	7.92575	8.28386	8.33016	23.0079	24.5398
XLOC_001948	pde-6	25.8844	27.9691	25.5845	26.9516	23.2603	39.0807	79.438	89.2926
XLOC_001949	him-19	11.7434	10.2756	5.47165	8.60235	10.9914	4.54135	27.4906	24.1351
XLOC_001950	Y95B8A.12	1.7984	1.78897	2.05182	1.76797	1.10864	2.13168	5.63919	5.00829
XLOC_001953	mig-1	12.6323	12.774	18.6989	13.0691	14.4228	24.1017	44.1052	51.5936
XLOC_001954	cutl-20,shc-1	19.2855	18.5293	19.5773	17.5828	14.9026	23.8937	57.3921	56.3791
XLOC_001957	C54G6.1	10.9308	10.195	10.4007	10.3796	11.8908	6.41957	31.5265	28.69
XLOC_001958	Y34D9A.8	6.08471	11.4746	6.04067	4.32261	6.61659	11.9888	23.6	22.928
XLOC_001959	Y34D9A.1	58.3921	51.9204	59.2141	55.9951	55.0365	66.4613	169.527	177.493
XLOC_001960	spd-1	25.0625	24.8348	16.0454	25.3131	23.2084	12.6347	65.9427	61.1562
XLOC_001961	vps-4	54.7763	51.7756	54.4921	57.5265	51.6801	56.6496	161.044	165.856
XLOC_001962	R06A10.3	0	0	0	0	0	0.297458	0	0.297458
XLOC_001963	R06A10.4	18.0351	18.2043	5.76146	10.4181	7.76965	2.94446	42.0009	21.1322
XLOC_001965	Y48G8AL.10,Y48G8AL.9	7.30217	8.04717	7.68589	6.46503	6.35611	5.0978	23.0352	17.9189
XLOC_001966	aps-3	60.5371	56.107	52.3569	57.4646	63.6011	67.9691	169.001	189.035
XLOC_001968	haf-6	22.4242	22.6921	28.2697	22.6299	22.8269	33.8508	73.386	79.3076
XLOC_001969	Y48G8AL.16	171.125	205.31	42.0304	141.9	145.575	22.4095	418.465	309.885
XLOC_001970	Y48G8AL.12	4327.46	4875.27	619.867	3719.34	3217.8	131.839	9822.6	7068.98
XLOC_001971	Y48G8AL.13	103.765	111.894	54.6808	82.8511	76.0147	70.6142	270.34	229.48
XLOC_001973	grh-1	5.56829	7.79366	28.7788	10.476	10.1056	39.1895	42.1407	59.7711
XLOC_001977	K12C11.1	84.1018	84.2215	97.3807	82.6919	80.2754	133.161	265.704	296.128
XLOC_001978	Y92H12BL.4	12.4373	11.6006	12.2923	10.4134	9.71264	10.2655	36.3302	30.3915
XLOC_001979	Y92H12BM.1	8.71563	6.33697	5.97783	6.70944	7.55081	7.0013	21.0304	21.2615
XLOC_001980	Y92H12BR.2	38.6481	42.7198	37.5263	39.9991	40.8926	34.6428	118.894	115.535
XLOC_001981	Y92H12BR.4	0.217694	1.58569	1.93454	1.10743	1.12125	2.55641	3.73792	4.78509
XLOC_001982	F37F2.2	50.8278	55.2765	47.1115	61.3173	55.936	56.9147	153.216	174.168
XLOC_001984	gst-25	0	0	0.269058	0	0.189066	0	0.269058	0.189066
XLOC_001986	Y92H12A.5	9.77491	9.11531	8.9784	8.97363	10.1553	9.11104	27.8686	28.24
XLOC_001989	cpx-1	12.3037	14.0153	20.0074	12.1887	11.8455	16.8521	46.3264	40.8863
XLOC_001990	Y73E7A.5	0.814583	0.424162	0.859249	0.223478	0	0.459761	2.09799	0.683239
XLOC_001991	Y73E7A.6	38.8801	47.0307	29.6153	47.9637	36.7244	48.839	115.526	133.527
XLOC_001992	bre-4	16.5322	17.9222	14.0681	16.3122	14.3417	13.8574	48.5225	44.5113
XLOC_001993	mab-20	4.0945	3.71825	7.75862	4.9259	4.14739	7.83887	15.5714	16.9122
XLOC_001994	pqn-88	5.18863	2.29024	6.32361	1.39902	3.72651	4.99438	13.8025	10.1199
XLOC_001995	Y71G12B.33	7.28573	6.98222	1.89948	5.59409	5.23225	0.550752	16.1674	11.3771
XLOC_001996	Y71G12B.22	14.9959	12.6729	1.69696	9.5828	10.1315	1.1583	29.3658	20.8726
XLOC_001997	Y71G12B.23	7.44176	9.51403	17.3262	12.7491	12.493	16.7219	34.282	41.964
XLOC_001998	Y71G12B.35	1.84447	2.34692	3.71116	2.23491	2.40836	3.16854	7.90255	7.81181
XLOC_001999	Y71G12B.31	0.702914	0.739791	0.79943	0.376991	0.451325	0.378873	2.24214	1.20719
XLOC_002001	mppa-1	45.5891	45.7886	59.7968	41.9998	41.9163	70.0189	151.174	153.935
XLOC_002002	Y71G12B.25	55.1842	56.2743	146.115	120.486	128.108	121.042	257.573	369.636
XLOC_002003	Y71G12B.26	4.43785	3.16638	2.09405	1.55325	1.19874	0.509598	9.69828	3.26159
XLOC_002004	Y71G12B.27	57.7665	53.7495	4.15228	43.3884	52.7501	2.84563	115.668	98.9841
XLOC_002005	Y71G12B.32	0.170834	0.749067	3.35419	1.10162	0.276177	3.72298	4.27409	5.10078
XLOC_002006	Y71G12B.30	21.5514	22.032	1.9084	18.3747	18.1754	1.92036	45.4918	38.4705
XLOC_002007	C53H9.3	68.4498	73.2132	73.5723	71.1281	75.6031	94.5221	215.235	241.253
XLOC_002010	M01D7.1	0	0	0	0	0	0.26042	0	0.26042
XLOC_002011	scm-1	65.5759	73.481	84.1925	75.7926	75.8318	87.7842	223.249	239.409
XLOC_002012	Y71G12A.4	10.5704	12.0104	2.61404	12.4119	10.4521	2.61167	25.1948	25.4757
XLOC_002013	Y51F10.7	126.467	134.112	234.557	363.685	337.522	513.38	495.136	1214.59
XLOC_002014	Y51F10.10	21.8369	21.8714	25.5608	20.0523	20.1969	24.8946	69.2691	65.1438
XLOC_002016	gap-3	8.9082	8.11319	8.77332	8.40733	8.94061	8.82093	25.7947	26.1689
XLOC_002017	Y20F4.4	11.6515	12.7813	14.8583	13.1518	12.8387	15.0392	39.2911	41.0297
XLOC_002018	Y20F4.8	0.386962	0.607399	1.20263	0.837632	0.655171	1.0734	2.19699	2.5662
XLOC_002019	Y20F4.5	1.5236	1.84415	3.65169	1.83209	1.24554	2.67938	7.01944	5.75701
XLOC_002020	Y37E3.1	14.6063	13.1572	14.4218	12.6866	15.0283	13.7572	42.1853	41.4721
XLOC_002022	rla-1	3431.01	3482.48	2815.26	3306.87	3065.79	3167.46	9728.75	9540.12
XLOC_002023	Y37E3.8	5942.8	6118.56	4726.26	5733.66	5429.55	5490.96	16787.6	16654.2
XLOC_002028	Y37E3.13	1.00633	1.05339	1.48514	1.47471	1.10398	0.697726	3.54486	3.27642
XLOC_002029	Y37E3.19	18.6211	13.2174	1.57462	11.696	15.6027	0.305237	33.4131	27.6039
XLOC_002030	fpn-1.1	38.7619	47.5039	26.7293	35.7002	34.7538	29.1739	112.995	99.6279
XLOC_002031	Y37E3.23	0.158008	0.985797	2.1727	0.679052	0.757019	3.22093	3.3165	4.657
XLOC_002032	W03F11.1	6.21337	0.163026	0	0	0	0	6.3764	0
XLOC_002033	gcy-17	0.0790312	0.0553429	0.0364446	0	0.127109	0.0576394	0.170819	0.184748
XLOC_002034	dct-9	23.5552	23.7798	2.14441	21.3756	22.4727	0.923104	49.4794	44.7714
XLOC_002035	W03F11.4	32.1944	30.4716	7.33164	29.2055	29.6923	3.86825	69.9976	62.7661
XLOC_002037	abt-2	6.09644	6.67382	7.01439	5.13634	4.47764	8.21156	19.7846	17.8255
XLOC_002039	cdk-7	25.1084	24.5168	27.5732	25.9338	24.0786	23.4064	77.1984	73.4188
XLOC_002040	tpxl-1	58.9433	54.2843	32.2924	47.2812	47.3406	31.1727	145.52	125.794
XLOC_002041	icp-1	20.8561	20.8519	19.2261	19.9503	19.5044	19.0488	60.9341	58.5035
XLOC_002042	Y39G10AR.30	35.1097	34.8622	47.9259	0	68.8937	77.0824	117.898	145.976
XLOC_002043	mcm-4	33.6503	33.3698	30.8801	30.2361	31.9924	31.391	97.9002	93.6195
XLOC_002044	Y39G10AR.15	12.1534	10.8594	5.04049	12.3524	9.52198	4.21021	28.0533	26.0846
XLOC_002045	Y39G10AR.16	24.1834	22.2892	2.01622	17.8647	18.4956	1.11155	48.4888	37.4718
XLOC_002048	sydn-1	3.19958	2.20108	2.62326	2.27498	2.03824	3.31112	8.02392	7.62434
XLOC_002049	Y39G10AR.18	21.1579	21.9175	22.6445	18.2114	21.2998	21.8029	65.7199	61.3141
XLOC_002051	F23C8.5,F23C8.6	475.016	493.924	694.976	528.417	484.713	842.921	1663.92	1856.05
XLOC_002052	F23C8.7	11.8722	10.8841	2.19768	8.96751	9.77473	1.57386	24.954	20.3161
XLOC_002053	F23C8.8,F23C8.9	21.6972	18.4815	16.0564	18.0262	19.6878	15.0375	56.2351	52.7515
XLOC_002054	F23C8.10	0	0	0	0	0	0.182474	0	0.182474
XLOC_002055	F23C8.11	0.48117	0.249676	0.1657	0.518273	0.91709	0.261497	0.896546	1.69686
XLOC_002057	inx-19	1.27268	0.774039	1.22489	1.31116	1.3219	0.854854	3.27161	3.48791
XLOC_002058	Y74C10AL.2,abtm-1	90.0384	90.0248	107.978	87.4491	81.4101	114.045	288.041	282.904
XLOC_002059	Y23H5B.7	0	0.244966	0.235642	0	0	0.37551	0.480608	0.37551
XLOC_002061	Y23H5B.8	0	0	10.6698	1.10754	2.37444	14.3253	10.6698	17.8073
XLOC_002063	aat-5	7.37765	6.86025	14.0015	7.1875	7.53142	13.2188	28.2394	27.9377
XLOC_002064	fbp-1	125.811	130.086	208.471	145.57	141.773	256.847	464.368	544.19
XLOC_002065	ptr-12	17.0211	18.7506	12.1345	13.1288	9.42455	13.5131	47.9062	36.0665
XLOC_002067	Y23H5A.11	0	0	155.321	0	0	0	155.321	0
XLOC_002069	cars-1	79.6313	79.1915	74.8227	82.8115	84.4371	72.2867	233.645	239.535
XLOC_002070	-	4.78526	4.39272	3.53847	5.30542	4.67879	4.76767	12.7165	14.7519
XLOC_002071	F40E3.5	16.649	15.3437	4.66638	13.3342	14.0511	4.07048	36.6591	31.4558
XLOC_002074	F32B5.7	9.20228	10.7641	12.732	9.80915	9.51898	13.1907	32.6984	32.5188
XLOC_002076	cpz-1	867.428	1006.92	1118.57	1278.97	1158.98	1204.28	2992.92	3642.23
XLOC_002080	dnj-30	46.1155	45.2559	37.9484	48.7366	43.8834	35.0144	129.32	127.634
XLOC_002081	Y71F9B.6	10.5545	10.3807	9.84276	10.548	9.90426	10.0215	30.778	30.4738
XLOC_002082	Y71F9B.8	9.25264	9.38729	8.98942	8.24278	7.90291	11.3523	27.6294	27.498
XLOC_002083	plk-2	38.4448	34.8412	19.3436	30.8177	29.39	17.1166	92.6296	77.3243
XLOC_002084	Y71F9B.9	7.48306	8.28751	15.0076	13.8262	14.3351	16.6763	30.7782	44.8376
XLOC_002085	sop-3	22.9413	23.1133	18.6654	20.7093	19.8683	17.4481	64.72	58.0257
XLOC_002086	Y71F9B.13	10.594	11.1732	33.557	7.03469	5.97095	39.5206	55.3242	52.5262
XLOC_002087	Y71F9B.14,Y71F9B.15	2.43529	2.50695	0.0918609	2.0348	1.81136	0.100358	5.0341	3.94652
XLOC_002088	W03D8.9	121.281	120.377	18.5472	98.9752	94.6063	8.56441	260.205	202.146
XLOC_002089	W03D8.1	4.23298	4.29453	0.953412	3.40624	4.79671	0.316834	9.48092	8.51978
XLOC_002090	W03D8.2	12.6854	13.7368	5.09795	13.702	14.1267	2.56887	31.5202	30.3976
XLOC_002091	W03D8.3	15.0911	16.6555	8.29857	15.5108	15.9315	7.00257	40.0452	38.4449
XLOC_002092	pop-1	13.2678	13.833	14.9212	13.1255	11.25	13.0475	42.022	37.423
XLOC_002097	W10C8.4	1.7559	0.549258	1.69782	0.759022	0.508858	1.35359	4.00298	2.62147
XLOC_002098	W10C8.5	202.063	219.854	334.715	227.008	222.64	384.16	756.632	833.808
XLOC_002099	W10C8.6	5.41854	2.27248	3.06444	3.58906	1.06122	1.23486	10.7555	5.88514
XLOC_002101	Y71F9AL.12	40.1584	40.8078	30.9867	35.8666	39.7092	33.272	111.953	108.848
XLOC_002102	rpl-1	3267.84	3436.59	2625.61	3203.11	2994.32	2975.25	9330.04	9172.68
XLOC_002105	arx-1,dnc-5	82.4056	82.2695	94.2506	87.0441	79.5603	98.9628	258.926	265.567
XLOC_002106	Y71F9AL.17	130.762	137.422	129	140.545	141.647	144.14	397.184	426.332
XLOC_002107	pme-1	29.8412	28.6257	19.8346	26.1151	26.4462	17.8531	78.3015	70.4144
XLOC_002108	Y71F9AM.8	0	0.94716	0	0	0	0	0.94716	0
XLOC_002109	bam-2	12.4859	12.3575	14.5136	11.4257	11.5576	16.2448	39.357	39.2281
XLOC_002112	Y71F9AR.4	31.9507	28.1751	24.1236	31.0864	31.156	31.2763	84.2494	93.5187
XLOC_002113	Y71F9AR.2,Y71F9AR.3	7.7565	9.78899	10.0055	7.89493	7.96118	9.05706	27.551	24.9132
XLOC_002114	nduf-5	258.908	263.883	338.403	265.565	238.408	383.6	861.194	887.573
XLOC_002115	mek-2	34.4491	36.08	35.4784	29.4768	31.5733	39.4652	106.007	100.515
XLOC_002116	Y54E10BR.5	208.292	208.087	202.078	247.66	231.917	225.916	618.457	705.493
XLOC_002117	rpb-7	98.7738	97.6936	83.2963	107.92	95.3263	81.5245	279.764	284.771
XLOC_002118	mod-5	1.21253	0.952688	2.21912	1.32137	1.09237	2.64736	4.38434	5.0611
XLOC_002119	ztf-23	11.0981	10.4051	9.01105	9.73244	9.29739	8.24164	30.5142	27.2715
XLOC_002120	arx-7	39.7541	39.8661	43.4934	46.8042	42.2049	42.2293	123.114	131.238
XLOC_002121	M01B12.4,riok-1	42.8667	42.3782	29.154	36.172	33.3643	24.5757	114.399	94.112
XLOC_002122	C45E1.5	0	0	0	0.913278	1.63582	0.935661	0	3.48476
XLOC_002123	C45E1.4	9.30827	8.97879	12.9773	7.87092	7.5958	15.0492	31.2644	30.5159
XLOC_002125	K09H9.8	16.3484	12.5194	22.3592	7.53058	7.33481	32.1885	51.227	47.0539
XLOC_002126	K09H9.5	4.65499	4.87599	32.097	6.30987	4.7001	32.6012	41.628	43.6112
XLOC_002127	lpd-6	108.356	115.934	54.1334	99.875	104.13	46.5045	278.423	250.51
XLOC_002128	K09H9.7	16.0783	12.5668	13.5164	15.5939	15.7074	9.46632	42.1615	40.7676
XLOC_002129	vbh-1	131.627	130.363	96.1248	120.436	120.568	87.6888	358.115	328.693
XLOC_002130	Y54E10A.10	92.3958	100.621	47.0739	78.9495	83.0138	44.6025	240.091	206.566
XLOC_002131	Y54E10A.11	25.5276	23.1609	21.4208	22.6548	23.4896	22.872	70.1093	69.0164
XLOC_002132	Y54E10A.12	18.1095	16.5014	10.3421	14.6247	14.6659	6.82439	44.953	36.115
XLOC_002134	rom-5	20.0131	17.0908	24.7239	19.1842	18.1666	27.743	61.8278	65.0938
XLOC_002135	cdt-1	6.09512	6.19949	9.04478	6.9012	6.05713	9.03394	21.3394	21.9923
XLOC_002136	mab-31	54.9647	58.1333	62.8963	54.0866	47.2823	87.4408	175.994	188.81
XLOC_002141	zip-4	22.2872	20.7763	19.4214	17.2844	22.0301	19.8102	62.4849	59.1247
XLOC_002142	pqn-72	25.1696	22.2527	1.46508	4.07934	3.65824	1.30302	48.8874	9.0406
XLOC_002143	W01B11.6	82.3902	66.0605	175.927	71.4115	61.302	257.227	324.378	389.94
XLOC_002144	ace-2	10.0235	9.68158	11.4236	8.40975	8.06161	17.4367	31.1287	33.9081
XLOC_002145	Y44E3A.3	137.178	135.471	151.617	147.682	133.797	184.261	424.266	465.74
XLOC_002146	Y44E3A.4	20.8018	20.023	18.4571	18.9897	18.2885	18.8853	59.2819	56.1635
XLOC_002147	Y44E3A.6	20.6226	21.6967	23.2976	21.2359	19.5937	24.0699	65.6169	64.8995
XLOC_002148	W05F2.2	2.88814	3.07513	2.89638	3.02416	2.82334	2.28819	8.85965	8.13569
XLOC_002149	W05F2.3	36.6394	35.5832	6.28555	21.9739	21.1826	4.69757	78.5082	47.8541
XLOC_002150	W05F2.4	29.9226	33.2664	30.105	34.1152	32.1093	22.8482	93.294	89.0727
XLOC_002151	2015-09-01	31.0748	29.1029	18.4906	27.5142	29.8185	15.8129	78.6683	73.1456
XLOC_002152	Y47G6A.13	16.1689	16.3752	2.65447	15.7185	16.6809	1.06576	35.1986	33.4652
XLOC_002153	Y47G6A.14	11.0124	12.3057	13.1139	11.7053	8.7321	10.4852	36.432	30.9226
XLOC_002154	Y47G6A.15	1164.65	1189.41	1219.33	1572.2	1583.15	776.476	3573.39	3931.83
XLOC_002155	Y47G6A.17	0.269062	0.123754	0.186474	0.241541	0.272529	0.181805	0.57929	0.695875
XLOC_002156	Y47G6A.18	51.067	56.7176	72.7542	66.9163	66.746	73.324	180.539	206.986
XLOC_002157	Y47G6A.19	144.262	152.721	31.6745	103.09	100.947	21.1824	328.658	225.219
XLOC_002158	Y47G6A.30	0.593612	1.234	0.406286	0.63201	0.543878	0	2.2339	1.17589
XLOC_002159	Y47G6A.21,rnp-6	86.4764	92.2832	94.7632	79.3674	74.7316	114.015	273.523	268.114
XLOC_002160	Y47G6A.22	89.4893	92.0159	167.25	86.5067	83.9522	222.84	348.755	393.299
XLOC_002161	Y47G6A.29,lpd-3	16.1828	16.8537	14.8582	16.0269	17.7515	15.565	47.8947	49.3434
XLOC_002163	mis-12	21.2501	19.7915	25.3616	22.9839	22.7991	27.4649	66.4032	73.2479
XLOC_002164	Y47G6A.25	17.7651	13.641	10.074	12.3288	13.5651	6.21303	41.4801	32.1069
XLOC_002165	Y47G6A.26	42.7774	34.8377	4.98996	36.3917	34.8904	1.23274	82.6051	72.5148
XLOC_002166	jmjc-1	16.6848	18.9155	19.6857	18.6882	20.3586	25.4701	55.286	64.5169
XLOC_002168	ccb-1	10.8392	13.058	15.9148	11.7017	12.7178	13.0783	39.812	37.4978
XLOC_002169	col-50	0	0.084439	0	0.0813267	0.0724416	0	0.084439	0.153768
XLOC_002170	T28F2.7	9.11315	9.2843	5.09438	8.70283	9.87403	5.50616	23.4918	24.083
XLOC_002171	smp-2	32.0499	34.5013	37.4627	32.5807	30.2655	54.8133	104.014	117.659
XLOC_002172	ftn-2	668.35	849.683	535.356	925.3	915.171	877.006	2053.39	2717.48
XLOC_002173	rab-8	59.0011	56.6457	59.0828	56.4874	49.9482	60.7471	174.73	167.183
XLOC_002174	D1037.5	14.9732	15.0882	2.31753	12.7838	12.2469	1.24115	32.3789	26.2719
XLOC_002175	msh-2	29.8478	27.6633	24.8715	27.1311	30.3194	20.939	82.3826	78.3895
XLOC_002177	F21A9.2	3.80217	2.33703	1.66085	3.25529	2.73673	3.16526	7.80005	9.15728
XLOC_002178	lin-59	14.2778	16.4369	16.9617	16.1981	14.587	22.0489	47.6764	52.834
XLOC_002179	larp-5	73.248	76.4102	61.5268	82.1021	79.3085	61.6644	211.185	223.075
XLOC_002181	inx-13	70.7521	75.1947	115.304	75.0193	66.6373	125.523	261.251	267.18
XLOC_002182	inx-12	83.1913	88.7311	116.187	82.3705	82.1886	140.184	288.109	304.743
XLOC_002184	ric-19	6.30325	5.2304	9.79495	7.80764	5.85428	11.2277	21.3286	24.8896
XLOC_002185	ptr-2	38.3029	39.924	29.3821	44.8974	43.7082	25.3031	107.609	113.909
XLOC_002186	C32E8.9,unc-11	48.7469	45.6203	69.0576	47.0505	39.9828	76.3382	163.425	163.371
XLOC_002187	C32E8.11	28.573	28.0308	28.1553	29.5374	28.9288	28.5086	84.7591	86.9748
XLOC_002189	F53F10.1	14.7802	14.6465	18.945	19.0661	15.5664	11.2776	48.3717	45.9101
XLOC_002190	T03F1.6,gsp-4	96.4277	95.7307	13.0656	75.2675	74.6218	6.37348	205.224	156.263
XLOC_002191	T03F1.7	12.6455	11.1173	12.0787	9.52316	8.32653	10.3879	35.8415	28.2376
XLOC_002192	T03F1.8,hcp-4	83.5312	79.656	75.6439	74.2459	76.6423	78.4835	238.831	229.372
XLOC_002193	clec-53	13.6912	13.6316	13.3383	15.5056	10.282	16.4722	40.6611	42.2598
XLOC_002194	T03F1.12	18.879	16.9793	21.375	17.6636	19.9143	24.9583	57.2333	62.5362
XLOC_002195	abf-2	1.97764	2.44265	13.1849	9.7662	11.4537	6.80664	17.6052	28.0265
XLOC_002196	abf-1	2.12468	0	0	0	0	2.28539	2.12468	2.28539
XLOC_002197	C50F2.4	26.1666	28.6507	40.1505	31.7553	32.7485	44.1807	94.9678	108.684
XLOC_002199	C50F2.5	37.3639	31.0654	11.6909	32.6826	34.2335	8.37346	80.1202	75.2896
XLOC_002200	fkb-5	155.898	158.529	910.113	296.962	310.571	1082.52	1224.54	1690.05
XLOC_002201	C50F2.7,C50F2.8	6.25313	7.83093	7.22795	3.33653	4.98207	4.28823	21.312	12.6068
XLOC_002202	T20F5.3	36.2992	35.6482	26.25	34.537	29.0074	30.8566	98.1974	94.401
XLOC_002203	T20F5.8	0.297352	0.31058	0.407499	0.644841	0.286628	0	1.01543	0.931469
XLOC_002204	T20F5.4	1.86648	2.09491	14.6028	3.2862	3.35981	22.2915	18.5642	28.9375
XLOC_002205	T20F5.5,T20F5.6	44.2358	41.4549	21.9046	40.0795	34.4759	19.3017	107.595	93.8571
XLOC_002206	T20F5.7	42.3285	44.9939	30.7086	41.046	42.4205	24.9747	118.031	108.441
XLOC_002207	lrp-2	5.75475	5.05828	6.59966	4.42803	4.82589	7.29254	17.4127	16.5465
XLOC_002208	F47B3.5	16.1088	16.3102	3.03527	10.4906	16.5538	1.27054	35.4543	28.3149
XLOC_002209	F47B3.6	16.2677	14.2371	5.71913	15.7475	15.5712	3.69285	36.2239	35.0115
XLOC_002210	F47B3.7	22.4263	20.2228	1.77036	14.2438	14.4954	0.519678	44.4195	29.2589
XLOC_002211	F28H1.4	48.9545	54.4321	25.8532	31.4913	34.0507	18.4487	129.24	83.9907
XLOC_002212	F28H1.5	13.993	14.3709	3.1387	15.1718	12.103	0.879756	31.5026	28.1546
XLOC_002213	unc-73	26.5415	27.0563	27.483	28.623	28.0764	23.9987	81.0808	80.6981
XLOC_002217	clec-89	2.28559	2.81456	2.78535	2.82982	3.59609	2.33638	7.8855	8.76229
XLOC_002218	E01A2.4	50.1848	51.9976	36.8728	45.4643	48.3869	32.0552	139.055	125.906
XLOC_002219	E01A2.5	20.7329	20.5642	20.6202	20.8348	21.1328	17.534	61.9173	59.5016
XLOC_002220	E01A2.6	87.9671	75.5102	60.8198	71.3896	74.4323	54.8149	224.297	200.637
XLOC_002222	E01A2.7	3.51527	4.21919	6.57189	5.6116	7.10516	7.26116	14.3064	19.9779
XLOC_002223	E01A2.10	10.1042	8.46679	15.8239	9.80667	12.0411	20.2932	34.3949	42.141
XLOC_002224	E01A2.8	0.347577	0	0	0	0	0	0.347577	0
XLOC_002225	R12E2.15	3672.79	4048.71	607.552	3931.98	3517.19	179.133	8329.05	7628.3
XLOC_002226	R12E2.6	72.8787	64.7017	12.8369	66.1687	50.1429	1.78141	150.417	118.093
XLOC_002227	R12E2.7	2028.37	2294.57	187.415	1332.78	1171.17	60.8691	4510.36	2564.82
XLOC_002228	R12E2.8	0.968371	1.0165	1.56716	2.63507	2.65045	1.4197	3.55203	6.70522
XLOC_002229	inx-15	99.1929	102.006	79.2065	103.255	90.3586	112.075	280.405	305.689
XLOC_002230	egg-5	20.1059	20.1051	3.36526	12.2098	14.4268	1.91557	43.5763	28.5522
XLOC_002232	R12E2.11	89.6492	96.6647	96.5776	84.6844	91.4525	106.963	282.892	283.1
XLOC_002233	R12E2.12	77.168	78.1398	83.0837	77.5285	76.8308	93.6193	238.391	247.979
XLOC_002234	R12E2.13	135.964	146.454	144.229	157.912	145.965	164.838	426.647	468.715
XLOC_002235	hop-1	11.1997	9.84367	6.34533	8.72915	9.92862	6.42854	27.3887	25.0863
XLOC_002237	C18E3.9	22.1486	16.6162	12.2464	16.8223	15.3984	12.0151	51.0112	44.2358
XLOC_002238	ndx-7	28.3069	26.3185	46.7281	27.2453	26.9749	51.9844	101.353	106.205
XLOC_002239	exoc-7	18.0797	18.2748	21.6563	19.731	19.4853	27.154	58.0108	66.3703
XLOC_002240	C43E11.9	132.23	132.193	54.6835	109.342	117.262	59.247	319.106	285.851
XLOC_002241	cdc-6	25.6181	24.556	17.2798	23.4364	22.0295	17.0836	67.4539	62.5495
XLOC_002242	Y47D9A.4	9.00989	6.6901	1.78923	7.07731	4.33548	1.46287	17.4892	12.8757
XLOC_002243	Y47D9A.5	4.94803	4.97462	0.307609	4.42687	4.79506	0.492862	10.2303	9.71479
XLOC_002248	ZK973.16	14.9074	0	41.0143	13.1504	0	36.158	55.9217	49.3084
XLOC_002249	ZK973.13	0	0	0	11.096	28.3989	0	0	39.4949
XLOC_002250	ZK973.18	74.3047	0	41.0143	36.682	0	14.9232	115.319	51.6052
XLOC_002252	ZK973.22	179.012	0	0	40.7036	0	0	179.012	40.7036
XLOC_002253	ZK973.20	22.3172	0	0	18.537	36.979	0	22.3172	55.516
XLOC_002254	ZK973.21	27.2264	0	0	31.2939	0	0	27.2264	31.2939
XLOC_002258	ZK973.8	15.9913	16.6077	4.12295	13.7524	14.2369	2.45861	36.722	30.4479
XLOC_002259	ZK973.9	18.5686	15.9839	15.121	15.0103	16.2265	13.3153	49.6735	44.5521
XLOC_002260	lpd-5	272.67	260.229	319.434	268.723	262.708	370.695	852.333	902.126
XLOC_002261	ZK973.11	21.58	20.9931	23.7987	19.7108	20.0248	22.395	66.3718	62.1306
XLOC_002263	T21E12.5	9.50614	8.61065	2.21722	8.82381	11.0687	0.754557	20.334	20.6471
XLOC_002264	C41D11.3,C41D11.4	18.2197	20.2798	18.3071	16.2268	18.1771	16.8052	56.8066	51.2091
XLOC_002265	cps-6	53.5917	52.4671	101.603	55.6823	50.5193	104.355	207.662	210.557
XLOC_002266	C41D11.5,C41D11.9	22.5122	24.2659	19.6465	21.4578	20.4393	17.3494	66.4246	59.2465
XLOC_002267	C41D11.6,eri-7	9.18729	6.56429	6.981	6.24005	7.75227	5.77287	22.7326	19.7652
XLOC_002271	Y119C1B.4	50.6493	49.7877	64.9755	45.6129	44.1989	68.9248	165.412	158.737
XLOC_002272	Y119C1B.5	20.8841	21.04	35.1968	28.2483	23.6379	54.9317	77.1209	106.818
XLOC_002273	Y119C1B.6	21.071	6.21832	24.5217	16.5884	14.5475	3.31916	51.811	34.4551
XLOC_002274	bet-1	24.9115	25.194	23.0808	22.2262	24.2531	25.4317	73.1863	71.911
XLOC_002275	Y119C1B.9	51.2333	51.7655	29.3368	53.6894	48.2867	25.2788	132.336	127.255
XLOC_002276	Y119C1B.11	0	2.65465	0	0	0	0	2.65465	0
XLOC_002277	Y119C1B.10	6.03826	5.27834	6.23056	6.11212	6.30704	10.5535	17.5472	22.9727
XLOC_002278	ceh-17	0.199683	0.420195	1.37731	0.650106	0.192585	0	1.99719	0.842691
XLOC_002280	D1007.3	1.07981	0.451236	0.594982	0.117519	0.310668	0.350855	2.12603	0.779042
XLOC_002281	D1007.18	11.153	13.0998	7.58847	8.15395	10.2247	5.49468	31.8413	23.8733
XLOC_002282	D1007.4	13.3662	9.88283	12.4819	16.3206	14.1836	12.0072	35.7309	42.5114
XLOC_002283	D1007.5	19.9126	21.3645	23.0058	18.7661	19.6419	23.7223	64.2829	62.1303
XLOC_002284	rps-10	2927.71	3166.94	2481.14	2982.22	2805.08	2798.63	8575.79	8585.93
XLOC_002286	D1007.19	0.581981	1.52482	2.82665	1.26702	1.11966	2.54174	4.93345	4.92842
XLOC_002287	nrd-1	20.3201	20.3317	19.7007	17.8791	21.3749	18.2492	60.3525	57.5032
XLOC_002288	C44E4.1,C44E4.2,C44E4.7	33.6407	35.8287	32.4049	35.8545	36.6307	31.3468	101.874	103.832
XLOC_002289	acbp-1	791.123	831.749	807.699	909.535	828.166	1102.05	2430.57	2839.75
XLOC_002290	C44E4.3	93.2574	92.9571	70.6583	80.6968	87.6499	51.0988	256.873	219.445
XLOC_002291	Y119C1A.1	23.5023	21.5174	24.2685	24.0882	22.3999	20.9109	69.2882	67.399
XLOC_002292	rpl-4	3248.22	3481.13	2657.45	3124.32	2938.64	2974.25	9386.8	9037.21
XLOC_002294	B0041.5	55.3636	54.051	40.8057	61.5317	52.3668	44.6607	150.22	158.559
XLOC_002295	ptps-1	53.685	38.218	39.1204	42.4411	44.8673	41.4184	131.023	128.727
XLOC_002296	-	2.54585	1.92271	5.08153	2.71273	2.90802	3.31295	9.55009	8.9337
XLOC_002297	xnp-1	29.3216	27.8836	33.6106	31.4982	31.929	31.613	90.8158	95.0402
XLOC_002299	tag-192	7.30327	7.45815	11.3115	7.8823	7.75582	13.4765	26.0729	29.1146
XLOC_002300	gsp-3	140.873	128.723	20.7051	112.725	111.539	11.5067	290.301	235.771
XLOC_002301	W09C3.7	54.5656	49.8681	8.19668	38.3351	44.0735	5.24642	112.63	87.655
XLOC_002302	W09C3.8	4.43425	4.36423	0.321362	3.39396	3.81909	0.383694	9.11984	7.59674
XLOC_002303	C10H11.8,let-502	36.0969	35.3879	30.7971	34.7523	34.9161	27.6904	102.282	97.3588
XLOC_002305	kca-1	31.7985	30.3898	7.02042	20.3743	19.3459	4.01762	69.2087	43.7378
XLOC_002306	M04F3.6	16.5387	14.2458	2.52178	6.94927	8.11558	2.6315	33.3063	17.6963
XLOC_002307	M04F3.3	20.6088	20.2566	15.1466	23.1972	22.6387	14.8822	56.012	60.7181
XLOC_002308	-	38.3873	23.0886	41.871	48.5043	39.7208	45.6181	103.347	133.843
XLOC_002309	M04F3.4	90.4886	85.6356	69.4622	84.9954	72.5451	78.1487	245.586	235.689
XLOC_002310	M04F3.5	13.123	13.5572	17.5015	14.2033	13.9993	15.2449	44.1817	43.4475
XLOC_002312	zig-7	113.596	115.224	114.433	118.618	108.133	113.831	343.253	340.582
XLOC_002313	F57C9.7	12.0187	12.7275	8.33161	13.0978	10.6806	6.57294	33.0778	30.3513
XLOC_002314	rga-6	0.96018	0.974109	1.44125	0.742273	0.718889	0.934627	3.37554	2.39579
XLOC_002319	glc-2	6.27307	2.45809	6.62304	3.31507	3.55933	4.63139	15.3542	11.5058
XLOC_002321	unc-38	2.78215	2.59779	4.54136	3.70381	3.37568	3.83954	9.9213	10.919
XLOC_002322	F21F3.6	161.756	168.163	138.917	143.6	134.335	140.364	468.836	418.299
XLOC_002323	imb-1	24.9682	25.0812	21.7849	22.3515	24.1261	21.0695	71.8343	67.5471
XLOC_002324	F28B3.10	106.794	111.205	136.485	107.584	114.395	164.798	354.484	386.777
XLOC_002325	F28B3.6,him-1	106.633	103.804	99.4733	98.135	96.4819	133.198	309.91	327.815
XLOC_002326	W03G9.8	26.5459	24.2195	22.928	31.8867	31.0924	21.2502	73.6934	84.2293
XLOC_002327	app-1	86.5002	95.4357	80.415	90.6996	92.1018	98.396	262.351	281.197
XLOC_002328	W03G9.5	5.5192	4.57545	1.1259	3.77651	5.29801	0.225086	11.2205	9.29961
XLOC_002330	paf-1	7.33389	6.83767	0.590909	5.28506	6.06606	0.282464	14.7625	11.6336
XLOC_002331	W03G9.7	0.284075	0.524052	0.865122	0.612286	0.542211	0.379092	1.67325	1.53359
XLOC_002332	dyf-1	1.38652	1.04481	1.64689	1.14711	1.06352	1.58643	4.07822	3.79706
XLOC_002333	F54C1.8	15.5967	21.5269	1.14151	17.1983	15.6072	0.680569	38.2651	33.4861
XLOC_002334	F54C1.6	0.548901	0.720467	0.760611	0.298787	0.798848	0.455207	2.02998	1.55284
XLOC_002335	pat-10	3359.32	3532.85	3757.13	3530.78	3225.97	4125.07	10649.3	10881.8
XLOC_002336	C46H11.7	21.6167	29.6294	13.5991	35.3622	31.9438	2.33915	64.8452	69.6452
XLOC_002337	phat-1	22.5671	23.2738	20.9887	30.141	25.997	6.29286	66.8296	62.4309
XLOC_002338	phat-2	61.6361	72.2187	37.2078	58.572	59.3945	9.77909	171.063	127.746
XLOC_002339	C46H11.10	2.57484	2.48541	2.71854	2.56241	3.88223	2.51407	7.77879	8.95871
XLOC_002340	fhod-1	19.4841	20.1106	12.8838	18.1321	17.2046	11.6664	52.4785	47.0031
XLOC_002341	vha-16	371.69	372.432	374.403	367.576	358.261	451.121	1118.53	1176.96
XLOC_002343	tag-300	16.6151	17.6204	9.91505	18.1927	17.5055	6.30263	44.1506	42.0008
XLOC_002344	chp-1	69.2529	65.5034	53.4733	58.4981	66.9514	50.0267	188.23	175.476
XLOC_002345	pas-3	321.755	337.292	275.553	327.535	306	299.237	934.6	932.772
XLOC_002346	Y110A7A.15,Y110A7A.21	52.8422	49.6292	54.0284	46.0139	50.8479	47.9614	156.5	144.823
XLOC_002348	elpc-1	30.0708	27.8685	16.924	26.3812	27.1155	15.1995	74.8633	68.6962
XLOC_002349	mat-1	52.069	49.5766	39.2886	52.9998	47.3808	42.6668	140.934	143.047
XLOC_002350	ppw-2	77.289	71.5305	69.1538	72.0192	74.9296	49.3708	217.973	196.32
XLOC_002351	Y110A7A.19	60.4154	56.5246	60.1648	52.5135	49.8495	64.4636	177.105	166.827
XLOC_002352	spd-5	67.003	64.0806	51.262	61.1262	61.274	43.3859	182.346	165.786
XLOC_002354	osr-1	2.14073	3.12964	50.9241	6.18827	7.64008	59.2359	56.1945	73.0643
XLOC_002355	sem-2	41.1085	45.1374	11.5926	31.6247	26.9245	9.39142	97.8385	67.9406
XLOC_002356	C32E12.4	10.4723	11.3142	12.9289	12.9699	12.6588	10.6553	34.7154	36.284
XLOC_002357	B0261.5	8.5687	10.106	0.826489	10.7941	9.70258	0.221969	19.5012	20.7186
XLOC_002358	B0261.6	114.75	101.082	7.41115	74.2437	83.4516	3.0323	223.243	160.728
XLOC_002359	B0261.7	68.4562	61.599	36.4731	54.16	56.1972	23.0922	166.528	133.449
XLOC_002360	B0261.8	28.9099	31.6262	63.9818	44.8927	43.9535	63.7443	124.518	152.59
XLOC_002361	C01G8.1	32.2994	28.25	3.25915	18.4411	16.2774	3.21822	63.8085	37.9367
XLOC_002362	cln-3.2	9.31135	8.86784	14.8498	10.7793	8.49317	19.3251	33.029	38.5976
XLOC_002363	dhs-1	31.8206	31.546	33.3124	32.0701	31.2005	35.3069	96.679	98.5775
XLOC_002364	dnj-4	15.3751	12.2322	20.5473	13.6516	17.2614	21.1849	48.1546	52.0979
XLOC_002365	erm-1	235.051	243.797	216.908	233.105	221.488	262.521	695.756	717.114
XLOC_002366	C01G8.6	68.0336	70.9433	66.0466	66.2455	70.3072	50.5669	205.024	187.12
XLOC_002367	F48C1.4,let-526	30.2476	30.4659	30.951	30.6273	29.0019	32.0085	91.6645	91.6377
XLOC_002369	F48C1.5	22.0148	16.6107	14.7233	14.0829	23.3114	12.3281	53.3488	49.7224
XLOC_002370	F48C1.6	49.8105	52.4227	56.8394	50.8697	50.3891	66.7542	159.073	168.013
XLOC_002371	spe-11	77.1822	72.1006	6.77215	55.4121	60.6275	2.52755	156.055	118.567
XLOC_002372	F48C1.9	0	0	0	0.936633	0	0	0	0.936633
XLOC_002373	F48C1.11	0.238996	0	0	0	0.233111	0	0.238996	0.233111
XLOC_002374	F48C1.8	0	0	0.249907	0	0	1.01203	0.249907	1.01203
XLOC_002375	apm-1	60.511	65.0339	58.6152	67.9783	66.2677	60.7955	184.16	195.042
XLOC_002377	F55A12.8	53.0476	50.2953	32.8788	48.7851	47.3422	30.0128	136.222	126.14
XLOC_002381	F55A12.10	18.7932	13.7651	13.56	15.3708	14.68	9.2005	46.1183	39.2513
XLOC_002382	pqn-44	89.6393	94.1776	52.1462	78.7096	73.2319	56.7368	235.963	208.678
XLOC_002386	frm-4	35.5131	34.7563	37.9169	33.0694	32.7547	33.5811	108.186	99.4052
XLOC_002387	coq-1	30.1459	30.4529	56.8634	26.2133	25.2266	63.0269	117.462	114.467
XLOC_002388	C30H7.2	69.2832	65.653	66.9098	65.5669	63.6325	70.0321	201.846	199.231
XLOC_002389	F27C1.6	52.8596	50.9522	35.0543	47.1541	50.3137	36.9818	138.866	134.45
XLOC_002390	atp-3	697.839	747.206	912.046	732.198	688.762	978.457	2357.09	2399.42
XLOC_002392	dpy-5	2052.92	2402.36	2186.36	2977.89	2903.55	1772.76	6641.64	7654.2
XLOC_002393	F27C1.10,F27C1.11,F27C1.13	1.01019	1.08097	0.735753	0.526813	0.804638	1.12394	2.82691	2.45539
XLOC_002394	ferl-1	1.54447	1.26864	2.10414	1.48569	1.80684	1.7528	4.91725	5.04533
XLOC_002396	hil-8	0.957834	0.577621	1.10884	0.429524	0.536455	1.14459	2.6443	2.11057
XLOC_002397	T05E8.3	29.984	30.7219	21.4918	25.9021	28.2018	18.7227	82.1977	72.8266
XLOC_002398	C09D4.4	30.2294	28.0064	28.5005	27.616	28.7168	26.7093	86.7363	83.0421
XLOC_002399	rpl-19	3698.16	3944.06	3148.49	3452.76	3217.76	3372.92	10790.7	10043.4
XLOC_002401	-	53.5956	60.8495	10.8374	44.6883	48.8351	8.39888	125.282	101.922
XLOC_002403	F59A3.3	37.5572	36.9412	36.0559	32.4441	29.861	40.3377	110.554	102.643
XLOC_002404	F59A3.4,rpa-3,rpa-4	54.0068	49.671	59.5534	51.6861	57.4606	58.4269	163.231	167.574
XLOC_002405	F59A3.7	2.25734	3.32216	3.85878	2.5069	1.91099	3.34875	9.43828	7.76664
XLOC_002407	F59A3.8	13.7024	12.5489	3.07536	11.692	12.9375	1.67374	29.3267	26.3032
XLOC_002408	pup-3	0.346492	0.286217	0.666	0.0746092	0.463022	0.527851	1.29871	1.06548
XLOC_002411	ostd-1	188.658	195.568	191.165	208.307	198.221	224.801	575.391	631.329
XLOC_002413	pqn-52	281.743	298.373	152.06	223.901	202.834	177.648	732.176	604.383
XLOC_002414	cey-3	304.244	302.359	124.582	251.923	250.4	83.0711	731.185	585.394
XLOC_002415	klp-15	27.9816	25.725	8.78012	21.5466	20.2296	8.25157	62.4867	50.0278
XLOC_002416	F46F11.11,tag-163,tag-83	56.927	59.0266	62.0328	66.435	64.8851	54.5229	177.986	185.843
XLOC_002419	ubl-5	88.5195	82.244	95.0037	104.981	101.009	100.683	265.767	306.673
XLOC_002420	vha-10	799.976	813.104	869.809	846.284	793.121	1106.91	2482.89	2746.32
XLOC_002421	F46F11.9	21.3921	19.9875	17.0372	19.0079	19.9038	22.6622	58.4168	61.5739
XLOC_002423	F46F11.6	43.3295	40.7187	36.353	38.7138	36.4658	31.2887	120.401	106.468
XLOC_002424	F46F11.10	7.52948	5.98412	9.11003	6.73952	6.19105	7.28778	22.6236	20.2184
XLOC_002425	F46F11.8	15.7006	13.9717	7.79952	14.6597	15.7549	8.13464	37.4718	38.5492
XLOC_002426	F55F8.2	51.5557	49.9996	31.1856	48.528	49.6652	29.9607	132.741	128.154
XLOC_002427	F55F8.3	47.4029	46.8794	27.5526	44.2213	44.5891	27.8656	121.835	116.676
XLOC_002428	cir-1	43.3266	39.9324	44.0523	39.5019	42.8175	38.5029	127.311	120.822
XLOC_002429	mff-2,tag-345	82.8131	91.0921	51.7599	78.0518	78.8897	50.6524	225.665	207.594
XLOC_002430	F55F8.7	24.1165	21.5473	6.82729	22.5949	20.7933	3.70111	52.4911	47.0893
XLOC_002431	F55F8.8	3.19298	3.68533	0.658311	2.76879	1.84426	0.174909	7.53662	4.78796
XLOC_002432	F55F8.9	33.383	34.179	19.9889	28.8635	26.7431	20.9269	87.5509	76.5335
XLOC_002433	unc-40	19.2255	18.6029	18.4566	18.16	19.4289	18.5453	56.285	56.1342
XLOC_002437	lim-7	1.44147	2.14278	2.04571	0.765992	3.01698	2.13307	5.62996	5.91604
XLOC_002438	C04F1.1,F56H1.3	10.0539	8.66519	28.4539	17.7925	24.2193	20.349	47.173	62.3608
XLOC_002439	rpt-5	182.889	197.021	154.317	183.63	186.488	154.044	534.227	524.162
XLOC_002440	ccpp-1	22.5167	23.5566	23.0879	24.0131	24.2366	23.1469	69.1612	71.3966
XLOC_002441	F56H1.7	120.293	107.67	129.901	115.191	114.043	148.515	357.864	377.749
XLOC_002446	cpb-3	50.2492	46.1498	27.3594	43.1469	45.4647	19.4908	123.758	108.102
XLOC_002447	glh-3	15.9417	14.9493	10.5518	12.6796	13.5137	8.1521	41.4428	34.3454
XLOC_002448	mtk-1	12.9331	12.6205	15.5149	12.2526	13.7967	17.1144	41.0685	43.1637
XLOC_002449	vps-51	18.3991	16.6322	21.2563	18.0649	19.9442	21.2159	56.2876	59.225
XLOC_002450	C32F10.4	26.1434	24.3187	25.9237	28.1755	28.4925	30.9712	76.3858	87.6392
XLOC_002451	hmg-3	50.7095	47.3475	36.4729	46.1422	47.0944	25.4531	134.53	118.69
XLOC_002452	nhr-2	0.0622987	0.261323	0.42909	0.20347	0.300671	0.135776	0.752712	0.639917
XLOC_002453	C32F10.8	180.167	185.01	193.5	173.335	171.7	206.155	558.677	551.19
XLOC_002454	F33D11.5	0.176575	0.361639	0.248234	0.287613	0.255188	0.198906	0.786448	0.741707
XLOC_002457	F33D11.7	18.4623	16.8845	2.14569	13.2165	14.5278	1.0269	37.4925	28.7712
XLOC_002458	F33D11.8	15.6247	28.977	15.3112	11.8857	13.618	4.34198	59.9129	29.8457
XLOC_002460	F33D11.12,F33D11.9	61.6271	61.1865	71.0722	68.2562	68.6121	82.6878	193.886	219.556
XLOC_002461	F33D11.10	94.1776	91.8083	82.7588	93.9825	94.5841	78.7047	268.745	267.271
XLOC_002462	vpr-1	176.776	185.911	150.128	173.919	175.488	152.851	512.815	502.258
XLOC_002464	noah-1	8.99046	11.433	278.531	26.9625	27.4821	414.904	298.954	469.349
XLOC_002466	stam-1	63.9533	64.9891	54.5377	66.184	64.7016	47.9786	183.48	178.864
XLOC_002469	B0207.6	20.9393	17.4642	18.5166	20.2609	18.9233	12.8696	56.9201	52.0538
XLOC_002470	B0207.7	24.008	23.0783	5.21615	22.6952	22.9045	3.08842	52.3024	48.6881
XLOC_002473	B0207.9	26.1259	30.5566	3.88535	19.4894	23.4833	1.33304	60.5679	44.3057
XLOC_002474	B0207.10	4.57461	3.56471	6.22748	3.77168	5.55046	3.80175	14.3668	13.1239
XLOC_002475	B0207.11	12.6344	7.98493	0.940312	6.4247	8.81732	1.05626	21.5596	16.2983
XLOC_002476	avr-14	6.44399	7.49736	12.4418	9.54484	9.14361	8.64061	26.3832	27.3291
XLOC_002477	C06A5.10,C06A5.4,C06A5.5,C06A5.6	26.5356	28.2831	14.0345	24.1664	25.382	9.50627	68.8532	59.0547
XLOC_002478	unc-94	36.5642	35.6372	42.8848	32.3241	37.0756	40.7367	115.086	110.136
XLOC_002479	C06A5.12	5.16667	1.54609	9.73922	5.22068	5.34098	7.38794	16.452	17.9496
XLOC_002480	C06A5.8	8.94992	8.90075	6.277	5.16834	6.26097	4.18878	24.1277	15.6181
XLOC_002481	rnf-1	17.2153	15.5279	14.3152	16.7943	15.4653	11.3521	47.0584	43.6117
XLOC_002482	B0025.5	108.822	89.6895	6.85274	74.6741	79.1792	6.03261	205.364	159.886
XLOC_002484	ceh-2	1.57895	1.18455	1.58553	1.23727	2.20537	1.43387	4.34903	4.87651
XLOC_002486	C27A12.6	15.6732	15.1571	17.1776	11.8627	14.1731	13.2107	48.0079	39.2465
XLOC_002487	C27A12.7,ari-1	56.7884	52.5294	46.3499	53.939	54.9733	42.9041	155.668	151.816
XLOC_002488	C27A12.9	11.1551	9.26423	11.758	10.8895	10.273	10.0194	32.1773	31.1819
XLOC_002489	ZK484.3,ZK484.4	54.5622	58.3448	50.7896	57.5756	56.8508	52.2288	163.697	166.655
XLOC_002492	ZK484.5	957.586	914.017	77.3182	695.905	667.676	42.0076	1948.92	1405.59
XLOC_002493	ZK484.6	14.9268	19.3661	2.54753	15.7517	15.019	1.63339	36.8404	32.4041
XLOC_002494	ZK484.7	24.2813	22.7821	11.0474	19.8838	22.225	5.35285	58.1108	47.4617
XLOC_002495	nspd-1	598.908	553.529	49.8363	469.014	473.519	29.9157	1202.27	972.449
XLOC_002497	T27A3.5	46.968	47.5721	10.6401	44.5038	47.7465	5.77058	105.18	98.0209
XLOC_002499	T27A3.6	21.5032	20.6678	32.5059	24.1081	23.6283	42.9179	74.6769	90.6543
XLOC_002500	T27A3.7	15.1914	12.0094	11.8064	11.9386	12.9701	9.36036	39.0072	34.2691
XLOC_002504	abt-6	0.166903	0.349005	0	0	0	0	0.515908	0
XLOC_002505	ttr-55	20.9989	19.6257	3.2433	15.6852	15.248	0.642572	43.8679	31.5758
XLOC_002506	T09B4.6	5.9182	5.82764	5.39265	6.30607	7.23658	3.30002	17.1385	16.8427
XLOC_002507	T09B4.7	6.44128	5.45232	2.66985	9.16281	10.0348	1.94493	14.5634	21.1425
XLOC_002509	T09B4.8	78.215	78.2288	84.9499	82.2467	81.082	113.954	241.394	277.283
XLOC_002511	T09B4.9	58.6846	57.8223	92.5737	53.2887	60.0216	114.392	209.081	227.702
XLOC_002512	chn-1	31.5021	26.5064	30.9514	29.9392	29.04	31.9576	88.9599	90.9368
XLOC_002513	T05E7.4	5.00828	6.59088	2.90037	3.11016	3.53919	2.73857	14.4995	9.38792
XLOC_002515	vet-1	0.0726729	0.0740604	0.102726	0.235374	0.139232	0.081483	0.249459	0.456089
XLOC_002516	T08B2.7	187.215	190.65	206.875	204.449	195.997	259.828	584.74	660.274
XLOC_002517	T08B2.8	103.985	95.7475	111.242	110.589	103.866	126.174	310.975	340.629
XLOC_002518	fars-1	122.297	124.239	105.533	118.574	121.875	109.896	352.069	350.345
XLOC_002520	rps-17	4074.35	4096.53	3657.04	4225.33	3835.49	4103.31	11827.9	12164.1
XLOC_002521	T08B2.11	8.55342	8.11877	4.48526	7.70122	9.07212	2.1341	21.1575	18.9074
XLOC_002522	T08B2.12	211.167	209.849	19.3511	145.998	152.789	8.68404	440.367	307.471
XLOC_002524	spp-15	78.9837	58.4985	138.16	99.8445	100.156	166.154	275.642	366.154
XLOC_002527	oac-9	8.83277	7.41973	1.22442	7.37629	7.42387	0.356713	17.4769	15.1569
XLOC_002528	twk-37	2.73055	2.27666	0.142907	2.08876	2.4396	0.450949	5.15012	4.97931
XLOC_002529	C10G11.8	102.101	94.6875	8.76135	71.0907	72.4712	4.2968	205.55	147.859
XLOC_002530	C10G11.9	135.873	132.936	15.0554	97.0513	101.244	8.34198	283.864	206.637
XLOC_002536	C10G11.10	8.41834	3.46177	0.511207	5.57009	4.42783	0.607414	12.3913	10.6053
XLOC_002537	let-381	1.24651	1.50436	0.794736	0.834374	0.643773	0.735135	3.54561	2.21328
XLOC_002538	K04F10.8	6.18791	6.16638	8.44588	5.39633	6.36704	7.98065	20.8002	19.744
XLOC_002539	mut-2	13.5221	14.6457	14.5913	13.3844	15.464	12.2577	42.7591	41.1061
XLOC_002542	ZC328.2	8.16026	6.08587	10.7651	7.50387	7.14557	10.7171	25.0112	25.3665
XLOC_002543	ZC328.5	0.474479	0.248225	0.664787	0	0.231941	0.797258	1.38749	1.0292
XLOC_002544	ZC328.3	15.0561	15.8338	21.5906	20.7937	18.231	33.1328	52.4805	72.1575
XLOC_002545	rbx-2	27.2272	26.2734	23.9378	22.4329	34.1167	26.2683	77.4384	82.8179
XLOC_002546	F37E3.2	0.375612	0.234527	0.522155	0.327916	0.288523	0.248686	1.13229	0.865125
XLOC_002547	F37E3.3	19.8946	18.4717	1.76828	15.3251	16.0386	1.2138	40.1346	32.5775
XLOC_002549	T23H2.3	23.1029	24.4617	22.0691	25.4758	23.5546	21.7605	69.6337	70.7909
XLOC_002550	T23H2.4	3.61062	3.73271	4.47778	6.45734	5.91206	3.99572	11.8211	16.3651
XLOC_002552	rab-10	171.115	162.426	156.8	157.457	167.882	165.808	490.341	491.147
XLOC_002553	acdh-3	121.773	127.776	145.218	126.353	119.871	174.179	394.767	420.403
XLOC_002554	cdc-25.1	36.6452	38.845	27.9751	29.6796	31.6547	21.1405	103.465	82.4748
XLOC_002555	K06A5.8	2.12559	1.46876	3.24029	2.00231	2.1658	3.51085	6.83464	7.67896
XLOC_002557	dbr-1,mdt-18	63.6828	63.7526	79.003	70.0024	62.2053	90.3694	206.438	222.577
XLOC_002558	C55B7.10	17.1073	16.5007	2.61146	17.1854	16.1826	1.86467	36.2195	35.2327
XLOC_002559	C55B7.11	14.9216	14.4693	10.9743	13.9935	13.9557	7.05249	40.3652	35.0017
XLOC_002560	che-1	0	0	0.231705	0	0	0	0.231705	0
XLOC_002561	T10E9.5	0.421633	0	0	0	0.608646	0	0.421633	0.608646
XLOC_002563	T10E9.6	11.1823	7.33512	1.77478	6.63318	9.85629	0.712437	20.2922	17.2019
XLOC_002564	nuo-2	237.05	225.361	315.501	228.916	227.068	334.93	777.912	790.914
XLOC_002565	T10E9.8	9.54728	8.70059	15.4398	12.9968	10.9846	20.0637	33.6877	44.0451
XLOC_002566	F57B10.8,acdh-4	33.0332	26.4415	22.6315	27.1995	26.45	20.4251	82.1062	74.0746
XLOC_002567	F57B10.9	6.90327	7.96114	8.05712	7.22627	8.13045	8.93839	22.9215	24.2951
XLOC_002568	F57B10.14	1163.4	1240.39	1584.76	1196.09	1202.88	1777.48	3988.55	4176.45
XLOC_002569	dad-1	503.869	479.391	519.553	522.953	520.176	556.807	1502.81	1599.94
XLOC_002570	bag-1	62.2223	58.5509	60.4736	55.1398	67.6254	56.4553	181.247	179.22
XLOC_002571	mei-2	30.9905	26.0264	11.3422	18.5988	18.2783	8.3948	68.3591	45.2719
XLOC_002574	D2092.5	22.8923	23.4394	19.402	22.0266	22.1477	19.3803	65.7337	63.5546
XLOC_002575	D2092.4	59.1788	66.7397	77.1462	67.0697	70.1601	70.3128	203.065	207.543
XLOC_002576	acr-11	2.27277	1.77027	2.91484	2.91087	2.41377	3.29816	6.95788	8.6228
XLOC_002577	ppfr-2	26.6234	24.5348	22.3551	24.56	24.1419	19.9844	73.5133	68.6863
XLOC_002578	D2092.10	0.777164	0	0	0.422111	0	0.433731	0.777164	0.855842
XLOC_002579	D2092.1	10.4173	9.03157	6.26455	9.33763	9.68665	4.57723	25.7134	23.6015
XLOC_002580	try-7	9.45575	10.5162	1.1886	7.84747	9.19325	0.738572	21.1606	17.7793
XLOC_002581	ZC581.10	32.9063	26.7081	5.98904	32.0801	25.5358	2.70866	65.6034	60.3246
XLOC_002583	ZC581.7	21.6324	19.4135	7.17183	18.9623	20.6433	3.54908	48.2177	43.1547
XLOC_002584	ZC581.9	4.19183	3.84933	3.60109	4.87691	4.261	5.49874	11.6423	14.6366
XLOC_002586	ckr-1	0.915937	0.634818	1.54394	0.709694	0.536655	0.607681	3.0947	1.85403
XLOC_002588	T23B3.5	175.442	153.031	13.6188	130.449	133.929	5.0398	342.092	269.418
XLOC_002589	T23B3.6	0.468814	0.736665	2.82643	1.1975	1.28206	2.15941	4.03191	4.63897
XLOC_002590	W02D3.4	42.4037	45.8285	47.5745	46.7192	44.6272	48.5188	135.807	139.865
XLOC_002591	lbp-6	1301.76	1354.38	1837.95	1586.23	1379.12	2722.15	4494.09	5687.5
XLOC_002592	ant-1.2	0.180457	0.185413	0.626275	0.196543	0	0.399342	0.992145	0.595885
XLOC_002593	lbp-5	190.481	200.794	79.9193	126.679	113.756	120.325	471.194	360.76
XLOC_002594	smg-5	11.0553	8.9524	8.93047	8.84862	11.0563	8.08761	28.9382	27.9925
XLOC_002595	unc-37	18.126	19.6357	22.2678	19.3014	20.1616	24.7636	60.0295	64.2266
XLOC_002596	fnci-1	12.4316	11.5094	12.3126	11.479	12.1394	11.9292	36.2536	35.5476
XLOC_002597	hrpf-1	32.6036	30.9874	24.3233	30.7705	34.1315	27.6123	87.9143	92.5143
XLOC_002598	F08B6.3	20.7253	23.9472	30.3042	30.3435	30.3285	37.7218	74.9767	98.3938
XLOC_002599	unc-87	595.931	652.614	658.534	604.583	583.539	688.588	1907.08	1876.71
XLOC_002600	pqn-21	9.66164	10.8809	12.5292	10.0721	10.4532	13.0982	33.0717	33.6235
XLOC_002601	C37A2.6	7.08729	6.42654	9.34981	3.85517	5.45692	11.2351	22.8636	20.5472
XLOC_002602	C37A2.7	4547.26	5022.01	3643.19	4595.49	4405.44	4137.89	13212.5	13138.8
XLOC_002604	C37A2.8	24.2284	23.4228	24.5149	23.4863	23.1998	20.8646	72.1661	67.5507
XLOC_002605	K02F2.5	17.1204	15.3244	21.2057	17.1763	18.334	19.4904	53.6505	55.0007
XLOC_002606	ser-3	2.84634	1.84351	3.63989	2.88693	2.42547	2.00751	8.32974	7.31991
XLOC_002608	H27M09.5	8.26429	6.67562	0.223215	5.97391	6.08644	0.270225	15.1631	12.3306
XLOC_002611	T21G5.4	73.5136	70.6651	7.85598	53.2558	56.9803	5.61946	152.035	115.856
XLOC_002612	asd-2	45.8119	44.533	61.8281	51.609	58.3672	56.3721	152.173	166.348
XLOC_002613	srb-15	0.15259	0	0.213913	0.167723	0.146037	0	0.366503	0.31376
XLOC_002614	smg-1	19.4982	19.6764	15.8582	18.12	18.1952	18.6746	55.0328	54.9898
XLOC_002615	bbs-9	0.331998	0.591357	0.265587	0.362826	0.594276	0.478835	1.18894	1.43594
XLOC_002616	C48B6.10	760.749	798.894	769.948	960.132	940.992	768.196	2329.59	2669.32
XLOC_002617	C48B6.9	1.4426	2.19833	2.19315	1.9946	2.0208	1.14946	5.83408	5.16486
XLOC_002619	T10B11.4	0.492877	0	0	0.633339	0.566015	0.105358	0.492877	1.30471
XLOC_002620	T10B11.5	13.0602	12.4446	14.1849	13.2828	14.1782	12.5346	39.6897	39.9956
XLOC_002621	T10B11.6	21.3462	23.6538	32.4894	21.2272	23.4693	32.7288	77.4894	77.4253
XLOC_002622	T10B11.7	20.2542	18.4493	19.2665	19.0548	19.1564	17.3838	57.97	55.595
XLOC_002623	T10B11.8	12.7079	9.91983	5.71988	11.0969	12.3829	5.41814	28.3476	28.8979
XLOC_002624	C30F12.1	14.8204	14.5254	15.6703	18.539	16.8746	21.8637	45.0161	57.2773
XLOC_002625	C30F12.2	23.4151	23.045	27.9043	25.0555	24.9113	31.1929	74.3644	81.1597
XLOC_002626	C30F12.3	1.11931	2.32453	3.08107	1.55876	1.99266	1.39316	6.52491	4.94458
XLOC_002627	C30F12.4	16.8705	17.5283	7.95144	15.2865	12.8252	6.39522	42.3502	34.5069
XLOC_002628	C30F12.5	34.4999	30.5092	29.8372	12.6749	11.768	47.2297	94.8463	71.6726
XLOC_002629	H06O01.4	1.14466	1.06261	0.0214099	0.984962	1.58422	0.543212	2.22868	3.11239
XLOC_002630	H06O01.2	16.0388	15.6907	23.5852	16.8126	18.3532	24.5945	55.3147	59.7603
XLOC_002631	pdi-3	749.082	800.509	737.68	843.288	810.104	854.702	2287.27	2508.09
XLOC_002637	W01A8.7	0	0.420482	0.954348	0	0.391524	0.152836	1.37483	0.54436
XLOC_002638	W01A8.2,W01A8.8	28.0914	29.8463	23.8958	25.7439	25.2143	27.8907	81.8335	78.8489
XLOC_002639	W01A8.10	5.39034	4.48166	1.05036	3.86484	3.88995	0.830126	10.9224	8.58492
XLOC_002641	nuo-6	375.62	411.479	515.989	419.738	400.862	580.01	1303.09	1400.61
XLOC_002642	W01A8.6	23.8666	25.8972	21.1468	37.6243	47.5376	11.7272	70.9106	96.8891
XLOC_002644	kin-14	22.5519	20.4347	12.9793	22.1591	22.1204	13.3296	55.9659	57.6091
XLOC_002645	F22D6.2	266.806	269.099	186.256	245.626	239.355	189.563	722.161	674.544
XLOC_002646	nars-1	140.591	138.048	112.823	130.885	120.049	111.54	391.462	362.474
XLOC_002647	prpf-4	46.7577	47.4456	39.6267	44.1223	44.8122	40.472	133.83	129.406
XLOC_002649	F22D6.8	17.5265	13.8954	9.64332	13.2714	11.7952	11.3173	41.0652	36.3839
XLOC_002650	F22D6.15	8.42703	7.52382	19.4104	10.1383	12.6188	26.1539	35.3612	48.911
XLOC_002652	K10D3.6	15.3439	10.3126	16.9658	10.8209	12.2241	7.14001	42.6223	30.185
XLOC_002654	unc-14	23.9656	26.4055	31.3726	24.4936	22.674	27.1135	81.7437	74.2811
XLOC_002655	H37N21.1,K07G5.6,K10D3.4	93.0065	96.9116	217.786	116.773	123.875	165.407	407.704	406.055
XLOC_002656	crmL-1	30.8722	30.5156	32.2005	31.7851	31.9979	32.6606	93.5883	96.4436
XLOC_002657	K07G5.4	1.36985	0.714493	0.316854	0.870775	0.109702	0.126108	2.4012	1.10658
XLOC_002658	M05B5.2	83.8411	79.5329	117.327	96.9924	89.1028	83.8838	280.701	269.979
XLOC_002659	M05B5.7	17.2325	17.7124	2.21166	16.3113	6.84958	0.888668	37.1566	24.0495
XLOC_002661	M05B5.1	19.0718	18.8765	1.50283	12.9524	15.259	1.21683	39.4511	29.4282
XLOC_002663	hlh-2	1.09558	1.35104	1.5813	0.858999	1.22861	1.57972	4.02792	3.66733
XLOC_002664	col-61	12.2066	14.248	4.55618	11.5238	9.34218	1.36214	31.0108	22.2281
XLOC_002665	C01H6.2,C01H6.3	3.47045	4.20924	13.2272	6.79515	6.64199	15.4253	20.9069	28.8624
XLOC_002666	C01H6.9	9.3734	8.05402	8.10958	9.48943	8.15087	7.55441	25.537	25.1947
XLOC_002667	R06C7.2	4.35665	4.84644	3.30468	4.23708	4.40185	3.33258	12.5078	11.9715
XLOC_002668	dhp-1	12.6902	10.9359	31.5581	16.1046	18.328	35.0603	55.1842	69.4929
XLOC_002669	R06C7.5,R06C7.6	98.2	103.233	96.9182	91.4336	85.045	122.037	298.351	298.516
XLOC_002670	lin-61	23.609	22.1607	20.7444	20.6366	22.6223	19.9477	66.5141	63.2066
XLOC_002671	let-75	43.0176	41.6612	37.4556	35.7214	34.6453	20.1648	122.134	90.5315
XLOC_002672	twk-1	7.22238	5.64838	7.36624	4.20914	4.52074	12.2686	20.237	20.9985
XLOC_002673	tyr-3	0.194958	0.101958	0.0677455	0.265275	0.330019	0.0539857	0.364661	0.64928
XLOC_002674	F21C3.7,hint-1	144.89	132.99	156.905	146.357	136.674	176.855	434.785	459.886
XLOC_002676	rde-2	14.7822	14.3258	13.8443	13.5834	14.3552	13.2233	42.9523	41.1619
XLOC_002677	pfd-6	151.997	138.441	121.843	143.411	144.776	138.228	412.281	426.415
XLOC_002678	F21C3.6	4.94896	5.57891	0.710584	4.92519	4.05345	0	11.2385	8.97864
XLOC_002682	F13G3.3	0.747269	1.35082	7.41046	2.27774	1.47788	8.76449	9.50855	12.5201
XLOC_002683	dylt-1	127.177	129.104	136.903	139.523	136.649	165.023	393.184	441.195
XLOC_002684	ttx-7	76.2399	90.3777	99.9677	81.8093	80.669	118.185	266.585	280.663
XLOC_002685	F13G3.6	19.7395	17.1452	19.0262	15.241	21.3174	13.822	55.9109	50.3804
XLOC_002686	eat-5	0.914038	0.632915	1.28769	0.994691	2.03463	1.6594	2.83464	4.68872
XLOC_002687	F13G3.10,mif-3	498.269	458.128	395.569	534.632	538.472	395.617	1351.97	1468.72
XLOC_002688	gpb-2	28.7571	30.4574	45.0174	36.1092	33.581	36.732	104.232	106.422
XLOC_002689	F52A8.3	8.74254	9.22735	5.8623	2.59164	4.58186	5.01287	23.8322	12.1864
XLOC_002691	F52A8.5	218.014	219.476	321.041	217.429	195.742	440.675	758.531	853.846
XLOC_002692	inx-14	28.3466	26.3466	17.6141	23.834	26.1783	12.5012	72.3073	62.5135
XLOC_002693	F07A5.4	2.23624	1.37591	2.73621	1.36946	1.04877	3.40372	6.34836	5.82195
XLOC_002694	sue-1	3.51358	3.30128	3.19172	3.96002	2.98773	2.82611	10.0066	9.77386
XLOC_002695	unc-15	622.448	655.02	550.031	598.069	583.938	487.354	1827.5	1669.36
XLOC_002696	col-35	0.166569	0.179722	0.220048	0.179502	0.0795556	0	0.566339	0.259058
XLOC_002698	sol-1	1.73702	2.61625	3.7552	3.02893	2.96023	2.04855	8.10847	8.03771
XLOC_002699	C15A11.4	4.33117	3.77185	1.96428	2.40826	3.15599	0.679416	10.0673	6.24367
XLOC_002700	col-62	178.554	107.872	1.0613	4.75684	1.3546	0.394566	287.487	6.50601
XLOC_002701	lars-2	21.5368	18.7974	25.9774	19.7843	21.0833	26.9671	66.3116	67.8347
XLOC_002702	ZK524.4	13.6526	12.2576	13.4915	11.2072	12.1662	12.5039	39.4017	35.8773
XLOC_002703	T28F4.1	23.0628	21.4284	34.5578	24.3594	24.4928	29.9747	79.049	78.8269
XLOC_002704	T28F4.3	10.5109	10.2977	2.52034	8.85552	10.2803	1.82626	23.3289	20.9621
XLOC_002705	T28F4.4	7.22684	7.78053	8.53151	7.04786	6.80984	8.07207	23.5389	21.9298
XLOC_002706	T28F4.6	2.47134	2.39622	4.19378	2.80813	2.99456	4.19792	9.06134	10.0006
XLOC_002707	C26C6.8	0.300251	0	0.208172	0.323428	0.716208	0.164984	0.508423	1.20462
XLOC_002709	C26C6.10,C26C6.9	39.8162	41.9173	41.6895	44.6114	38.1573	64.2275	123.423	146.996
XLOC_002710	dcp-66	24.2739	24.9415	32.1559	27.8692	25.9484	34.3159	81.3713	88.1335
XLOC_002713	D2030.1	49.5324	48.5846	53.4837	55.8554	54.4356	54.2756	151.601	164.567
XLOC_002714	D2030.3	40.5606	37.3518	25.2731	34.1312	36.7702	21.5783	103.185	92.4797
XLOC_002715	D2030.4	323.402	324.521	334.213	336.445	307.11	394.928	982.136	1038.48
XLOC_002716	prg-1	123.122	120.992	98.08	120.241	115.604	76.7543	342.194	312.599
XLOC_002719	capg-1	23.1281	20.5237	20.3875	17.97	23.1489	19.1854	64.0393	60.3043
XLOC_002720	F26A3.1,ncbp-2	84.6022	81.6974	80.6307	81.235	81.0971	98.1667	246.93	260.499
XLOC_002721	ego-1,rrf-1	30.7159	26.1477	24.9696	28.3114	28.99	25.4943	81.8332	82.7957
XLOC_002723	F26A3.4	28.1426	26.7158	55.4436	28.7056	23.6572	51.7422	110.302	104.105
XLOC_002724	del-3	1.21559	1.34254	1.6115	1.5769	1.32769	0.771162	4.16963	3.67575
XLOC_002725	F26A3.7	19.4926	22.0689	19.4441	22.5629	23.6849	19.4146	61.0056	65.6624
XLOC_002726	T23G11.6	38.2357	36.9173	118.937	58.9512	60.4979	156.225	194.09	275.674
XLOC_002727	T23G11.1	183.83	175.668	12.8929	139.913	130.461	9.02118	372.391	279.395
XLOC_002728	lsy-22	26.5829	28.8991	27.1473	26.4061	26.6174	25.8155	82.6293	78.839
XLOC_002730	F27D4.7	32.6285	29.5453	27.0084	32.3856	25.8925	26.6191	89.1822	84.8972
XLOC_002732	nsf-1	35.2908	37.8435	43.7787	39.7475	42.1072	46.9978	116.913	128.853
XLOC_002733	VH15N14R.1	0.326311	0.862184	0.446658	0.701823	0.156891	0.534697	1.63515	1.39341
XLOC_002734	D2005.1	19.0664	21.1166	15.7216	16.0647	15.4448	13.0082	55.9046	44.5177
XLOC_002735	D2005.6	6.9637	5.33268	9.2216	6.74851	7.25162	8.79521	21.518	22.7953
XLOC_002736	nlp-8	16.1887	16.6962	30.9093	21.1613	23.0021	30.8299	63.7942	74.9933
XLOC_002737	D2005.3	76.3102	81.065	63.2759	82.8865	74.913	65.8968	220.651	223.696
[truncated: 16,106 more rows]

## Sheet: signific diff expr PTE 0.025gmL
test_id	gene_id	Gene	Locus	Sample_1	Sample_2	Status	Value_1	Value_2	log2(fold_change)	test_stat	p_Value	q_Value	Significant	Fold Change
XLOC_000813	XLOC_000813	col-7	I:7401671-7402753	Con123	PTE0.025g/mL_123	OK	86.4937	5.0246	-4.10551	4.70033	2.59737e-06	0.0140131	yes	17.214
XLOC_002677	XLOC_002677	col-62	I:7403337-7404349	Con123	PTE0.025g/mL_123	OK	96.6201	6.3075	-3.93718	4.66917	3.02418e-06	0.0140131	yes	15.3183
XLOC_034425	XLOC_034425	vit-5	X:3403456-3408591	Con123	PTE0.025g/mL_123	OK	179.162	9.75472	-4.19902	6.01356	1.81493e-09	2.52293e-05	yes	18.3667
XLOC_037263	XLOC_037263	vit-4	X:3558825-3563978	Con123	PTE0.025g/mL_123	OK	152.496	18.6845	-3.02885	4.53245	5.83035e-06	0.0202619	yes	8.16163

## Sheet: signific diff expr PTE 0.05gmL
Test_Id	Gene_Id	Gene	Locus	Sample_1	Sample_2	Status	Value_1	Value_2	log2(fold_change)	Test_Stat	p_Value	q_Value	Significant	Fold Change
XLOC_000825	XLOC_000825	col-7	I:7401671-7402753	Con123	PTE0.05g/mL_123	OK	85.955	0.998998	-6.42696	6.33348	2.39699e-10	1.66723e-06	yes	86.0412
XLOC_002700	XLOC_002700	col-62	I:7403337-7404349	Con123	PTE0.05g/mL_123	OK	96.0316	2.1226	-5.49961	5.58596	2.32408e-08	0.000107767	yes	45.2424
XLOC_005888	XLOC_005888	K10H10.4	II:14500408-14501588	Con123	PTE0.05g/mL_123	OK	22.4694	0.713717	-4.97646	4.5465	5.4546e-06	0.00665532	yes	31.4822
XLOC_006818	XLOC_006818	dct-5	II:5435702-5436916	Con123	PTE0.05g/mL_123	OK	24.7922	0.711947	-5.12197	4.53571	5.74105e-06	0.00665532	yes	34.8231
XLOC_007760	XLOC_007760	col-81	II:11012335-11013720	Con123	PTE0.05g/mL_123	OK	530.184	56.8036	-3.22244	4.67569	2.92974e-06	0.00509444	yes	9.33363
XLOC_010817	XLOC_010817	col-8	III:7019525-7020696	Con123	PTE0.05g/mL_123	OK	33.1374	0.487315	-6.08746	4.74299	2.1059e-06	0.00509444	yes	68
XLOC_014356	XLOC_014356	col-126	IV:11263330-11264309	Con123	PTE0.05g/mL_123	OK	49.326	2.57999	-4.25691	4.55596	5.21478e-06	0.00665532	yes	19.1187
XLOC_021290	XLOC_021290	grl-4	IV:7309823-7310749	Con123	PTE0.05g/mL_123	OK	105.943	7.90986	-3.74349	4.72762	2.27166e-06	0.00509444	yes	13.3938
XLOC_021979	XLOC_021979	col-127	IV:11264924-11265903	Con123	PTE0.05g/mL_123	OK	49.326	2.57999	-4.25691	4.55596	5.21478e-06	0.00665532	yes	19.1187
XLOC_028294	XLOC_028294	col-146	V:9629918-9630987	Con123	PTE0.05g/mL_123	OK	97.8184	7.36875	-3.73061	4.67895	2.88355e-06	0.00509444	yes	13.2748
XLOC_028510	XLOC_028510	D1054.11	V:10793774-10794904	Con123	PTE0.05g/mL_123	OK	46.7201	3.20488	-3.8657	4.09353	4.24854e-05	0.034047	yes	14.5778
XLOC_031134	XLOC_031134	abu-7	V:5163379-5164743	Con123	PTE0.05g/mL_123	OK	43.666	3.40514	-3.68072	4.08512	4.40548e-05	0.034047	yes	12.8236
XLOC_034472	XLOC_034472	vit-5	X:3403456-3408591	Con123	PTE0.05g/mL_123	OK	178.508	2.43944	-6.1933	7.60456	2.86438e-14	3.98463e-10	yes	73.1758
XLOC_034756	XLOC_034756	vit-2	X:5101000-5106142	Con123	PTE0.05g/mL_123	OK	441.567	45.6303	-3.27457	4.32067	1.55557e-05	0.0154569	yes	9.67706
XLOC_034954	XLOC_034954	C45B2.1	X:6086088-6086534	Con123	PTE0.05g/mL_123	OK	95.497	4.92586	-4.27701	4.32139	1.55053e-05	0.0154569	yes	19.3869
XLOC_035276	XLOC_035276	vit-1	X:7727849-7733257	Con123	PTE0.05g/mL_123	OK	51.4268	7.87299	-2.70754	4.19019	2.78725e-05	0.0242334	yes	6.53205
XLOC_037317	XLOC_037317	vit-4	X:3558825-3563978	Con123	PTE0.05g/mL_123	OK	151.931	11.1053	-3.77409	5.34457	9.06313e-08	0.000315193	yes	13.6809
XLOC_037318	XLOC_037318	vit-3	X:3567383-3572553	Con123	PTE0.05g/mL_123	OK	170.619	21.8954	-2.96208	4.29821	1.72187e-05	0.0159686	yes	7.79246
